# Supplementary material for: Gold-catalyzed isomerization of unactivated allenes into 1,3-dienes under ambient conditions
Source: Royal Society of Chemistry journal article supplement (doi:10.1039/c2cc32131a), 2012-01-01

## *Supporting Information*

### **Gold-catalyzed Room-Temperature Isomerization of Unactivated Allenes to 1,3-Dienes**

Ting Chun-Ming, Hsu Yi-Lin and Rai-Shung Liu\*

Department of Chemistry, National Tsing-Hua University, Hsinchu, Taiwan, ROC

----- e-mail: [rsliu@mx.nthu.edu.tw](mailto:rsliu@mx.nthu.edu.tw)

#### Table of contents:

|                                                                                           |     |
|-------------------------------------------------------------------------------------------|-----|
| (a) Experimental Procedures for Synthesis of the Substrates and Catalytic Operations----- | S2  |
| (b) Standard procedure for catalytic operations-----                                      | S7  |
| (c) Spectrum data-----                                                                    | S8  |
| (d) X-Ray data for compound ( <b>5c</b> )-----                                            | S20 |

## (a) Experimental Procedures for Synthesis of the Substrates and Catalytic Operations

### (1) General Sections

Unless otherwise noted, all reactions were carried out under a nitrogen atmosphere in oven-dried glassware using standard syringe, cannula and septa apparatus. Benzene, , tetrahydrofuran and hexane were dried with sodium benzophenone and distilled before use. Dichloromethane, diethyl ether and acetonitrile was dried over  $\text{CaH}_2$  and distilled before use. NMR spectra were run at 400 MHz ( $^1\text{H}$  NMR) or 100 MHz ( $^{13}\text{C}$  NMR) in  $\text{CDCl}_3$  or  $\text{CD}_2\text{Cl}_2$ .

### (2) Preparation of (3-methylbuta-1,2-dien-1-yl)benzene (1a)

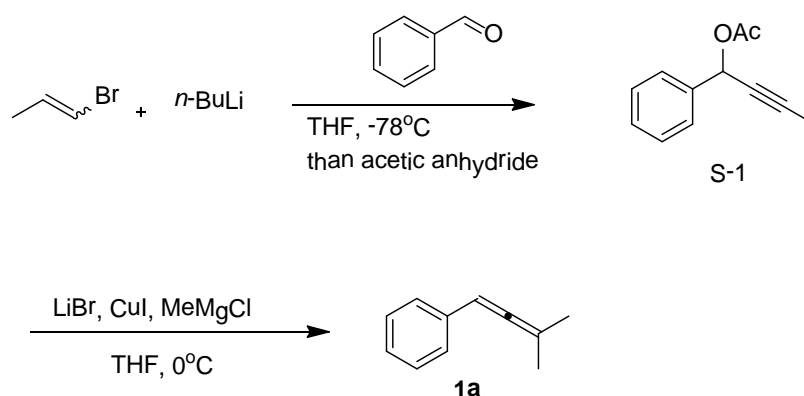

To a THF (60 mL) solution of 1-bromo-1-propene (2.6 mL, 30.1 mmol) was added  $n\text{-butyl-lithium}$  (2.5 M, 22.6 mL, 56.5 mmol) at  $-78^\circ\text{C}$ , and the mixture was stirred for 30 min before it was treated with benzaldehyde (2g, 18.8 mmol in 5 mL THF). The solution was stirred for 1 hour at room temperature. Acetic anhydride (2.8 mL, 30.1 mmol) was added to this solution at  $0^\circ\text{C}$ , and the solution was stirred for another 1 hour before addition water. The aqueous solution was extracted with  $\text{EtOAc}$ , and the organic phase was dried over  $\text{MgSO}_4$ , and evaporated to dryness. The residues were eluted through a silica gel column to afford substrate S-1 (3.05 g, 86 %).

To a THF (50 mL) solution of  $\text{CuI}$  (5.87 g, 21.2 mmol) and  $\text{LiBr}$  (2.67 g, 21.1 mmol) was added  $\text{MeMgCl}$  (22 wt% in THF, 10.2 mL, 21.2 mmol) at  $0^\circ\text{C}$ . The solution was stirred for 1 hour before added the S-1 (2.9 g, 15.4 mmol) and stirred 8 hour at room temperature. The solution was put into a beaker that contained 50 mL  $\text{Sat. Na}_2\text{CO}_{3(\text{aq})}$  and 50 mL hexane, then removed the solid by filter paper. The

aqueous solution was extracted with EtOAc, and the organic phase was dried over MgSO<sub>4</sub>, and evaporated to dryness. The residues were eluted through a silica gel column to afford substrate **1a** (2 g, 92 %) as colorless oil. We used the same procedure to prepared substrate **1b~d** and **1k~n**.

### (3) Preparation of buta-1,2-diene-1,3-diyl dibenzene<sup>[s1]</sup> (**1e**)

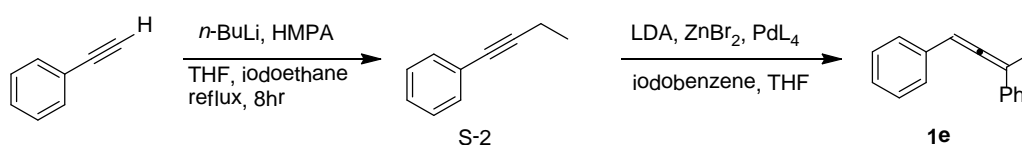

To a THF (30 mL) solution of phenylacetylene (2 g, 19.6 mmol) was added n-butyl-lithium (2.5 M, 9.4 mL, 23.5 mmol) at -40 °C. After stirring in this temperature for 30 min, HMPA (1 mL, 5.5 mmol) was added and the reaction was allowed to warm up to room temperature within 20 min. Then iodoethane (2.2 mL, 29.4 mmol) was added to the solution and the resulting solution was heated to reflux for 8 hours. The reaction was then quenched with a saturated aqueous NH<sub>4</sub>Cl solution. The aqueous solution was extracted with ether, and the organic phase was dried over MgSO<sub>4</sub>, and evaporated to dryness. The residues were eluted through a silica gel column to afford substrate S-2 (1.9 g, 75 %).

To a THF (20 mL) solution of S-2 (500 mg, 3.8 mmol) was added LDA (6.9 mmol) at 0 °C, the reaction was allowed to warm up to room temperature within 1 h. Then a solution of dry ZnBr<sub>2</sub> (4.32 g, 19.0 mmol) in THF (10 mL) was added and stirred for 25 min. Pd(PPh<sub>3</sub>)<sub>4</sub> (222 mg, 0.2 mmol) in THF (3 mL) and 4-bromoiodobenzene (0.44 mL, 3.4 mmol) were added subsequently, and the resulting mixture was stirred at room temperature. After the reaction was complete as monitored by TLC, it was quenched with saturated NH<sub>4</sub>Cl solution. The aqueous solution was extracted with ether, and the organic phase was dried over MgSO<sub>4</sub>, and evaporated to dryness. The residues were eluted through a silica gel column to afford substrate **1e** (0.8 g, 80 %).

[s1]: Jinbo Zhao, Yu Liu, Qiwen He, Yuxue Li, Shengming Ma, *Chem. Eur. J.* **2009**, *15*, 11361

### (4) Preparation of (3-methylhepta-1,2-dien-1-yl)benzene (**1f**)

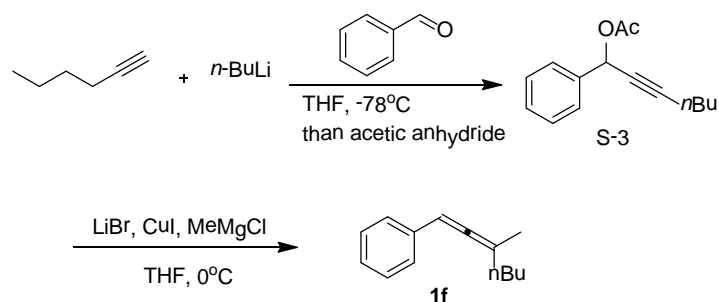

To a THF (30 mL) solution of 1-hexyne (1.4 mL, 12.2 mmol) was added *n*-butyl-lithium (2.5 M, 4.5 mL, 11.4 mmol) at -78 °C, and the mixture was stirred for 30 min before it was treated with benzaldehyde (1g, 9.4 mmol in 5 mL THF). The solution was stirred for 1 hour at room temperature. Acetic anhydride (1.5 mL, 15.1 mmol) was added to this solution at 0 °C, and the solution was stirred for another 1 hour before addition water. The aqueous solution was extracted with EtOAc, and the organic phase was dried over MgSO<sub>4</sub>, and evaporated to dryness. The residues were eluted through a silica gel column to afford substrate S-3 ( 2.0 g, 92 %).

To a THF (50 mL) solution of CuI (3.6 g, 8.6 mmol) and LiBr (0.75 g, 8.6 mmol) was added MeMgCl (22 wt% in THF, 2.9 mL, 8.6 mmol ) at 0 °C. The solution was stirred for 1 hour before added the S-3 (1 g, 4.3 mmol) and stirred 8 hour at room temperature. The solution was put into a beaker that contained 50 ml Sat.Na<sub>2</sub>CO<sub>3(aq)</sub> and 50 mL hexane, then removed the solid by filter paper. The aqueous solution was extracted with EtOAc, and the organic phase was dried over MgSO<sub>4</sub>, and evaporated to dryness. The residues were eluted through a silica gel column to afford substrate **1f** (0.7 g, 86 %) as colorless oil.

#### (5) Preparation of (2-cyclopentylidenevinyl)benzene<sup>[s2]</sup> (**1h**)

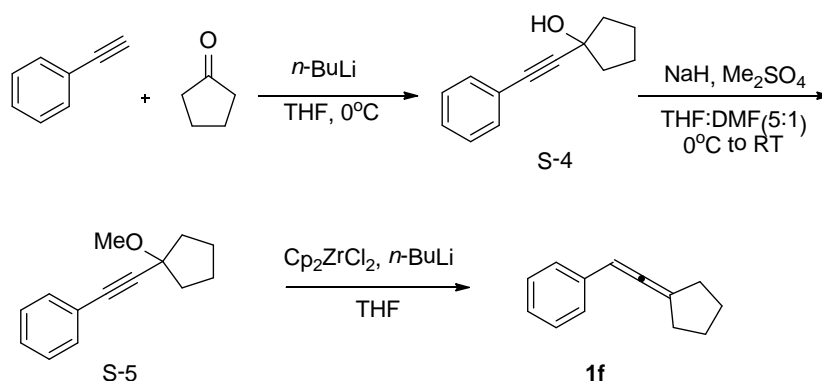

To a solution of THF (20 mL) of phenylacetylene (0.77 mL, 6.8 mmol) was added *n*-butyl-lithium (2.5 M, 2.6 mL, 6.5 mmol) at 0 °C. After stirring for 1 h at the same temperature, Cyclopentanone (0.5 g, 5.9 mmol) was added and the mixture was

warmed up to room temperature and stirred for 3 h. The reaction mixture was quenched with a saturated aqueous  $\text{NH}_4\text{Cl}$  solution. The aqueous solution was extracted with ether, and the organic phase was dried over  $\text{MgSO}_4$ , and evaporated to dryness. The residues were eluted through a silica gel column to afford substrate S-4 (0.9 g, 83 %).

At 0 °C, to a suspension of NaH (0.3 g, 7.4 mmol) in THF and DMF (5:1) was added dropwise to a THF solution (5 mL) of S-4 (1.15 g, 6.2 mmol) with stirring for 1 hour,  $\text{Me}_2\text{SO}_4$  (1.5 equiv) was added at 0 °C and stirred at room temperature for another 2 h. The reaction mixture was quenched with a saturated aqueous  $\text{NH}_4\text{Cl}$  solution. The aqueous solution was extracted with ether, and the organic phase was dried over  $\text{MgSO}_4$ , and evaporated to dryness. The residues were eluted through a silica gel column to afford substrate S-5 (1.13 g, 92 %).

To a solution of  $\text{Cp}_2\text{ZrCl}_2$  (1.16 g, 3.99 mmol) in THF (20 mL) was added *n*-BuLi (2.5 M, 3.2 mL, 7.98 mmol) at -78 °C. After the mixture was stirred for 1 h at the same temperature, S-5 (0.5 g, 2.5 mmol) was added, and then the mixture was warmed to room temperature and stirred for 3 h. The reaction mixture was quenched with 3 N HCl aqueous solution and extracted with ethyl ether. The extract was washed with saturated  $\text{NaHCO}_3$  solution and dried over  $\text{MgSO}_4$ , and evaporated to dryness. The residues were eluted through a silica gel column to afford substrate S-4 (0.36 g, 85 %). We used the same procedure to prepared substrate **1g**, **1i**, and **d<sub>6</sub>-2a**.

[s2]: Hao Zhang, Xiaoping Fu, Jingjin Chen, Erjuan Wang, Yuanhong Liu., Yuxue Li, *J. Org. Chem.* **2009**, 74, 9351.

#### (6) Preparation of octa-2,3-dien-2-ylbenzene (**1j**)

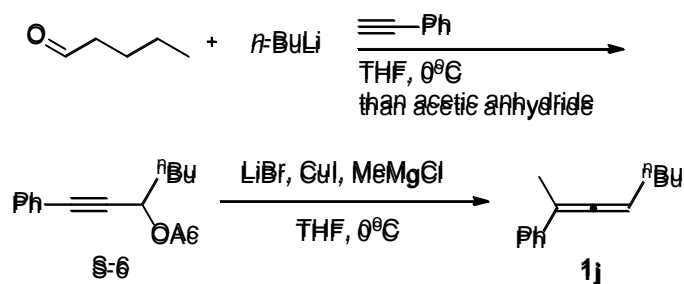

To a stirred solution of phenylacetylene (2.37 g, 23.2 mmol) in THF (20 mL) at 0 °C was slowly added *n*-BuLi (2.5 M in hexane, 9.3 mL, 23.2 mmol). The reaction mixture was further stirred at 0 °C for 30 min before addition of *n*-Valeraldehyde (2.00 g, 23.2 mmole). The reaction was then warmed to room temperature for 30 mins. After the addition of acetic anhydride (3.5 mL, 37.2 mmol) at 0 °C, the reaction mixture was

further stirred at room temperature for 2 hour. The reaction mixture was quenched with water followed by extraction with ethyl acetate. The organic layer was washed with brine, dried over anhydrous  $\text{MgSO}_4$ , and concentrated. The resulting oily residue was purified by silica gel column chromatography (hexane:EA = 10:1) to give pure S-6 (4.80 g, 20.9 mmol, 90% ).

Then a stirred solution of CuI (3.31 g, 17.4 mmol) and LiBr (1.51 g, 17.4 mmol) in THF at 0 °C was slowly added MeMgCl (22% in THF, 5.79 mL, 17.4 mmol). The reaction mixture was further stirred at room temperature for 30 min before addition of S-6 (2.00 g, 8.7 mmol) at 0 °C. The reaction mixture was then stirred at room temperature overnight. The solution was put into a beaker that contained 50 ml Sat. $\text{Na}_2\text{CO}_3$ (aq) and 50 mL hexane, then removed the solid by filter paper. The aqueous solution was extracted with EtOAc, and the organic phase was dried over  $\text{MgSO}_4$ , and evaporated to dryness. The residues were eluted through a silica gel column to afford substrate **1j** (1.33g, 7.1 mmol, 82% ).

#### (7) Preparation of (4-methylpenta-2,3-dien-2-yl)benzene (**1o**)

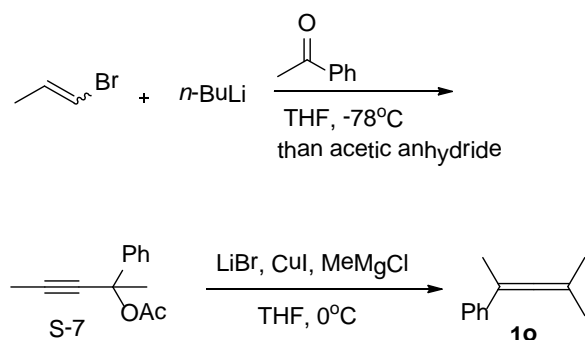

To a stirred solution of 1-bromo-1-propene (2.3 mL, 26.6 mmol) in THF (80 mL) at -78 °C was slowly added *n*-BuLi (2.5 M in hexane, 20.0 mL, 50.0 mmol). The reaction mixture was further stirred for 30 min before addition of acetophenone ( 2.00 g, 16.6 mmole). The reaction was then warmed to room temperature for 30 mins. After the addition of acetic anhydride (3.1 mL, 33.3 mmol) at 0 °C, the reaction mixture was further stirred at room temperature for 2h. The reaction mixture was quenched with water followed by extraction with ethyl acetate. The organic layer was washed with brine, dried over anhydrous  $\text{MgSO}_4$ , and concentrated. The resulting oily residue was purified by silica gel column chromatography (hexane:EA = 10:1) to give pure S-7 (2.96 g, 14.6 mmol, 88% yield).

Then a stirred solution of CuI (3.77 g, 19.8 mmol) and LiBr (1.73 g, 19.8 mmol) in THF at 0 °C was slowly added MeMgCl (22% in THF, 6.67 mL, 19.8 mmol). The reaction

mixture was further stirred at room temperature for 30 min before addition of S-7 (2.00 g, 9.9 mmol) at 0 °C. The solution was put into a beaker that contained 50 ml Sat.Na<sub>2</sub>CO<sub>3</sub>(aq) and 50 mL hexane, then removed the solid by filter paper. The aqueous solution was extracted with EtOAc, and the organic phase was dried over MgSO<sub>4</sub>, and evaporated to dryness. The residues were eluted through a silica gel column to afford substrate **1o** (1.43 g, 8.3 mmol, 84% ). Compound **1p** and **1q** were prepared by following this procedure.

#### (8) Preparation of 1-(hepta-1,2-dien-3-yl)-4-methoxybenzene<sup>[s3]</sup> (**3a**)

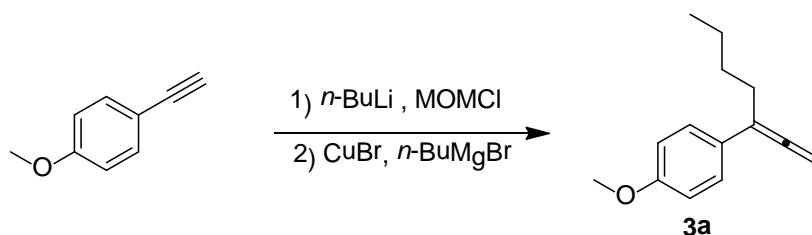

To a solution of 1-ethynyl-4-methoxybenzene (0.7 g, 5.3 mmol) in anhydrous ether (15.0 mL) was added dropwise a solution of *n*-BuLi ( 2.5 M, 2.1 mL, 5.3 mmol) at -40 °C within 10 min. After being stirred for 30 min, MOMCl (0.42 mL, 5.3 mmol) was added dropwise at the same temperature, which was followed by warming up to room temperature naturally for about 1.5 h. Then CuBr (0.152 g, 1.06 mmol) and a solution of *n*-C<sub>4</sub>H<sub>9</sub>MgBr in ether (10.6 mmol) were added dropwise sequentially to the reaction mixture for 0.5 h at room temperature. After being stirred for 1.5 hour as monitored by TLC, the reaction mixture was quenched with an aqueous solution of saturated ammonium chloride (5 mL), extracted with ether, washed with saturated brine, and dried over anhydrous sodium sulfate. The residues were eluted through a silica gel column to afford substrate **3a**. We used the same procedure to prepared substrate **3b** and **3c**.

[s3] Jing Li, Chao Zhou, Chunling Fu, Shengming Ma, *Tetrahedron*, **2009**, 65, 3695.

#### (9) Preparation of 1-(hexa-1,2-dien-1-yl)-4-methoxybenzene (**3d**)

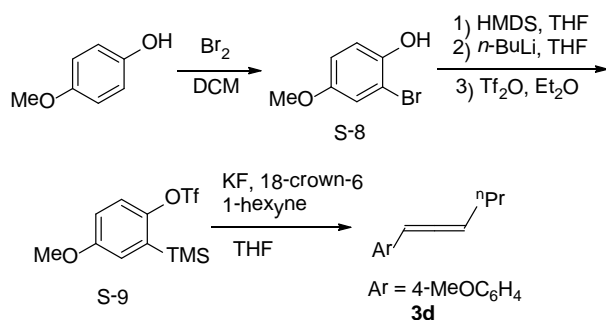

To a stirred solution of 4-methoxyphenol (3.0 g, 24.2 mmol) in dichloromethane (160 mL) was slowly added bromine (1.37 mL, 26.6 mmol) to give S-8 (4.91 g, 24.2 mmol, 100% yield).

A mixture of S-8 (6.00 g, 29.6 mmol) and HMDS (5.72 g, 35.5 mmol) in THF (96 mL) was refluxed at least 2 hour. The solvent was evaporated, and the residue was vacuumed to remove NH<sub>3</sub> and unreacted HMDS. The product was dissolved in THF (96 mL) and cooled to -78 °C. The *n*-BuLi (2.5 M in hexane, 13.0 mL, 32.5 mmol) then was added slowly at -78 °C. Stirring was kept up for 1 hour until the temperature reached -30 °C. Then Et<sub>2</sub>O (96 mL) was added. The reaction mixture was cooled to -78 °C again, Tf<sub>2</sub>O (10.4 g, 36.9 mmol) was added dropwise. Stirring was kept up for 1 hour until the temperature reached -30 °C. The reaction mixture was quenched with NaHCO<sub>3</sub> solution and extracted with ethyl acetate. The organic layer was washed with brine, dried over anhydrous MgSO<sub>4</sub>, and concentrated. The residue was purified by silica gel column chromatography (hexane:EA = 10:1) to give S-9 (7.0 g, 21.3 mmol, 72%).

A mixture of KF (0.39 g, 6.9 mmol) and 18-crown-6-ether (2.11 g, 8.0 mmol) was dissolved in THF (9 mL) before addition of S-9 (0.75 g, 2.3 mmol) and 1-hexyne (0.75 g, 9.1 mmol). The reaction mixture was stirred at room temperature for 8 hour. The reaction mixture was diluted with CH<sub>2</sub>Cl<sub>2</sub>, filtered through celite and silica gel. The residue was purified by silica gel column chromatography using hexane as eluent to give pure **3d** (0.27g, 1.4 mmol, 62% ).

### (c) Standard procedure for catalytic operations

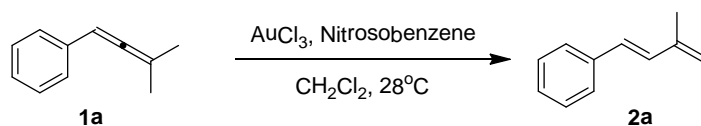

A 10-ml flask containing AuCl<sub>3</sub> (7.4 mg, 5 mole %) was dried in vacuum for 1 h before it was filled with N<sub>2</sub> using a N<sub>2</sub> balloon. To this flask was charged with

dichloromethane (3 mL) , After 5 min **1a** (3-methylbuta-1,2-dien-1-yl)benzene (70 mg, 0.49 mmol) and nitrosobenzene ( 5 mg, 10 mol %) dissolved in dichloromethane was added to flask. After 3 hour, The solution was concentrated and eluted through a silica column (hexane) to afford compounds **2a** (64 mg, 92%).

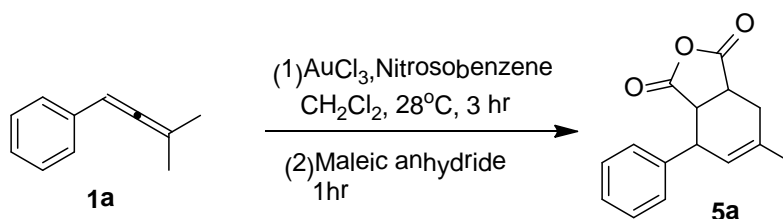

A 10-ml flask containing AuCl<sub>3</sub> (7.4 mg, 5 mole %) was dried in vacuum for 1 h before it was filled with N<sub>2</sub> using a N<sub>2</sub> balloon. To this flask was charged with dichloromethane (3 mL) , After 5 min **1a** (3-methylbuta-1,2-dien-1-yl)benzene (70 mg, 0.49 mmol) and nitrosobenzene ( 5 mg, 10 mol %) dissolved in dichloromethane was added to flask. After 3 hour was added maleic anhydride(1.05eq, in DCM). After 1 hour the solution was concentrated and eluted through a silica column (hexane/ethyl acetate = 10:1) to afford compounds **5a** (105 mg, 0.44 mol, 90%).

### (c) Spectrum data

#### Spectra data for (3-methylbuta-1,2-dien-1-yl)benzene (**1a**)

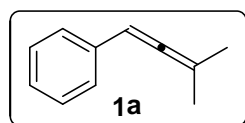

IR (neat, cm<sup>-1</sup>): 3010 (s), 1900 (s), 1620 (m), 760 (m); <sup>1</sup>H NMR (400 MHz, CDCl<sub>3</sub>): δ 7.28~7.26 (m, 4 H), 7.28~7.26 (m, 1 H), 5.99~5.93 (m, 1 H), 1.82 (s, 3 H), 1.81 (s, 3 H); <sup>13</sup>C NMR (100 MHz, CDCl<sub>3</sub>): δ 203.1, 136.0, 128.4(CH×2), 126.6(CH×2), 126.3, 99.1, 92.5, 20.2, (CH<sub>3</sub>×2).; HRMS calcd for C<sub>11</sub>H<sub>12</sub>: 144.0939; Found : 144.0935.

#### Spectra data for 1-chloro-4-(3-methylbuta-1,2-dien-1-yl)benzene (**1b**)

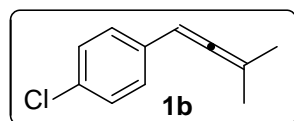

IR (neat, cm<sup>-1</sup>): 2980 (s), 1955 (s), 1570 (m), 790 (s); <sup>1</sup>H NMR (400 MHz, CDCl<sub>3</sub>): δ 7.23 (d, *J* = 10.8 Hz, 2 H), 7.16 (d, *J* = 8.8 Hz, 2 H), 5.94~5.91 (m, 1 H), 1.81 (s, 3 H), 1.80 (s, 3 H); <sup>13</sup>C NMR (100 MHz, CDCl<sub>3</sub>): δ 203.2, 134.5, 131.8, 128.5(CH×2), 127.8(CH×2),

99.6, 91.7, 20.1(CH<sub>3</sub>×2).; HRMS calcd for C<sub>11</sub>H<sub>11</sub>Cl: 178.0549; Found : 178.0547.

**Spectra data for 1-bromo-4-(3-methylbuta-1,2-dien-1-yl)benzene (1c)**

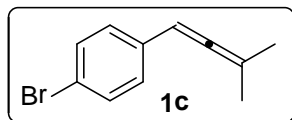

IR (neat, cm<sup>-1</sup>): 2990 (s), 1950 (s), 1520 (m), 810 (s); <sup>1</sup>H NMR (400 MHz, CDCl<sub>3</sub>): δ 7.37 (d, *J* = 8.4 Hz, 2 H), 7.10 (d, *J* = 8.4 Hz, 2 H), 5.92~5.89 (m, 1 H), 1.80 (s, 6 H); <sup>13</sup>C NMR (100 MHz, CDCl<sub>3</sub>): δ 203.2, 135.0, 131.5(CH×2), 128.1(CH×2), 119.9, 99.6, 91.7, 20.1(CH<sub>3</sub>×2).; HRMS calcd for C<sub>11</sub>H<sub>11</sub>Br: 222.0044; Found : 222.0043.

**Spectra data for 1-methyl-4-(3-methylbuta-1,2-dien-1-yl)benzene (1d)**

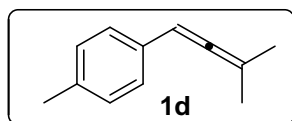

IR (neat, cm<sup>-1</sup>): 3030 (s), 1945 (s), 1640 (m), 795 (s); <sup>1</sup>H NMR (400 MHz, CDCl<sub>3</sub>): δ 7.15 (d, *J* = 8.0 Hz, 2 H), 8.08 (d, *J* = 8.0 Hz, 2 H), 5.96~5.93 (m, 1 H), 2.31 (s, 3 H), 1.80 (s, 3 H), 1.79 (s, 3 H); <sup>13</sup>C NMR (100 MHz, CDCl<sub>3</sub>): δ 202.8, 135.9, 132.9, 129.1(CH×2), 126.5(CH×2), 98.8, 92.3, 21.0, 20.2(CH<sub>3</sub>×2).; HRMS calcd for C<sub>11</sub>H<sub>14</sub>: 158.1096; Found : 158.1094.

**Spectra data for buta-1,2-diene-1,3-diyl dibenzene (1e)**

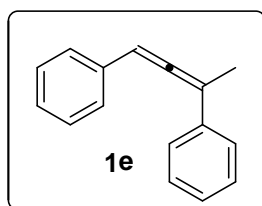

IR (neat, cm<sup>-1</sup>): 3025 (s), 1950 (s), 1620 (m), 780 (s); <sup>1</sup>H NMR (400 MHz, CDCl<sub>3</sub>): δ 7.46~7.44 (m, 2 H), 7.33~7.27 (m, 4 H), 7.22~7.17 (m, 2 H), 6.47~6.45 (m, 1 H), 2.21 (d, *J* = 2.8 Hz, 3 H); <sup>13</sup>C NMR (100 MHz, CDCl<sub>3</sub>): δ 206.8, 136.3, 134.5, 128.7(CH×2), 128.4(CH×2), 127.0(CH×2), 126.9(CH×2), 125.8(CH×2), 104.5, 96.6, 16.7. ; HRMS calcd for C<sub>16</sub>H<sub>14</sub>: 206.1096; Found : 206.1094.

**Spectra data for (3-methylhepta-1,2-dien-1-yl)benzene (1f)**

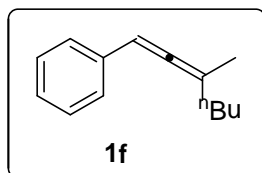

IR (neat, cm<sup>-1</sup>): 3015 (s), 1940 (s), 1580 (m), 790 (s); <sup>1</sup>H NMR (400 MHz, CDCl<sub>3</sub>): δ 7.27~7.24 (m, 4 H), 7.16~7.12 (m, 1 H), 6.04~6.01 (m, 1 H), 2.08~2.04 (m, 2 H), 1.78 (d, *J* = 2.8 Hz, 3 H), 1.49~1.41 (m, 2 H), 1.38~1.31 (m, 2 H), 0.87 (t, *J* = 7.2 Hz, 3 H); <sup>13</sup>C NMR (100 MHz, CDCl<sub>3</sub>): δ 202.7, 136.1, 128.4(CH×2), 126.5(CH×2), 126.3, 103.7, 93.8, 33.8, 29.7, 22.5, 18.8, 13.9.; HRMS calcd for C<sub>14</sub>H<sub>18</sub>: 186.1406; Found : 186.1402.

**Spectra data for (3-ethylpenta-1,2-dien-1-yl)benzene (1g)**

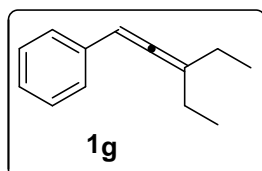

IR (neat, cm<sup>-1</sup>): 2995 (s), 1920 (s), 1550 (m), 765 (s); <sup>1</sup>H NMR (400 MHz, CDCl<sub>3</sub>): δ 7.27~7.26 (m, 4 H), 7.17~7.12 (m,

1 H), 6.18~6.15 (m, 1 H), 2.15~2.05 (m, 4 H), 1.04 (t,  $J = 7.2$  Hz, 3 H);  $^{13}\text{C}$  NMR (100 MHz,  $\text{CDCl}_3$ ):  $\delta$  201.6, 128.4(CH $\times$ 2), 126.3(CH $\times$ 3), 112.3, 96.5, 25.8(CH $_2$  $\times$ 2), 12.3(CH $_3$  $\times$ 2).; HRMS calcd for  $\text{C}_{13}\text{H}_{16}$ : 172.1252; Found : 172.1252.

**Spectra data for (2-cyclopentylidenevinyl)benzene (1h)**

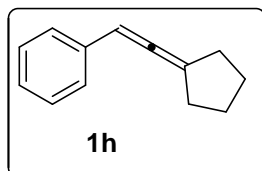

IR (neat,  $\text{cm}^{-1}$ ): 3030 (s), 1951 (s), 1598 (m), 693 (s);  $^1\text{H}$  NMR (400 MHz,  $\text{CDCl}_3$ ):  $\delta$  7.28~7.24 (m, 4 H), 7.16~7.12 (m, 1 H), 6.09~6.05 (m, 1 H), 2.54~2.41 (m, 4 H), 1.76~1.72 (m, 4 H);  $^{13}\text{C}$  NMR (100 MHz,  $\text{CDCl}_3$ ):  $\delta$  198.6, 136.0, 128.4(CH $\times$ 2), 126.6(CH $\times$ 2), 126.3, 107.5, 94.9, 31.1(CH $_2$  $\times$ 2), 27.1(CH $_2$  $\times$ 2).

HRMS calcd for  $\text{C}_{13}\text{H}_{14}$ : 170.1096; Found : 170.1094.

**Spectra data for (2-cyclohexylidenevinyl)benzene (1i)**

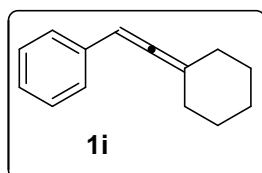

IR (neat,  $\text{cm}^{-1}$ ): 2928 (s), 1965 (s), 1446 (m), 851 (s);  $^1\text{H}$  NMR (400 MHz,  $\text{CDCl}_3$ ):  $\delta$  7.27~7.26 (m, 4 H), 7.16~7.12 (m, 1 H), 5.98~5.96 (m, 1 H), 2.28~2.26 (m, 2 H), 2.21~2.14 (m, 2 H), 1.71~1.57 (m, 6 H);  $^{13}\text{C}$  NMR (100 MHz,  $\text{CDCl}_3$ ):  $\delta$  199.6, 136.1, 128.4(CH $\times$ 2), 126.5(CH $\times$ 2), 126.2, 106.4, 92.4, 31.3(CH $_2$  $\times$ 2), 27.7(CH $_2$  $\times$ 2), 26.1.;

HRMS calcd for  $\text{C}_{14}\text{H}_{16}$ : 184.1252; Found : 184.1251.

**Spectra data for octa-2,3-dien-2-ylbenzene (1j)**

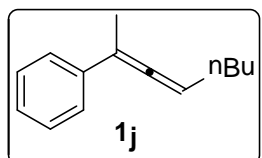

IR (neat,  $\text{cm}^{-1}$ ): 1952, 1612, 3014, 2935;  $^1\text{H}$  NMR (400 MHz,  $\text{CDCl}_3$ ):  $\delta$  7.58 (d,  $J = 7.2$  Hz, 2 H), 7.30 (t,  $J = 8.0$  Hz, 2 H), 7.17 (t,  $J = 7.2$  Hz, 1 H), 5.42 (s, 1 H), 2.07~2.12 (m, 5 H), 1.34~1.46 (m, 4 H), 0.89 (t,  $J = 7.2$  Hz, 3 H);  $^{13}\text{C}$  NMR (100 MHz,  $\text{CDCl}_3$ ):  $\delta$  204.1, 137.7, 128.2(CH $\times$ 2), 126.2, 125.5(CH $\times$ 2), 100.3, 93.0, 31.4, 28.7, 22.3, 17.1, 13.9; HRMS calcd. For  $\text{C}_{14}\text{H}_{18}$ : 186.2920; Found: 182.2920.

**Spectra data for 2-(3-methylbuta-1,2-dien-1-yl)thiophene (1k)**

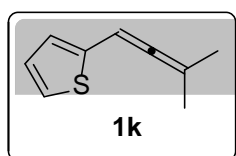

IR (neat,  $\text{cm}^{-1}$ ): 3110 (m), 1890 (s), 1540 (m), 690 (s);  $^1\text{H}$  NMR (400 MHz,  $\text{CDCl}_3$ ):  $\delta$  7.09 (d,  $J = 5.2$  Hz, 1 H), 6.90 (dd,  $J = 5.2$ , 3.6 Hz, 1 H), 6.83 (d,  $J = 3.6$  Hz, 1 H), 6.19~6.16 (m, 1 H), 1.79 (s, 3 H), 1.78 (s, 3 H);  $^{13}\text{C}$  NMR (100 MHz,  $\text{CDCl}_3$ ):  $\delta$  202.4, 140.9, 127.3, 123.9, 123.8, 99.6, 86.8, 20.3(CH $_3$  $\times$ 2).; HRMS calcd for  $\text{C}_9\text{H}_{10}\text{S}$ : 150.0503; Found : 150.0500.

**Spectra data for 3-(3-methylbuta-1,2-dien-1-yl)thiophene (1l)**

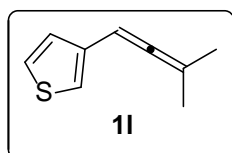

IR (neat,  $\text{cm}^{-1}$ ): 2970 (m), 1820 (s), 1490 (m), 720 (s);  $^1\text{H}$  NMR (400 MHz,  $\text{CDCl}_3$ ):  $\delta$  7.23~7.21 (m, 1 H), 7.02 (d,  $J = 4.8$  Hz, 1 H), 6.99 (d,  $J = 3.2$  Hz, 1 H), 6.05~6.02 (m, 1 H), 1.78 (s, 3 H), 1.77 (s, 3 H);  $^{13}\text{C}$  NMR (100 MHz,  $\text{CDCl}_3$ ):  $\delta$  203.1, 137.5, 126.4, 125.5, 119.8, 89.2, 87.1, 20.4( $\text{CH}_3 \times 2$ ).; HRMS calcd for  $\text{C}_9\text{H}_{10}\text{S}$ : 150.0503; Found : 150.0502.

#### Spectra data for 3-(3-methylbuta-1,2-dien-1-yl)furan (1m)

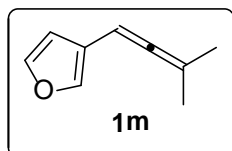

IR (neat,  $\text{cm}^{-1}$ ): 3110 (m), 1880 (s), 1155 (s), 869 (s);  $^1\text{H}$  NMR (400 MHz,  $\text{CDCl}_3$ ):  $\delta$  7.32 (s, 2 H), 6.33 (s, 1 H), 5.88~5.85 (m, 1 H), 1.76 (s, 3 H), 1.75 (s, 3 H);  $^{13}\text{C}$  NMR (100 MHz,  $\text{CDCl}_3$ ):  $\delta$  202.8, 143.1, 138.9, 121.6, 109.0, 98.0, 82.4, 20.3( $\text{CH}_3 \times 2$ ). HRMS calcd for  $\text{C}_9\text{H}_{10}\text{O}$ : 134.0732; Found : 134.0732.

#### Spectra data for 3-(3-methylbuta-1,2-dien-1-yl)benzo[b]thiophene (1n)

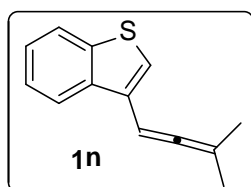

IR (neat,  $\text{cm}^{-1}$ ): 3070 (m), 1910 (s), 1500 (s), 800 (s);  $^1\text{H}$  NMR (400 MHz,  $\text{CDCl}_3$ ):  $\delta$  8.04 (d,  $J = 7.6$  Hz, 1 H), 7.82 (d,  $J = 7.6$  Hz, 1 H), 7.39~7.31 (m, 2 H), 7.20 (s, 1 H), 6.35~6.32 (m, 1 H), 1.86 (s, 3 H), 1.85 (s, 3 H);  $^{13}\text{C}$  NMR (100 MHz,  $\text{CDCl}_3$ ):  $\delta$  203.5, 140.7, 137.4, 130.5, 124.3, 124.1, 122.7, 122.6, 122.5, 98.0, 86.1, 20.7( $\text{CH}_3 \times 2$ ); HRMS calcd for  $\text{C}_{13}\text{H}_{12}\text{S}$ : 200.0600; Found : 200.0598.

#### Spectra data for (4-methylpenta-2,3-dien-2-yl)benzene (1o)

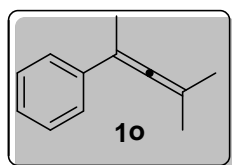

IR (neat,  $\text{cm}^{-1}$ ): 1910, 1622, 3015, 2905;  $^1\text{H}$  NMR (400 MHz,  $\text{CDCl}_3$ ):  $\delta$  7.36 (d,  $J = 7.6$  Hz, 2 H), 7.29 (t,  $J = 7.6$  Hz, 2 H), 7.15 (t,  $J = 7.2$  Hz, 1 H), 2.04 (s, 3 H), 1.78 (s, 6 H);  $^{13}\text{C}$  NMR (100 MHz,  $\text{CDCl}_3$ ):  $\delta$  202.1, 138.7, 128.1( $\text{CH} \times 2$ ), 126.1, 125.7( $\text{CH} \times 2$ ), 98.1, 96.8, 20.4( $\text{CH}_3 \times 2$ ), 17.2; HRMS calcd. For  $\text{C}_{12}\text{H}_{14}$ : 158.2390; Found: 158.2390

#### Spectra data for penta-2,3-diene-2,4-diyl dibenzene (1p)

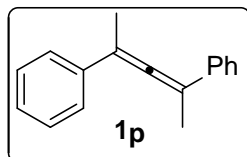

IR (neat,  $\text{cm}^{-1}$ ): 1945, 1615, 3016, 2945;  $^1\text{H}$  NMR (400 MHz,  $d^2$ -DCM):  $\delta$  7.42 (d,  $J = 6.4$  Hz, 4 H), 7.31 (t,  $J = 6.8$  Hz, 4 H), 7.20 (t,  $J = 7.6$  Hz, 2 H), 2.20 (s, 6 H);  $^{13}\text{C}$  NMR (100 MHz,  $d^2$ -DCM):  $\delta$  206.9, 137.6( $\text{C} \times 2$ ), 128.8 ( $\text{CH} \times 4$ ), 127.1( $\text{CH} \times 2$ ), 126.1( $\text{CH} \times 4$ ), 102.9( $\text{C} \times 2$ ), 17.0( $\text{CH}_3 \times 2$ ); HRMS calcd. For  $\text{C}_{17}\text{H}_{16}$ : 220.3083; Found: 220.3083.

**Spectra data for (1-cyclopentylideneprop-1-en-2-yl)benzene (1q)**

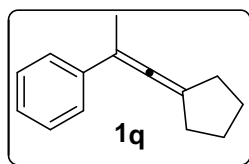

IR (neat,  $\text{cm}^{-1}$ ): 1956, 1610, 3015, 2940;  $^1\text{H}$  NMR (400 MHz,  $d^2$ -DCM):  $\delta$  7.36 (d,  $J = 6.8$  Hz, 2 H), 7.28 (t,  $J = 7.6$  Hz, 2 H), 7.15 (t,  $J = 7.6$  Hz, 1 H), 2.05~2.46 (m, 4 H), 2.05 (s, 3H), 1.55~1.76 (m, 4 H);  $^{13}\text{C}$  NMR (100 MHz,  $d^2$ -DCM):  $\delta$  208.1, 139.2, 128.6(CH $\times$ 2), 126.4, 126.1(CH $\times$ 2), 106.0, 101.0, 31.4(CH $_2$  $\times$ 2), 27.6 CH $_2$  $\times$ 2), 17.5; HRMS calcd. For C $_{14}$ H $_{16}$ : 184.2762; Found: 184.2762.

**Spectra data for (*E*)-(3-methylbuta-1,3-dien-1-yl)benzene (2a)**

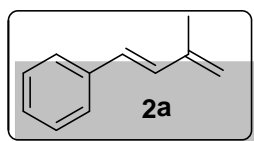

IR (neat,  $\text{cm}^{-1}$ ): 2900(s), 1605 (s), 1375 (s), 753 (s);  $^1\text{H}$  NMR (400 MHz, CDCl $_3$ ):  $\delta$  7.41 (d,  $J = 7.2$  Hz, 2 H), 7.30 (t,  $J = 7.6$  Hz, 2 H), 7.21 (t,  $J = 7.6$  Hz, 1 H), 6.86 (d,  $J = 16.0$  Hz, 1 H), 6.52 (d,  $J = 16.0$  Hz, 1 H), 5.10 (s, 1 H), 5.06 (s, 1 H), 1.96 (s, 3 H);  $^{13}\text{C}$  NMR (100 MHz, CDCl $_3$ ):  $\delta$  142.0, 137.4, 131.6, 128.7, 128.6(CH $\times$ 2), 127.4, 126.4(CH $\times$ 2), 117.3, 18.6.; HRMS calcd for C $_{11}$ H $_{12}$ : 144.0939; Found : 144.0937.

**Spectra data for (*E*)-1-chloro-4-(3-methylbuta-1,3-dien-1-yl)benzene (2b)**

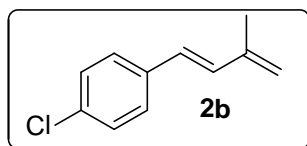

IR (neat,  $\text{cm}^{-1}$ ): 2940 (s), 1620 (s), 1370 (s), 860 (s);  $^1\text{H}$  NMR (400 MHz, CDCl $_3$ ):  $\delta$  7.33 (d,  $J = 8.4$  Hz, 2 H), 7.26 (d,  $J = 8.4$  Hz, 2 H), 6.82 (d,  $J = 16.4$  Hz, 1 H), 6.46 (d,  $J = 16.4$  Hz, 1 H), 5.11 (s, 1 H), 5.08 (s, 1 H), 1.95 (s, 6 H);  $^{13}\text{C}$  NMR (100 MHz, CDCl $_3$ ):  $\delta$  141.8, 135.9, 132.9, 132.3, 128.7(CH $\times$ 2), 127.6(CH $\times$ 2), 127.4, 117.9, 18.5.; HRMS calcd for C $_{11}$ H $_{11}$ Cl: 178.0549; Found : 178.0549.

**Spectra data for (*E*)-1-bromo-4-(3-methylbuta-1,3-dien-1-yl)benzene (2c)**

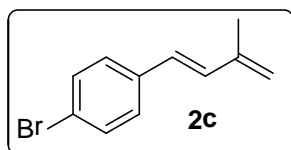

IR (neat,  $\text{cm}^{-1}$ ): 3050 (s), 1640 (s), 1350 (s), 855 (s);  $^1\text{H}$  NMR (400 MHz, CDCl $_3$ ):  $\delta$  7.42 (d,  $J = 8.4$  Hz, 2 H), 7.27 (d,  $J = 8.4$  Hz, 2 H), 6.84 (d,  $J = 16.0$  Hz, 1 H), 6.44 (d,  $J = 16.0$  Hz, 1 H), 5.11 (s, 1 H), 5.09 (s, 1 H), 1.95 (s, 3 H);  $^{13}\text{C}$  NMR (100 MHz, CDCl $_3$ ):  $\delta$  147.8, 136.3, 132.4, 131.7(CH $\times$ 2), 127.9(CH $\times$ 2), 127.4, 121.1, 118.0, 18.5.; HRMS calcd for C $_{11}$ H $_{11}$ Br: 222.0044; Found : 222.0042.

**Spectra data for (*E*)-1-methyl-4-(3-methylbuta-1,3-dien-1-yl)benzene (2d)**

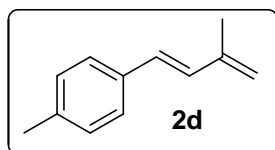

IR (neat,  $\text{cm}^{-1}$ ): 2970 (s), 1600 (s), 1330 (m), 790 (s);  $^1\text{H}$  NMR (400 MHz, CDCl $_3$ ):  $\delta$  7.30 (d,  $J = 8.0$  Hz, 2 H), 7.11 (d,  $J = 8.0$  Hz, 2 H), 6.82 (d,  $J =$

16.4 Hz, 1 H), 6.49 (d,  $J = 16.4$  Hz, 1 H), 5.07 (s, 3 H), 5.02 (s, 3 H), 2.32 (s, 3 H), 1.95 (s, 3 H);  $^{13}\text{C}$  NMR (100 MHz,  $\text{CDCl}_3$ ):  $\delta$  142.1, 137.2, 134.6, 130.7, 129.3(CH $\times$ 2), 128.6, 126.4(CH $\times$ 2), 116.8, 21.2, 18.6.; HRMS calcd for  $\text{C}_{11}\text{H}_{14}$ : 158.1096; Found : 158.1096.

**Spectra data for (*E*)-buta-1,3-diene-1,3-diylidibenzene (2e)**

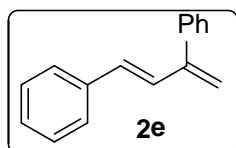

IR (neat,  $\text{cm}^{-1}$ ): 3010 (s), 1580 (s), 1395 (m), 760 (s);  $^1\text{H}$  NMR (400 MHz,  $\text{CDCl}_3$ ):  $\delta$  7.39~7.35 (m, 7 H), 7.31~7.28 (m, 2 H), 7.23~7.19 (m, 1 H), 7.03 (d,  $J = 16.4$  Hz, 1 H), 6.48 (d,  $J = 16.4$  Hz, 1 H), 5.40 (s, 1 H), 5.03 (s, 1 H);  $^{13}\text{C}$  NMR (100 MHz,  $\text{CDCl}_3$ ):  $\delta$  148.1, 140.2, 137.2, 131.9, 130.3, 128.6(CH $\times$ 2), 128.4(CH $\times$ 2), 128.2(CH $\times$ 2), 127.6, 127.5, 126.5(CH $\times$ 2), 117.3.; HRMS calcd for  $\text{C}_{16}\text{H}_{14}$ : 206.1096; Found : 206.1095.

**Spectra data for ((1*E*,3*E*)-3-methylhepta-1,3-dien-1-yl)benzene (2f-I)**

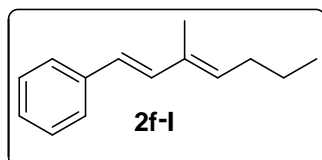

IR (neat,  $\text{cm}^{-1}$ ): 2930 (s), 1560 (s), 1335 (m), 735 (s);  $^1\text{H}$  NMR (400 MHz,  $\text{CDCl}_3$ ):  $\delta$  7.39 (d,  $J = 8.0$  Hz, 2 H), 7.27 (t,  $J = 7.6$  Hz, 2 H), 7.16 (t,  $J = 8.0$  Hz, 1 H), 6.80 (d,  $J = 16.0$  Hz, 1 H), 6.43 (d,  $J = 16.0$  Hz, 1 H), 5.63 (t,  $J = 7.6$  Hz, 1 H), 2.16 (q,  $J = 7.2$  Hz, 2 H), 1.85 (s, 3 H), 1.46~1.40 (m, 2 H), 0.92 (t,  $J = 7.2$  Hz, 3 H);  $^{13}\text{C}$  NMR (100 MHz,  $\text{CDCl}_3$ ):  $\delta$  138.0, 134.3, 134.1, 133.8, 128.5(CH $\times$ 2), 126.8, 126.1(CH $\times$ 2), 125.5, 30.5, 22.8, 13.9, 12.4.; HRMS calcd for  $\text{C}_{14}\text{H}_{18}$ : 186.1406; Found : 186.1404.

**Spectra data for ((1*E*,3*Z*)-3-methylhepta-1,3-dien-1-yl)benzene (2f-II)**

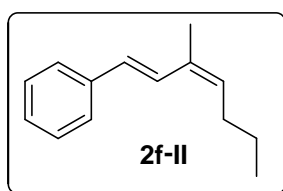

IR (neat,  $\text{cm}^{-1}$ ): 2935 (s), 1560 (s), 1335 (m), 735 (s);  $^1\text{H}$  NMR (400 MHz,  $\text{CDCl}_3$ ):  $\delta$  7.42 (d,  $J = 7.6$  Hz, 2 H), 7.30 (t,  $J = 7.6$  Hz, 2 H), 7.19 (t,  $J = 7.6$  Hz, 1 H), 7.18 (d,  $J = 16.0$  Hz, 1 H), 6.53 (d,  $J = 16.0$  Hz, 1 H), 5.45 (t,  $J = 7.6$  Hz, 1 H), 2.32 (q,  $J = 7.6$  Hz, 2 H), 1.92 (s, 3 H), 1.47~1.38 (m, 2 H), 0.93 (t,  $J = 7.2$  Hz, 3 H);  $^{13}\text{C}$  NMR (100 MHz,  $\text{CDCl}_3$ ):  $\delta$  138.1, 132.3, 132.0, 128.6(CH $\times$ 2), 128.0, 127.1, 126.3(CH $\times$ 2), 126.2, 29.7, 23.1, 20.5, 13.9.; HRMS calcd for  $\text{C}_{14}\text{H}_{18}$ : 186.1406; Found : 186.1406.

**Spectra data for ((1*E*,3*E*)-3-ethylpenta-1,3-dien-1-yl)benzene (2g-I)**

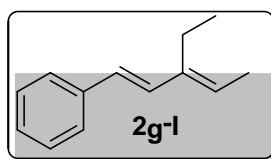

IR (neat,  $\text{cm}^{-1}$ ): 2910 (s), 1600 (s), 1355 (m), 900 (s);  $^1\text{H}$  NMR (400 MHz,  $\text{CDCl}_3$ ):  $\delta$  7.39 (d,  $J = 7.6$  Hz, 2 H), 7.28 (t,  $J = 7.6$  Hz, 2 H), 7.17 (t,  $J = 7.6$  Hz, 1 H), 6.68 (d,  $J = 16.4$  Hz, 1 H), 6.45 (d,  $J = 16.4$  Hz, 1 H), 5.64 (q,  $J = 7.2$  Hz, 1 H), 2.35 (q,

$J = 7.6$  Hz, 2 H), 1.77 (d,  $J = 7.2$  Hz, 3 H), 1.05 (t,  $J = 7.6$  Hz, 3 H);  $^{13}\text{C}$  NMR (100 MHz,  $\text{CDCl}_3$ ):  $\delta$  141.0, 138.1, 132.4, 128.5(CH $\times$ 2), 127.5, 126.8, 126.1(CH $\times$ 2), 124.8, 19.5, 13.7, 13.3.; HRMS calcd for  $\text{C}_{13}\text{H}_{16}$ : 172.1252; Found : 172.1252.

**Spectra data for ((1*E*,3*Z*)-3-ethylpenta-1,3-dien-1-yl)benzene (2g- II)**

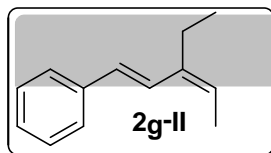

IR (neat,  $\text{cm}^{-1}$ ): 2915 (s), 1610 (s), 1355 (m), 720 (s);  $^1\text{H}$  NMR (400 MHz,  $\text{CDCl}_3$ ):  $\delta$  7.43 (d,  $J = 7.6$  Hz, 2 H), 7.31 (t,  $J = 7.6$  Hz, 2 H), 7.20 (t,  $J = 7.6$  Hz, 1 H), 7.13 (d,  $J = 16.4$  Hz, 1 H), 6.57 (d,  $J = 16.4$  Hz, 1 H), 5.53 (q,  $J = 7.2$  Hz, 1 H), 2.31 (q,  $J = 7.6$  Hz, 2 H), 1.83 (d,  $J = 7.2$  Hz, 3 H), 1.10 (t,  $J = 7.6$  Hz, 3 H);  $^{13}\text{C}$  NMR (100 MHz,  $\text{CDCl}_3$ ):  $\delta$  138.6, 138.1, 128.6(CH $\times$ 2), 127.4, 127.1, 126.3(CH $\times$ 2), 124.9, 124.2, 26.5, 13.6, 13.1.; HRMS calcd for  $\text{C}_{13}\text{H}_{16}$ : 172.1252; Found : 172.1250.

**Spectra data for (*E*)-(2-(cyclopent-1-en-1-yl)vinyl)benzene (2h)**

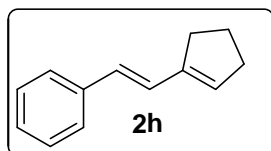

IR (neat,  $\text{cm}^{-1}$ ): 2920 (s), 1625 (s), 1340 (m), 920 (s);  $^1\text{H}$  NMR (400 MHz,  $\text{CDCl}_3$ ):  $\delta$  7.39 (d,  $J = 7.6$  Hz, 2 H), 7.29 (t,  $J = 7.6$  Hz, 2 H), 7.18 (t,  $J = 7.6$  Hz, 1 H), 7.00 (d,  $J = 16.4$  Hz, 1 H), 6.39 (d,  $J = 16.4$  Hz, 1 H), 5.84 (br, 1 H), 2.55~2.52 (m, 2 H), 2.48~2.44 (m, 2 H), 2.00~1.92 (m, 2 H);  $^{13}\text{C}$  NMR (100 MHz,  $\text{CDCl}_3$ ):  $\delta$  142.8, 137.8, 132.0, 128.6, 128.5(CH $\times$ 2), 127.0, 126.2(CH $\times$ 2), 125.7, 33.0, 31.2, 23.1.; HRMS calcd for  $\text{C}_{13}\text{H}_{14}$ : 170.1096; Found : 170.1096.

**Spectra data for (*E*)-(2-(cyclohex-1-en-1-yl)vinyl)benzene (2i)**

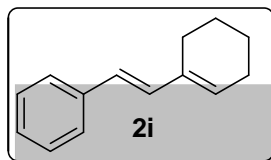

IR (neat,  $\text{cm}^{-1}$ ): 2905 (s), 1630 (s), 1330 (m), 960 (s);  $^1\text{H}$  NMR (400 MHz,  $\text{CDCl}_3$ ):  $\delta$  7.38 (d,  $J = 7.6$  Hz, 2 H), 7.28 (t,  $J = 7.6$  Hz, 2 H), 7.17 (t,  $J = 7.2$  Hz, 1 H), 6.76 (d,  $J = 16.4$  Hz, 1 H), 6.42 (d,  $J = 16.4$  Hz, 1 H), 5.89 (t,  $J = 4.0$  Hz, 1 H), 2.26~2.24 (m, 2 H), 2.18~2.17 (m, 2 H), 1.74~1.68 (m, 2 H), 1.65~1.59 (m, 2 H);  $^{13}\text{C}$  NMR (100 MHz,  $\text{CDCl}_3$ ):  $\delta$  138.0, 135.8, 132.5, 130.8, 128.5(CH $\times$ 2), 126.8, 126.1(CH $\times$ 2), 124.6, 26.1, 24.5, 22.5(CH $_2$  $\times$ 2).; HRMS calcd for  $\text{C}_{14}\text{H}_{16}$ : 184.1252; Found : 184.1250.

**Spectra data for octa-1,3-dien-2-ylbenzene (2j)**

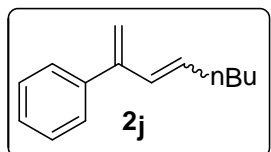

IR (neat,  $\text{cm}^{-1}$ ): 2920, 1610, 1345, 910;  $^1\text{H}$  NMR (400 MHz,  $\text{CDCl}_3$ ) (*E* form is major isomer):  $\delta$  7.25~7.41 (m, 5 H), 6.28 (d,  $J = 16.0$  Hz, 1 H), 5.61~5.72 (m, 1 H), 5.15 (s, 1 H), 5.03 (s, 1 H), 2.08~2.13 (m, 2 H), 1.22~1.35 (m, 4 H), 0.80~0.89 (m, 3 H); *Z* isomer selected peaks,  $\delta$  6.10 (d,  $J = 11.6$  Hz, 1 H), 5.50 (s, 1 H), 5.12 (s,

1 H), the remaining peaks are overlapped;  $^{13}\text{C}$  NMR (100 MHz,  $\text{CDCl}_3$ ) (E+Z):  $\delta$  148.2, 148.6, 140.9, 134.6, 134.6, 131.3, 128.7, 128.2(CH $\times$ 2), 128.2(CH $\times$ 2), 128.0 (CH $\times$ 2), 127.4, 127.2, 126.6(CH $\times$ 2), 114.6, 114.4, 32.5, 32.0, 31.4, 28.3, 22.7, 22.3, 13.9, 13.9; HRMS calcd For  $\text{C}_{14}\text{H}_{18}$ : 186.2920; Found: 182.2920.

**Spectra data for (E)-2-(3-methylbuta-1,3-dien-1-yl)thiophene (2k)**

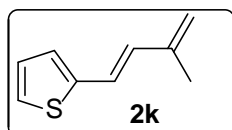

IR (neat,  $\text{cm}^{-1}$ ): 3100 (s), 1655 (s), 1420 (m), 670 (s);  $^1\text{H}$  NMR (400 MHz,  $\text{CDCl}_3$ ):  $\delta$  7.14 (d,  $J$  = 4.8 Hz, 1 H), 6.98~6.94 (m, 2 H), 6.66 (dd,  $J$  = 16.0 Hz, 2 H), 5.07 (s, 1 H), 5.03 (s, 1 H), 1.92 (s, 3 H);  $^{13}\text{C}$  NMR (100 MHz,  $\text{CDCl}_3$ ):  $\delta$  142.9, 141.6, 131.5, 127.5, 125.8, 124.1, 121.8, 117.2, 18.4; HRMS calcd for  $\text{C}_9\text{H}_{10}\text{S}$ : 150.0503; Found : 150.0503.

**Spectra data for (E)-3-(3-methylbuta-1,3-dien-1-yl)thiophene (2l)**

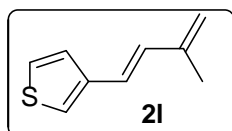

IR (neat,  $\text{cm}^{-1}$ ): 3020 (s), 1700 (s), 1425 (m), 610 (s);  $^1\text{H}$  NMR (400 MHz,  $\text{CDCl}_3$ ):  $\delta$  7.27~7.23 (m, 2 H), 7.17~7.16 (m, 1 H), 6.71 (d,  $J$  = 16.0 Hz, 1 H), 6.53 (d,  $J$  = 16.0 Hz, 1 H), 5.06 (s, 1 H), 5.02 (s, 1 H), 1.93 (s, 3 H);  $^{13}\text{C}$  NMR (100 MHz,  $\text{CDCl}_3$ ):  $\delta$  142.0, 140.1, 131.7, 126.0, 124.9, 122.9, 122.0, 116.8, 18.5; HRMS calcd for  $\text{C}_9\text{H}_{10}\text{S}$ : 150.0503; Found : 150.0502.

**Spectra data for (E)-3-(3-methylbuta-1,3-dien-1-yl)furan (2m)**

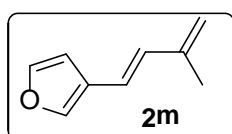

IR (neat,  $\text{cm}^{-1}$ ): 3120 (s), 1670 (s), 1450 (m), 830 (s);  $^1\text{H}$  NMR (400 MHz,  $\text{CDCl}_3$ ):  $\delta$  7.44 (s, 1 H), 7.36 (t,  $J$  = 1.6 Hz, 1 H), 6.57 (d,  $J$  = 16.0 Hz, 1 H), 6.55 (s, 1 H), 6.38 (d,  $J$  = 16.0 Hz, 1 H), 5.02 (s, 1 H), 4.99 (s, 1 H), 1.91 (s, 3 H);  $^{13}\text{C}$  NMR (100 MHz,  $\text{CDCl}_3$ ):  $\delta$  143.6, 141.9, 140.7, 131.5, 124.3, 118.4, 116.3, 107.4, 18.4; HRMS calcd for  $\text{C}_9\text{H}_{10}\text{O}$ : 134.0732; Found : 134.0730.

**Spectra data for (E)-3-(3-methylbuta-1,3-dien-1-yl)benzo[b]thiophene (2n)**

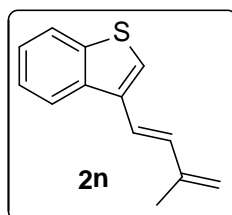

IR (neat,  $\text{cm}^{-1}$ ): 3080 (s), 1680 (s), 1490 (m), 820 (s);  $^1\text{H}$  NMR (400 MHz,  $\text{CDCl}_3$ ):  $\delta$  7.92 (d,  $J$  = 7.6 Hz, 1 H), 7.85 (d,  $J$  = 7.6 Hz, 1 H), 7.46 (s, 1 H), 7.43~7.33 (m, 2 H), 6.95 (d,  $J$  = 16.0 Hz, 1 H), 6.79 (d,  $J$  = 16.0 Hz, 1 H), 5.14 (s, 1 H), 5.09 (s, 1 H), 2.00 (s, 3 H);  $^{13}\text{C}$  NMR (100 MHz,  $\text{CDCl}_3$ ):  $\delta$  142.0, 140.4, 137.8, 134.0, 133.2, 124.4, 124.2, 122.9, 121.8, 121.4, 120.5, 117.4, 18.5; HRMS calcd for  $\text{C}_{13}\text{H}_{12}\text{S}$ :

200.0600; Found : 200.0600.

**Spectra data for (4-methylpenta-1,3-dien-2-yl)benzene (2o) and (Z)-(4-methylpenta-2,4-dien-2-yl)benzene (2o')**

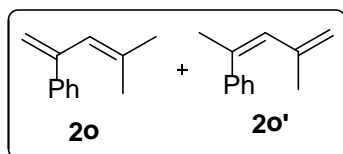

IR (neat,  $\text{cm}^{-1}$ ): 2910, 1600, 1340, 905, 730;  $^1\text{H}$  NMR (600 MHz,  $\text{CDCl}_3$ ) (2o form is major isomer): 2o isomer,  $\delta$  7.16~7.42 (m, 5 H), 5.93 (s, 1 H), 5.50 (s, 1 H), 5.05 (s, 1 H), 1.86 (s, 3 H), 1.69 (s, 3 H); 2o' isomer selected peaks,  $\delta$  6.20 (s, 1 H), 5.08 (s, 1 H), 4.92 (s, 1 H), 2.21 (s, 3 H), 1.93 (s, 1 H), the remaining peaks are overlapped;  $^{13}\text{C}$  NMR (100 MHz,  $\text{CDCl}_3$ ) (2o+2o'):  $\delta$  145.4, 144.3, 142.2, 141.4, 136.8, 136.2, 129.7, 128.2, 128.1( $\text{CH}\times 2$ ), 127.3( $\text{CH}\times 2$ ), 126.9, 126.6( $\text{CH}\times 2$ ), 125.9( $\text{CH}\times 2$ ), 125.0, 115.3, 114.3, 26.3, 23.7, 19.6, 17.5; HRMS calcd. For  $\text{C}_{12}\text{H}_{14}$ : 158.2390; Found: 158.2390.

**Spectra data for (E)-penta-1,3-diene-2,4-diylidibenzene (2p)**

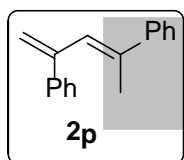

IR (neat,  $\text{cm}^{-1}$ ): 2920, 1610, 1335, 910;  $^1\text{H}$  NMR (400 MHz,  $d^2$ -DCM):  $\delta$  7.52 (d,  $J = 8.0$  Hz, 2 H), 7.93 (t,  $J = 7.6$  Hz, 2 H), 7.28~7.38 (m, 6 H), 6.56 (s, 1 H), 5.69 (s, 1 H), 5.25 (s, 1 H), 2.12 (s, 3 H);  $^{13}\text{C}$  NMR (100 MHz,  $d^2$ -DCM):  $\delta$  148.5, 143.8, 141.3, 139.3, 128.7( $\text{CH}\times 2$ ), 128.7( $\text{CH}\times 2$ ), 128.0, 127.7, 127.6, 126.9( $\text{CH}\times 2$ ), 126.3( $\text{CH}\times 2$ ), 115.6, 17.8; HRMS calcd. For  $\text{C}_{17}\text{H}_{16}$ : 220.3083; Found: 220.3083.

**Spectra data for (1-(cyclopent-1-en-1-yl)prop-1-en-2-yl)benzene (2q)**

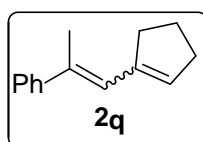

IR (neat,  $\text{cm}^{-1}$ ): 2925, 1615, 1340, 915, 730;  $^1\text{H}$  NMR (400 MHz,  $d^2$ -DCM) (*E* form is major isomer): *E* isomer,  $\delta$  7.15~7.43 (m, 5 H), 6.42 (s, 1 H), 5.80 (s, 1 H), 2.65 (t,  $J = 6.8$  Hz, 2 H), 2.43 (t,  $J = 6.8$  Hz, 2 H), 2.24 (s, 3H), 1.91~1.98 (m, 2 H); *Z* isomer selected peaks,  $\delta$  6.25 (s, 1 H), 5.58 (s, 1 H), 2.22 (t,  $J = 6.8$  Hz, 2 H), 2.07 (s, 3 H), 1.73 (t,  $J = 6.8$  Hz, 2 H), 1.61~1.67 (m, 2 H), the remaining peaks are overlapped;  $^{13}\text{C}$  NMR (100 MHz,  $d^2$ -DCM): *E* isomer, 145.1, 142.4, 135.6, 132.4, 128.6 ( $\text{CH}\times 2$ ), 127.1, 126.2 ( $\text{CH}\times 2$ ), 125.0, 35.9, 32.9, 24.4, 17.9; *Z* isomer, 143.8, 142.6, 137.5, 131.6, 128.7 ( $\text{CH}\times 2$ ), 128.0 ( $\text{CH}\times 2$ ), 127.0, 124.4, 34.1, 32.2, 27.8, 24.6; HRMS calcd. For  $\text{C}_{14}\text{H}_{18}$ : 184.2762; Found: 184.2762.

**Spectra data for 1-(hepta-1,2-dien-3-yl)-4-methoxybenzene (3a)**

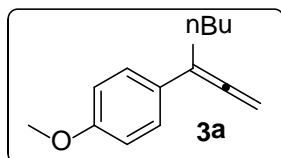

IR (neat,  $\text{cm}^{-1}$ ): 2995 (s), 1950 (s), 1690 (w), 875 (s);  $^1\text{H}$  NMR (400 MHz,  $\text{CDCl}_3$ ):  $\delta$  7.31 (d,  $J = 9.2$  Hz, 2 H), 6.85 (d,  $J = 9.2$  Hz, 2 H), 5.02~5.01 (m, 1 H), 3.79 (s, 3 H), 2.39~2.34

(m, 2H), 1.41~1.34 (m, 2 H), 0.91 (t,  $J = 7.6$  Hz, 3 H);  $^{13}\text{C}$  NMR (100 MHz,  $\text{CDCl}_3$ ):  $\delta$  208.2, 158.3, 128.6, 127.0(CH $\times$ 2), 113.7(CH $\times$ 2), 104.4, 77.9, 55.1, 30.0, 29.3, 22.5, 14.0. HRMS calcd for  $\text{C}_{14}\text{H}_{18}\text{O}$ : 202.1358; Found : 202.1356.

#### Spectra data for 2-(hepta-1,2-dien-3-yl)thiophene (3b)

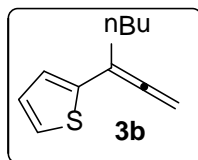

IR (neat,  $\text{cm}^{-1}$ ): 3159 (s), 1945 (s), 1650 (w), 860 (s);  $^1\text{H}$  NMR (400 MHz,  $\text{CDCl}_3$ ):  $\delta$  7.16~7.14 (m, 1 H), 6.96~6.94 (m, 1 H), 6.92~6.91 (m, 1 H), 5.08~5.06 (m, 2 H), 2.41~2.35 (m, 2 H), 1.58~1.51 (m, 2 H), 1.44~1.35 (m, 2 H), 0.92 (t,  $J = 7.2$  Hz, 3 H);  $^{13}\text{C}$  NMR (100 MHz,  $\text{CDCl}_3$ ):  $\delta$  207.7, 141.5, 127.2, 124.0, 122.7, 101.1, 78.7, 30.4, 29.9, 22.4, 13.9.; HRMS calcd for  $\text{C}_{14}\text{H}_{11}\text{S}$ : 178.0816; Found : 178.0810.

#### Spectra data for 3-(hepta-1,2-dien-3-yl)thiophene (3c)

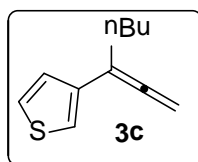

IR (neat,  $\text{cm}^{-1}$ ): 3010 (s), 1845 (s), 1670 (w), 850 (s);  $^1\text{H}$  NMR (400 MHz,  $\text{CDCl}_3$ ):  $\delta$  7.24~7.22 (m, 1 H), 7.11~7.10 (m, 1 H), 7.05~7.04 (m, 1 H), 5.02~5.00 (m, 2 H), 2.38~2.32 (m, 2 H), 1.57~1.49 (m, 2 H), 1.43~1.35 (m, 2 H), 0.92 (t,  $J = 7.2$  Hz, 3 H);  $^{13}\text{C}$  NMR (100 MHz,  $\text{CDCl}_3$ ):  $\delta$  208.8, 138.3, 126.8, 125.2, 118.5, 101.4, 77.8, 29.9(CH $_2$  $\times$ 2), 22.5, 14.0.; HRMS calcd for  $\text{C}_{14}\text{H}_{11}\text{S}$ : 178.0816; Found : 178.0814.

#### Spectra data for 1-(hexa-1,2-dien-1-yl)-4-methoxybenzene (3d)

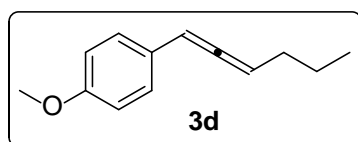

IR (neat,  $\text{cm}^{-1}$ ): 1930, 1610, 3015, 2940;  $^1\text{H}$  NMR (400 MHz,  $\text{CDCl}_3$ ):  $\delta$  7.20 (d,  $J = 7.6$  Hz, 2 H), 6.85 (d,  $J = 7.2$  Hz, 2 H), 6.05~6.10 (m, 1 H), 5.50~5.57 (m, 1 H), 2.05~2.11 (m, 2 H), 1.44~1.52 (m, 2 H), 0.95 (t,  $J = 7.6$  Hz, 3 H);  $^{13}\text{C}$  NMR (100 MHz,  $\text{CDCl}_3$ ): 204.5, 158.5, 127.6, 127.4, 114.0, 94.8, 93.9, 55.1, 30.8, 22.4, 13.7; HRMS calcd. For  $\text{C}_{11}\text{H}_{12}\text{O}$ : 160.2119; Found: 160.2119.

#### Spectra data for 1-(hepta-1,3-dien-3-yl)-4-methoxybenzene (4a)

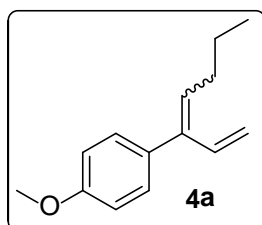

IR (neat,  $\text{cm}^{-1}$ ): 3000 (s), 1650 (s), 1405 (s), 780 (s);  $^1\text{H}$  NMR (400 MHz,  $\text{CDCl}_3$ ): (*E* form is major isomer):  $\delta$  7.19 (d,  $J = 8.4$  Hz, 2 H), 6.84 (d,  $J = 8.4$  Hz, 2 H), 6.86~6.79 (m, 1 H), 5.50 (t,  $J = 7.6$  Hz, 1 H), 5.19 (dt,  $J = 10.8, 2.0$  Hz, 1 H), 5.05 (dd,  $J = 19.2, 1.6$  Hz, 1 H), 3.80 (s, 3 H), 2.43 (ABq, 2 H,  $\Delta_{\text{AB}}=12.9$  Hz,  $J_{\text{AB}}=7.2$  Hz), 1.51~1.42 (m, 2 H), 0.94 (t,  $J = 7.2$  Hz, 3 H); (*Z* form):  $\delta$  7.02 (d,  $J = 8.4$  Hz, 2 H), 6.89 (d,  $J = 8.4$  Hz, 2 H), 6.56~6.49 (m, 1 H), 5.68 (t,  $J = 7.6$  Hz, 1 H), 4.95 (d,  $J = 10.4$  Hz, 1 H), 4.67 (d,  $J = 17.2$  Hz, 1 H), 3.81 (s, 3 H), 1.91 (ABq, 2 H,  $\Delta_{\text{AB}}=12.9$  Hz,  $J_{\text{AB}}=7.2$  Hz), 1.37~1.31 (m, 2 H), 0.82 (t,  $J = 7.2$  Hz, 3 H).

H);  $^{13}\text{C}$  NMR (100 MHz,  $\text{CDCl}_3$ ): (*E* form is major isomer):  $\delta$  158.5, 141.0, 134.1, 133.5, 132.4, 129.8, 116.9, 113.3, 55.2, 30.1, 22.9, 13.8.; (*Z* form):  $\delta$  158.3, 141.1, 134.1, 130.6, 113.4, 55.1, 31.1, 22.8, 13.9, the remaining peaks are overlapped.; HRMS calcd for  $\text{C}_{14}\text{H}_{18}\text{O}$ : 202.1358; Found : 202.13568.

#### Spectra data for 2-(octa-1,3-dien-3-yl)thiophene (4b)

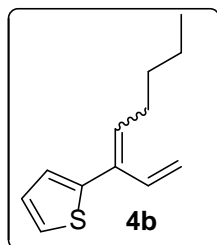

IR (neat,  $\text{cm}^{-1}$ ): 3105 (s), 1680 (s), 950 (s), 720 (s);  $^1\text{H}$  NMR (400 MHz,  $\text{CDCl}_3$ ): (*E* form is major isomer):  $\delta$  7.16 (dd,  $J = 4.8, 1.2$  Hz, 1 H), 6.98~6.94 (m, 1 H), 6.78~6.71 (m, 1 H), 5.81 (t,  $J = 7.2$  Hz, 1 H), 5.39 (dd,  $J = 17.6, 1.1$  Hz, 1 H), 5.30 (dt,  $J = 11.2, 1.2$  Hz, 1 H), 2.25 (ABq, 2 H,  $\Delta_{\text{AB}}=12.9$  Hz,  $J_{\text{AB}}=7.2$  Hz), 1.52~1.43 (m, 2 H), 0.94 (t,  $J = 7.2$  Hz, 3 H); (*Z* form):  $\delta$  7.63 (dd,  $J = 5.2, 1.2$  Hz, 1 H), 7.05~7.03 (m, 1 H), 6.83~6.82 (m, 1 H), 6.57~6.50 (m, 1 H), 5.83 (t,  $J = 7.6$  Hz, 1 H), 5.02 (d,  $J = 10.4$  Hz, 1 H), 4.95 (d,  $J = 17.2$  Hz, 1 H), 2.01 (ABq, 2 H,  $\Delta_{\text{AB}}=12.9$  Hz,  $J_{\text{AB}}=7.2$  Hz), 1.42~1.36 (m, 2 H), 0.86 (t,  $J = 7.2$  Hz, 3 H);  $^{13}\text{C}$  NMR (100 MHz,  $\text{CDCl}_3$ ): (*E* form is major isomer):  $\delta$  143.9, 133.3, 132.8, 132.5, 126.8, 124.9, 123.6, 117.9, 30.4, 22.7, 13.8.; (*Z* form):  $\delta$  140.4, 137.0, 126.9, 126.6, 125.0, 114.4, 31.4, 14.0, the remaining peaks are overlapped.; HRMS calcd for  $\text{C}_{14}\text{H}_{11}\text{S}$ : 178.0816; Found : 178.0816.

#### Spectra data for 3-(octa-1,3-dien-3-yl)thiophene (4c)

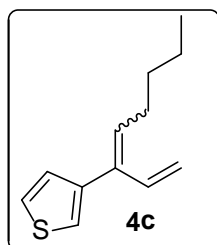

IR (neat,  $\text{cm}^{-1}$ ): 3050 (s), 1710 (s), 990 (s), 730 (s);  $^1\text{H}$  NMR (400 MHz,  $\text{CDCl}_3$ ): (*E* form is major isomer):  $\delta$  7.24 (d,  $J = 12.0$  Hz, 1 H), 7.11 (d,  $J = 2.4$  Hz, 1 H), 7.06 (d,  $J = 5.2$  Hz, 1 H), 6.82~6.75 (m, 1 H), 5.68 (t,  $J = 7.6$  Hz, 1 H), 5.25~5.18 (m, 2 H), 2.25 (ABq, 2 H,  $\Delta_{\text{AB}}=12.9$  Hz,  $J_{\text{AB}}=7.2$  Hz), 1.51~1.42 (m, 2 H), 0.94 (t,  $J = 7.6$  Hz, 3 H); (*Z* form):  $\delta$  7.31~7.29 (m, 1 H), 7.02 (m, 1 H), 6.90 (m, 1 H), 6.55~6.48 (m, 1 H), 5.71 (t,  $J = 7.6$  Hz, 1 H), 4.97 (d,  $J = 10.8$  Hz, 1 H), 4.80 (d,  $J = 16.8$  Hz, 1 H), 1.98 (ABq, 2 H,  $\Delta_{\text{AB}}=12.9$  Hz,  $J_{\text{AB}}=7.2$  Hz), 1.39~1.34 (m, 2 H), 0.84 (t,  $J = 7.6$  Hz, 3 H);  $^{13}\text{C}$  NMR (100 MHz,  $\text{CDCl}_3$ ): (*E* form is major isomer):  $\delta$  142.3, 135.1, 133.1, 132.5, 128.1, 124.6, 121.7, 117.0, 30.1, 22.8, 13.9.; (*Z* form):  $\delta$  140.5, 134.4, 129.1, 123.1, 113.9, 31.2, the remaining peaks are overlapped.; HRMS calcd for  $\text{C}_{14}\text{H}_{11}\text{S}$ : 178.0816; Found : 178.0815.

#### Spectra data for

#### (3aR,7aS)-6-methyl-4-phenyl-3a,4,7,7a-tetrahydroisobenzofuran-1,3-dione (5a)

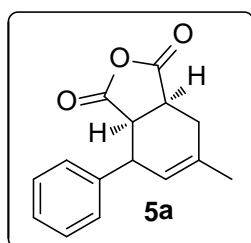

IR (neat,  $\text{cm}^{-1}$ ): 3010 (s), 1840 (s), 1350 (s), 1100 (s);  $^1\text{H}$  NMR (400 MHz,  $\text{CDCl}_3$ ):  $\delta$  7.35~7.28 (m, 3 H), 7.17 (d,  $J = 8.0$

Hz, 2 H), 5.86 (br, 1 H), 3.74 (br, 1 H), 3.51~3.47 (m, 2 H), 2.76 (d,  $J = 13.6$  Hz, 1 H), 2.41~2.36 (m, 1 H), 1.88 (s, 3 H);  $^{13}\text{C}$  NMR (100 MHz,  $\text{CDCl}_3$ ):  $\delta$  173.8, 170.7, 138.1, 136.7, 128.7(CH $\times$ 2), 128.5(CH $\times$ 2), 127.7, 123.1, 45.9, 41.0, 40.0, 27.5, 23.5.; HRMS calcd for  $\text{C}_{15}\text{H}_{14}\text{O}_3$ : 242.0943; Found : 242.0942.

#### Spectra data for

##### (3aR,7aS)-2,6-dimethyl-4-phenyl-3a,4,7,7a-tetrahydro-1H-isoindole-1,3(2H)-dione (5b)

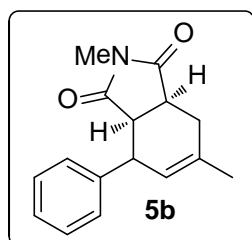

IR (neat,  $\text{cm}^{-1}$ ): 30303 (s), 1760 (s), 1710 (s), 1050 (s);  $^1\text{H}$  NMR (400 MHz,  $\text{CDCl}_3$ ):  $\delta$  7.29~7.21 (m, 3 H), 7.12 (d,  $J = 8.4$  Hz, 2 H), 5.80~5.79 (m, 1 H), 3.72 (br, 1 H), 3.27~3.23 (m, 1 H), 3.16 (td,  $J = 8.8, 2.4$  Hz, 1 H), 2.77 (dd,  $J = 16.8, 2.4$  Hz, 1 H), 2.37~2.31 (m, 1 H), 1.83 (s, 3 H);  $^{13}\text{C}$  NMR (100 MHz,  $\text{CDCl}_3$ ):  $\delta$  179.3, 177.2, 139.2, 135.8, 128.6(CH $\times$ 2), 127.9(CH $\times$ 2), 126.8, 122.8, 45.1, 41.4, 38.9, 27.3, 24.0, 23.3.; HRMS calcd for  $\text{C}_{16}\text{H}_{17}\text{NO}_2$ : 222.1259; Found : 255.1257.

#### Spectra data for

##### (3aR,7aS)-6-methyl-2,4-diphenyl-3a,4,7,7a-tetrahydro-1H-isoindole-1,3(2H)-dione (5c)

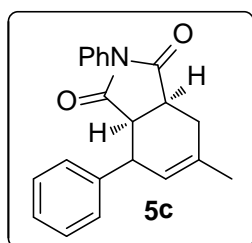

IR (neat,  $\text{cm}^{-1}$ ): 3070 (s), 3020 (s), 1790 (s), 1070 ;  $^1\text{H}$  NMR (400 MHz,  $\text{CDCl}_3$ ):  $\delta$  7.28~7.23 (m, 6 H), 7.15 (d,  $J = 8.0$  Hz, 2 H), 6.59 (d,  $J = 8.0$  Hz, 2 H), 5.85~5.83 (m, 1 H), 3.92~3.89 (m, 1 H), 3.42~3.34 (m, 2 H), 2.91 (d,  $J = 18.4$  Hz, 1 H), 2.50~2.43 (m, 1 H), 1.89 (s, 3 H);  $^{13}\text{C}$  NMR (100 MHz,  $\text{CDCl}_3$ ):  $\delta$  178.5, 176.5, 139.0, 135.0, 131.4, 129.1(CH $\times$ 2), 128.7(CH $\times$ 2), 128.3(CH $\times$ 2), 128.2, 127.2, 126.1(CH $\times$ 2), 122.7, 44.5, 41.4, 38.6, 26.5, 23.4.; HRMS calcd for  $\text{C}_{21}\text{H}_{19}\text{NO}_2$ : 317.1416; Found : 317.1416.

#### Spectra data for 7-methyl-5-phenylnaphthalene-1,4(5H,8H)-dione (5d)

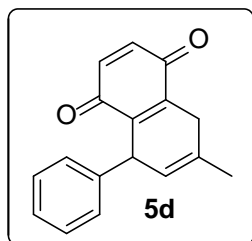

IR (neat,  $\text{cm}^{-1}$ ): 3030 (w), 3010 (s), 1690 (s), 1150 (s);  $^1\text{H}$  NMR (400 MHz,  $\text{CDCl}_3$ ):  $\delta$  7.26~7.16 (m, 5 H), 6.70 (d,  $J = 10.4$  Hz, 1 H), 6.60 (d,  $J = 10.4$  Hz, 1 H), 5.58~5.57 (m, 1 H), 4.58~4.56 (m, 1 H), 3.12~3.09 (m, 2 H), 1.81 (s, 3 H);  $^{13}\text{C}$  NMR (100 MHz,  $\text{CDCl}_3$ ):  $\delta$  187.3, 186.1, 142.9, 141.8, 139.2, 136.6, 135.9, 128.9, 128.5(CH $\times$ 2), 128.3(CH $\times$ 2), 126.8, 122.9, 41.5, 28.9, 22.7.; HRMS calcd for  $\text{C}_{17}\text{H}_{14}\text{O}_2$ : 250.0994; Found : 250.0992.

#### Spectra data for

**4-phenyl-3a,4,7,8,9,9a-hexahydronaphtho[1,2-c]furan-1,3(6H,9bH)-dione (5e)**

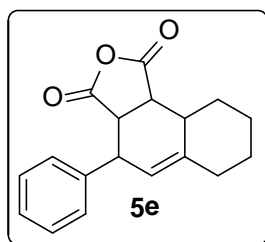

IR (neat,  $\text{cm}^{-1}$ ): 3020 (s), 1800 (s), 1310 (s), 1000 (s);  $^1\text{H}$  NMR (400 MHz,  $\text{CDCl}_3$ ):  $\delta$  7.33~7.26 (m, 3 H), 7.21~7.19 (m, 2 H), 6.66~6.65 (m, 1 H), 3.85~3.82 (m, 1 H), 3.48 (t,  $J$  = 8.0 Hz, 1 H), 3.39 (t,  $J$  = 8.0 Hz, 1 H), 2.58 (br, 1 H), 2.42~2.38 (m, 1 H), 2.29~2.26 (m, 1 H), 2.15~2.08 (m, 1 H), 2.00~1.90 (m, 2 H), 1.85~1.80 (m, 1 H), 1.50~1.45 (m, 1 H);  $^{13}\text{C}$  NMR (100 MHz,  $\text{CDCl}_3$ ):  $\delta$  170.6, 170.5, 141.1, 137.8, 129.1( $\text{CH}\times 2$ ), 128.5( $\text{CH}\times 2$ ), 128.0, 119.0, 45.7, 42.1, 39.5, 34.5, 29.5, 26.2, 25.9; HRMS calcd for  $\text{C}_{18}\text{H}_{18}\text{O}_3$ : 282.1256; Found : 282.1256.

**Spectra data for**

**2,4-diphenyl-3a,4,6,7,8,9,9a,9b-octahydro-1H-benzo[e]isoindole-1,3(2H)-dione (5f)**

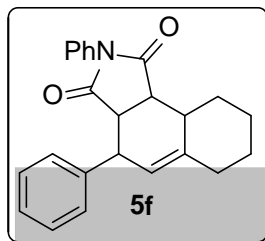

IR (neat,  $\text{cm}^{-1}$ ): 3100 (s), 3010 (s), 1820 (s), 1150 (s);  $^1\text{H}$  NMR (400 MHz,  $\text{CDCl}_3$ ):  $\delta$  7.29~7.23 (m, 5 H), 7.22~7.19 (m, 3 H), 6.40~6.37 (m, 2 H), 5.65~5.64 (m, 1 H), 3.94~3.91 (m, 1 H), 3.44~3.34 (m, 2 H), 2.72~2.67 (m, 1 H), 2.62~2.59 (m, 1 H), 2.42~2.38 (m, 1 H), 2.15~2.10 (m, 1 H), 2.01~1.92 (m, 2 H), 1.86~1.83 (m, 1 H), 1.51~1.44 (m, 2 H);  $^{13}\text{C}$  NMR (100 MHz,  $\text{CDCl}_3$ ):  $\delta$  176.2, 176.0, 140.8, 138.8, 131.2, 129.7( $\text{CH}\times 2$ ), 128.6( $\text{CH}\times 2$ ), 128.3( $\text{CH}\times 2$ ), 128.1, 127.3, 126.3( $\text{CH}\times 2$ ), 119.1, 44.8, 40.9, 40.6, 36.1, 35.2, 30.3, 27.0, 26.6; HRMS calcd for  $\text{C}_{24}\text{H}_{23}\text{NO}_2$ : 357.1729; Found : 357.1729.

**Spectra data for 4-methyl-2,6-diphenyl-3,6-dihydro-2H-1,2-oxazine (6)**

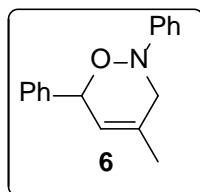

IR (neat,  $\text{cm}^{-1}$ ): 3050 (s), 1350 (s), 1075 (s), 1050 (s);  $^1\text{H}$  NMR (400 MHz,  $\text{CDCl}_3$ ):  $\delta$  7.44 (d,  $J$  = 6.4 Hz, 2 H), 7.37~7.23 (m, 5 H), 7.10 (d,  $J$  = 7.6 Hz, 2 H), 6.95 (t,  $J$  = 7.6 Hz, 1 H), 5.75~5.74 (m, 1 H), 5.53~5.20 (m, 1 H), 3.82~3.72 (m, 2 H), 1.88 (s, 3 H);  $^{13}\text{C}$  NMR (100 MHz,  $\text{CDCl}_3$ ):  $\delta$  150.2, 139.5, 131.5( $\text{CH}\times 2$ ), 128.3( $\text{CH}\times 2$ ), 128.2, 128.0( $\text{CH}\times 2$ ), 122.9, 122.1, 115.8( $\text{CH}\times 2$ ), 79.2, 55.3, 20.3; HRMS calcd for  $\text{C}_{17}\text{H}_{17}\text{NO}$ : 251.1310; Found : 251.1310.

**(d) X-Ray data for compound (5c)**

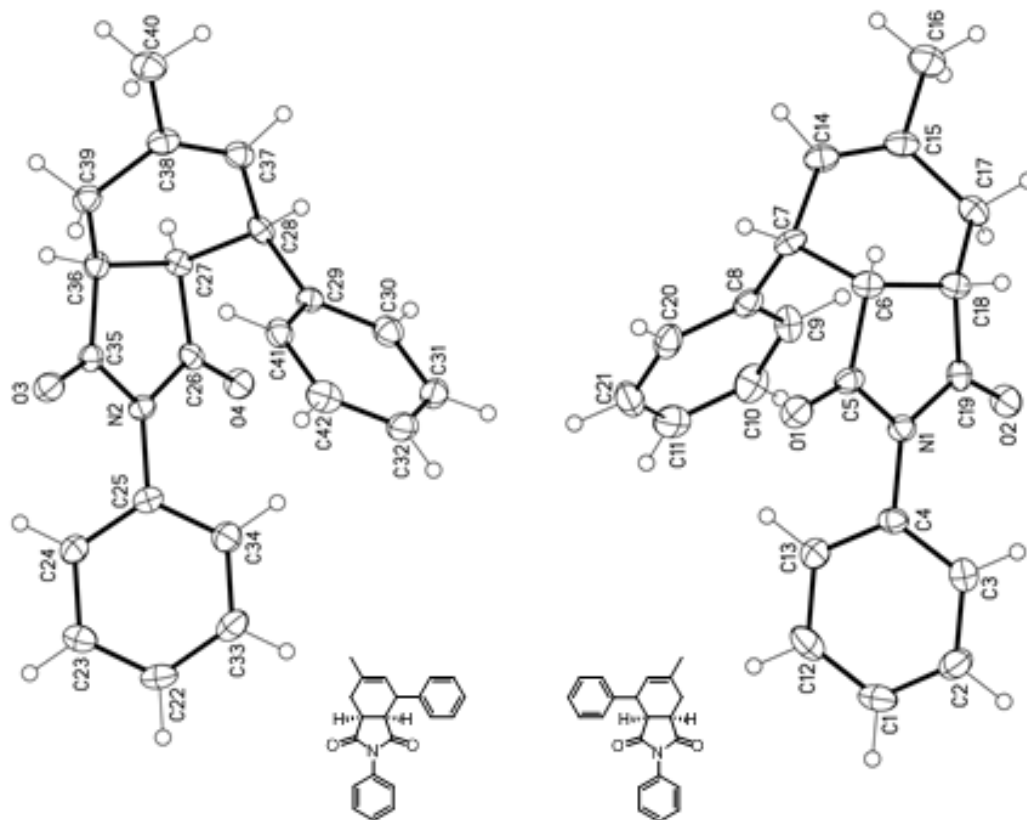

Table 1. Crystal data and structure refinement for twin5.

|                                 |                                      |                             |
|---------------------------------|--------------------------------------|-----------------------------|
| Identification code             | twin5                                |                             |
| Empirical formula               | C42 H38 N2 O4                        |                             |
| Formula weight                  | 634.74                               |                             |
| Temperature                     | 100(2) K                             |                             |
| Wavelength                      | 0.71073 Å                            |                             |
| Crystal system                  | Monoclinic                           |                             |
| Space group                     | P 1 21 1                             |                             |
| Unit cell dimensions            | a = 9.7876(18) Å                     | $\alpha = 90^\circ$ .       |
|                                 | b = 8.3007(14) Å                     | $\beta = 94.442(4)^\circ$ . |
|                                 | c = 19.986(4) Å                      | $\gamma = 90^\circ$ .       |
| Volume                          | 1618.8(5) Å <sup>3</sup>             |                             |
| Z                               | 2                                    |                             |
| Density (calculated)            | 1.302 Mg/m <sup>3</sup>              |                             |
| Absorption coefficient          | 0.084 mm <sup>-1</sup>               |                             |
| F(000)                          | 672                                  |                             |
| Crystal size                    | 0.28 x 0.25 x 0.22 mm <sup>3</sup>   |                             |
| Theta range for data collection | 2.04 to 26.54°.                      |                             |
| Index ranges                    | -12 ≤ h ≤ 12, 0 ≤ k ≤ 10, 0 ≤ l ≤ 25 |                             |

|                                   |                                             |
|-----------------------------------|---------------------------------------------|
| Reflections collected             | 3637                                        |
| Independent reflections           | 3637 [R(int) = 0.0399]                      |
| Completeness to theta = 26.54°    | 99.2 %                                      |
| Absorption correction             | Semi-empirical from equivalents             |
| Max. and min. transmission        | 0.7454 and 0.6525                           |
| Refinement method                 | Full-matrix least-squares on F <sup>2</sup> |
| Data / restraints / parameters    | 3637 / 1 / 436                              |
| Goodness-of-fit on F <sup>2</sup> | 1.031                                       |
| Final R indices [I>2sigma(I)]     | R1 = 0.0337, wR2 = 0.0704                   |
| R indices (all data)              | R1 = 0.0395, wR2 = 0.0727                   |
| Absolute structure parameter      | 0.5(14)                                     |
| Largest diff. peak and hole       | 0.153 and -0.179 e.Å <sup>-3</sup>          |

Table 2. Atomic coordinates ( $\times 10^4$ ) and equivalent isotropic displacement parameters ( $\text{\AA}^2 \times 10^3$ ) for twin5.  $U(\text{eq})$  is defined as one third of the trace of the orthogonalized  $U^{ij}$  tensor.

|       | x        | y       | z        | U(eq) |
|-------|----------|---------|----------|-------|
| O(1)  | 7386(2)  | 7205(3) | 3743(1)  | 23(1) |
| O(2)  | 10339(2) | 4223(3) | 5121(1)  | 24(1) |
| O(3)  | 5247(2)  | 8757(3) | -215(1)  | 22(1) |
| O(4)  | 2790(2)  | 5834(3) | 1207(1)  | 21(1) |
| N(1)  | 8612(2)  | 5640(3) | 4534(1)  | 18(1) |
| N(2)  | 3728(2)  | 7349(3) | 391(1)   | 16(1) |
| C(1)  | 5374(3)  | 3924(4) | 5602(2)  | 27(1) |
| C(2)  | 6402(3)  | 4834(4) | 5921(2)  | 27(1) |
| C(3)  | 7467(3)  | 5424(4) | 5570(1)  | 23(1) |
| C(4)  | 7497(3)  | 5067(4) | 4895(1)  | 18(1) |
| C(5)  | 8451(3)  | 6604(4) | 3962(1)  | 19(1) |
| C(6)  | 9826(3)  | 6677(4) | 3662(1)  | 19(1) |
| C(7)  | 9791(3)  | 5607(4) | 3019(1)  | 20(1) |
| C(8)  | 8929(3)  | 4087(4) | 3059(1)  | 20(1) |
| C(9)  | 9374(3)  | 2763(4) | 3448(1)  | 24(1) |
| C(10) | 8539(3)  | 1443(4) | 3509(2)  | 28(1) |
| C(11) | 7253(3)  | 1388(5) | 3170(2)  | 30(1) |
| C(12) | 5413(3)  | 3574(4) | 4926(2)  | 29(1) |
| C(13) | 6480(3)  | 4139(4) | 4570(1)  | 25(1) |
| C(14) | 11245(3) | 5231(4) | 2864(1)  | 22(1) |
| C(15) | 12288(3) | 5051(4) | 3319(1)  | 21(1) |
| C(16) | 13695(3) | 4560(4) | 3135(2)  | 29(1) |
| C(17) | 12151(3) | 5266(4) | 4061(1)  | 22(1) |
| C(18) | 10839(3) | 6117(4) | 4238(1)  | 19(1) |
| C(19) | 9968(3)  | 5180(4) | 4684(1)  | 18(1) |
| C(20) | 7644(3)  | 4002(5) | 2717(1)  | 25(1) |
| C(21) | 6822(3)  | 2661(4) | 2766(2)  | 29(1) |
| C(22) | 202(3)   | 9178(4) | -678(2)  | 25(1) |
| C(23) | 1145(3)  | 8294(4) | -1009(1) | 24(1) |
| C(24) | 2305(3)  | 7670(4) | -656(1)  | 21(1) |
| C(25) | 2502(3)  | 7933(4) | 28(1)    | 17(1) |
| C(26) | 3775(3)  | 6420(4) | 972(1)   | 16(1) |
| C(27) | 5251(3)  | 6394(4) | 1268(1)  | 16(1) |

|       |         |          |         |       |
|-------|---------|----------|---------|-------|
| C(28) | 5391(3) | 7487(4)  | 1903(1) | 18(1) |
| C(29) | 4410(3) | 8928(4)  | 1879(1) | 18(1) |
| C(30) | 3295(3) | 8930(4)  | 2271(1) | 22(1) |
| C(31) | 2404(3) | 10234(4) | 2264(1) | 25(1) |
| C(32) | 2588(3) | 11538(4) | 1854(2) | 26(1) |
| C(33) | 423(3)  | 9437(4)  | 8(2)    | 25(1) |
| C(34) | 1569(3) | 8811(4)  | 360(1)  | 22(1) |
| C(35) | 5029(3) | 7818(4)  | 230(1)  | 16(1) |
| C(36) | 6071(3) | 6946(4)  | 686(1)  | 17(1) |
| C(37) | 6851(3) | 8050(4)  | 2036(1) | 19(1) |
| C(38) | 7742(3) | 8247(4)  | 1574(2) | 20(1) |
| C(39) | 7413(3) | 7868(4)  | 849(1)  | 19(1) |
| C(40) | 9169(3) | 8881(4)  | 1753(2) | 26(1) |
| C(41) | 4592(3) | 10271(4) | 1474(1) | 20(1) |
| C(42) | 3688(3) | 11553(4) | 1455(2) | 26(1) |

---

Table 3. Bond lengths [Å] and angles [°] for twin5.

|             |          |
|-------------|----------|
| O(1)-C(5)   | 1.207(3) |
| O(2)-C(19)  | 1.215(3) |
| O(3)-C(35)  | 1.213(3) |
| O(4)-C(26)  | 1.207(3) |
| N(1)-C(19)  | 1.392(4) |
| N(1)-C(5)   | 1.394(4) |
| N(1)-C(4)   | 1.436(3) |
| N(2)-C(35)  | 1.393(4) |
| N(2)-C(26)  | 1.393(4) |
| N(2)-C(25)  | 1.437(3) |
| C(1)-C(2)   | 1.375(5) |
| C(1)-C(12)  | 1.385(4) |
| C(1)-H(1)   | 0.9500   |
| C(2)-C(3)   | 1.390(4) |
| C(2)-H(2)   | 0.9500   |
| C(3)-C(4)   | 1.383(4) |
| C(3)-H(3)   | 0.9500   |
| C(4)-C(13)  | 1.381(4) |
| C(5)-C(6)   | 1.516(4) |
| C(6)-C(18)  | 1.533(4) |
| C(6)-C(7)   | 1.561(4) |
| C(6)-H(6)   | 1.0000   |
| C(7)-C(14)  | 1.513(4) |
| C(7)-C(8)   | 1.523(4) |
| C(7)-H(7)   | 1.0000   |
| C(8)-C(20)  | 1.387(4) |
| C(8)-C(9)   | 1.396(4) |
| C(9)-C(10)  | 1.378(4) |
| C(9)-H(9)   | 0.9500   |
| C(10)-C(11) | 1.384(4) |
| C(10)-H(10) | 0.9500   |
| C(11)-C(21) | 1.377(5) |
| C(11)-H(11) | 0.9500   |
| C(12)-C(13) | 1.390(4) |
| C(12)-H(12) | 0.9500   |
| C(13)-H(13) | 0.9500   |

|              |          |
|--------------|----------|
| C(14)-C(15)  | 1.323(4) |
| C(14)-H(14)  | 0.9500   |
| C(15)-C(16)  | 1.508(4) |
| C(15)-C(17)  | 1.509(4) |
| C(16)-H(16A) | 0.9800   |
| C(16)-H(16B) | 0.9800   |
| C(16)-H(16C) | 0.9800   |
| C(17)-C(18)  | 1.531(4) |
| C(17)-H(17A) | 0.9900   |
| C(17)-H(17B) | 0.9900   |
| C(18)-C(19)  | 1.499(4) |
| C(18)-H(18)  | 1.0000   |
| C(20)-C(21)  | 1.381(5) |
| C(20)-H(20)  | 0.9500   |
| C(21)-H(21)  | 0.9500   |
| C(22)-C(23)  | 1.386(4) |
| C(22)-C(33)  | 1.389(4) |
| C(22)-H(22)  | 0.9500   |
| C(23)-C(24)  | 1.390(4) |
| C(23)-H(23)  | 0.9500   |
| C(24)-C(25)  | 1.384(4) |
| C(24)-H(24)  | 0.9500   |
| C(25)-C(34)  | 1.377(4) |
| C(26)-C(27)  | 1.518(4) |
| C(27)-C(36)  | 1.535(4) |
| C(27)-C(28)  | 1.557(4) |
| C(27)-H(27)  | 1.0000   |
| C(28)-C(37)  | 1.508(4) |
| C(28)-C(29)  | 1.532(4) |
| C(28)-H(28)  | 1.0000   |
| C(29)-C(30)  | 1.392(4) |
| C(29)-C(41)  | 1.397(4) |
| C(30)-C(31)  | 1.389(4) |
| C(30)-H(30)  | 0.9500   |
| C(31)-C(32)  | 1.377(5) |
| C(31)-H(31)  | 0.9500   |
| C(32)-C(42)  | 1.389(4) |
| C(32)-H(32)  | 0.9500   |

|              |          |
|--------------|----------|
| C(33)-C(34)  | 1.378(4) |
| C(33)-H(33)  | 0.9500   |
| C(34)-H(34)  | 0.9500   |
| C(35)-C(36)  | 1.500(4) |
| C(36)-C(39)  | 1.533(4) |
| C(36)-H(36)  | 1.0000   |
| C(37)-C(38)  | 1.327(4) |
| C(37)-H(37)  | 0.9500   |
| C(38)-C(39)  | 1.493(4) |
| C(38)-C(40)  | 1.510(4) |
| C(39)-H(39A) | 0.9900   |
| C(39)-H(39B) | 0.9900   |
| C(40)-H(40A) | 0.9800   |
| C(40)-H(40B) | 0.9800   |
| C(40)-H(40C) | 0.9800   |
| C(41)-C(42)  | 1.382(4) |
| C(41)-H(41)  | 0.9500   |
| C(42)-H(42)  | 0.9500   |

|                  |          |
|------------------|----------|
| C(19)-N(1)-C(5)  | 112.3(2) |
| C(19)-N(1)-C(4)  | 123.4(2) |
| C(5)-N(1)-C(4)   | 124.1(2) |
| C(35)-N(2)-C(26) | 112.0(2) |
| C(35)-N(2)-C(25) | 122.2(2) |
| C(26)-N(2)-C(25) | 125.4(2) |
| C(2)-C(1)-C(12)  | 119.6(3) |
| C(2)-C(1)-H(1)   | 120.2    |
| C(12)-C(1)-H(1)  | 120.2    |
| C(1)-C(2)-C(3)   | 120.7(3) |
| C(1)-C(2)-H(2)   | 119.7    |
| C(3)-C(2)-H(2)   | 119.7    |
| C(4)-C(3)-C(2)   | 119.3(3) |
| C(4)-C(3)-H(3)   | 120.3    |
| C(2)-C(3)-H(3)   | 120.3    |
| C(13)-C(4)-C(3)  | 120.6(3) |
| C(13)-C(4)-N(1)  | 119.7(2) |
| C(3)-C(4)-N(1)   | 119.6(3) |
| O(1)-C(5)-N(1)   | 125.0(3) |

|                   |          |
|-------------------|----------|
| O(1)-C(5)-C(6)    | 127.5(3) |
| N(1)-C(5)-C(6)    | 107.5(2) |
| C(5)-C(6)-C(18)   | 103.5(2) |
| C(5)-C(6)-C(7)    | 109.8(2) |
| C(18)-C(6)-C(7)   | 114.7(2) |
| C(5)-C(6)-H(6)    | 109.6    |
| C(18)-C(6)-H(6)   | 109.6    |
| C(7)-C(6)-H(6)    | 109.6    |
| C(14)-C(7)-C(8)   | 111.9(2) |
| C(14)-C(7)-C(6)   | 109.0(2) |
| C(8)-C(7)-C(6)    | 113.9(2) |
| C(14)-C(7)-H(7)   | 107.2    |
| C(8)-C(7)-H(7)    | 107.2    |
| C(6)-C(7)-H(7)    | 107.2    |
| C(20)-C(8)-C(9)   | 117.8(3) |
| C(20)-C(8)-C(7)   | 120.0(3) |
| C(9)-C(8)-C(7)    | 122.1(2) |
| C(10)-C(9)-C(8)   | 121.0(3) |
| C(10)-C(9)-H(9)   | 119.5    |
| C(8)-C(9)-H(9)    | 119.5    |
| C(9)-C(10)-C(11)  | 120.4(3) |
| C(9)-C(10)-H(10)  | 119.8    |
| C(11)-C(10)-H(10) | 119.8    |
| C(21)-C(11)-C(10) | 119.2(3) |
| C(21)-C(11)-H(11) | 120.4    |
| C(10)-C(11)-H(11) | 120.4    |
| C(1)-C(12)-C(13)  | 120.4(3) |
| C(1)-C(12)-H(12)  | 119.8    |
| C(13)-C(12)-H(12) | 119.8    |
| C(4)-C(13)-C(12)  | 119.3(3) |
| C(4)-C(13)-H(13)  | 120.3    |
| C(12)-C(13)-H(13) | 120.3    |
| C(15)-C(14)-C(7)  | 124.8(3) |
| C(15)-C(14)-H(14) | 117.6    |
| C(7)-C(14)-H(14)  | 117.6    |
| C(14)-C(15)-C(16) | 122.2(3) |
| C(14)-C(15)-C(17) | 122.7(2) |
| C(16)-C(15)-C(17) | 115.1(2) |

|                     |          |
|---------------------|----------|
| C(15)-C(16)-H(16A)  | 109.5    |
| C(15)-C(16)-H(16B)  | 109.5    |
| H(16A)-C(16)-H(16B) | 109.5    |
| C(15)-C(16)-H(16C)  | 109.5    |
| H(16A)-C(16)-H(16C) | 109.5    |
| H(16B)-C(16)-H(16C) | 109.5    |
| C(15)-C(17)-C(18)   | 114.9(2) |
| C(15)-C(17)-H(17A)  | 108.5    |
| C(18)-C(17)-H(17A)  | 108.5    |
| C(15)-C(17)-H(17B)  | 108.5    |
| C(18)-C(17)-H(17B)  | 108.5    |
| H(17A)-C(17)-H(17B) | 107.5    |
| C(19)-C(18)-C(17)   | 115.1(2) |
| C(19)-C(18)-C(6)    | 103.9(2) |
| C(17)-C(18)-C(6)    | 118.1(2) |
| C(19)-C(18)-H(18)   | 106.3    |
| C(17)-C(18)-H(18)   | 106.3    |
| C(6)-C(18)-H(18)    | 106.3    |
| O(2)-C(19)-N(1)     | 124.2(3) |
| O(2)-C(19)-C(18)    | 127.9(2) |
| N(1)-C(19)-C(18)    | 107.8(2) |
| C(21)-C(20)-C(8)    | 121.2(3) |
| C(21)-C(20)-H(20)   | 119.4    |
| C(8)-C(20)-H(20)    | 119.4    |
| C(11)-C(21)-C(20)   | 120.4(3) |
| C(11)-C(21)-H(21)   | 119.8    |
| C(20)-C(21)-H(21)   | 119.8    |
| C(23)-C(22)-C(33)   | 119.6(3) |
| C(23)-C(22)-H(22)   | 120.2    |
| C(33)-C(22)-H(22)   | 120.2    |
| C(22)-C(23)-C(24)   | 120.2(3) |
| C(22)-C(23)-H(23)   | 119.9    |
| C(24)-C(23)-H(23)   | 119.9    |
| C(25)-C(24)-C(23)   | 119.2(3) |
| C(25)-C(24)-H(24)   | 120.4    |
| C(23)-C(24)-H(24)   | 120.4    |
| C(34)-C(25)-C(24)   | 120.8(3) |
| C(34)-C(25)-N(2)    | 119.7(2) |

|                   |          |
|-------------------|----------|
| C(24)-C(25)-N(2)  | 119.4(2) |
| O(4)-C(26)-N(2)   | 124.9(2) |
| O(4)-C(26)-C(27)  | 127.4(2) |
| N(2)-C(26)-C(27)  | 107.6(2) |
| C(26)-C(27)-C(36) | 103.8(2) |
| C(26)-C(27)-C(28) | 109.3(2) |
| C(36)-C(27)-C(28) | 115.2(2) |
| C(26)-C(27)-H(27) | 109.5    |
| C(36)-C(27)-H(27) | 109.5    |
| C(28)-C(27)-H(27) | 109.5    |
| C(37)-C(28)-C(29) | 110.3(2) |
| C(37)-C(28)-C(27) | 110.3(2) |
| C(29)-C(28)-C(27) | 114.5(2) |
| C(37)-C(28)-H(28) | 107.1    |
| C(29)-C(28)-H(28) | 107.1    |
| C(27)-C(28)-H(28) | 107.1    |
| C(30)-C(29)-C(41) | 117.7(3) |
| C(30)-C(29)-C(28) | 120.0(3) |
| C(41)-C(29)-C(28) | 122.3(2) |
| C(31)-C(30)-C(29) | 120.9(3) |
| C(31)-C(30)-H(30) | 119.5    |
| C(29)-C(30)-H(30) | 119.5    |
| C(32)-C(31)-C(30) | 120.5(3) |
| C(32)-C(31)-H(31) | 119.7    |
| C(30)-C(31)-H(31) | 119.7    |
| C(31)-C(32)-C(42) | 119.4(3) |
| C(31)-C(32)-H(32) | 120.3    |
| C(42)-C(32)-H(32) | 120.3    |
| C(34)-C(33)-C(22) | 120.2(3) |
| C(34)-C(33)-H(33) | 119.9    |
| C(22)-C(33)-H(33) | 119.9    |
| C(25)-C(34)-C(33) | 119.9(3) |
| C(25)-C(34)-H(34) | 120.1    |
| C(33)-C(34)-H(34) | 120.1    |
| O(3)-C(35)-N(2)   | 124.4(3) |
| O(3)-C(35)-C(36)  | 127.2(3) |
| N(2)-C(35)-C(36)  | 108.4(2) |
| C(35)-C(36)-C(39) | 114.8(2) |

|                     |          |
|---------------------|----------|
| C(35)-C(36)-C(27)   | 103.5(2) |
| C(39)-C(36)-C(27)   | 118.5(2) |
| C(35)-C(36)-H(36)   | 106.4    |
| C(39)-C(36)-H(36)   | 106.4    |
| C(27)-C(36)-H(36)   | 106.4    |
| C(38)-C(37)-C(28)   | 125.5(3) |
| C(38)-C(37)-H(37)   | 117.3    |
| C(28)-C(37)-H(37)   | 117.3    |
| C(37)-C(38)-C(39)   | 123.0(2) |
| C(37)-C(38)-C(40)   | 121.6(3) |
| C(39)-C(38)-C(40)   | 115.4(2) |
| C(38)-C(39)-C(36)   | 115.4(2) |
| C(38)-C(39)-H(39A)  | 108.4    |
| C(36)-C(39)-H(39A)  | 108.4    |
| C(38)-C(39)-H(39B)  | 108.4    |
| C(36)-C(39)-H(39B)  | 108.4    |
| H(39A)-C(39)-H(39B) | 107.5    |
| C(38)-C(40)-H(40A)  | 109.5    |
| C(38)-C(40)-H(40B)  | 109.5    |
| H(40A)-C(40)-H(40B) | 109.5    |
| C(38)-C(40)-H(40C)  | 109.5    |
| H(40A)-C(40)-H(40C) | 109.5    |
| H(40B)-C(40)-H(40C) | 109.5    |
| C(42)-C(41)-C(29)   | 121.4(3) |
| C(42)-C(41)-H(41)   | 119.3    |
| C(29)-C(41)-H(41)   | 119.3    |
| C(41)-C(42)-C(32)   | 120.0(3) |
| C(41)-C(42)-H(42)   | 120.0    |
| C(32)-C(42)-H(42)   | 120.0    |

---

Symmetry transformations used to generate equivalent atoms:

Table 4. Anisotropic displacement parameters ( $\text{\AA}^2 \times 10^3$ ) for twin5. The anisotropic displacement factor exponent takes the form:  $-2\pi^2 [h^2 a^{*2} U^{11} + \dots + 2 h k a^* b^* U^{12}]$

|       | $U^{11}$ | $U^{22}$ | $U^{33}$ | $U^{23}$ | $U^{13}$ | $U^{12}$ |
|-------|----------|----------|----------|----------|----------|----------|
| O(1)  | 23(1)    | 25(1)    | 22(1)    | 2(1)     | 2(1)     | 8(1)     |
| O(2)  | 22(1)    | 23(1)    | 26(1)    | 6(1)     | -1(1)    | 1(1)     |
| O(3)  | 21(1)    | 24(1)    | 23(1)    | 7(1)     | 4(1)     | 3(1)     |
| O(4)  | 18(1)    | 23(1)    | 22(1)    | 2(1)     | 3(1)     | -6(1)    |
| N(1)  | 18(1)    | 19(1)    | 18(1)    | -1(1)    | 3(1)     | 0(1)     |
| N(2)  | 14(1)    | 15(1)    | 18(1)    | 1(1)     | 1(1)     | -1(1)    |
| C(1)  | 20(1)    | 30(2)    | 33(2)    | 8(2)     | 10(1)    | 1(1)     |
| C(2)  | 28(2)    | 33(2)    | 19(1)    | 3(1)     | 5(1)     | 4(2)     |
| C(3)  | 22(1)    | 22(2)    | 23(1)    | -2(1)    | -2(1)    | 1(1)     |
| C(4)  | 16(1)    | 20(2)    | 20(1)    | 4(1)     | 4(1)     | 4(1)     |
| C(5)  | 22(1)    | 19(2)    | 18(1)    | -3(1)    | 6(1)     | 0(1)     |
| C(6)  | 20(1)    | 15(2)    | 23(1)    | 0(1)     | 6(1)     | 2(1)     |
| C(7)  | 24(1)    | 20(2)    | 16(1)    | 1(1)     | 7(1)     | 5(1)     |
| C(8)  | 22(1)    | 21(2)    | 16(1)    | -3(1)    | 5(1)     | 6(1)     |
| C(9)  | 24(1)    | 20(2)    | 25(1)    | -2(1)    | -5(1)    | 2(1)     |
| C(10) | 38(2)    | 20(2)    | 26(2)    | -2(2)    | 0(1)     | 2(2)     |
| C(11) | 34(2)    | 26(2)    | 32(2)    | -15(2)   | 12(2)    | -7(2)    |
| C(12) | 19(1)    | 28(2)    | 41(2)    | -6(2)    | 0(1)     | -6(1)    |
| C(13) | 23(1)    | 31(2)    | 21(1)    | -5(1)    | 2(1)     | -1(2)    |
| C(14) | 23(1)    | 19(2)    | 24(1)    | 0(1)     | 8(1)     | 3(1)     |
| C(15) | 20(1)    | 17(2)    | 26(1)    | -1(1)    | 10(1)    | 0(1)     |
| C(16) | 23(2)    | 30(2)    | 34(2)    | -1(2)    | 6(1)     | 2(1)     |
| C(17) | 17(1)    | 23(2)    | 26(1)    | 1(1)     | 0(1)     | 1(1)     |
| C(18) | 19(1)    | 16(2)    | 23(1)    | -1(1)    | 5(1)     | 0(1)     |
| C(19) | 20(1)    | 15(2)    | 19(1)    | -2(1)    | -2(1)    | -2(1)    |
| C(20) | 25(1)    | 31(2)    | 19(1)    | -6(1)    | -1(1)    | 8(1)     |
| C(21) | 18(1)    | 37(2)    | 31(2)    | -15(2)   | 0(1)     | 1(2)     |
| C(22) | 15(1)    | 28(2)    | 31(2)    | 4(2)     | -4(1)    | 1(1)     |
| C(23) | 22(1)    | 26(2)    | 22(1)    | 1(1)     | -4(1)    | -2(1)    |
| C(24) | 20(1)    | 20(2)    | 22(1)    | -1(1)    | 3(1)     | 4(1)     |
| C(25) | 15(1)    | 14(2)    | 22(1)    | 2(1)     | 0(1)     | -1(1)    |
| C(26) | 20(1)    | 12(2)    | 15(1)    | -3(1)    | 0(1)     | 0(1)     |
| C(27) | 18(1)    | 13(2)    | 17(1)    | 2(1)     | 0(1)     | -2(1)    |

|       |       |       |       |        |       |       |
|-------|-------|-------|-------|--------|-------|-------|
| C(28) | 23(1) | 18(2) | 13(1) | 2(1)   | 0(1)  | -1(1) |
| C(29) | 15(1) | 21(2) | 16(1) | -2(1)  | -1(1) | -1(1) |
| C(30) | 22(1) | 24(2) | 20(1) | 0(1)   | 1(1)  | -3(1) |
| C(31) | 18(1) | 33(2) | 24(1) | -10(2) | 1(1)  | 0(1)  |
| C(32) | 25(2) | 27(2) | 27(2) | -10(2) | -5(1) | 9(1)  |
| C(33) | 20(1) | 24(2) | 31(2) | 3(1)   | 6(1)  | 5(1)  |
| C(34) | 19(1) | 25(2) | 22(1) | 1(1)   | 3(1)  | -3(1) |
| C(35) | 18(1) | 14(2) | 17(1) | -2(1)  | 2(1)  | 1(1)  |
| C(36) | 17(1) | 18(2) | 17(1) | -1(1)  | 3(1)  | -1(1) |
| C(37) | 20(1) | 17(2) | 20(1) | -2(1)  | -2(1) | 0(1)  |
| C(38) | 18(1) | 17(2) | 26(2) | 0(1)   | -2(1) | 0(1)  |
| C(39) | 16(1) | 21(2) | 21(1) | 3(1)   | 4(1)  | 0(1)  |
| C(40) | 20(1) | 28(2) | 28(1) | -1(2)  | -2(1) | -6(1) |
| C(41) | 21(1) | 21(2) | 18(1) | -3(1)  | 1(1)  | -2(1) |
| C(42) | 31(2) | 18(2) | 28(2) | -1(1)  | -4(1) | 0(2)  |

---

Table 5. Hydrogen coordinates ( $\times 10^4$ ) and isotropic displacement parameters ( $\text{\AA}^2 \times 10^{-3}$ ) for twin5.

|        | x     | y     | z     | U(eq) |
|--------|-------|-------|-------|-------|
| H(1)   | 4642  | 3537  | 5843  | 33    |
| H(2)   | 6383  | 5062  | 6386  | 32    |
| H(3)   | 8168  | 6065  | 5792  | 27    |
| H(6)   | 10033 | 7817  | 3543  | 23    |
| H(7)   | 9369  | 6266  | 2638  | 23    |
| H(9)   | 10265 | 2771  | 3673  | 28    |
| H(10)  | 8848  | 565   | 3786  | 34    |
| H(11)  | 6674  | 482   | 3215  | 36    |
| H(12)  | 4705  | 2943  | 4704  | 35    |
| H(13)  | 6509  | 3890  | 4107  | 30    |
| H(14)  | 11422 | 5115  | 2405  | 26    |
| H(16A) | 13700 | 4496  | 2646  | 43    |
| H(16B) | 13929 | 3505  | 3332  | 43    |
| H(16C) | 14369 | 5360  | 3308  | 43    |
| H(17A) | 12949 | 5890  | 4254  | 26    |
| H(17B) | 12188 | 4191  | 4276  | 26    |
| H(18)  | 11138 | 7109  | 4494  | 23    |
| H(20)  | 7324  | 4881  | 2444  | 30    |
| H(21)  | 5953  | 2618  | 2519  | 35    |
| H(22)  | -591  | 9605  | -920  | 30    |
| H(23)  | 997   | 8114  | -1479 | 29    |
| H(24)  | 2956  | 7069  | -882  | 25    |
| H(27)  | 5516  | 5265  | 1396  | 19    |
| H(28)  | 5173  | 6805  | 2293  | 22    |
| H(30)  | 3141  | 8028  | 2548  | 27    |
| H(31)  | 1662  | 10226 | 2543  | 30    |
| H(32)  | 1969  | 12420 | 1845  | 32    |
| H(33)  | -218  | 10048 | 236   | 30    |
| H(34)  | 1715  | 8985  | 829   | 27    |
| H(36)  | 6318  | 5948  | 442   | 21    |
| H(37)  | 7160  | 8282  | 2488  | 23    |
| H(39A) | 8174  | 7225  | 689   | 23    |

|        |      |       |      |    |
|--------|------|-------|------|----|
| H(39B) | 7369 | 8891  | 594  | 23 |
| H(40A) | 9284 | 9106  | 2236 | 38 |
| H(40B) | 9307 | 9874  | 1502 | 38 |
| H(40C) | 9843 | 8073  | 1638 | 38 |
| H(41)  | 5352 | 10304 | 1207 | 24 |
| H(42)  | 3820 | 12444 | 1169 | 31 |

---

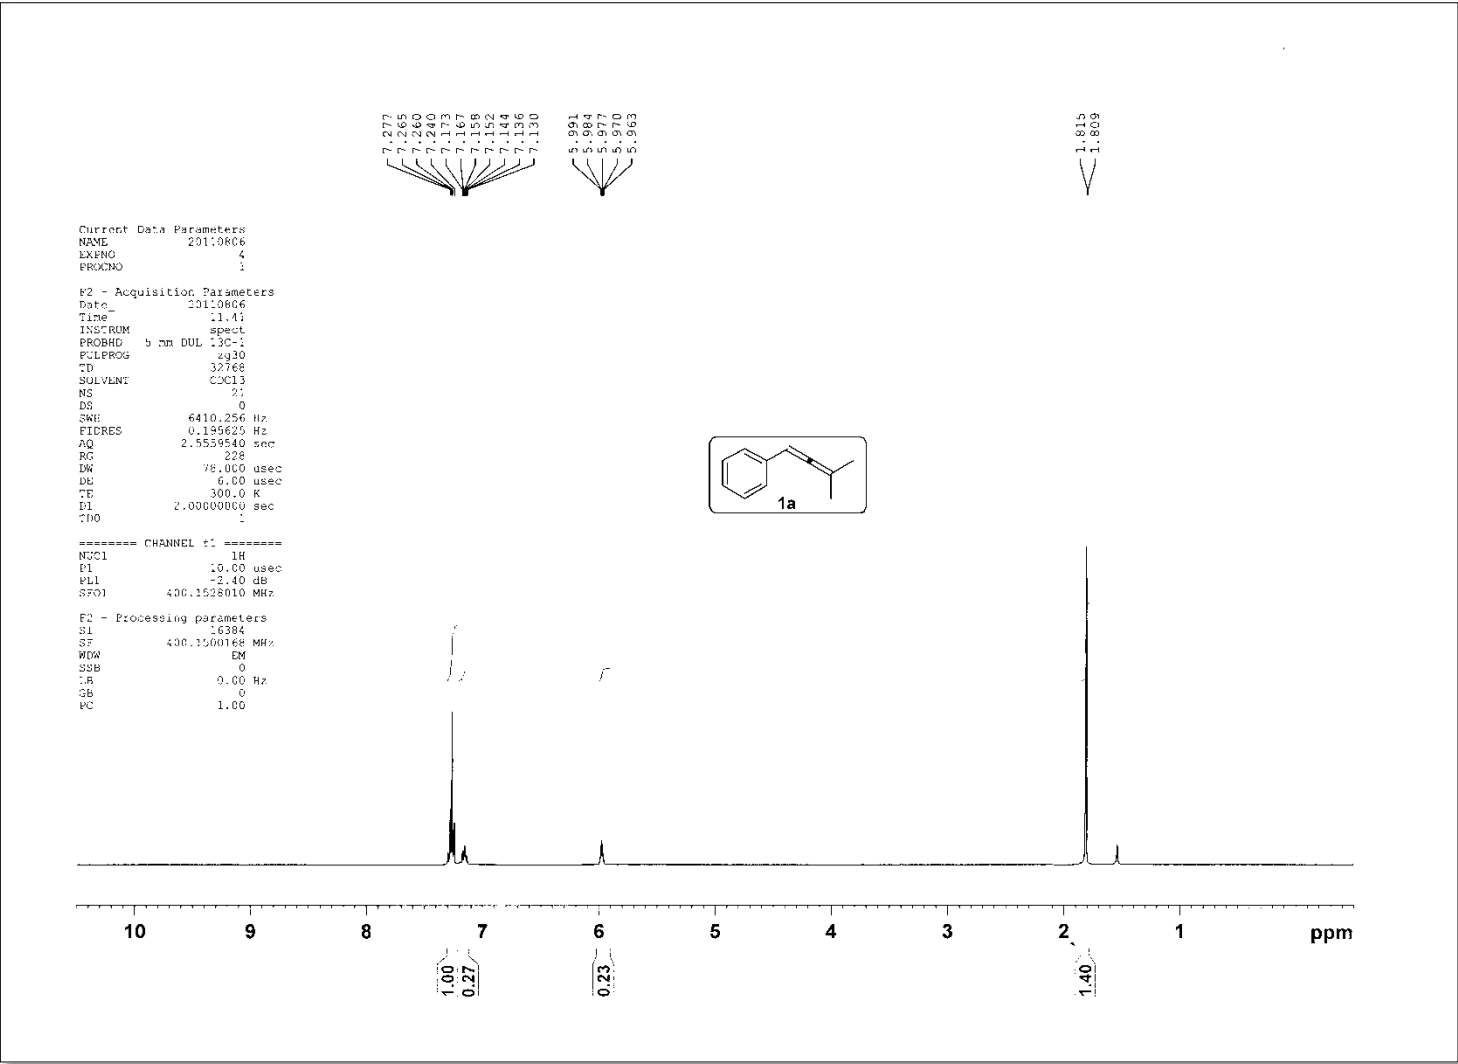

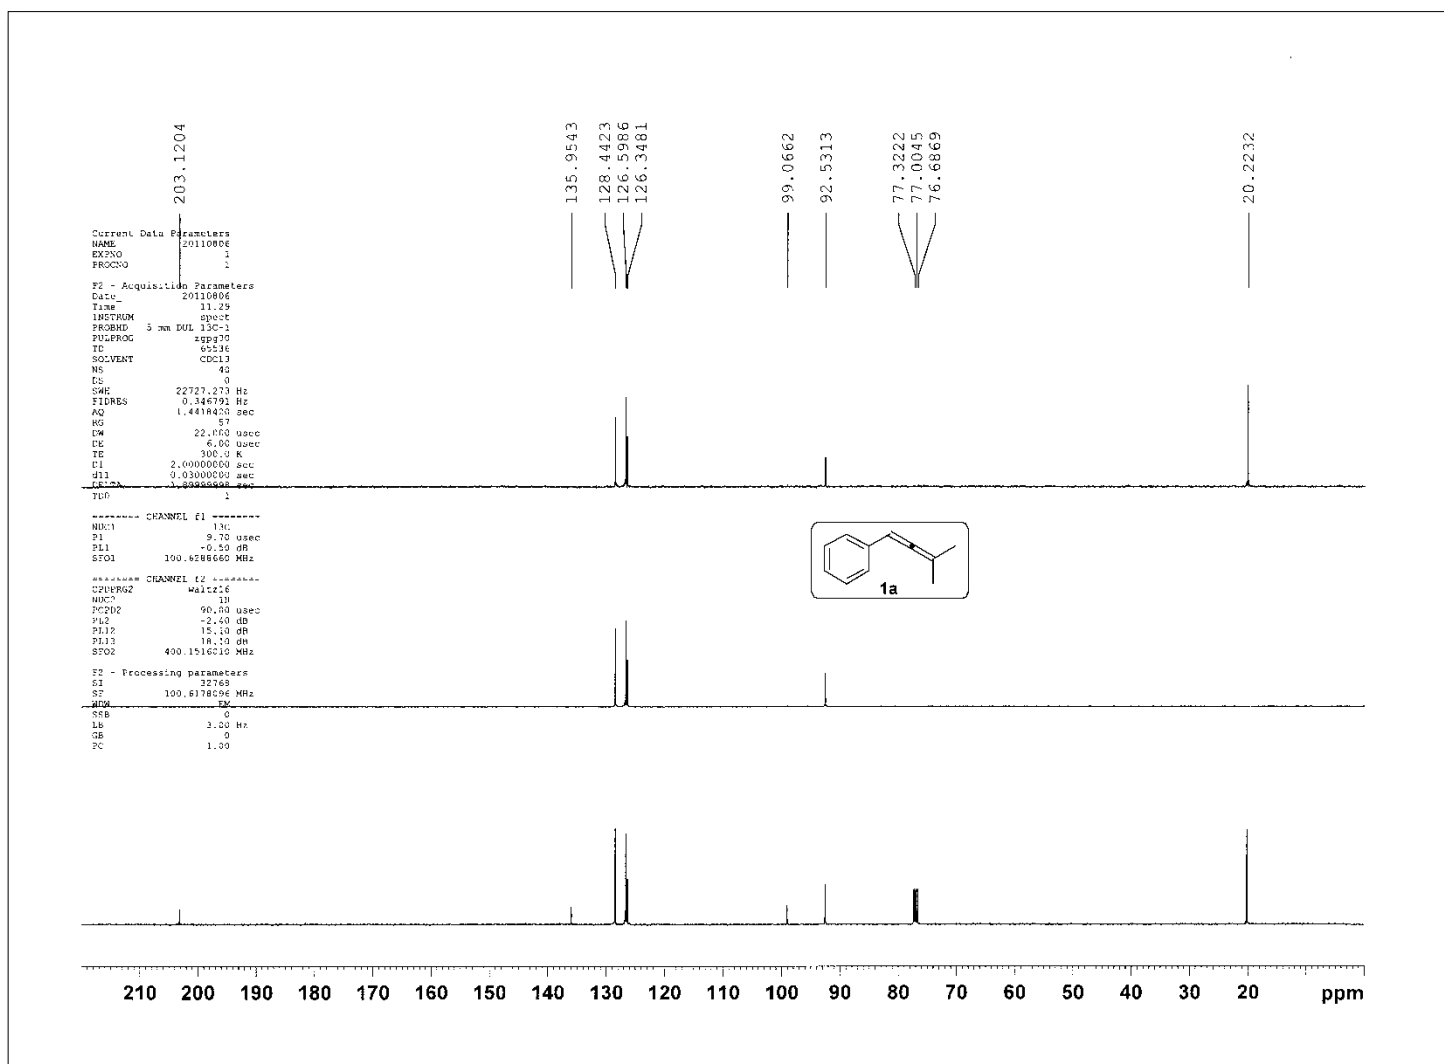

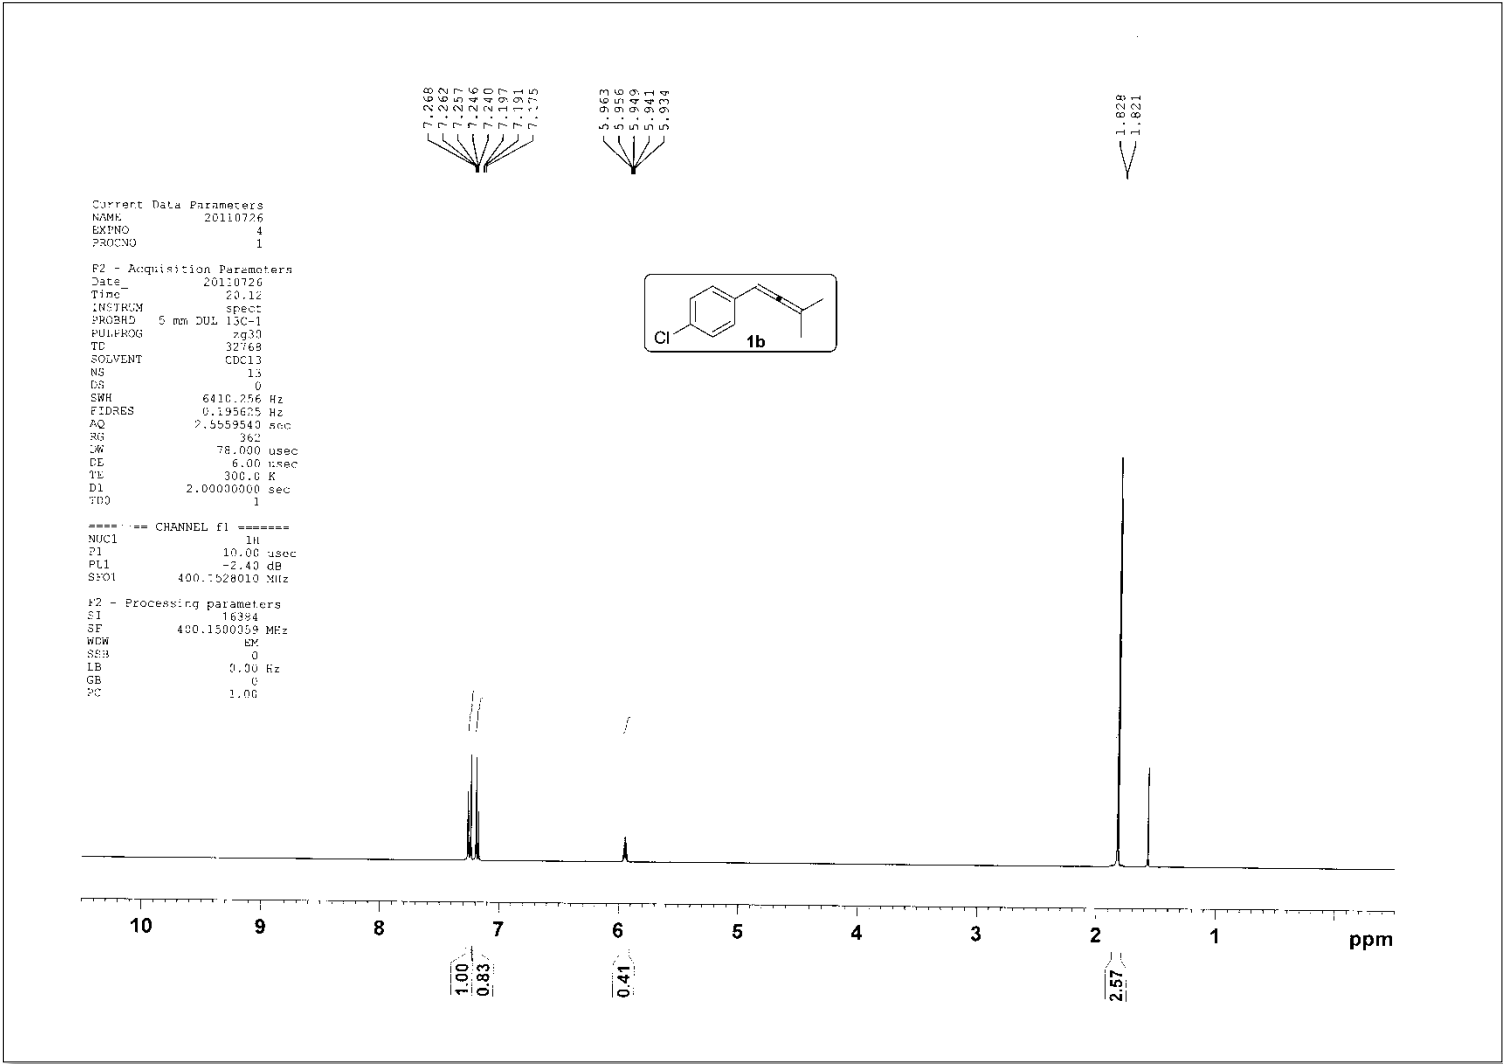

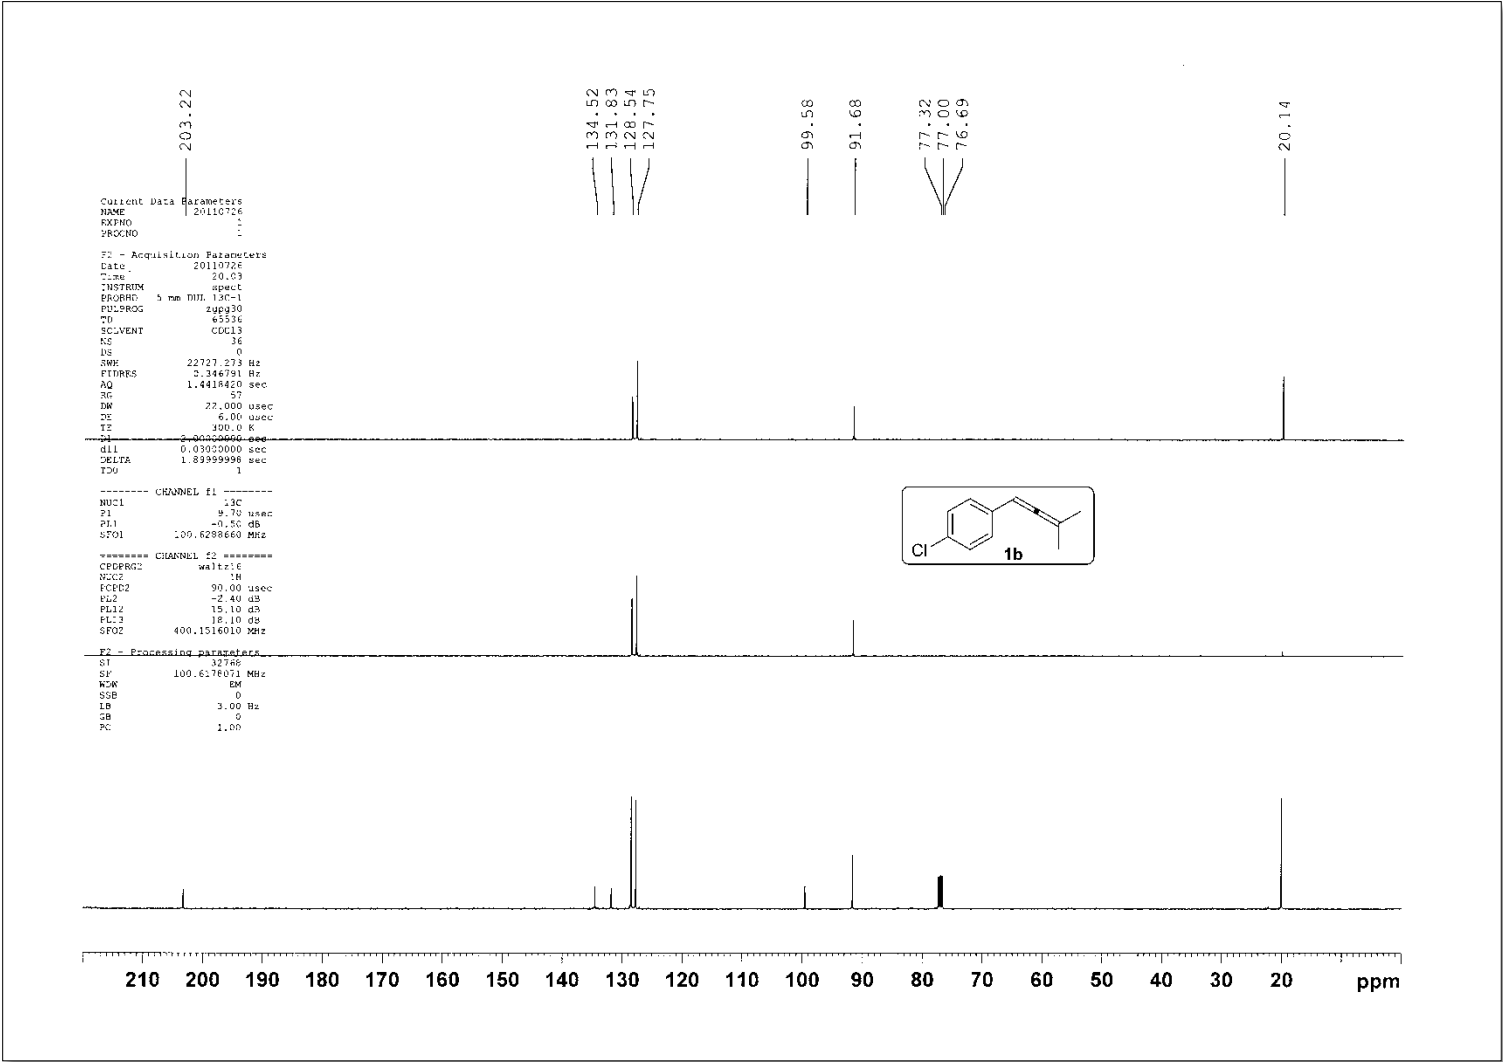

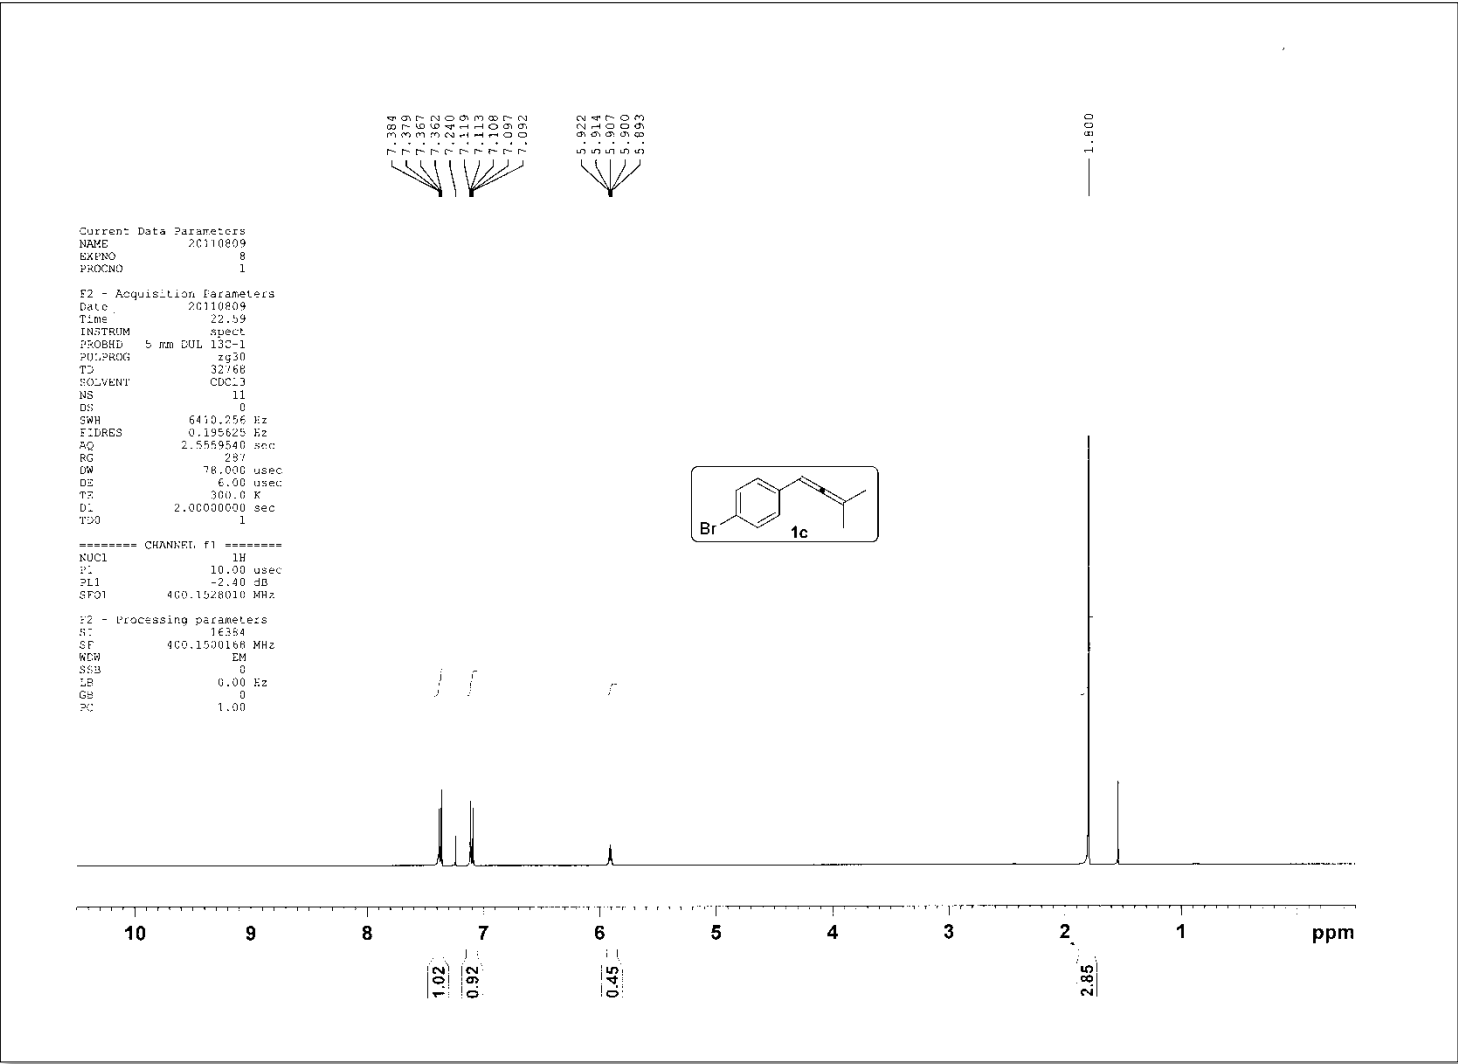

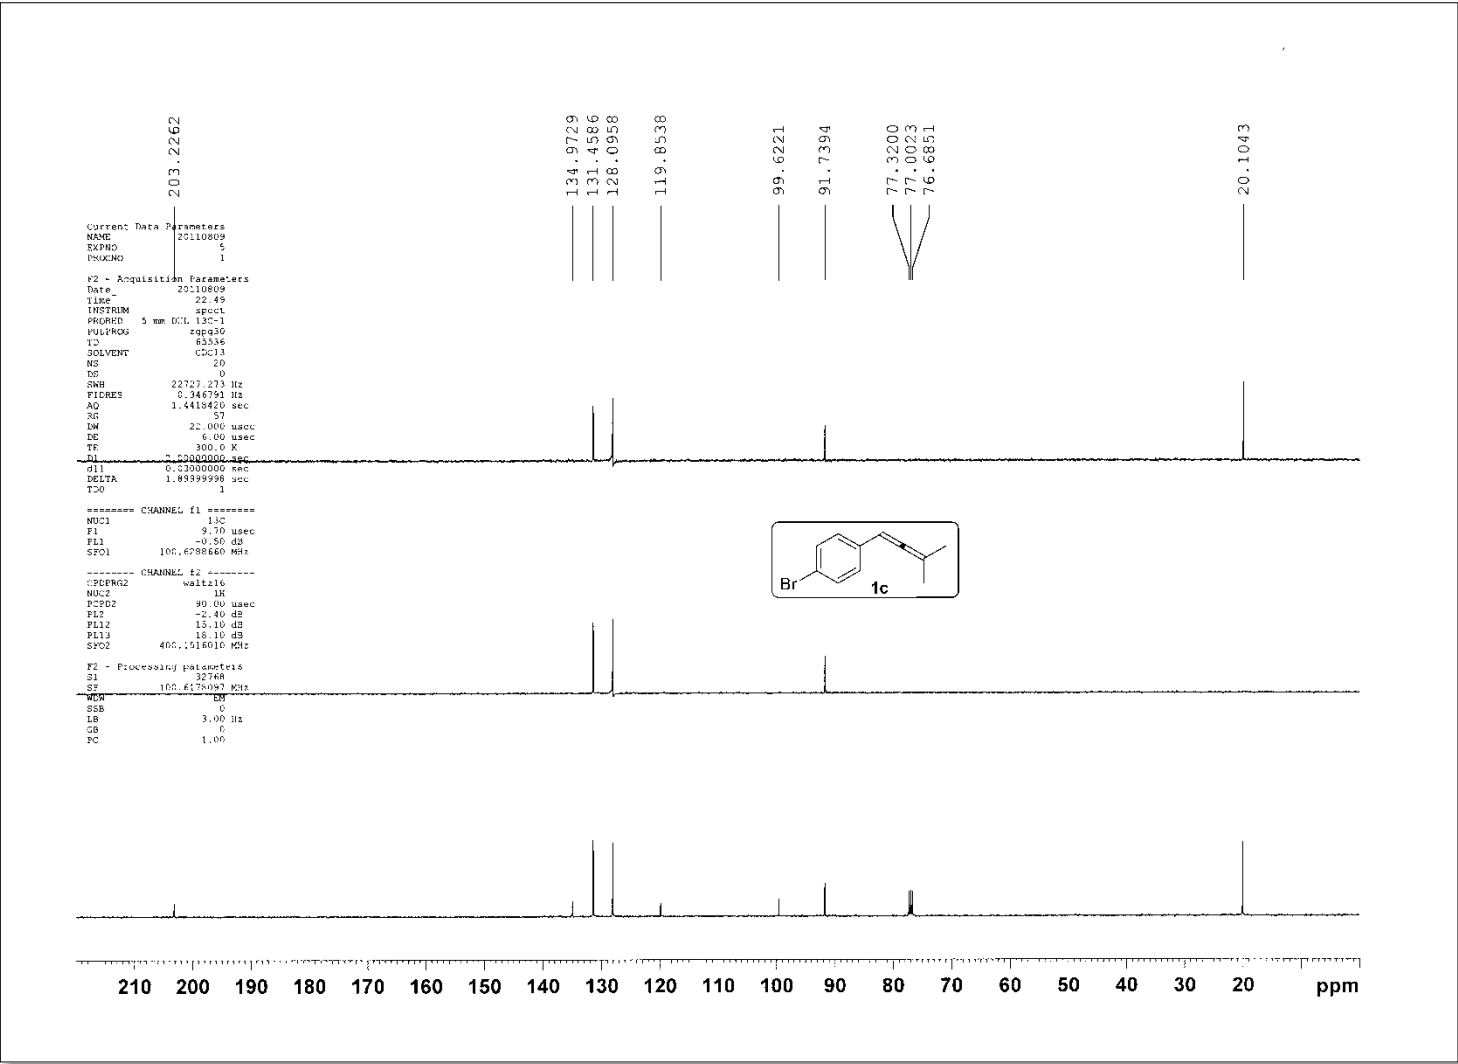

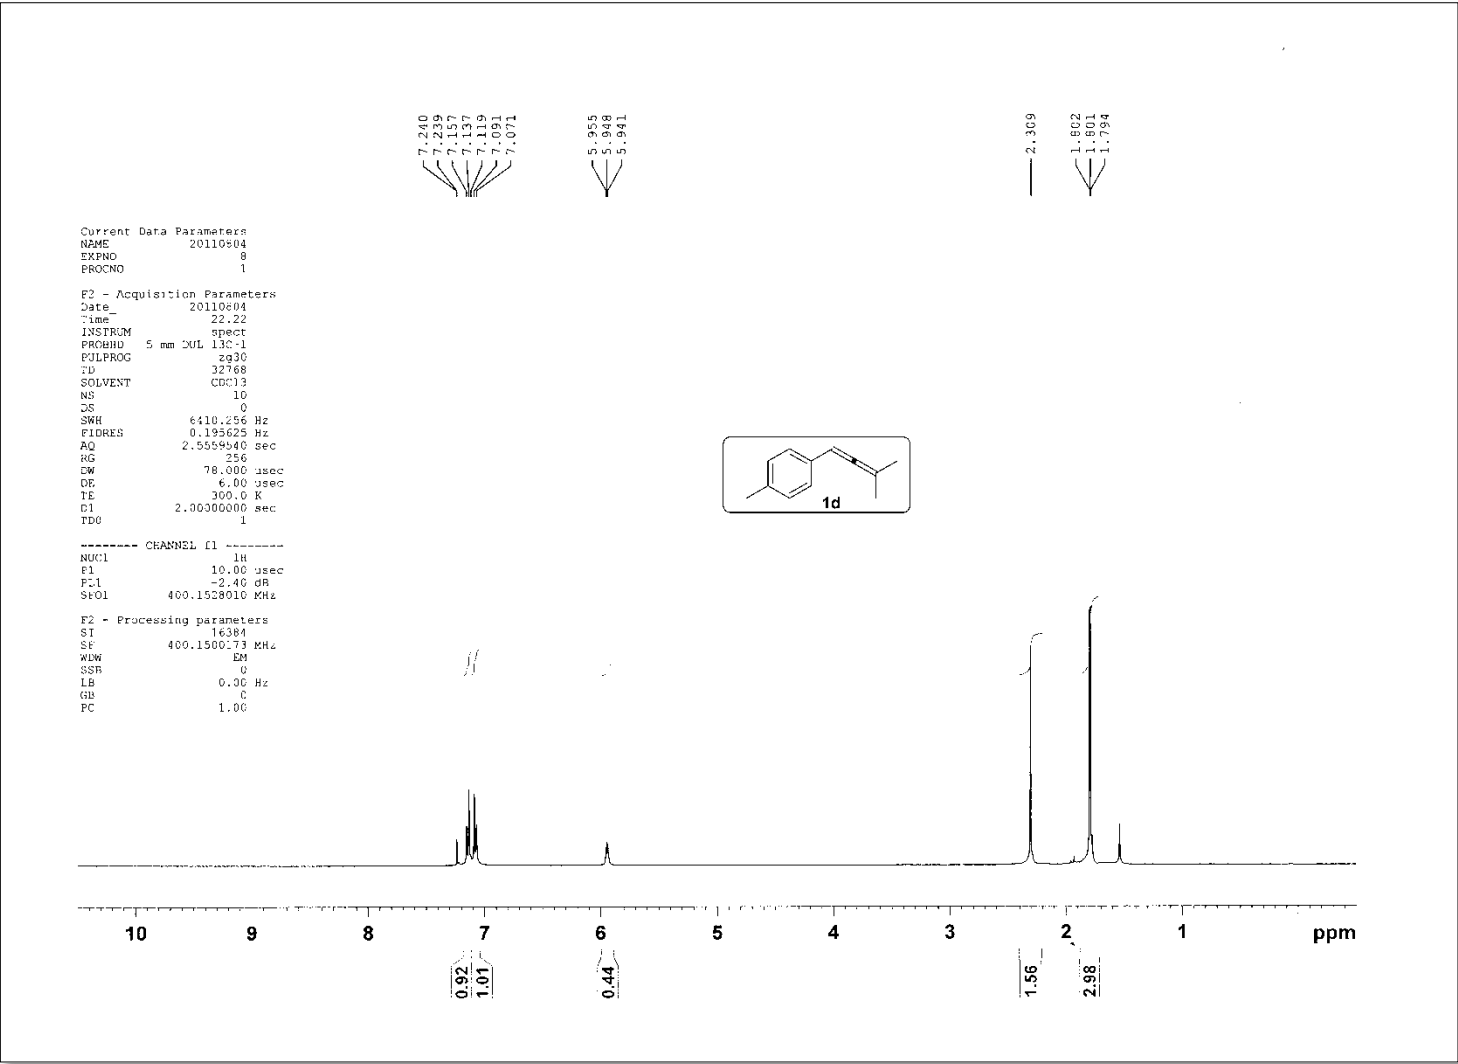

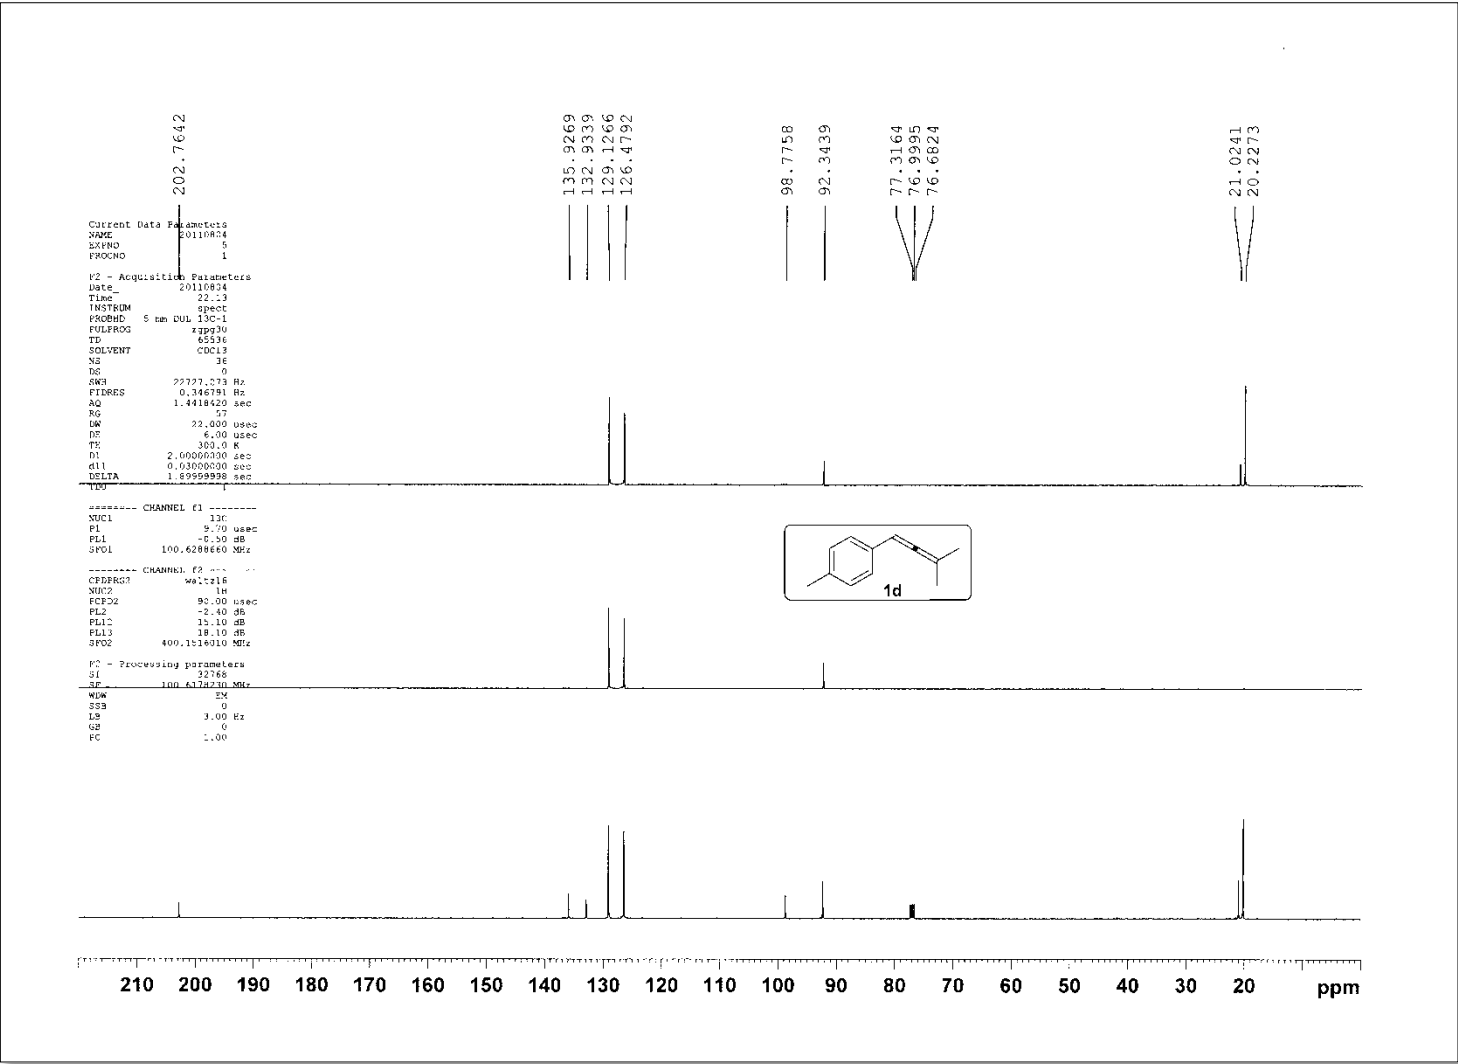

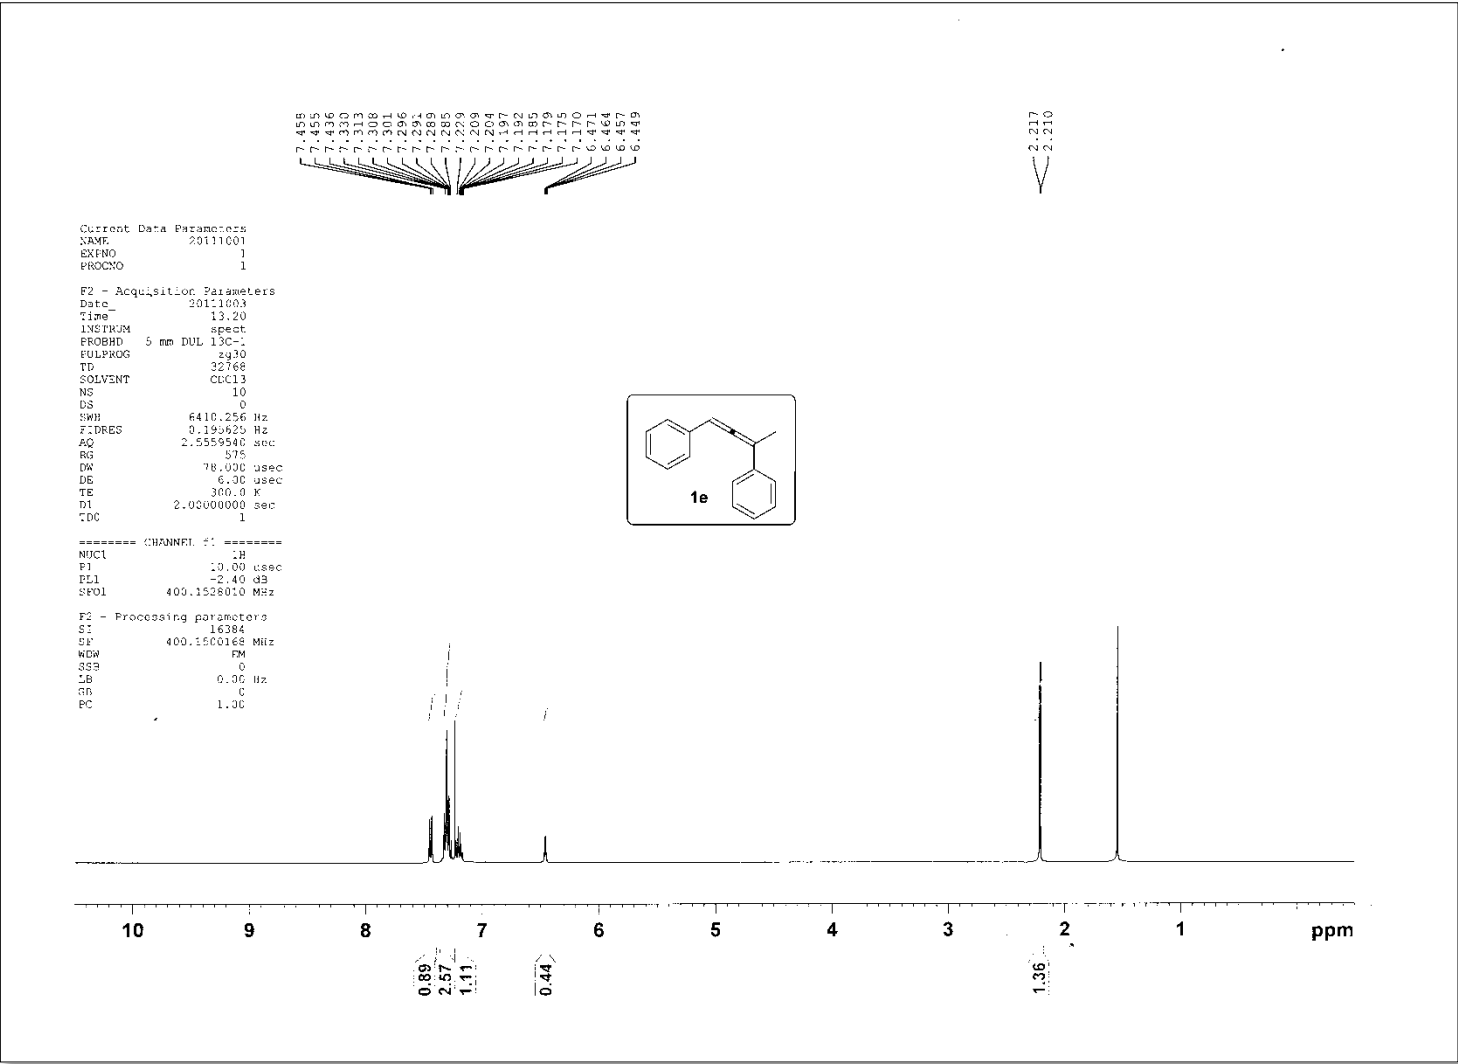

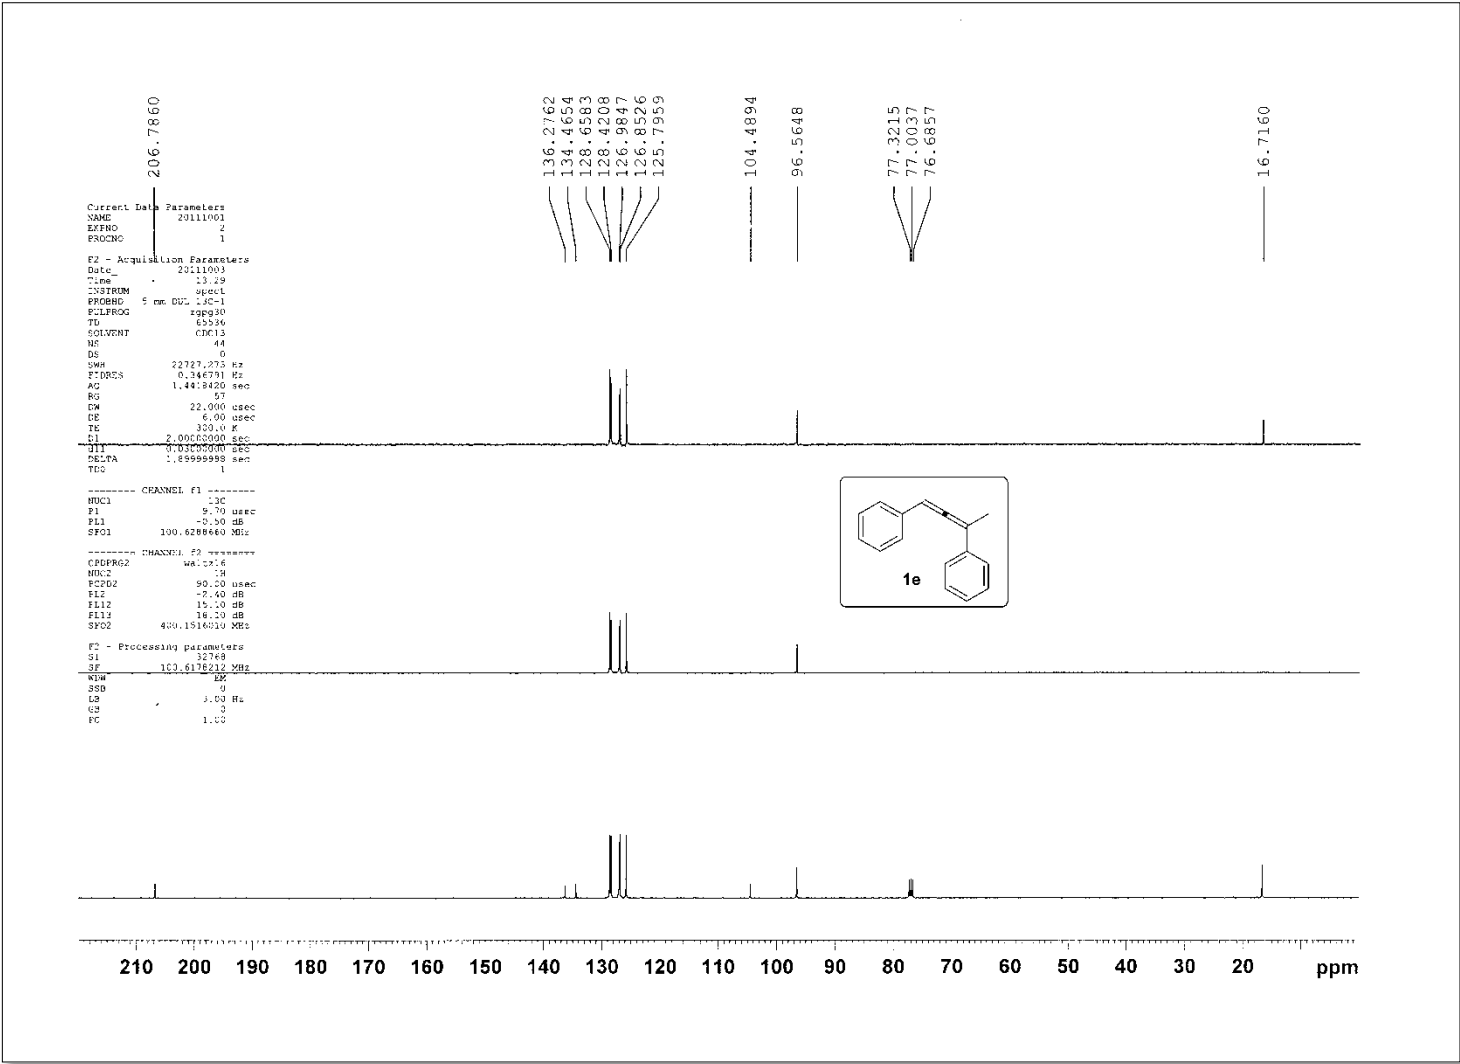

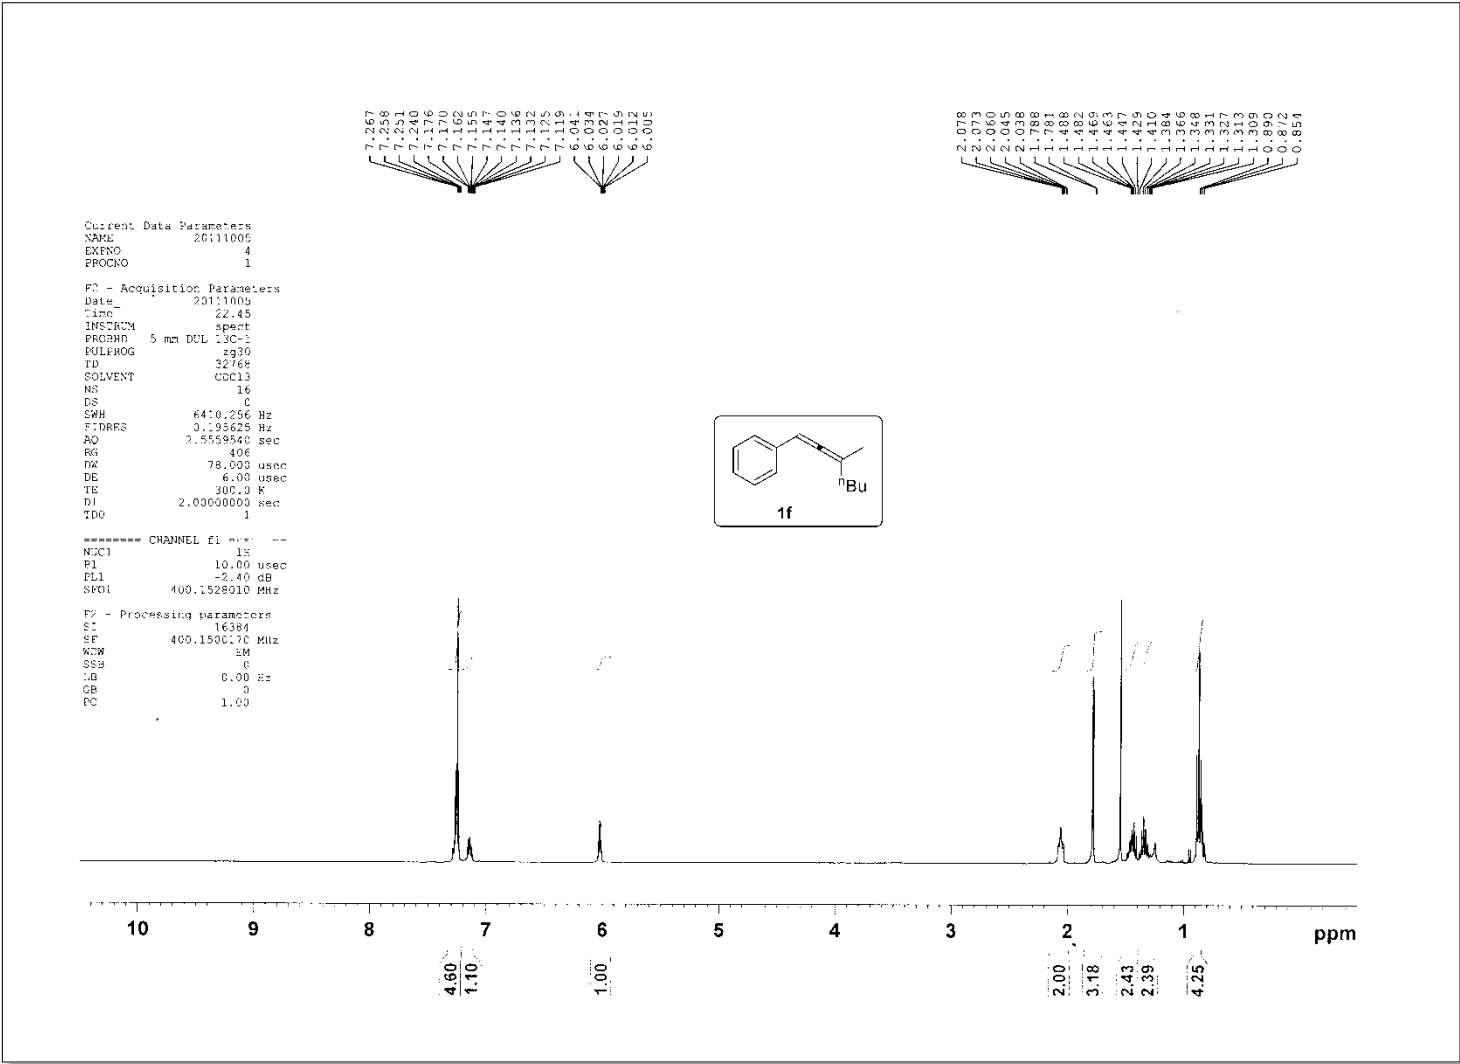

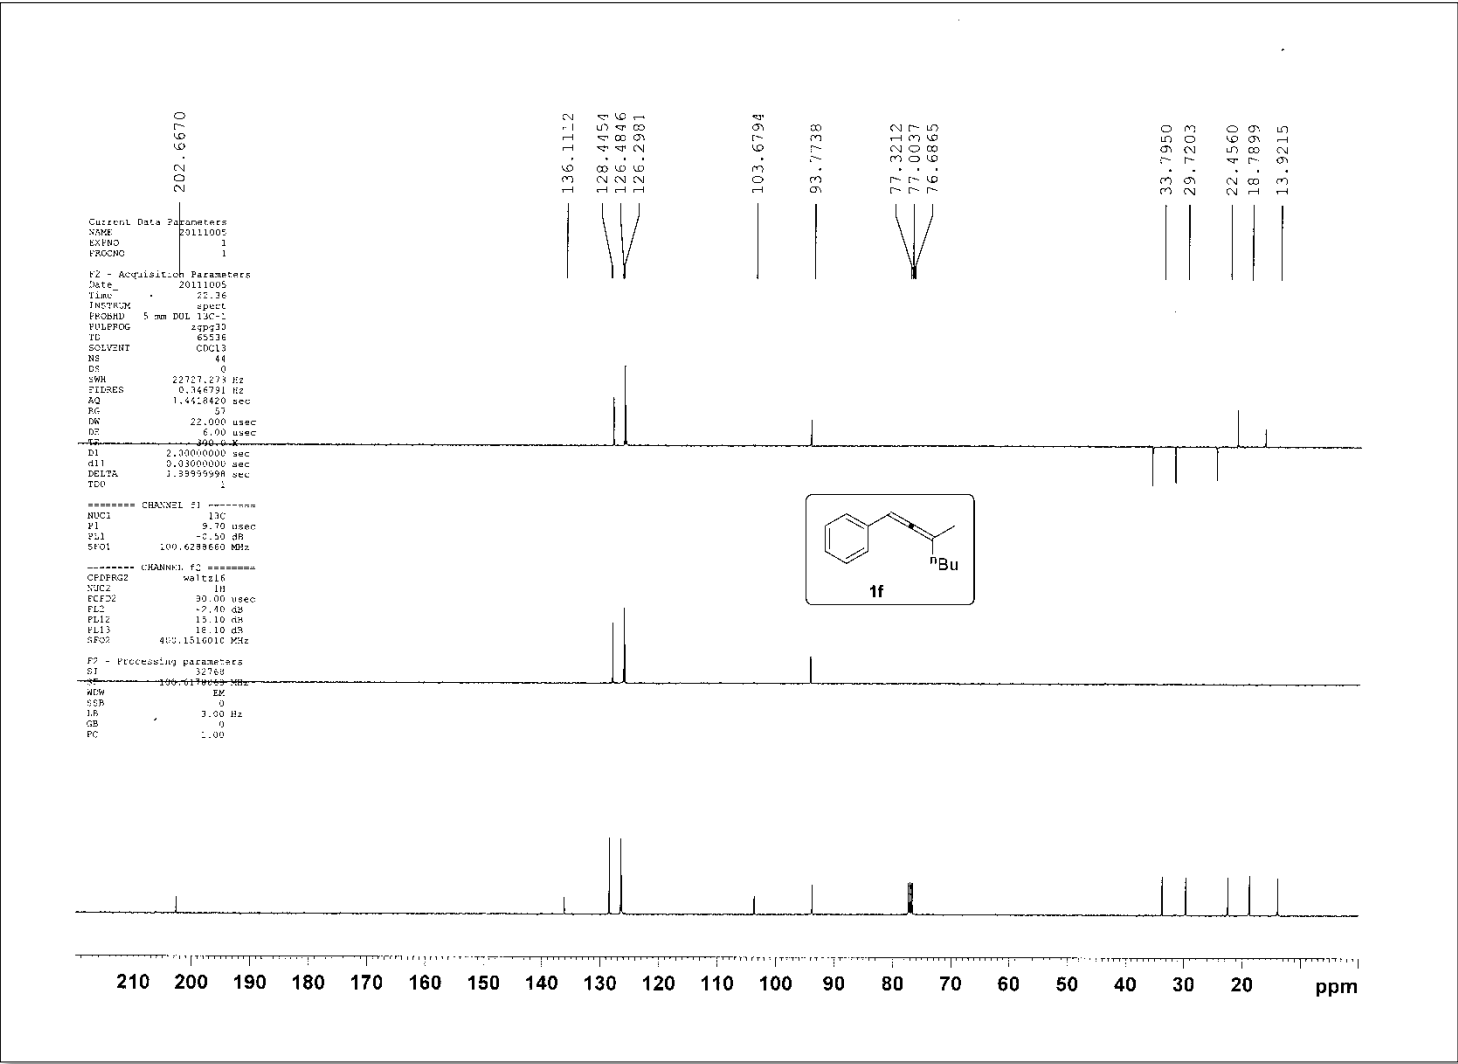

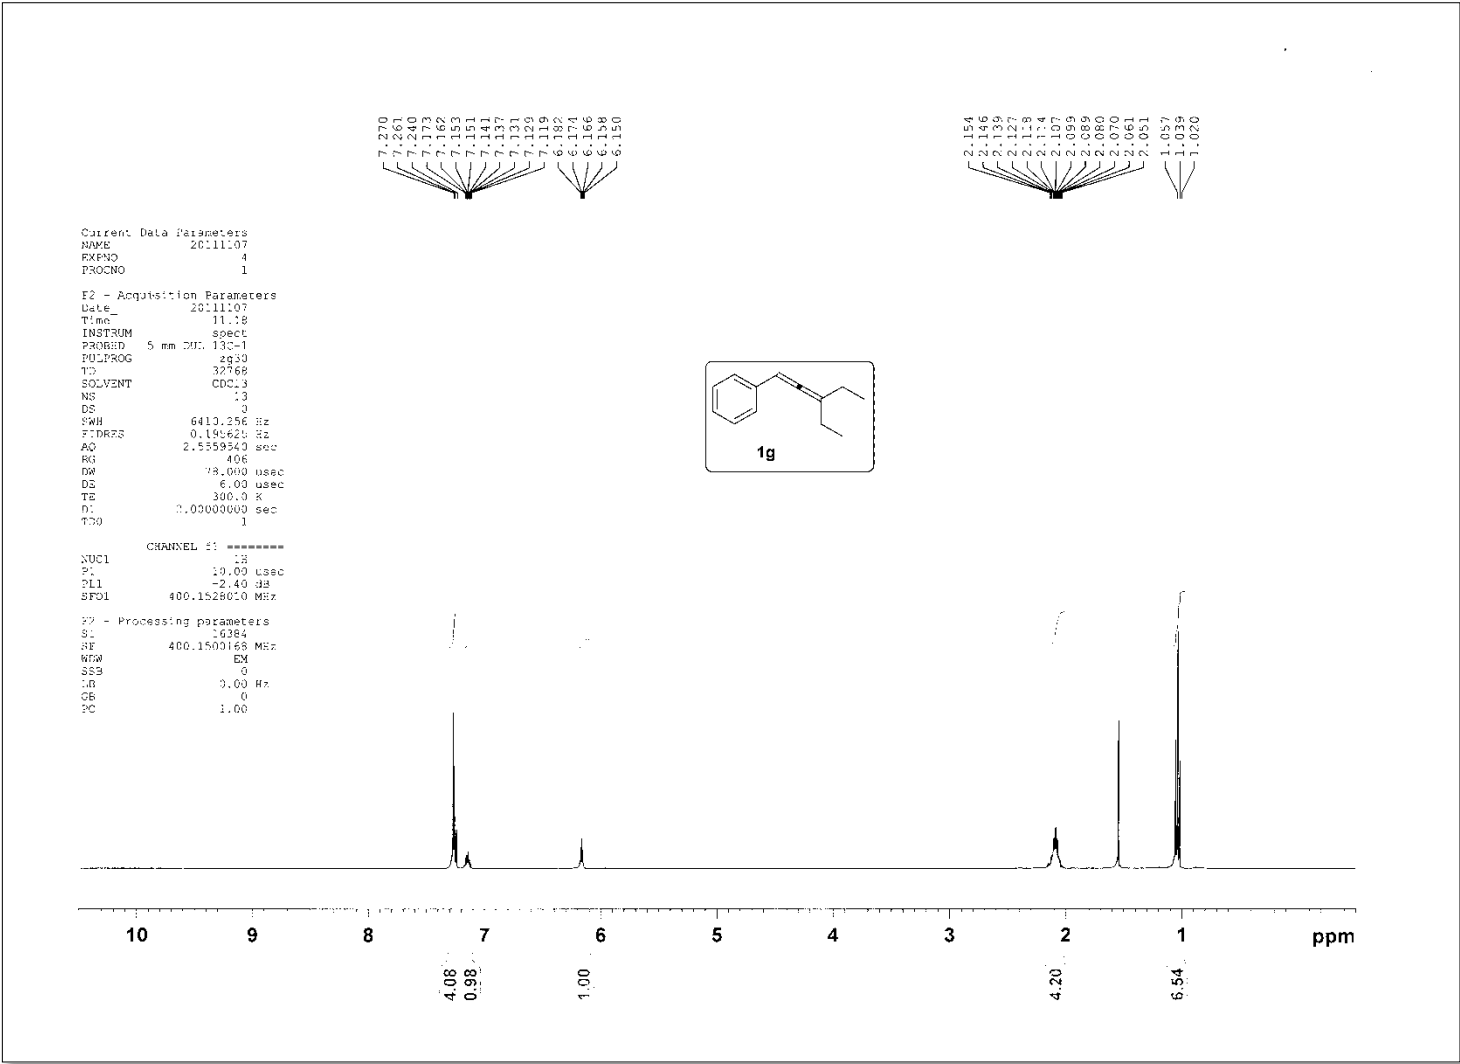

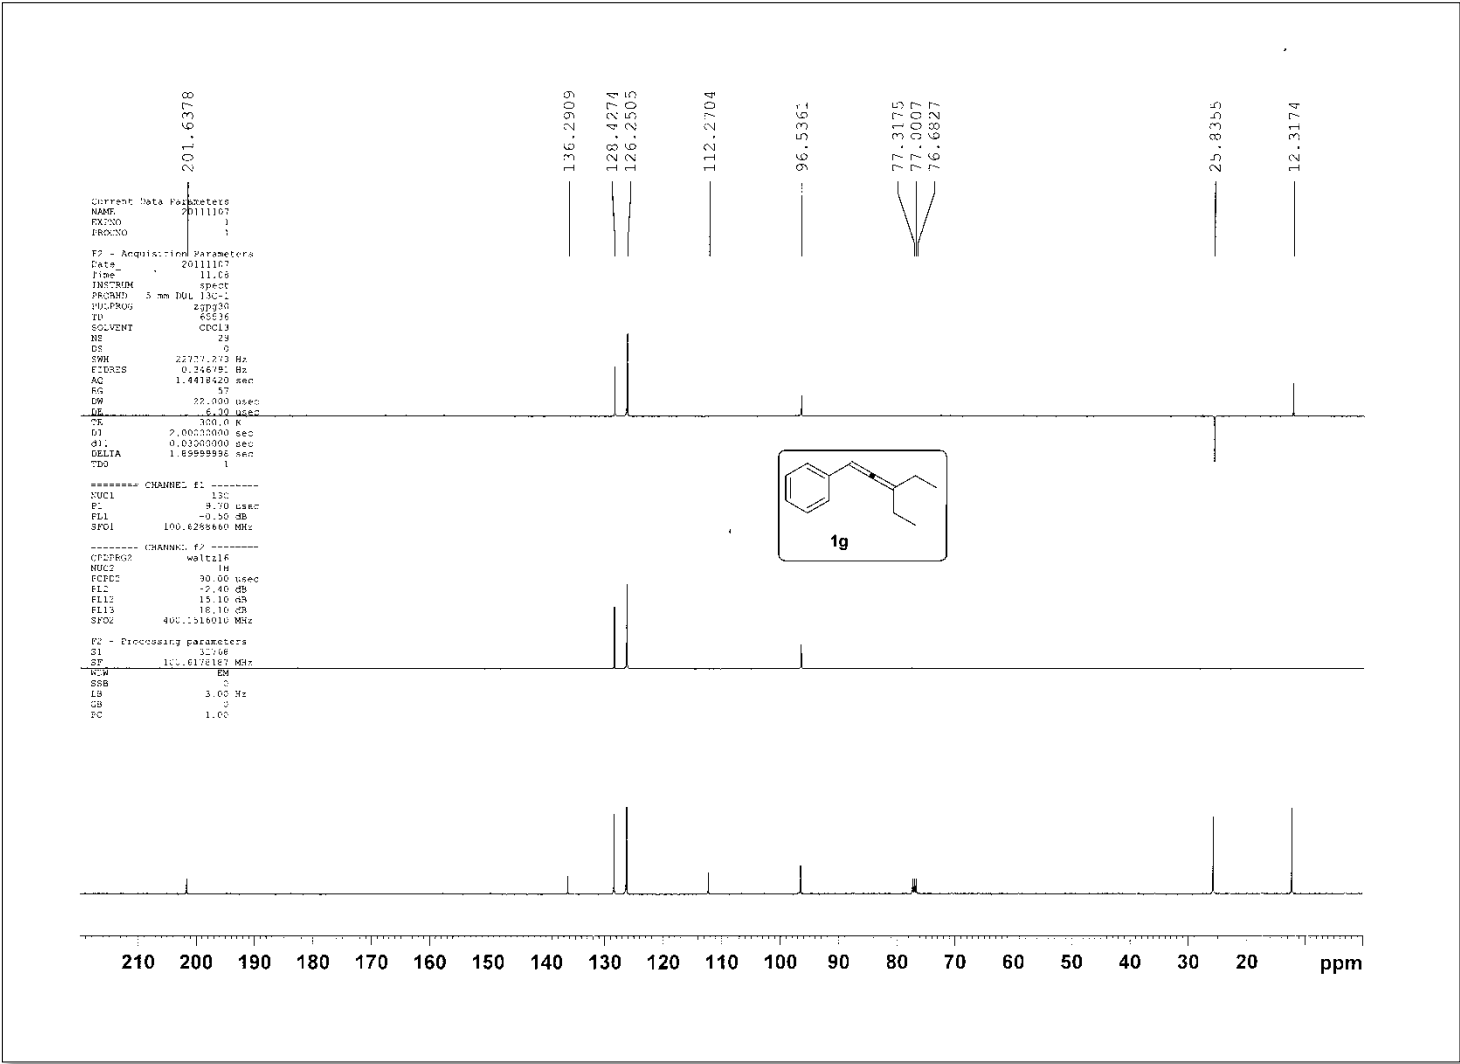

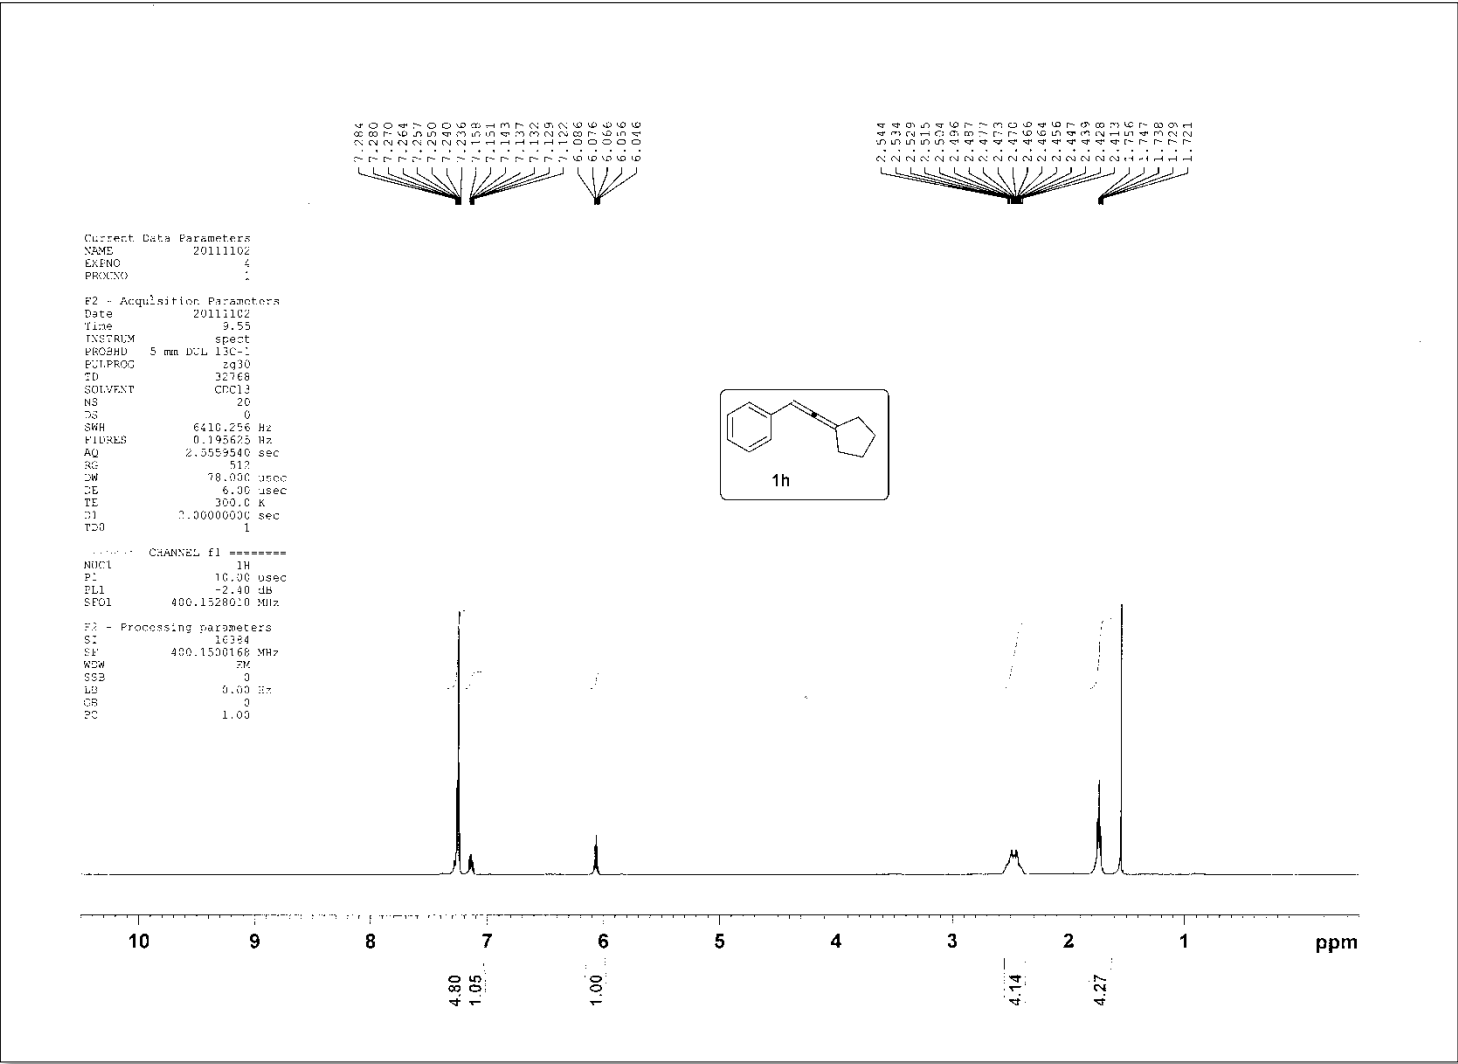

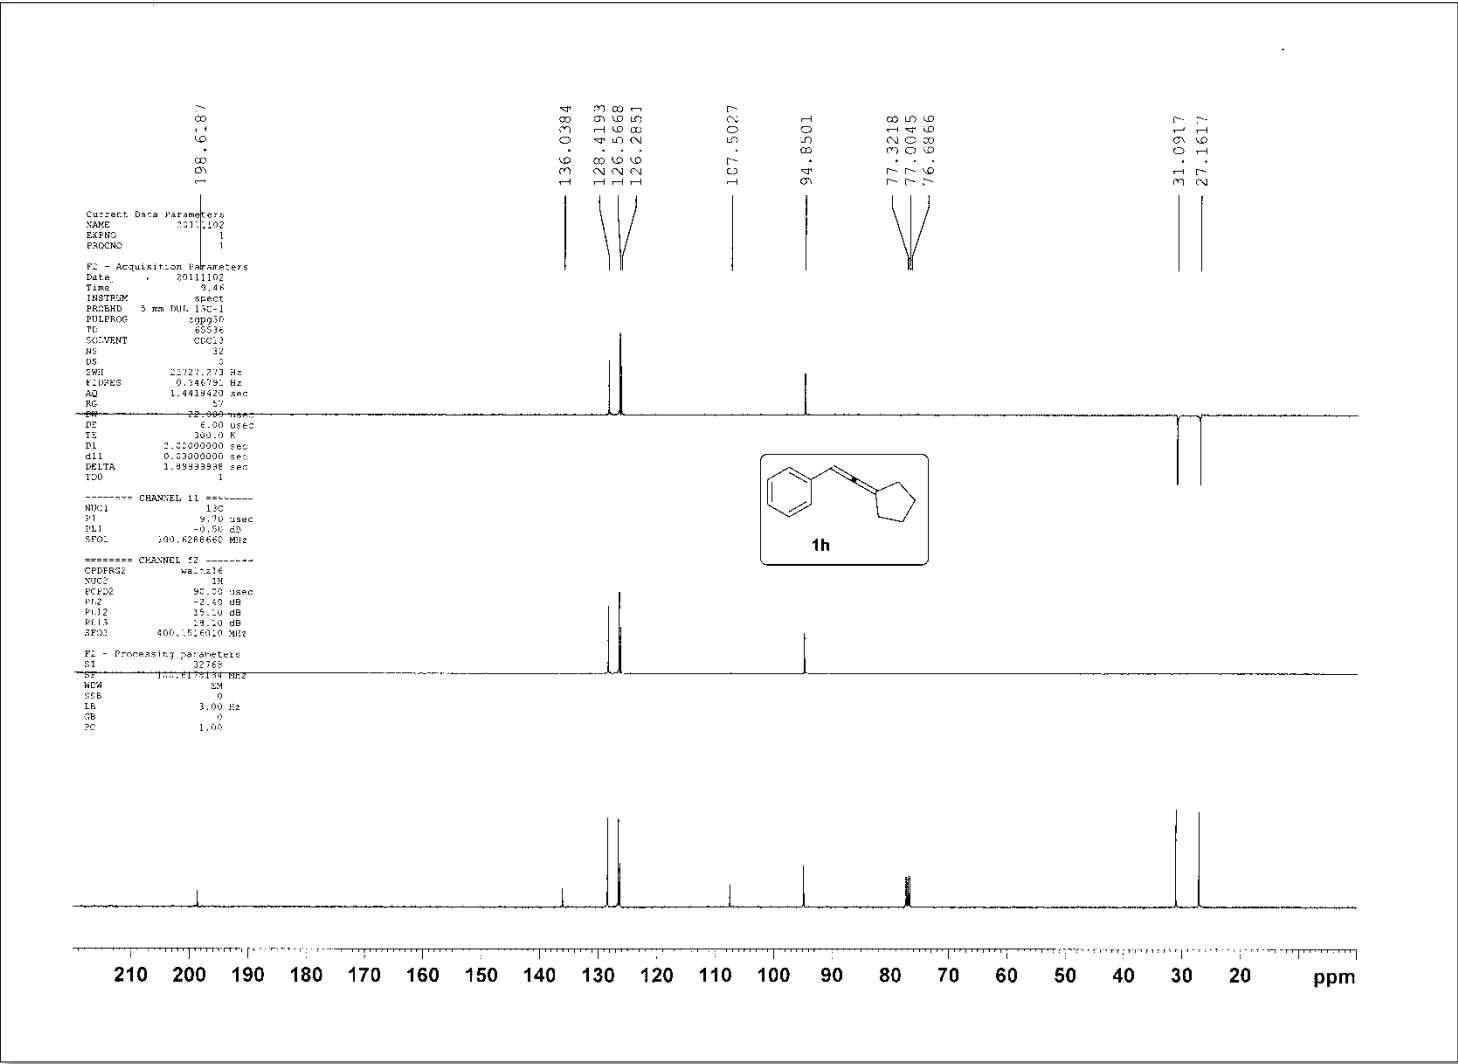

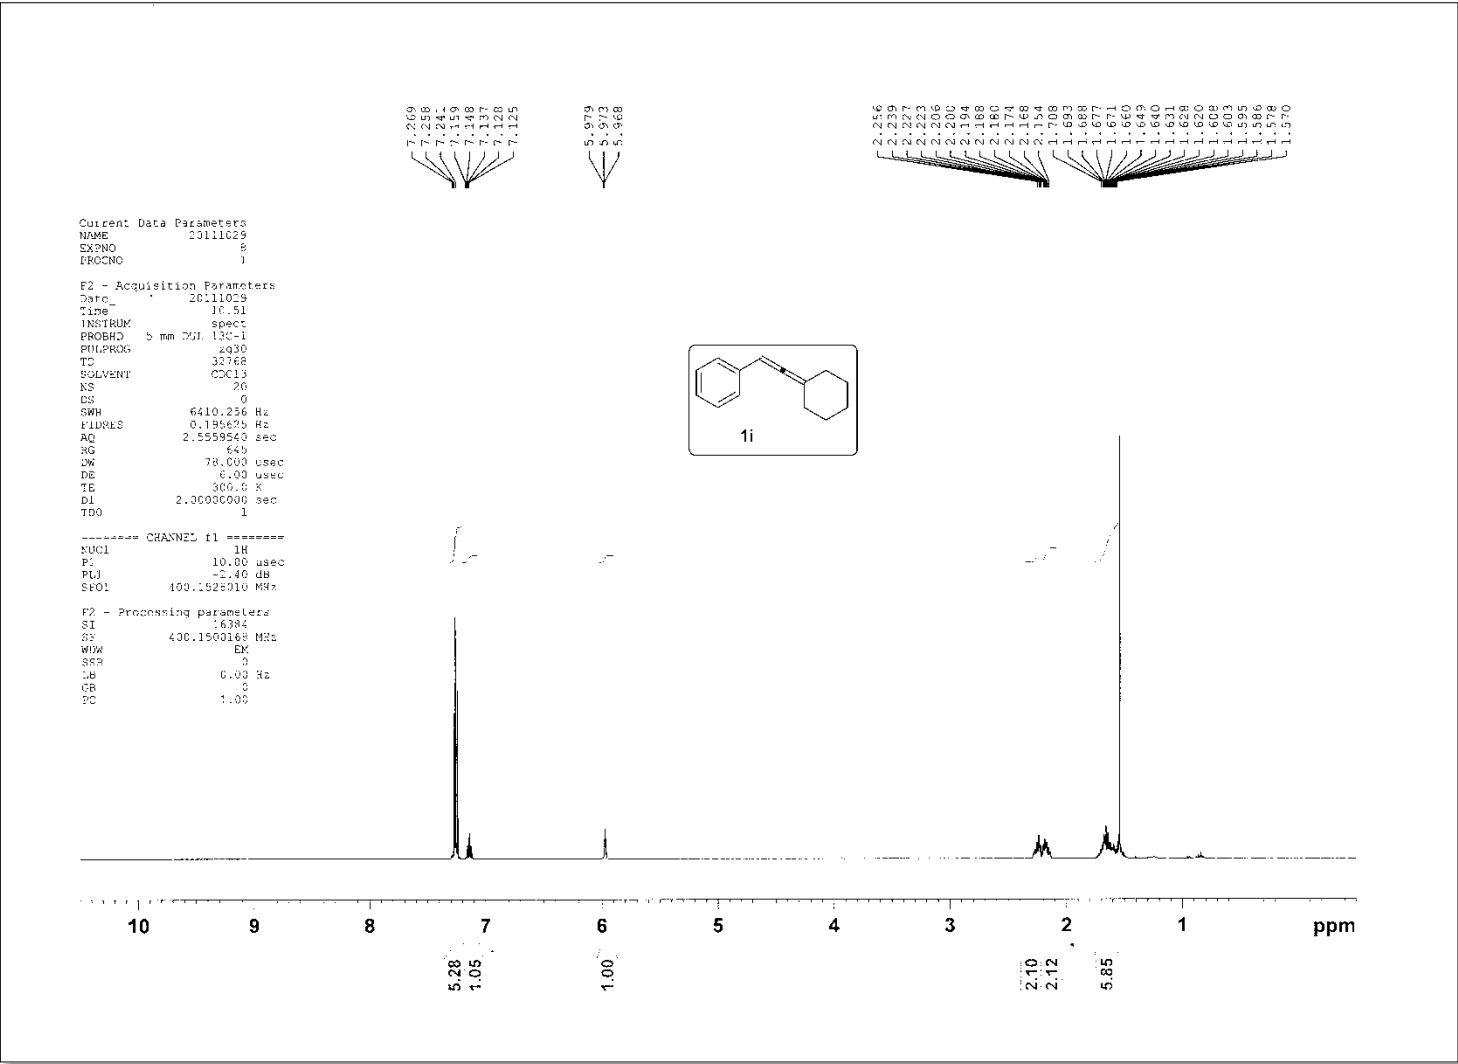

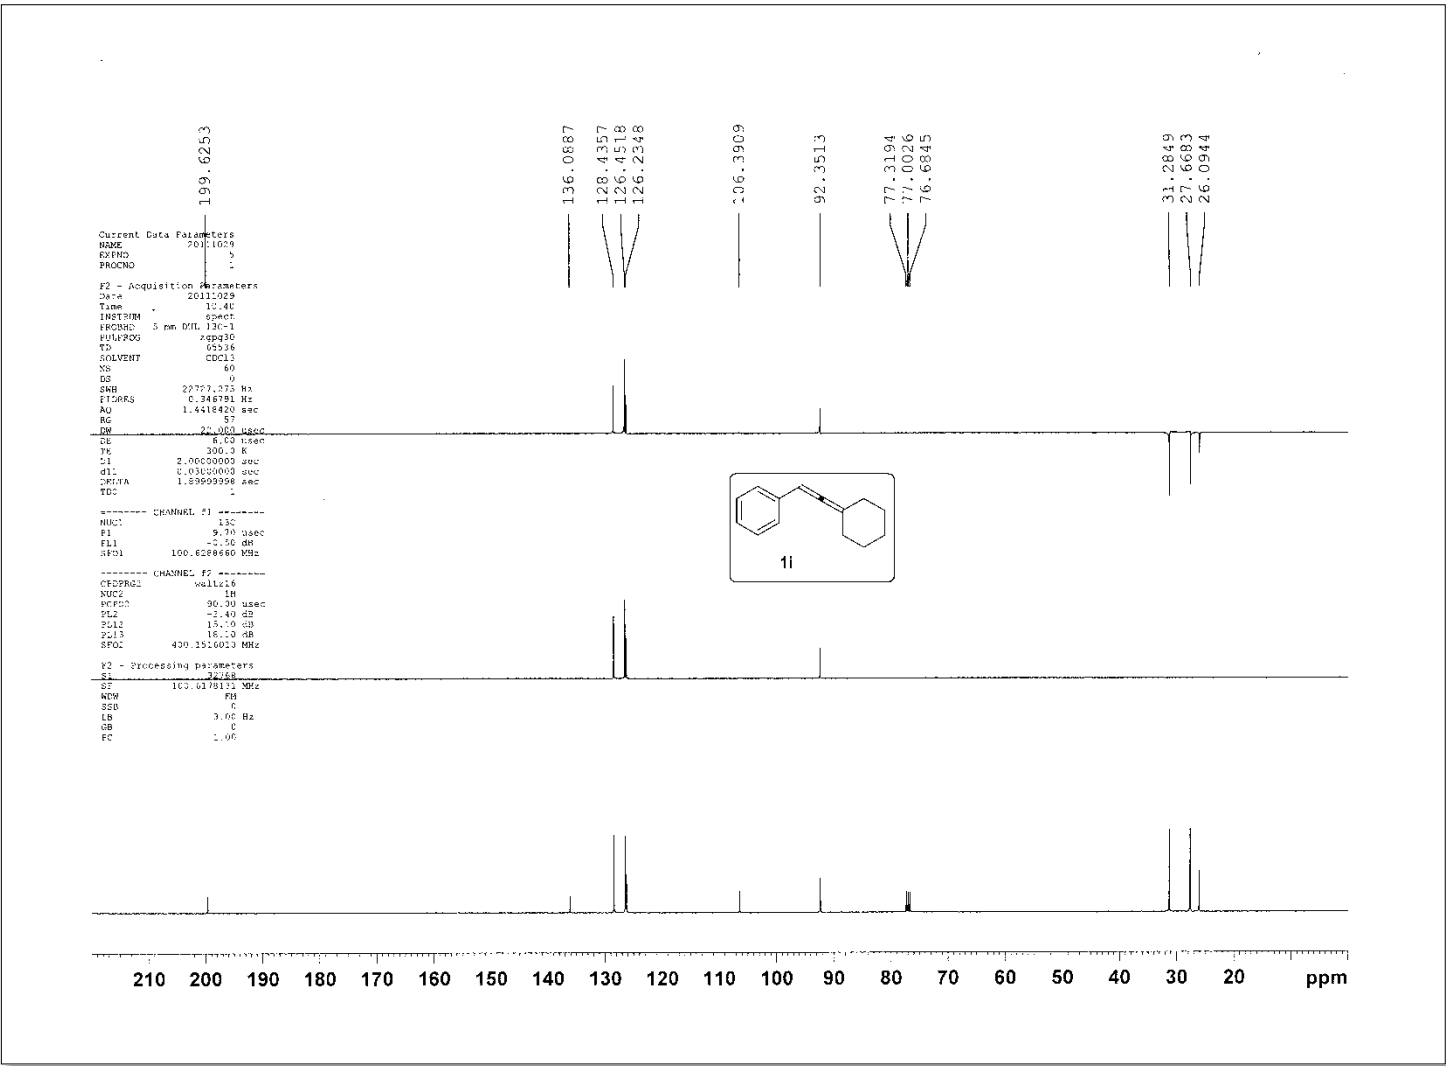

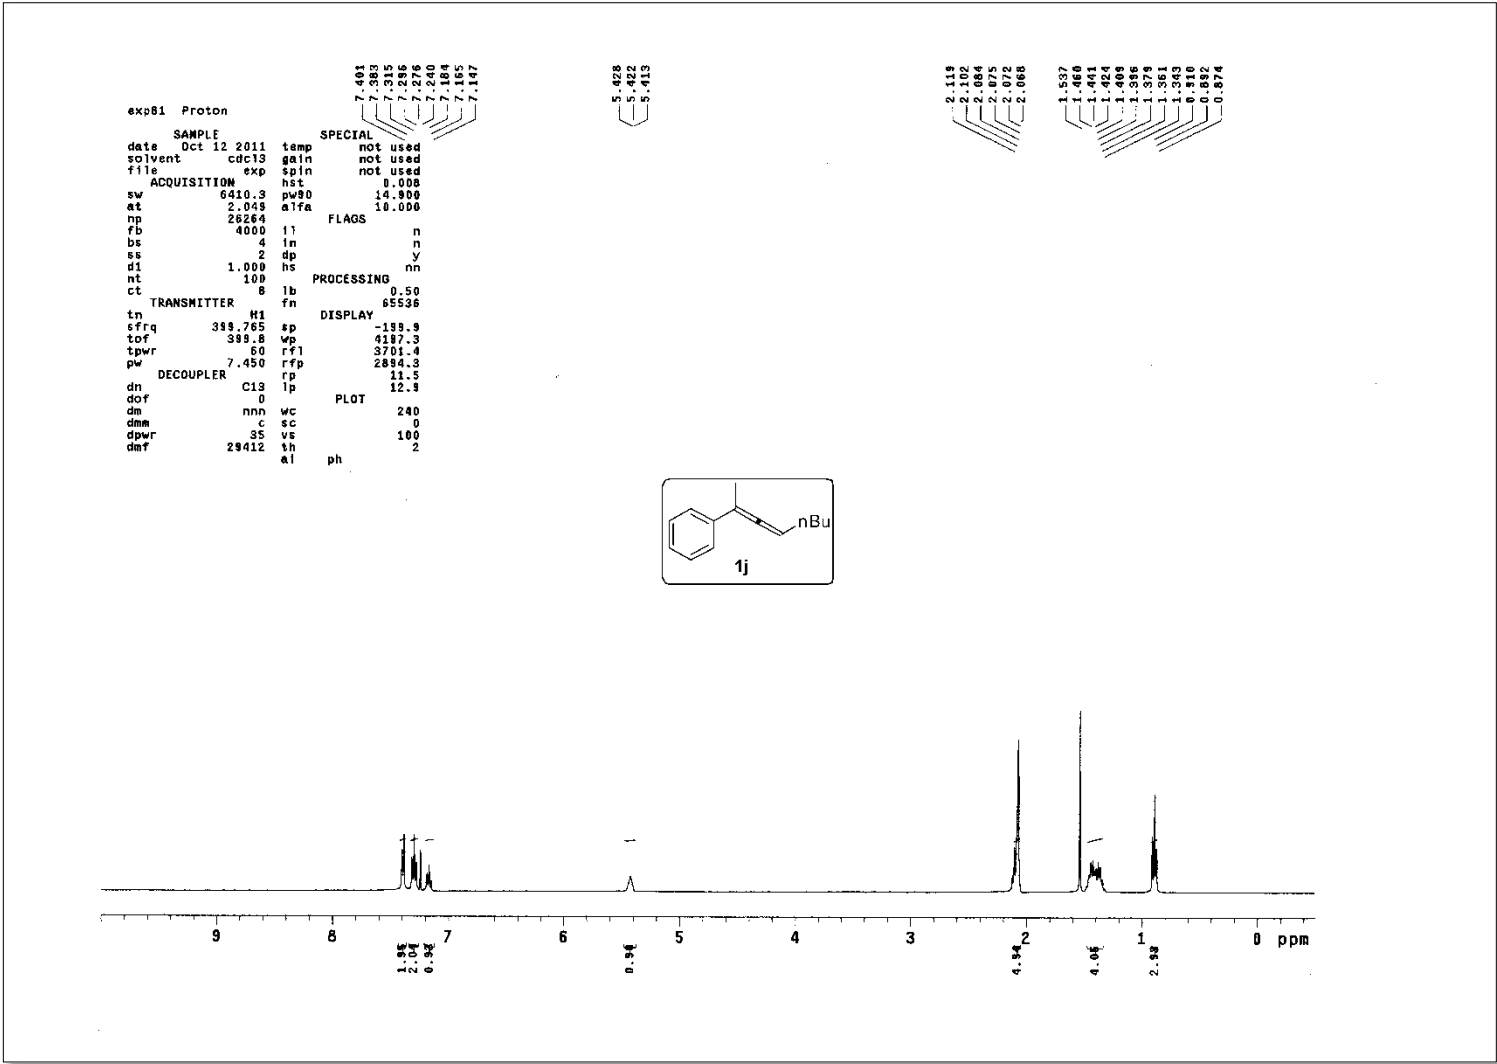

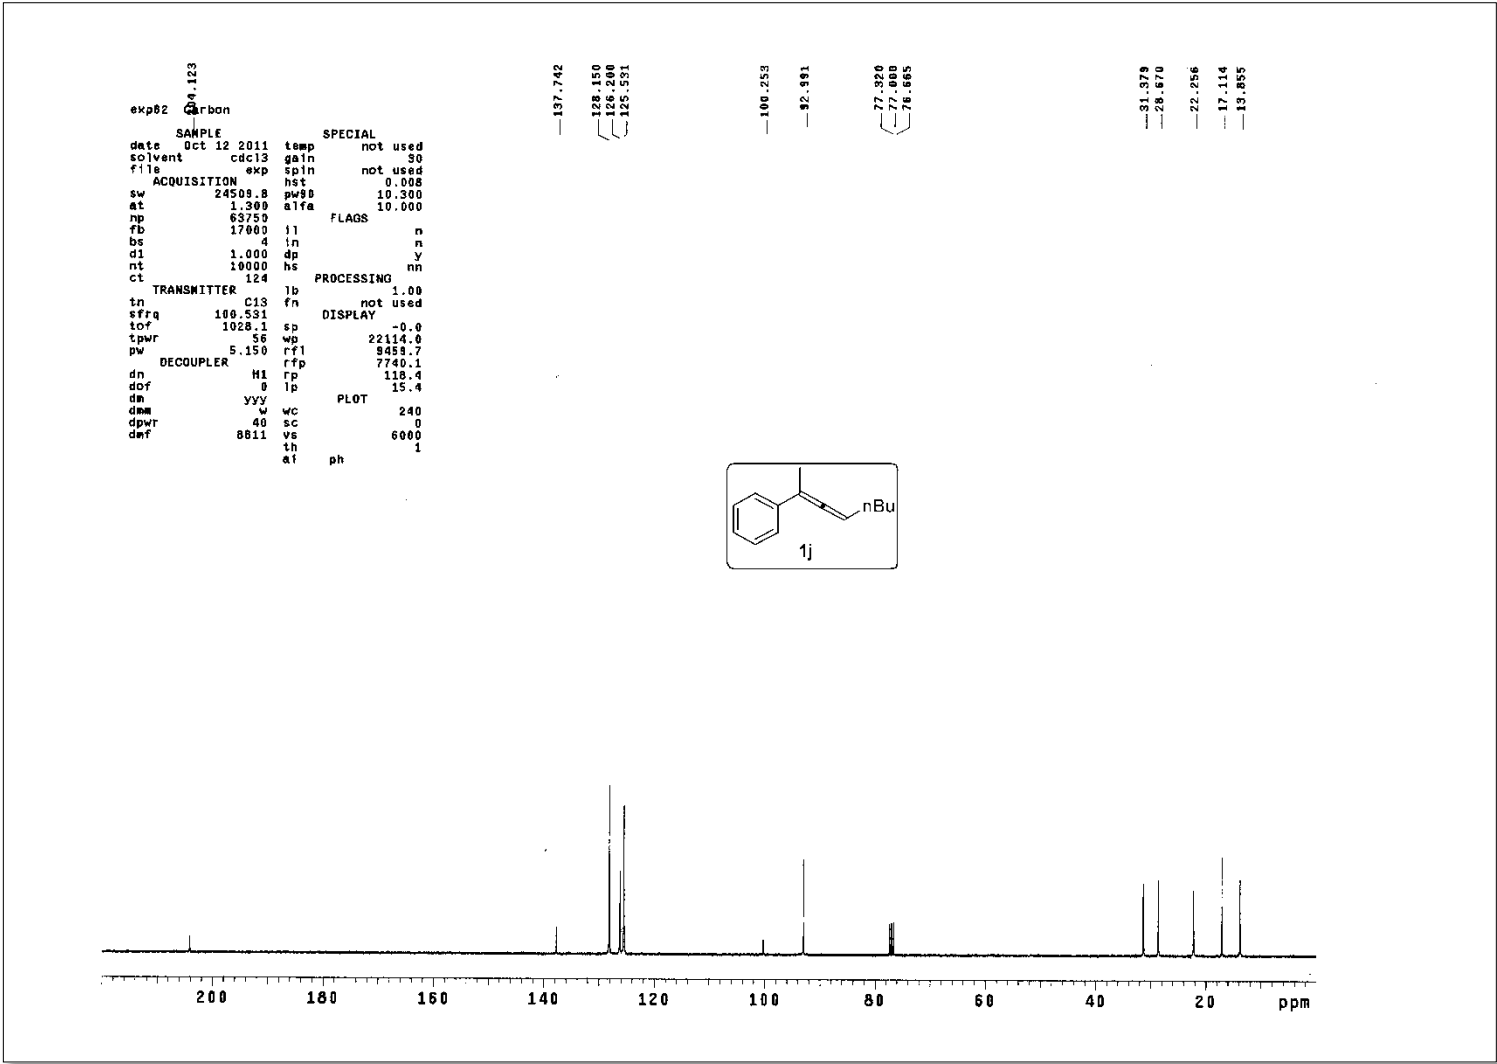

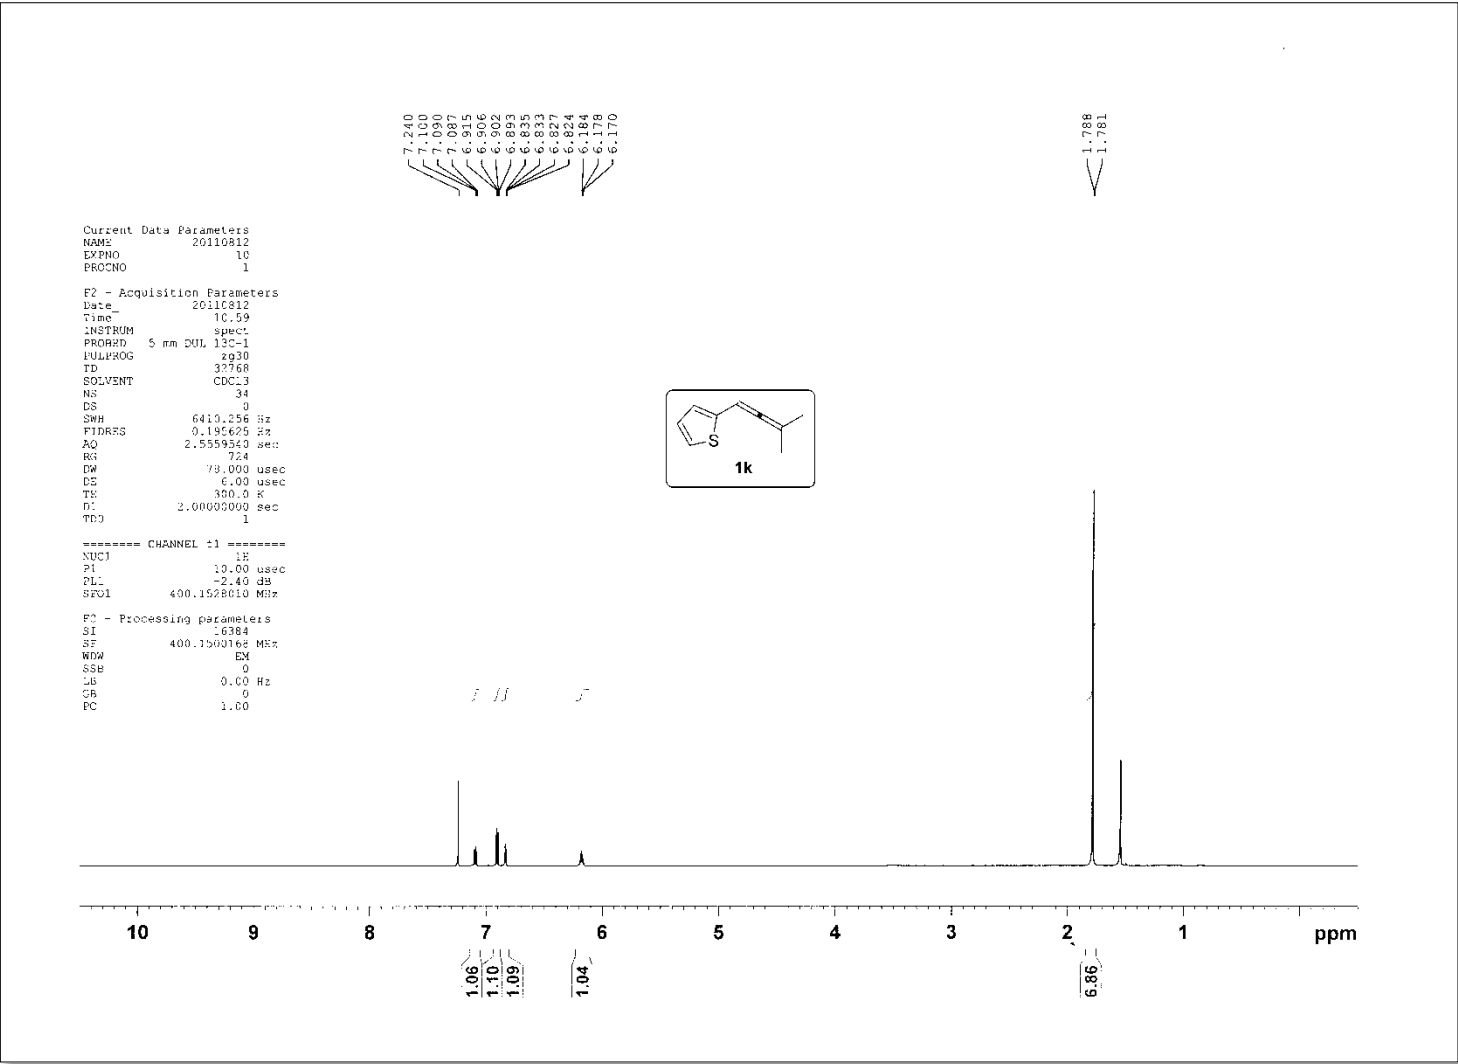

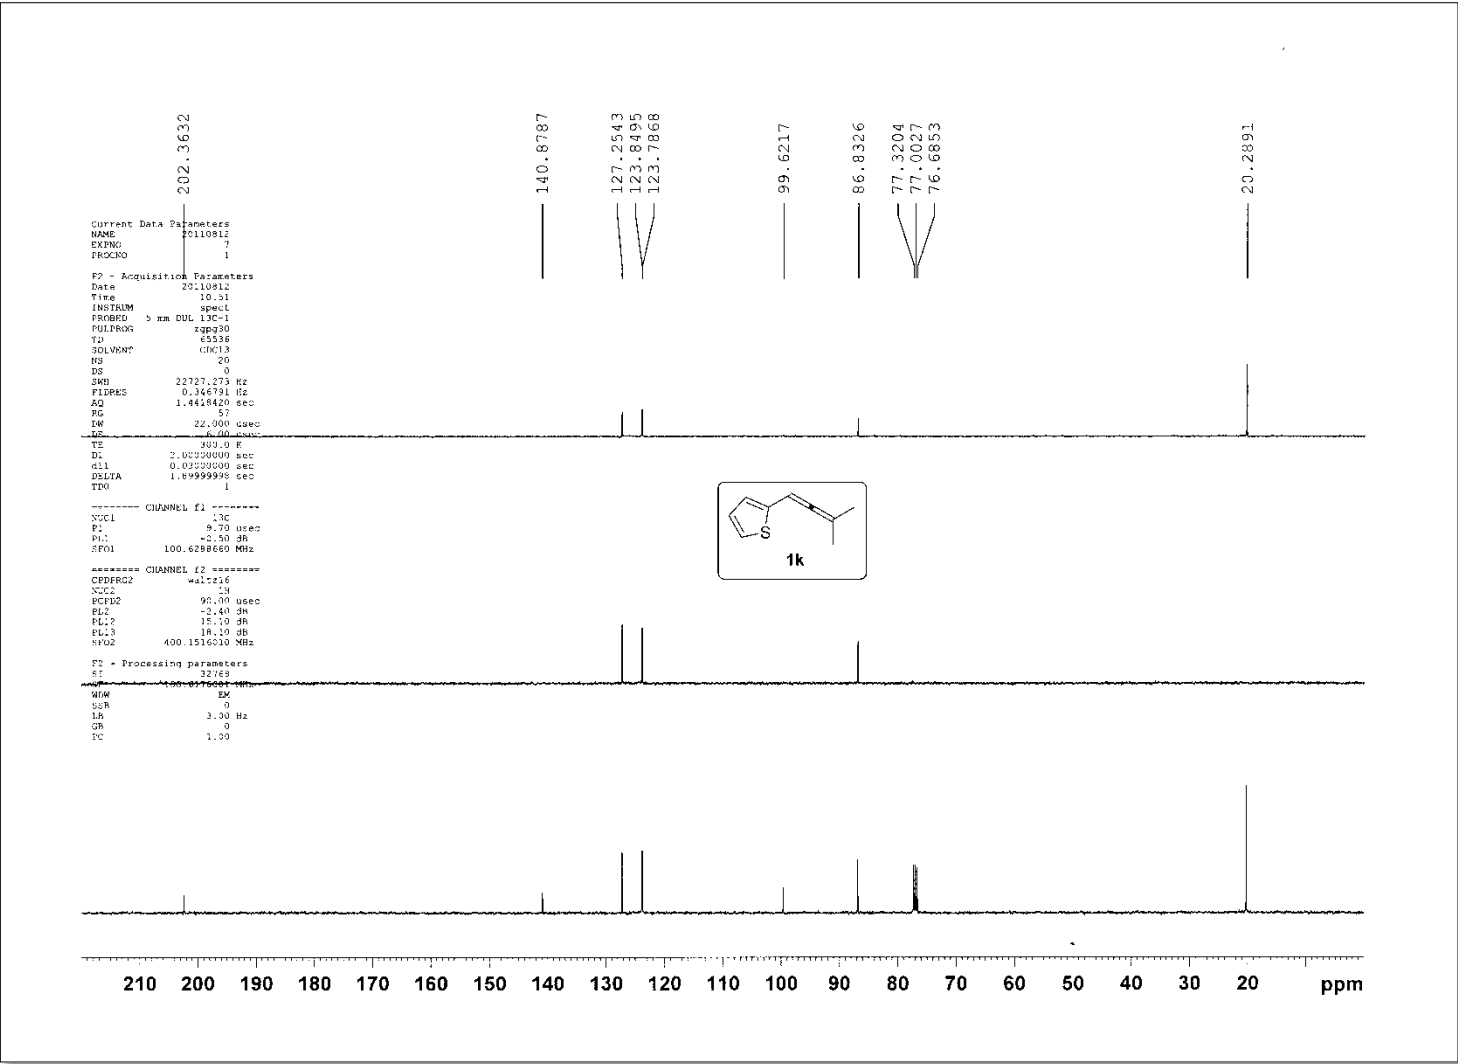

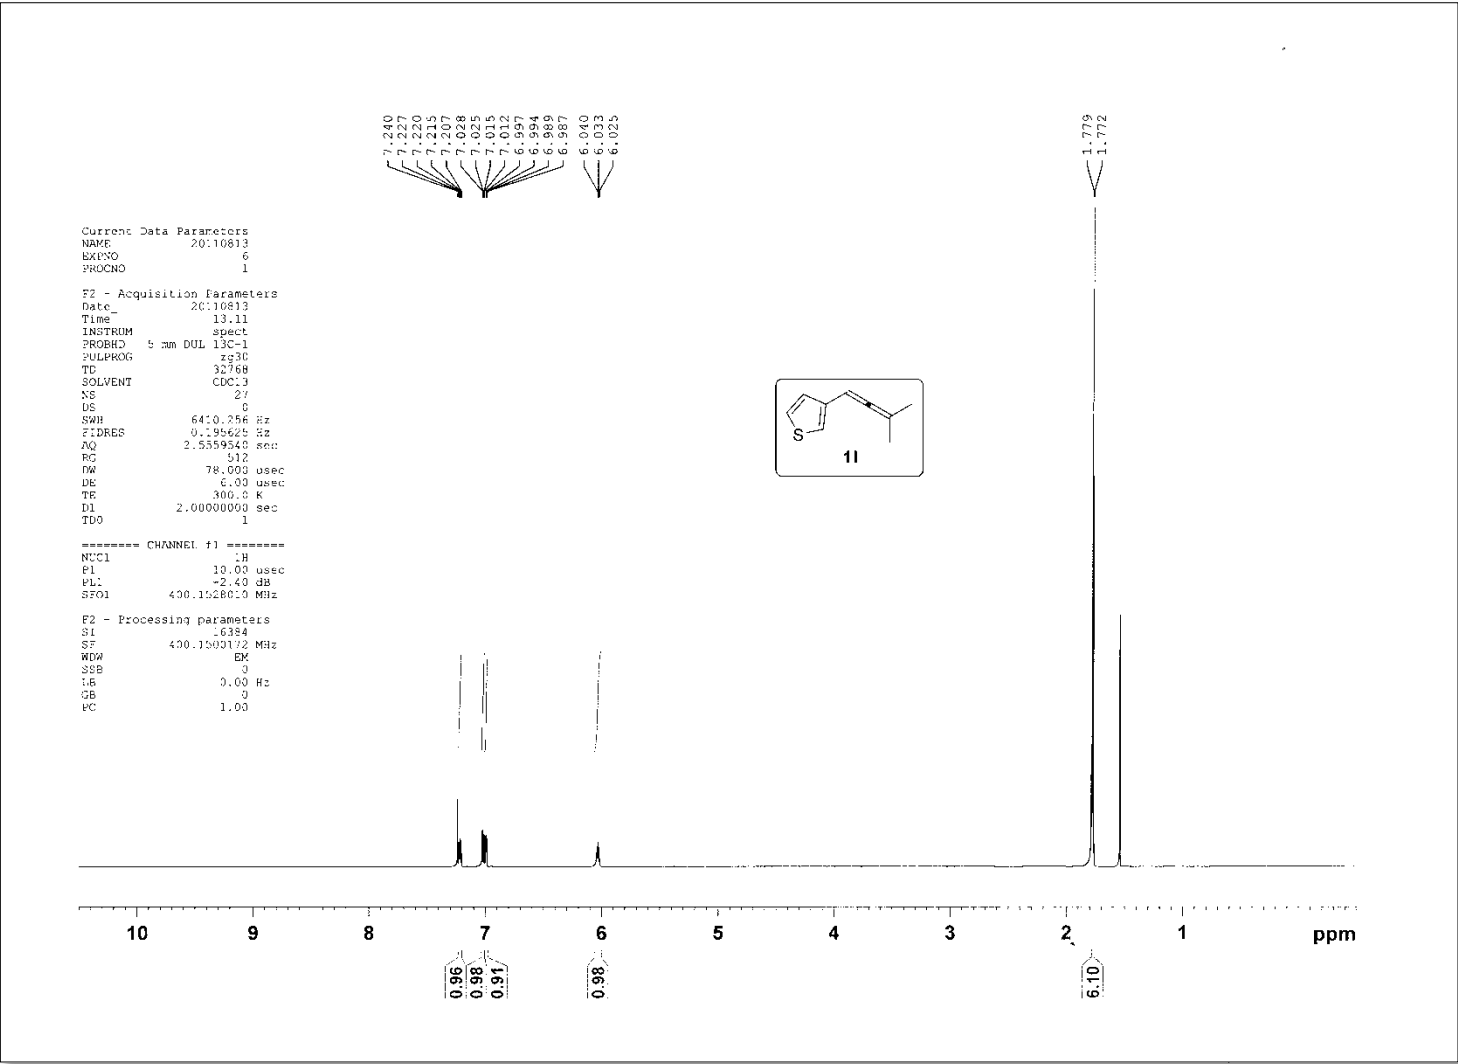

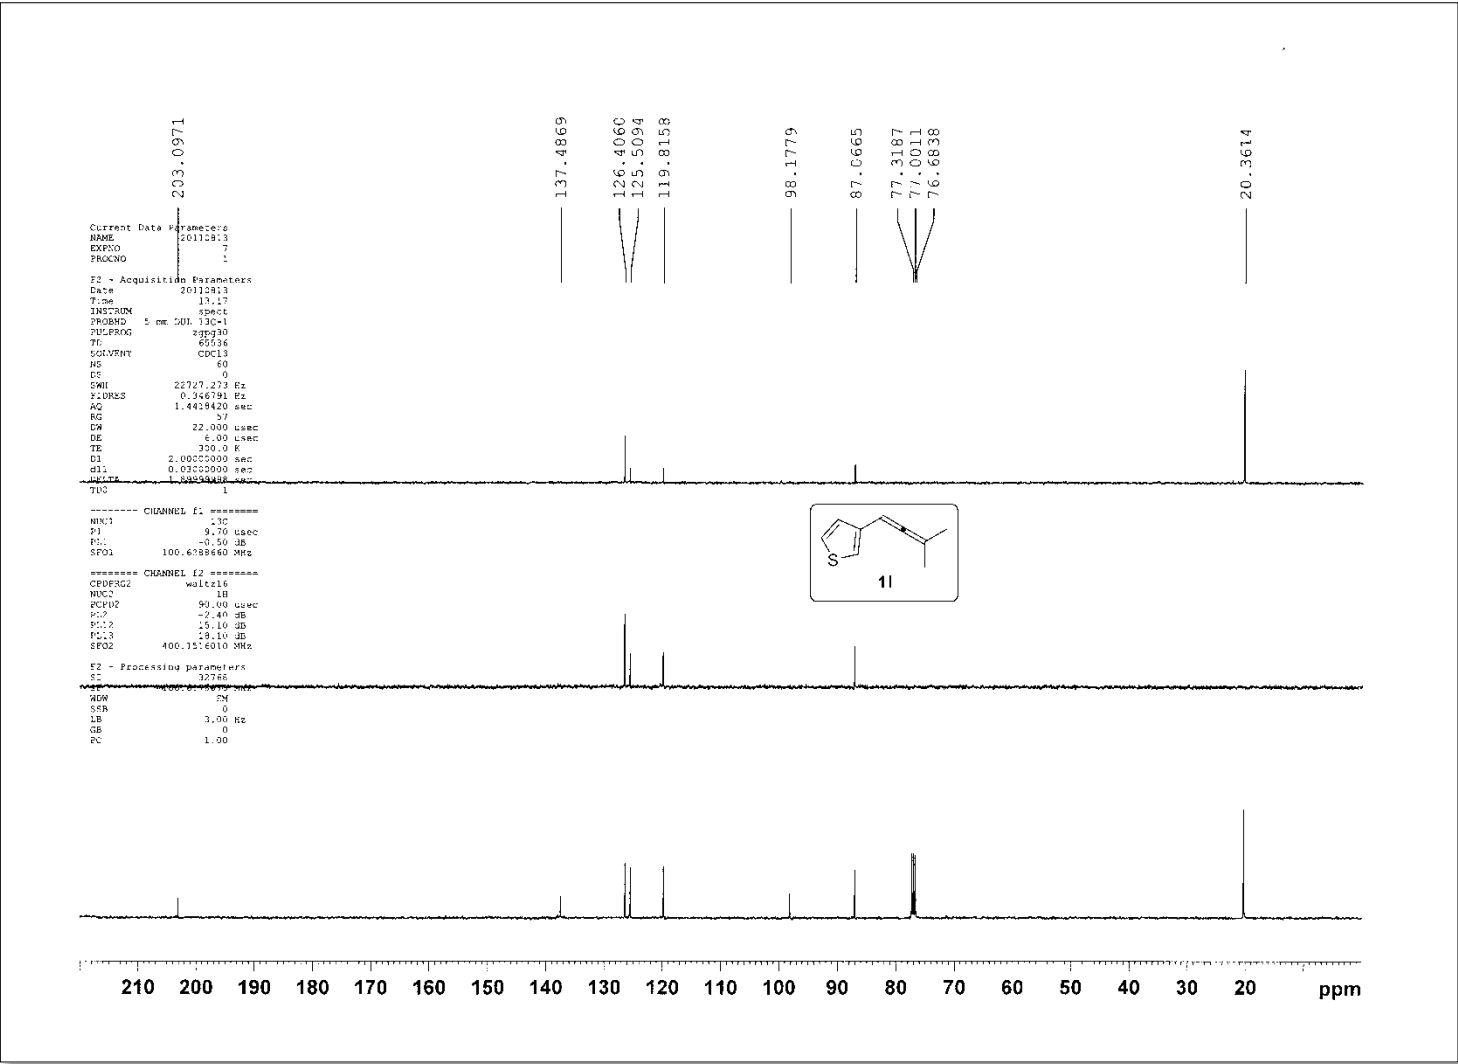

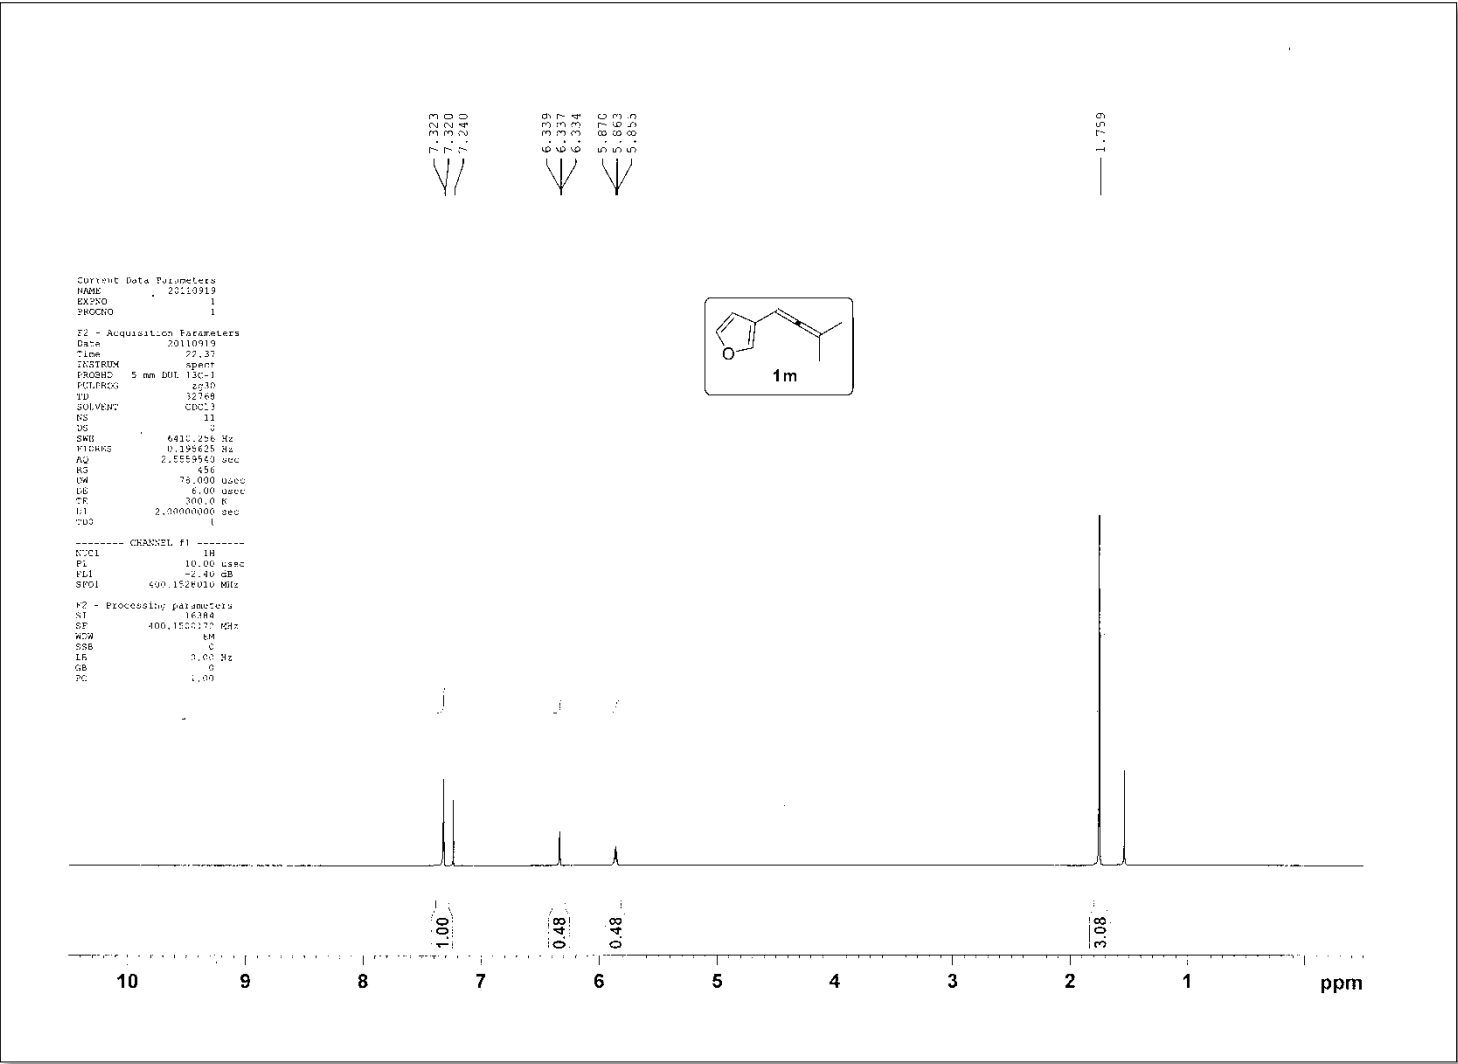

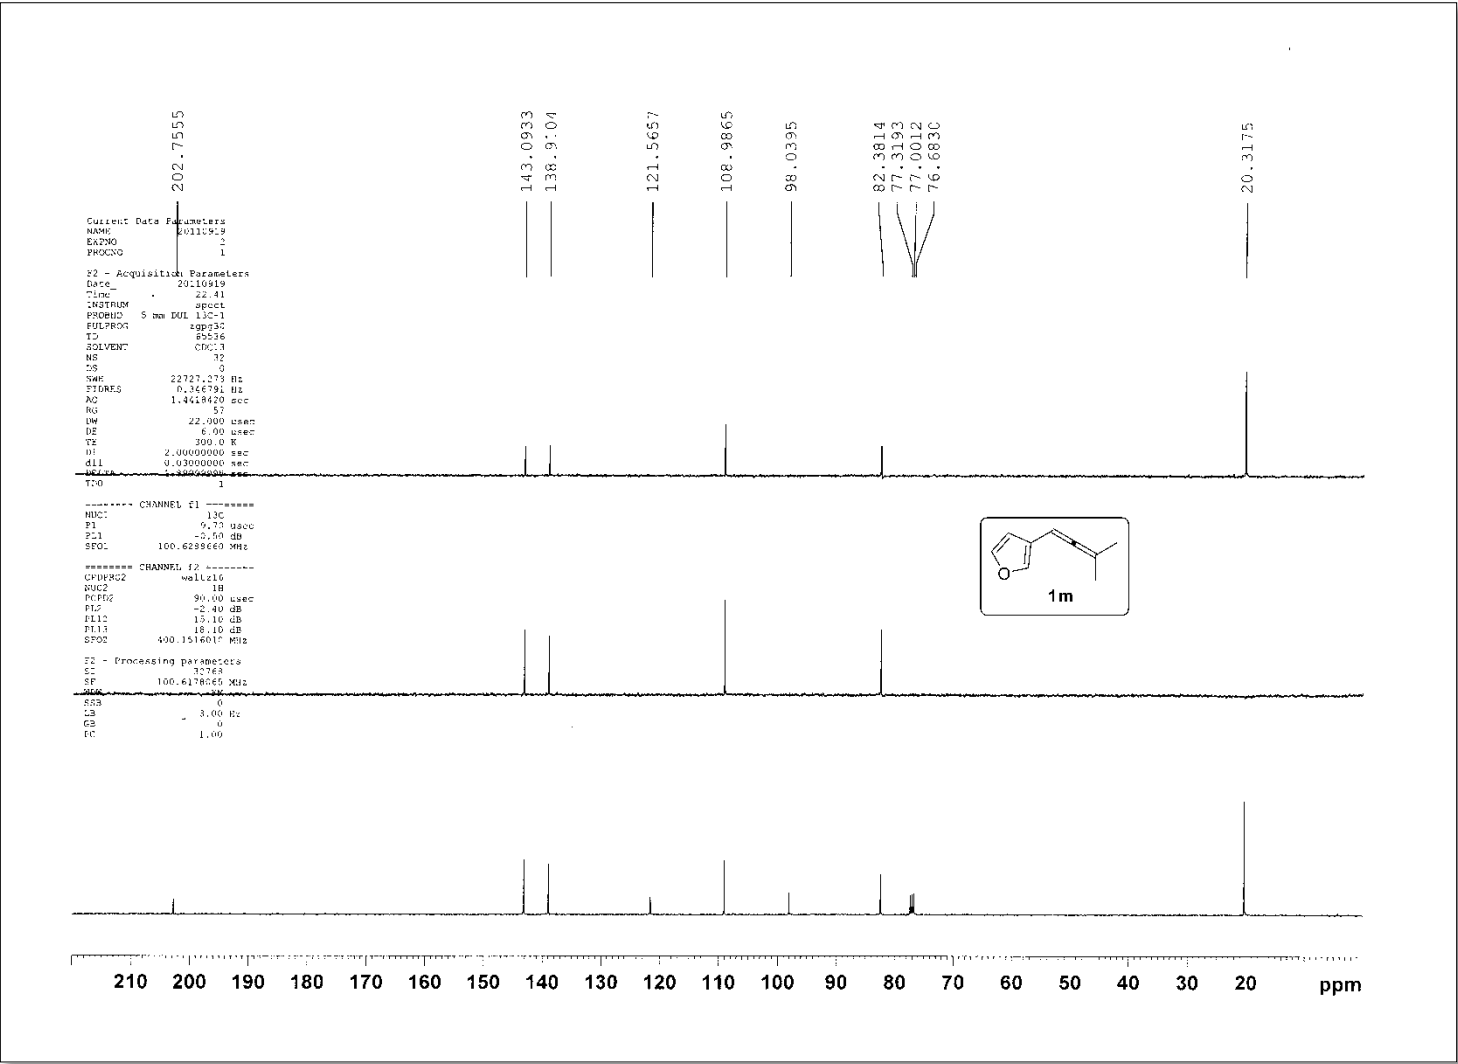

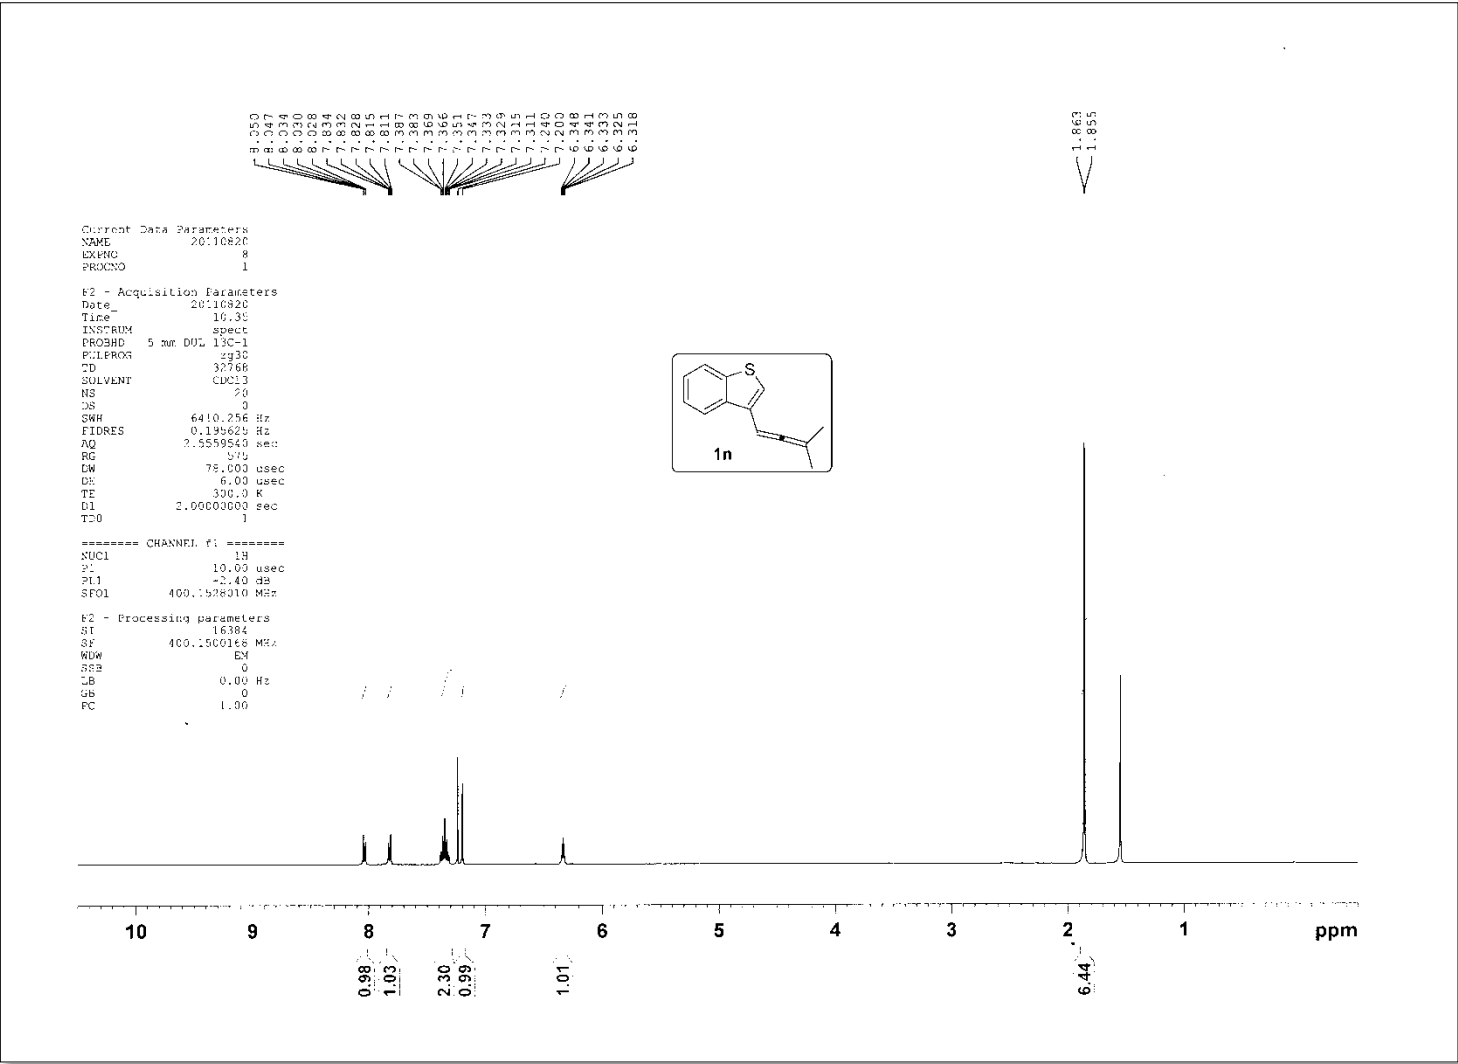

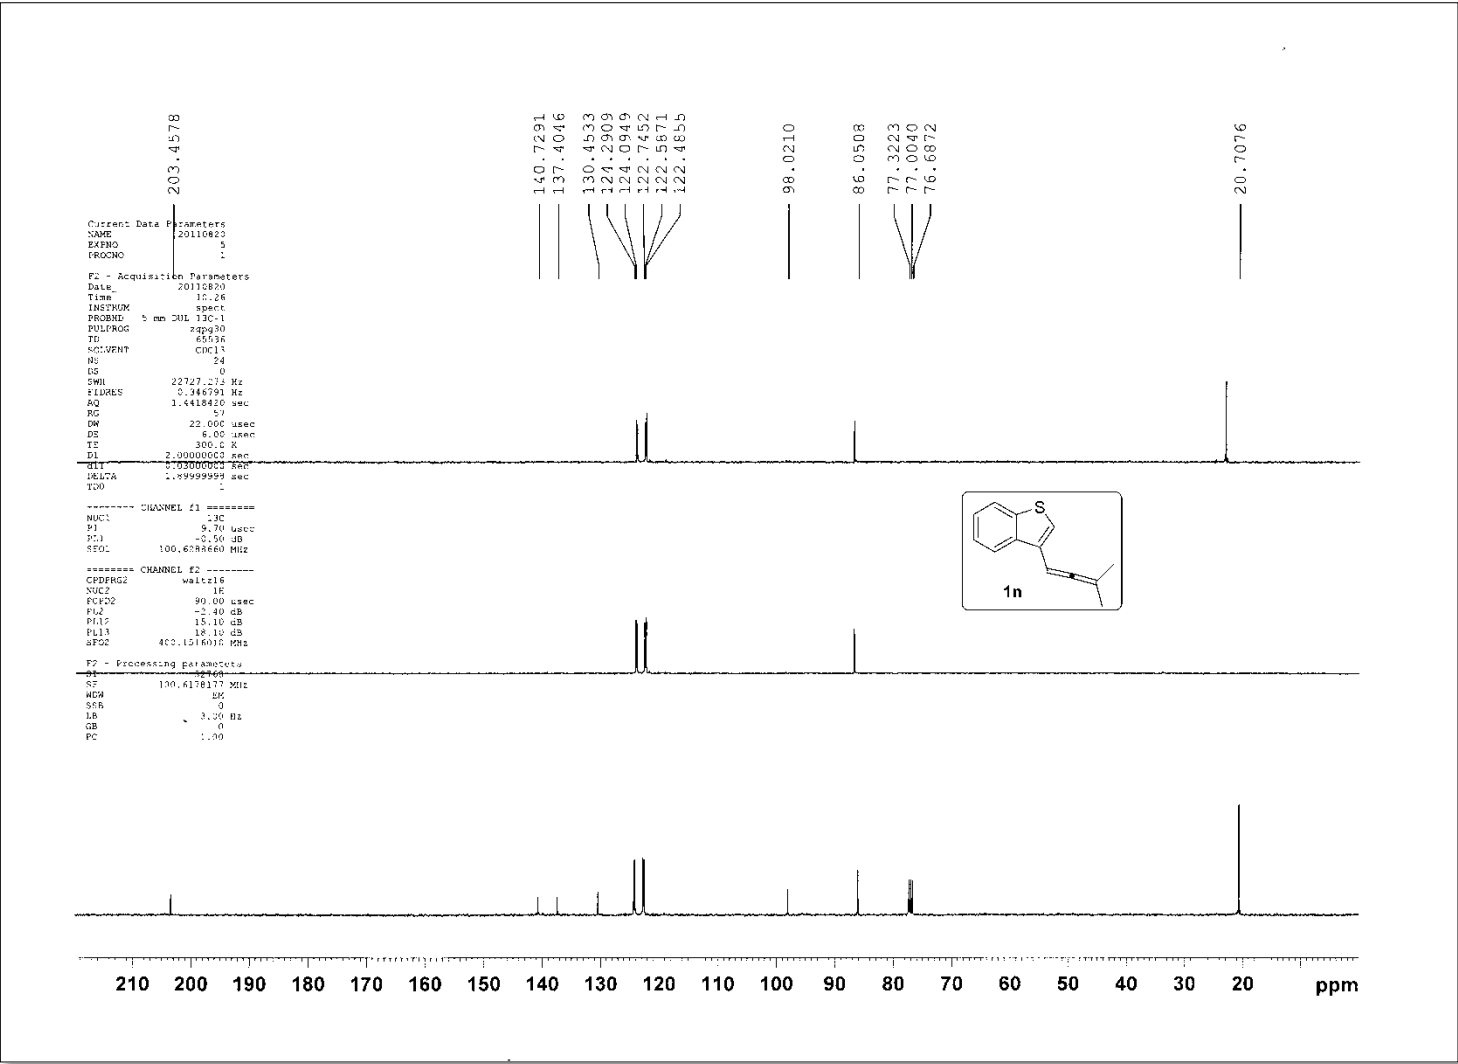

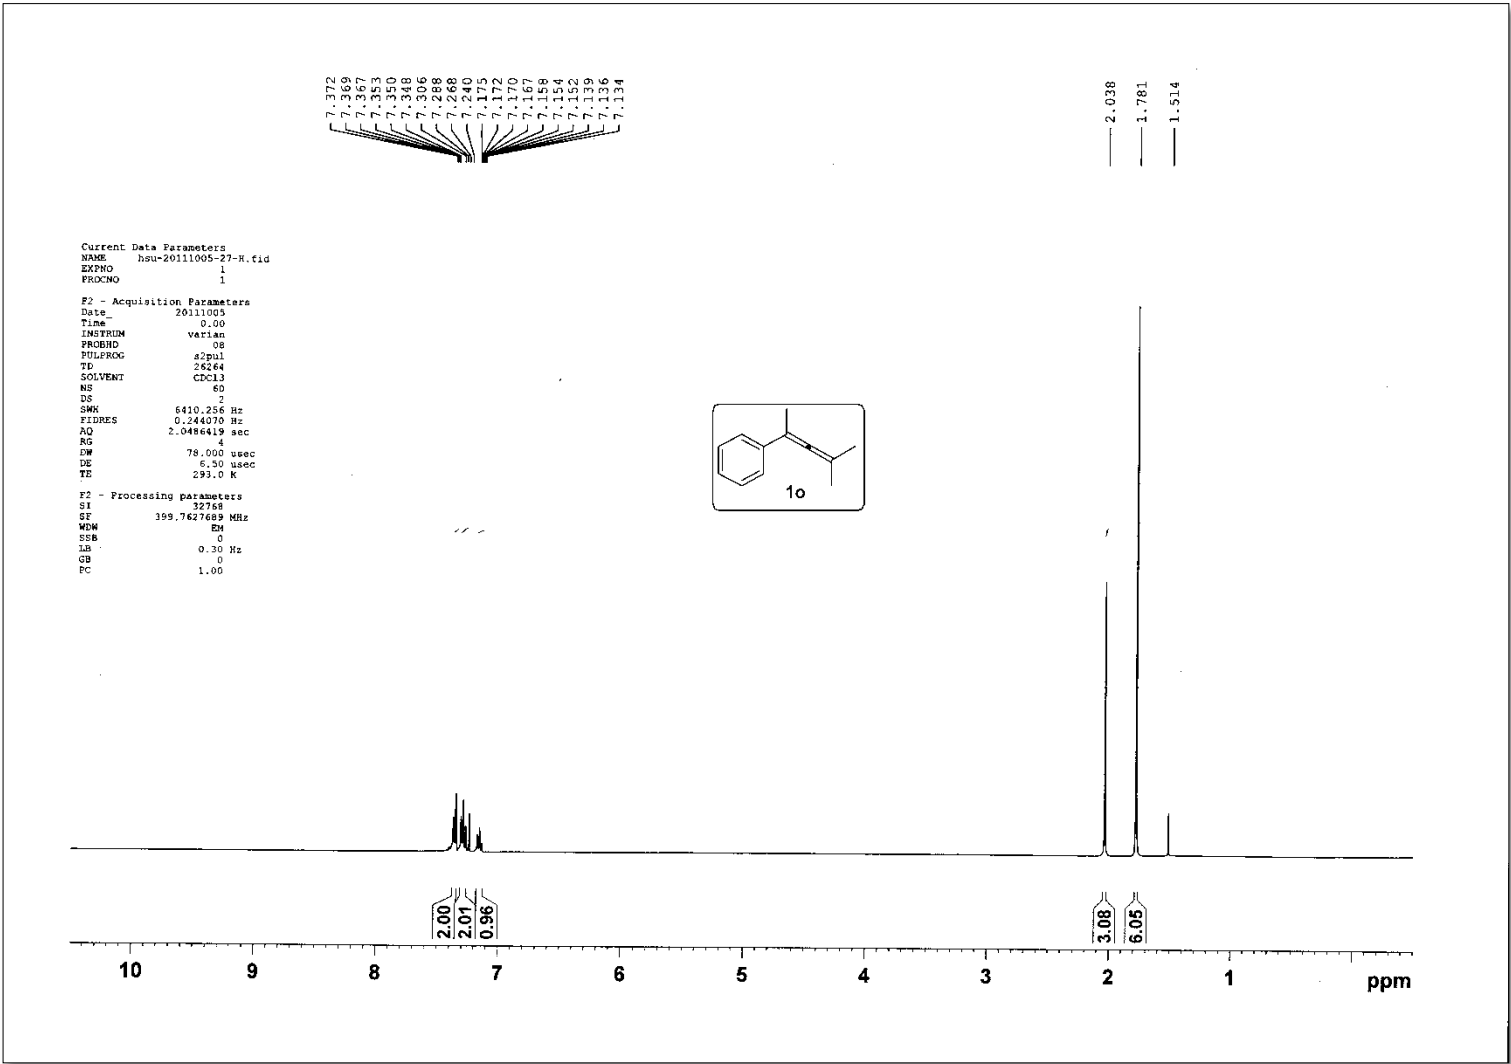

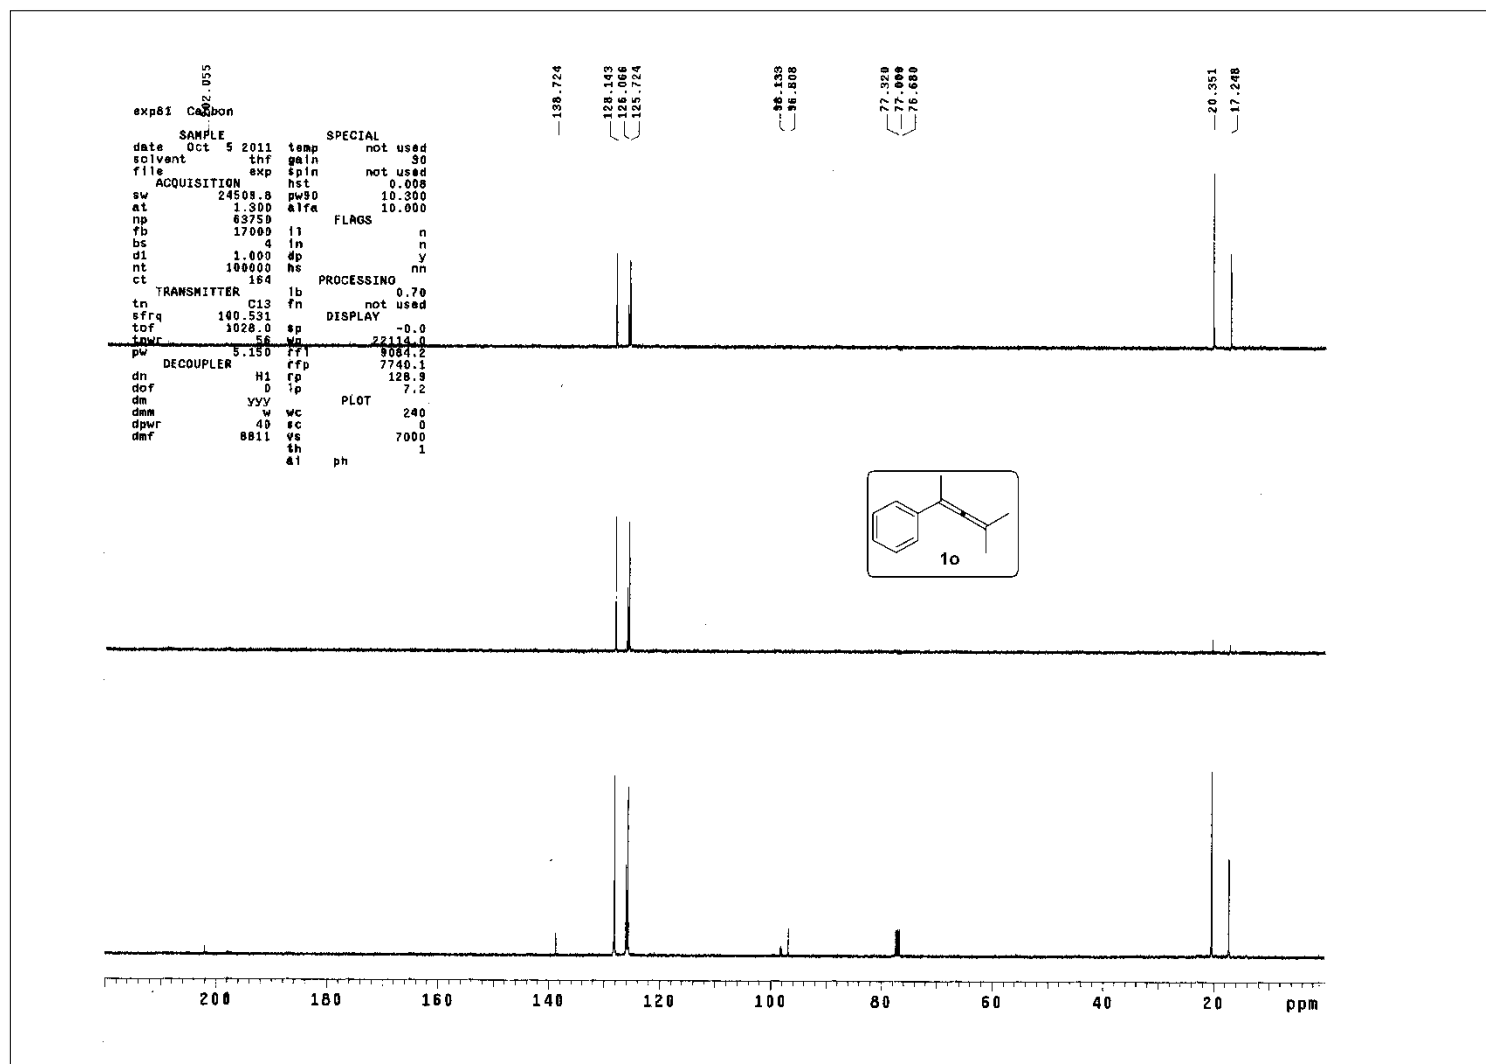

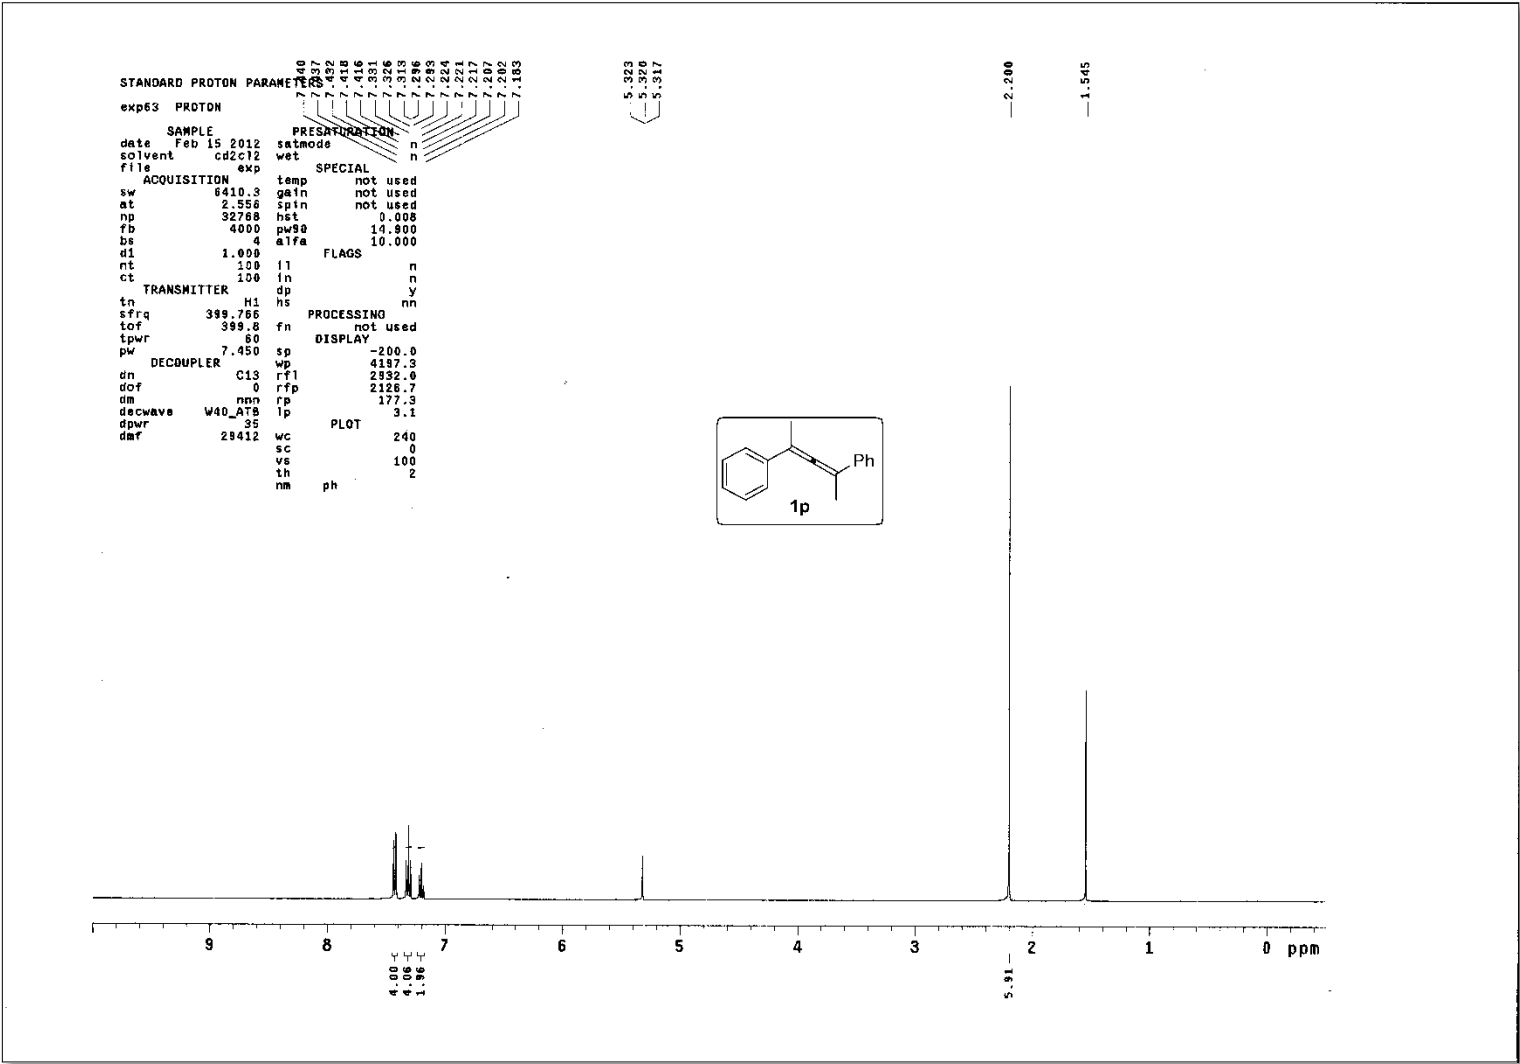

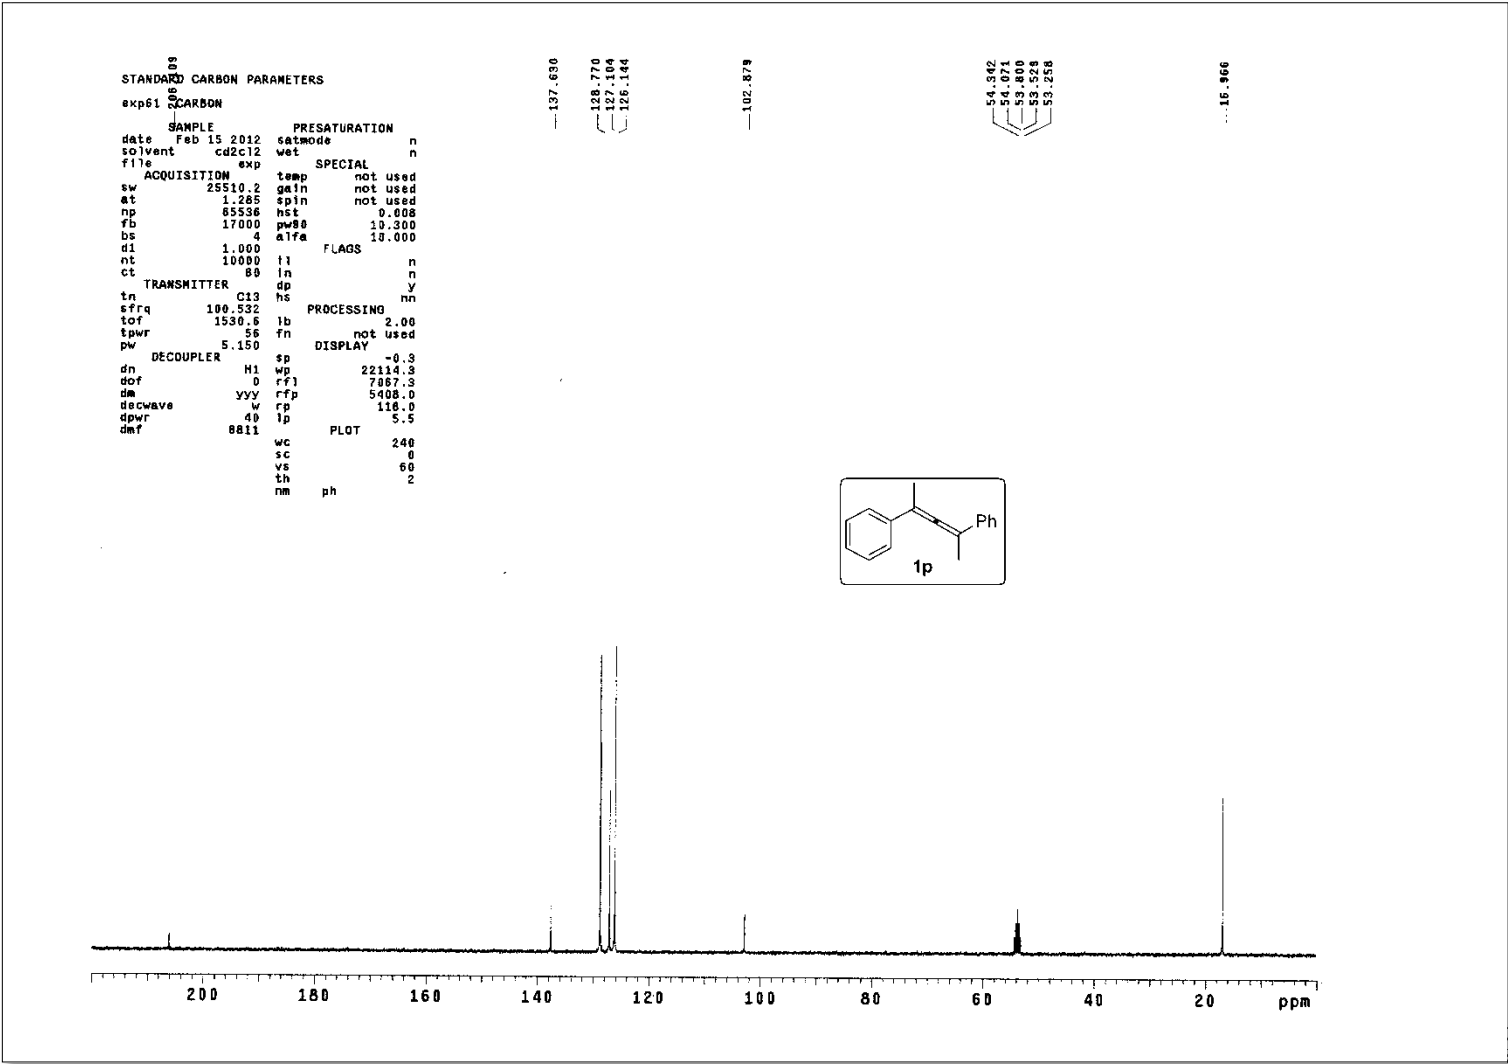

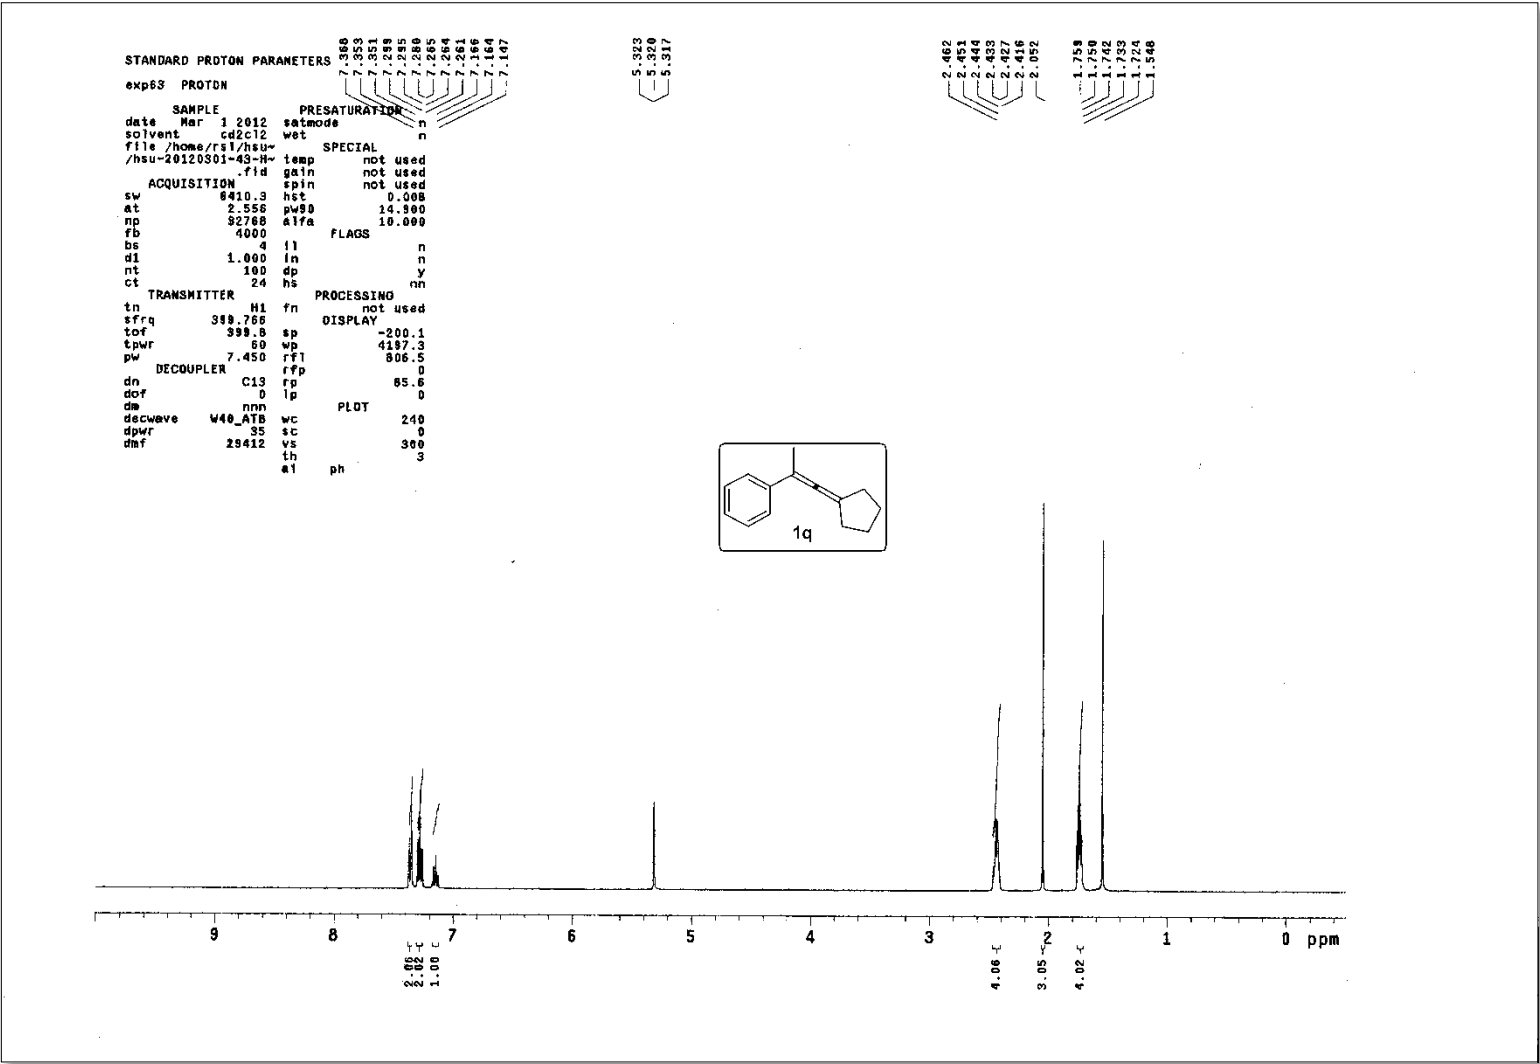

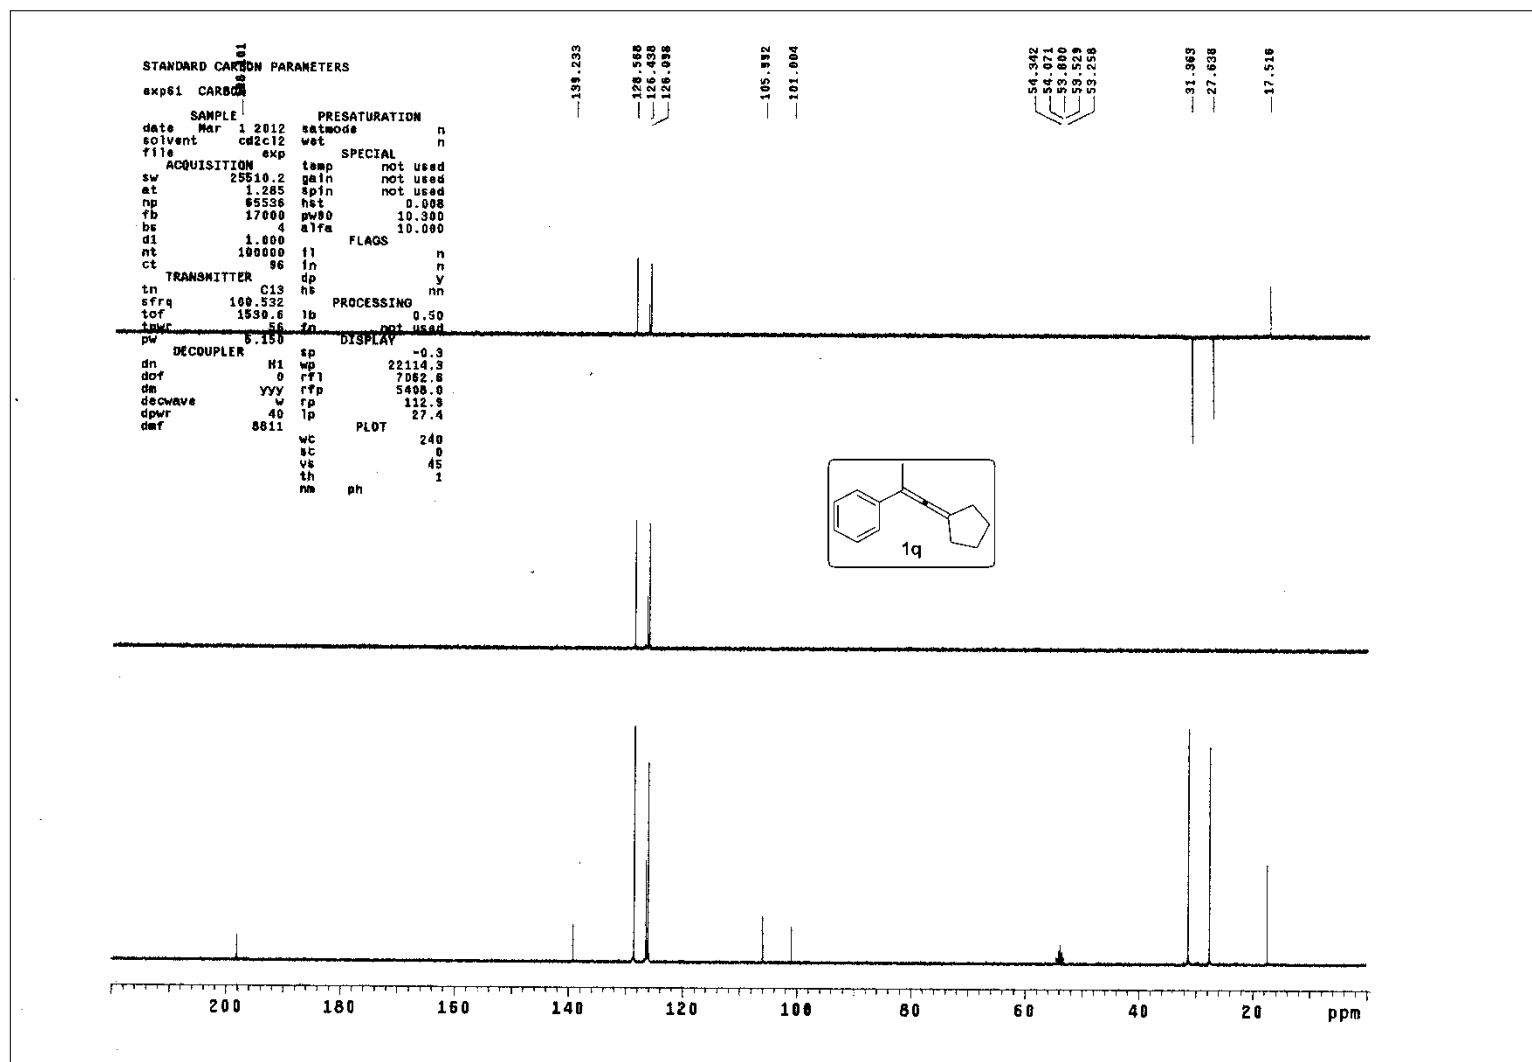

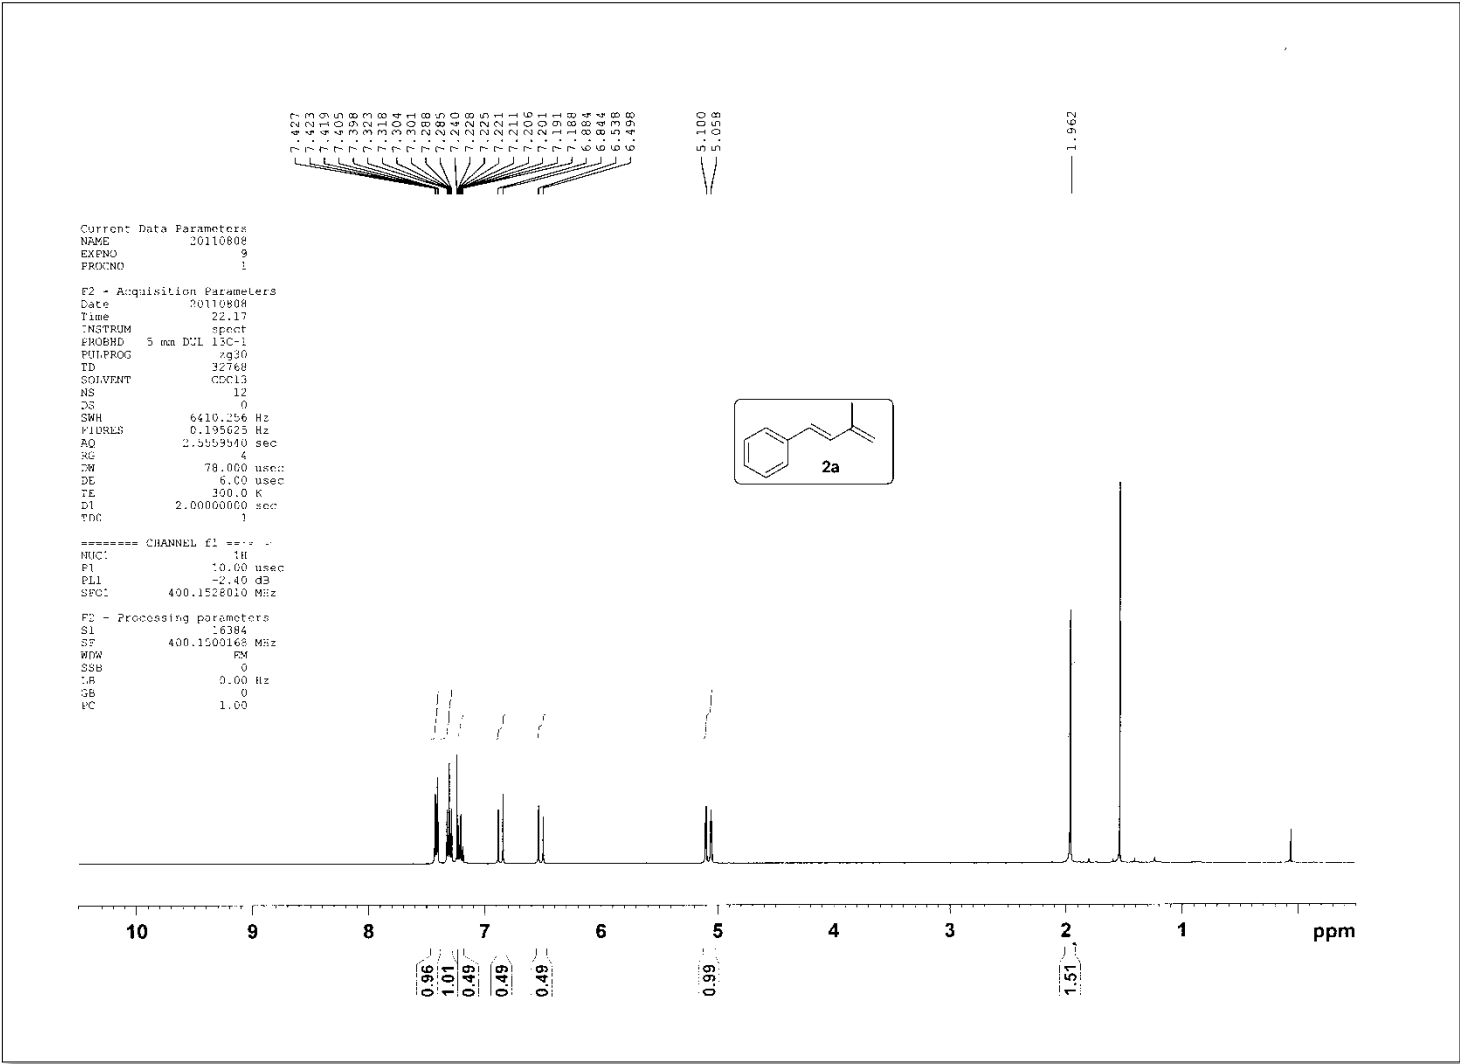

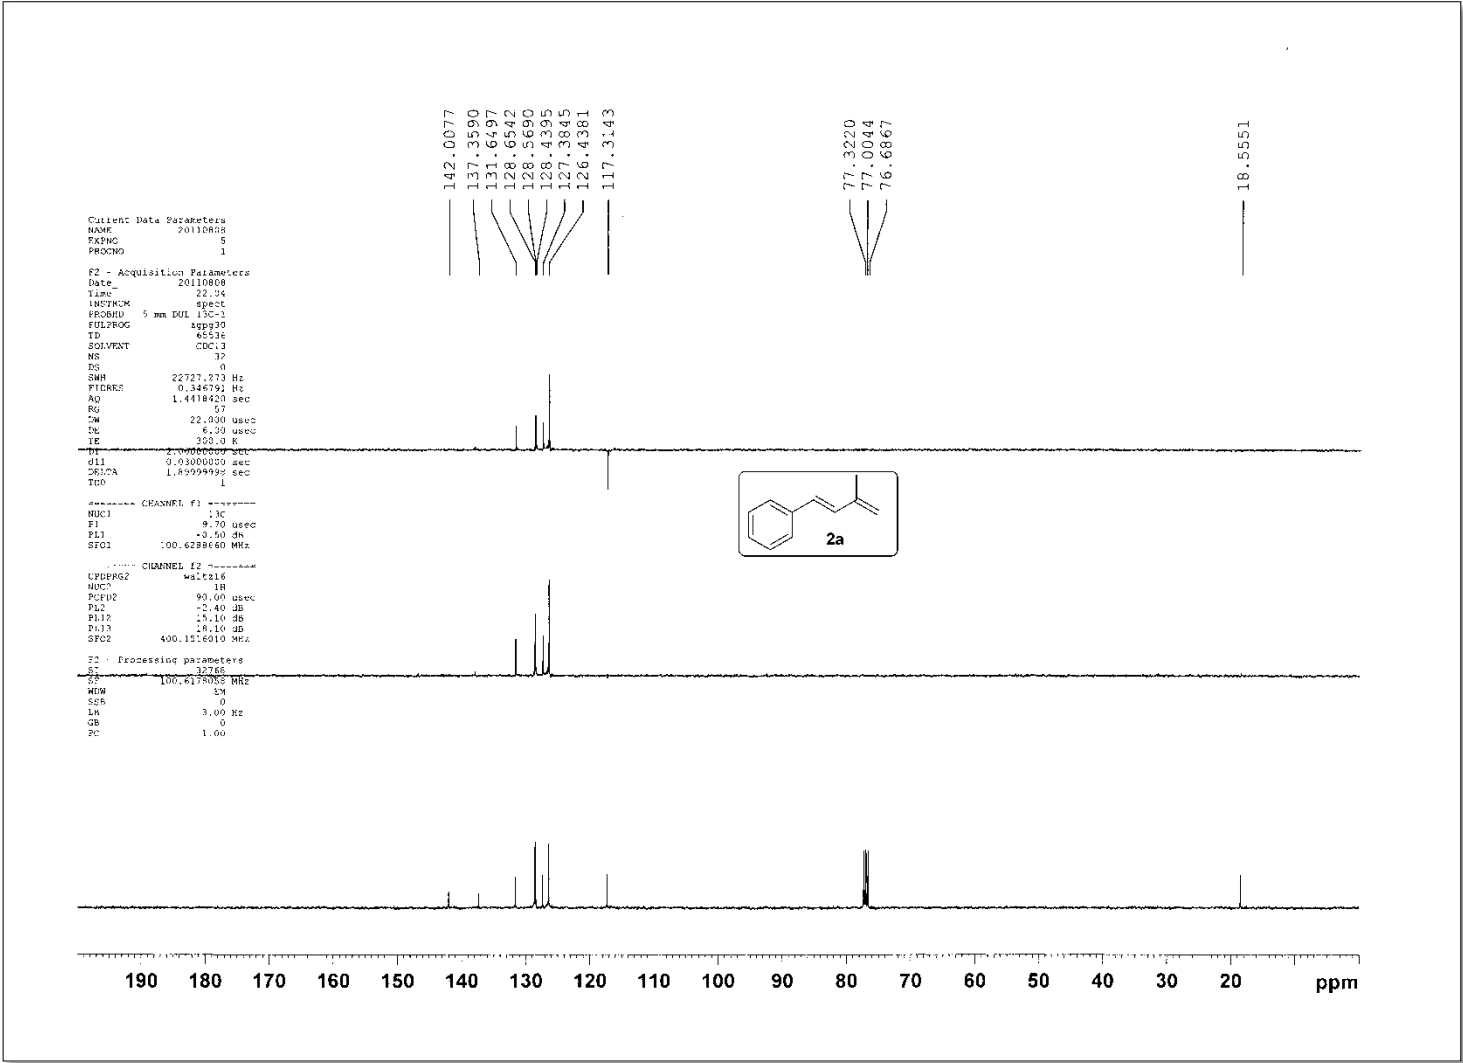

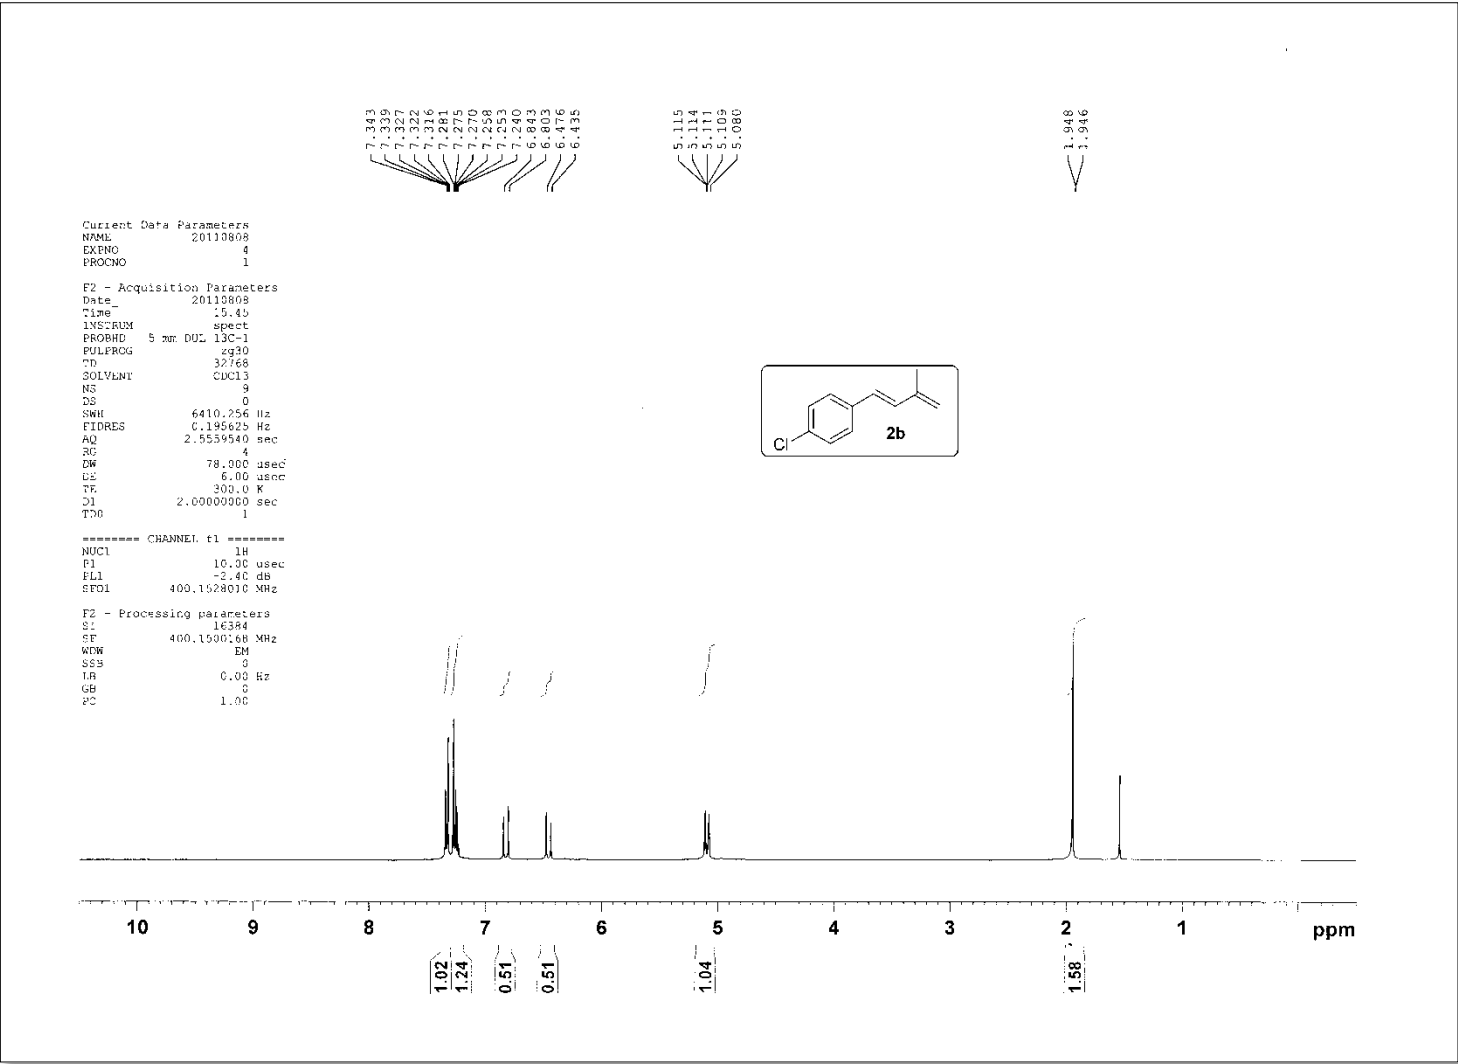

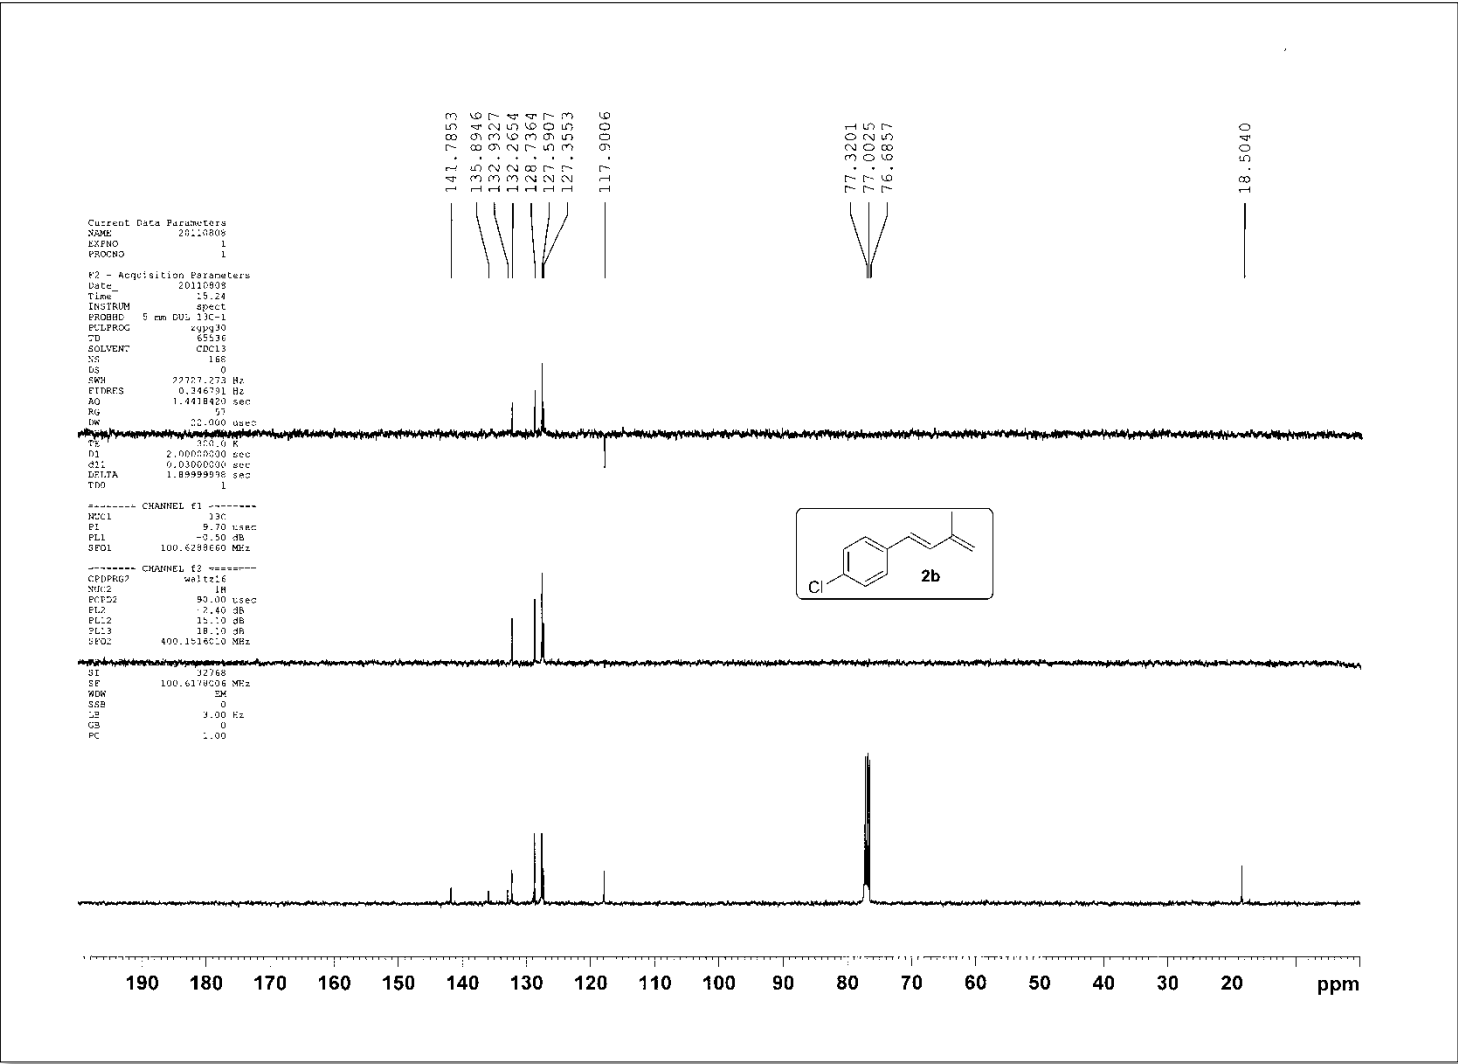

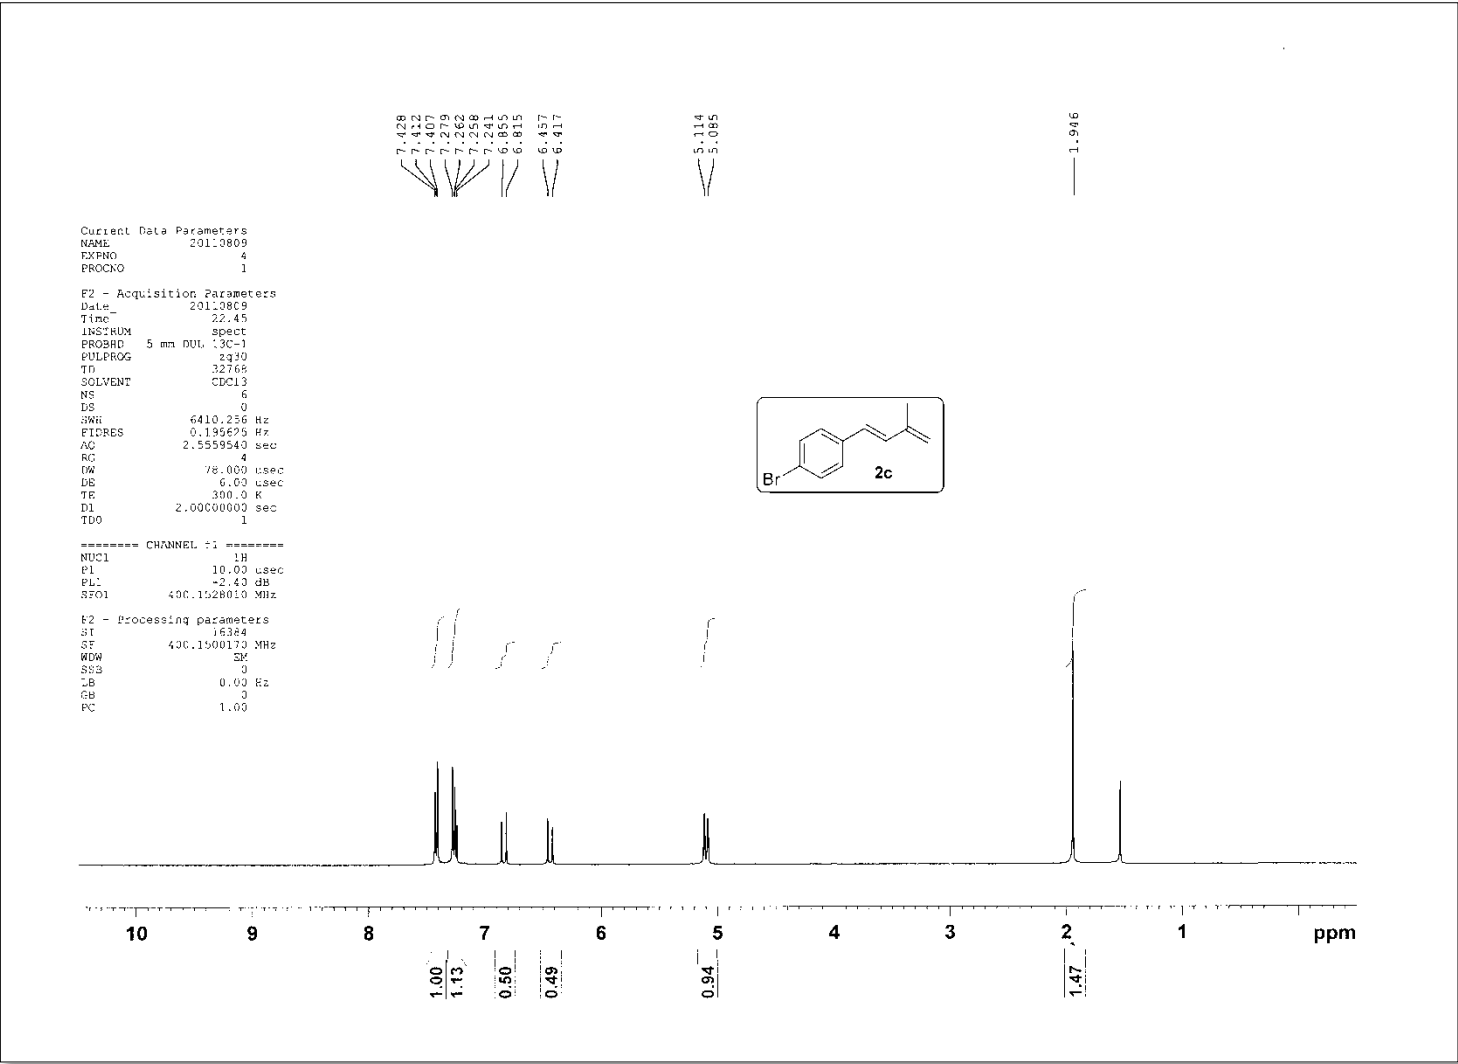

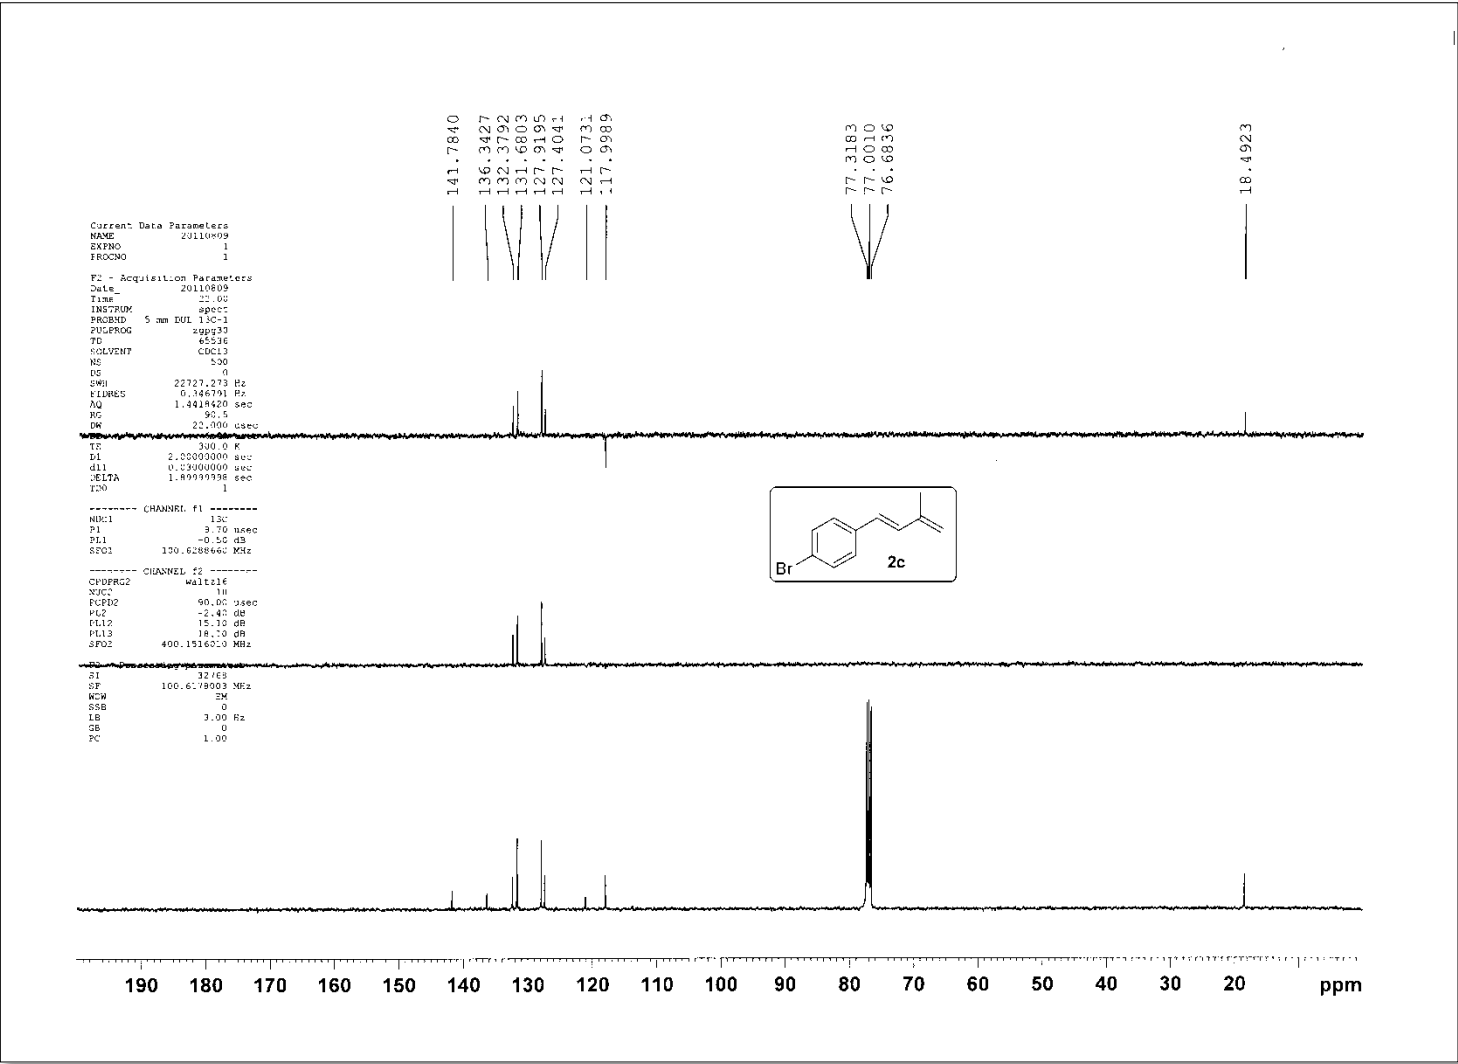

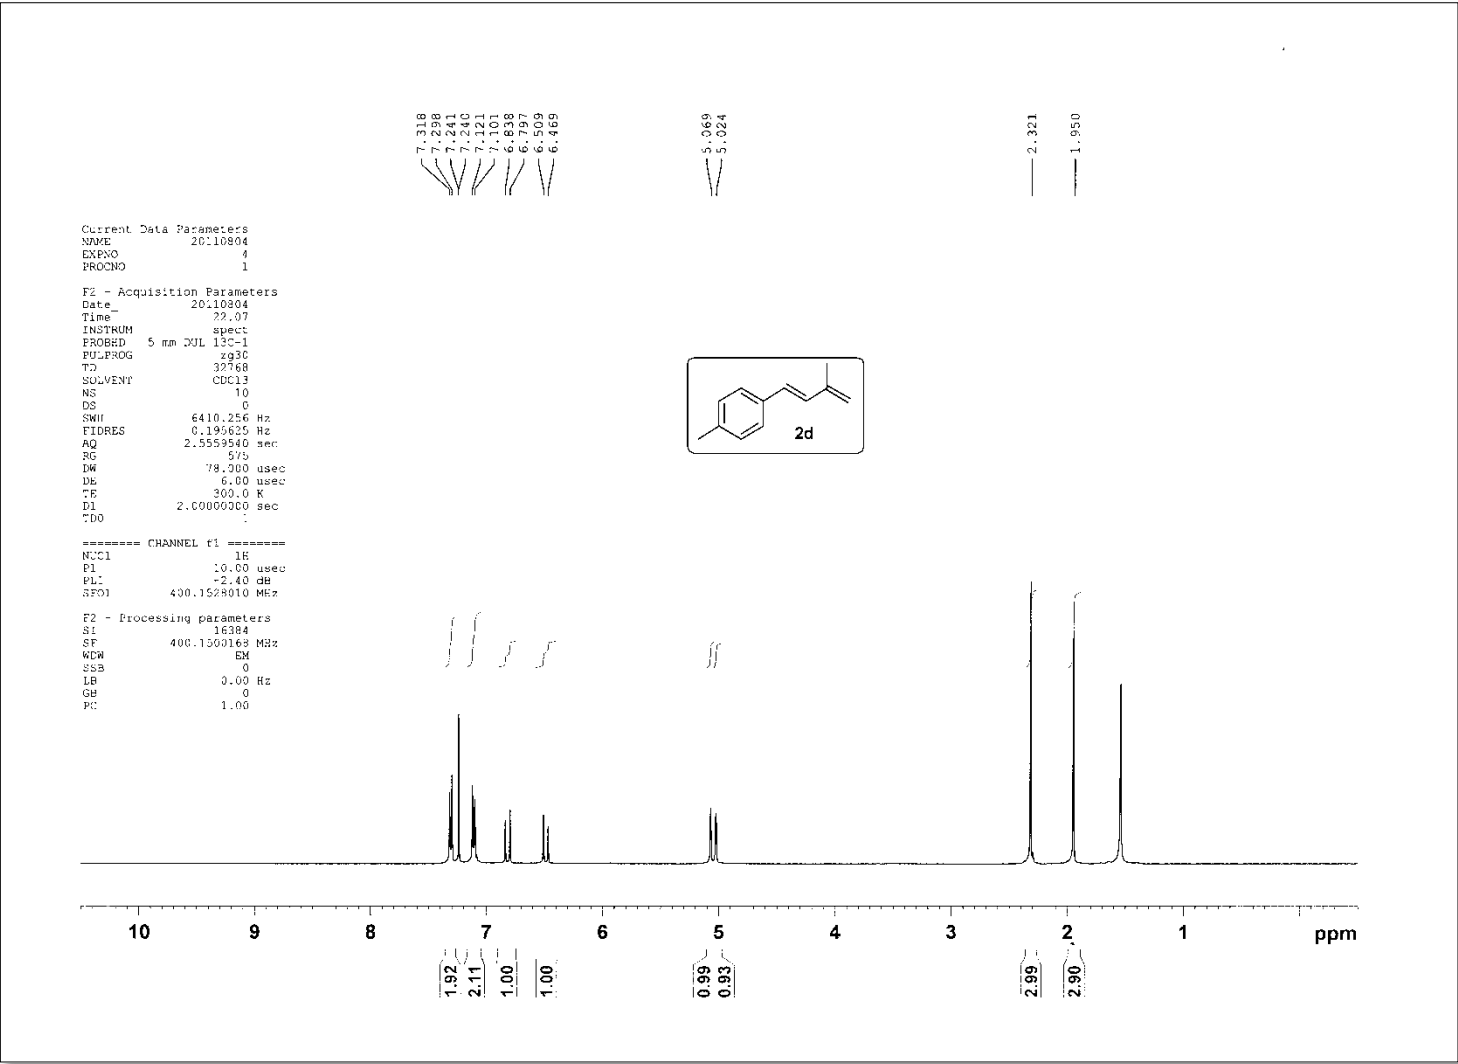

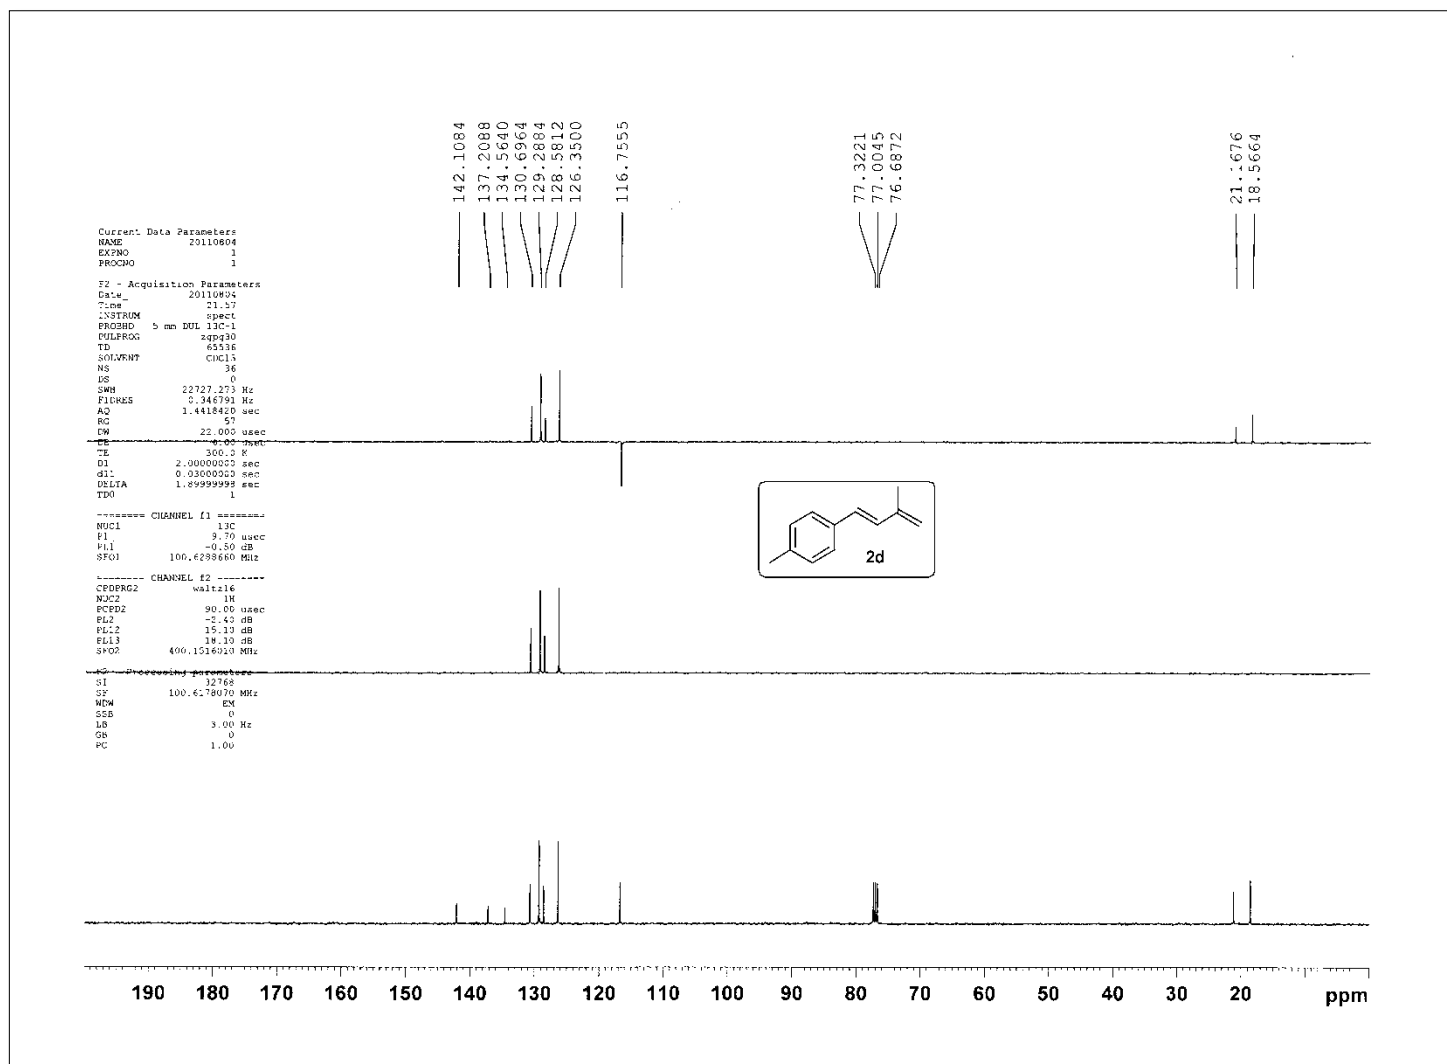

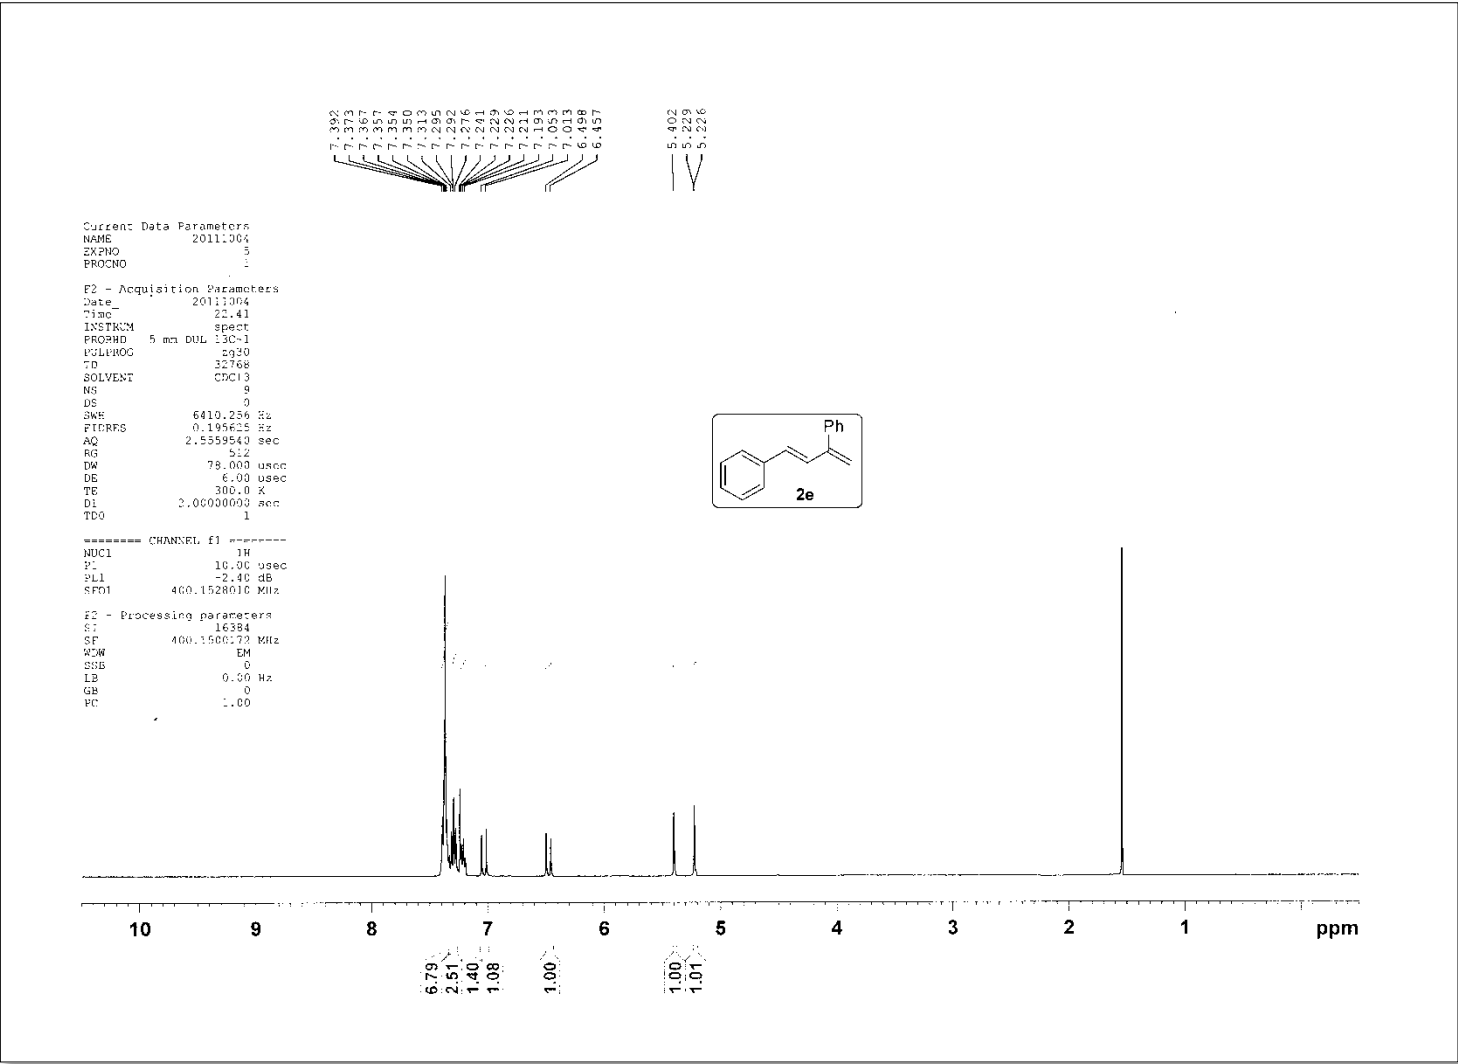

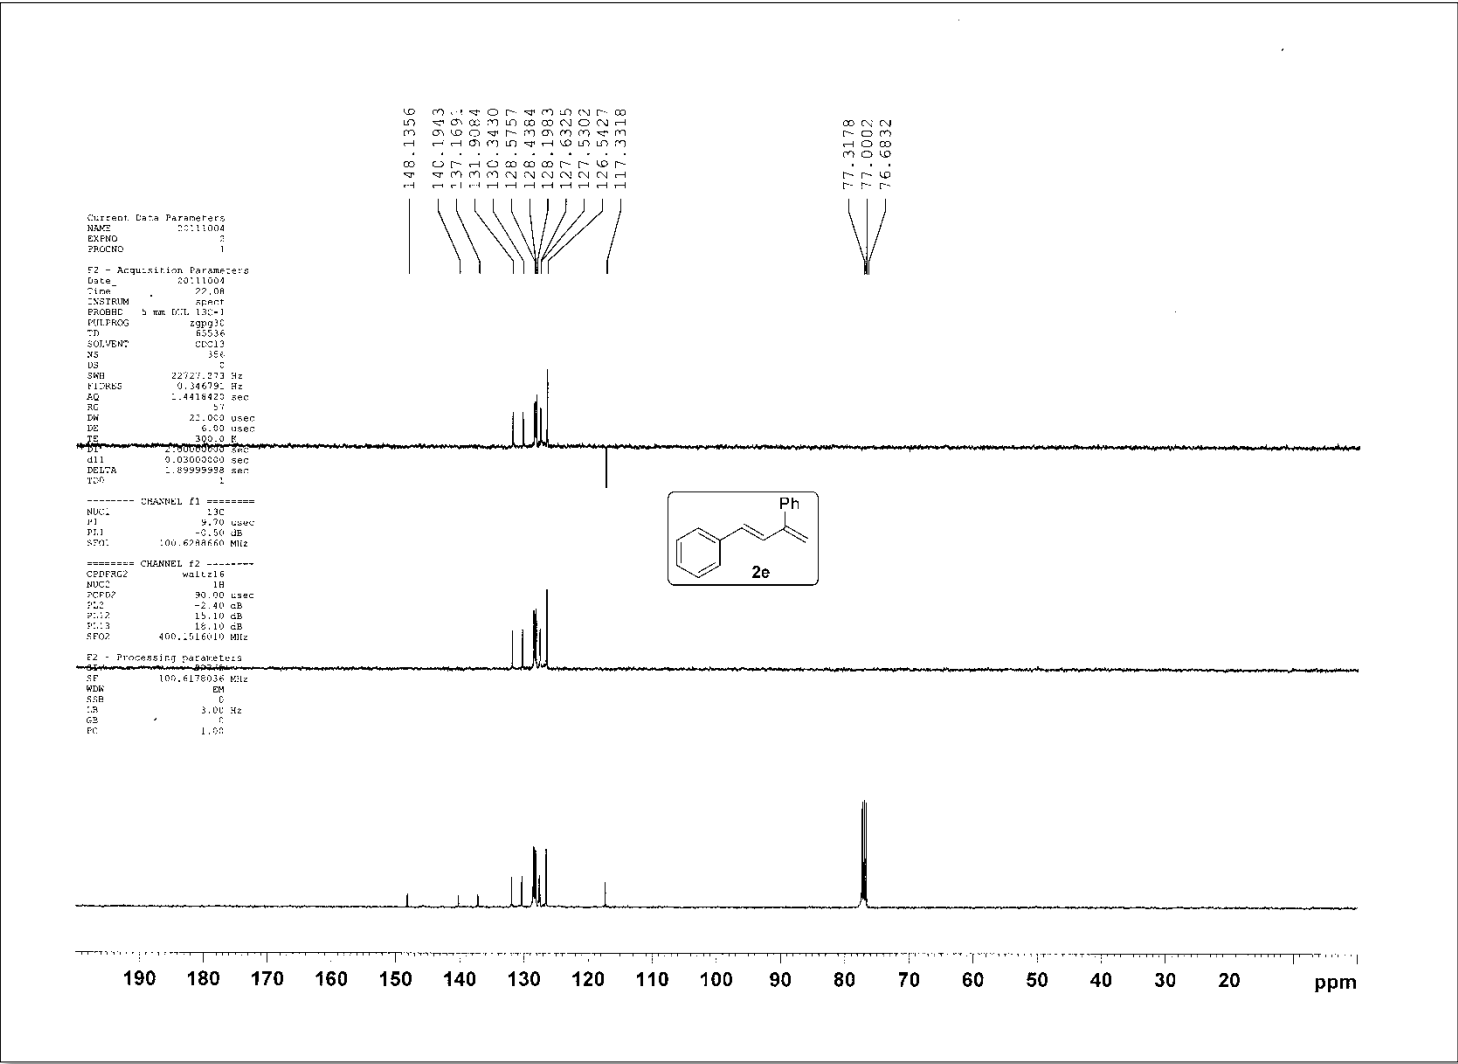

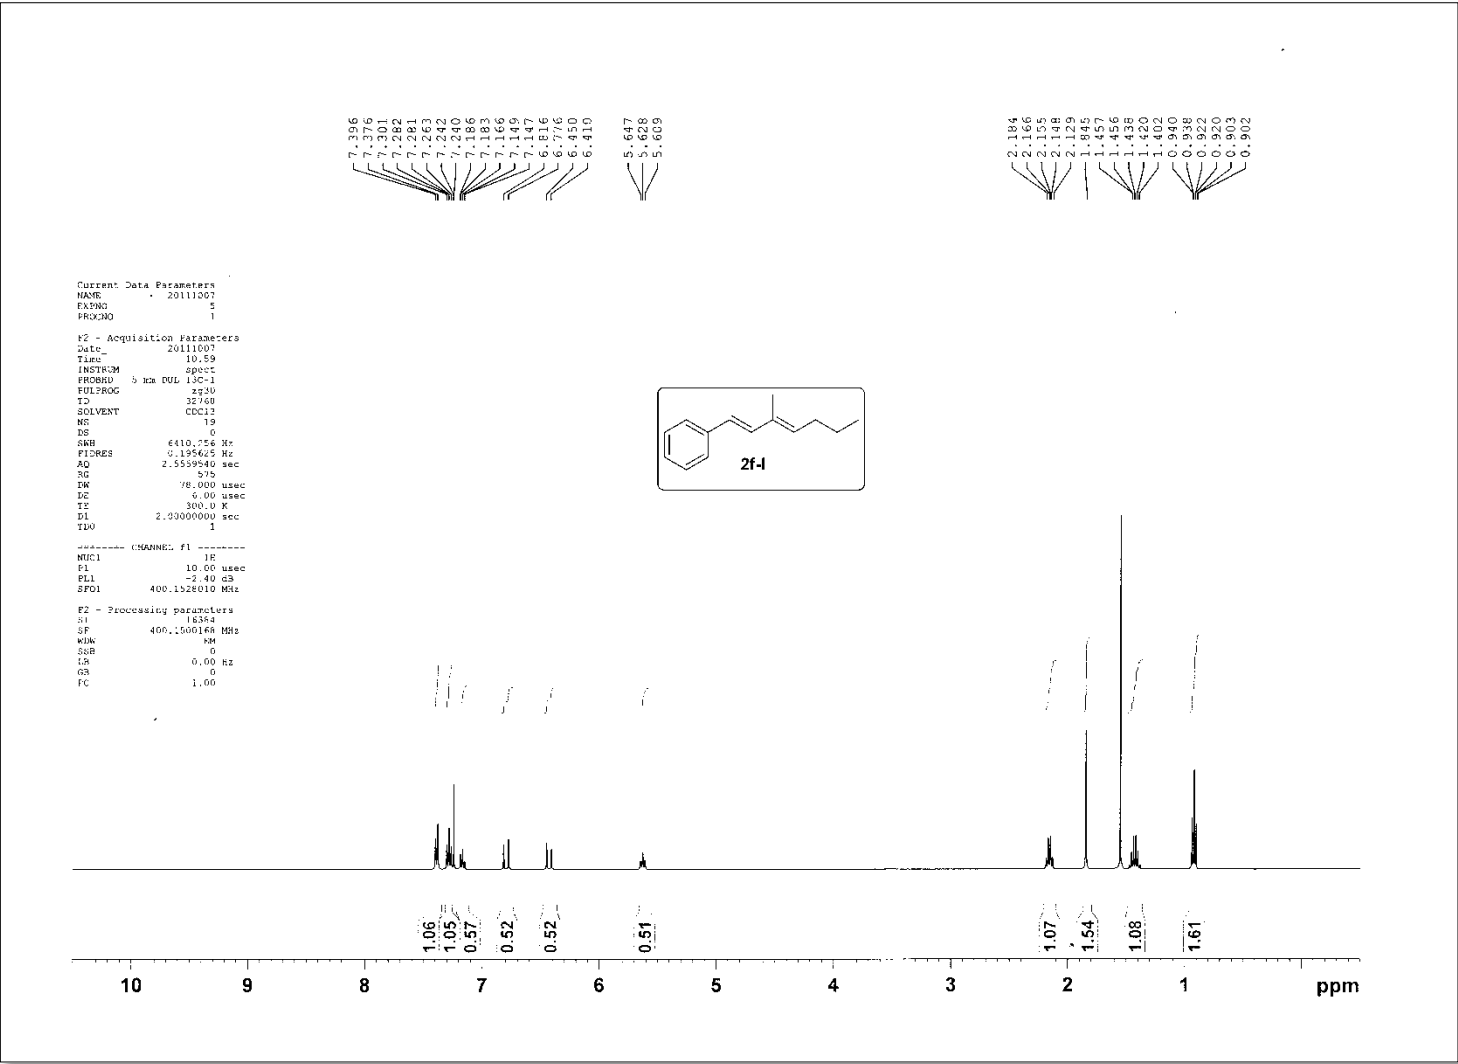

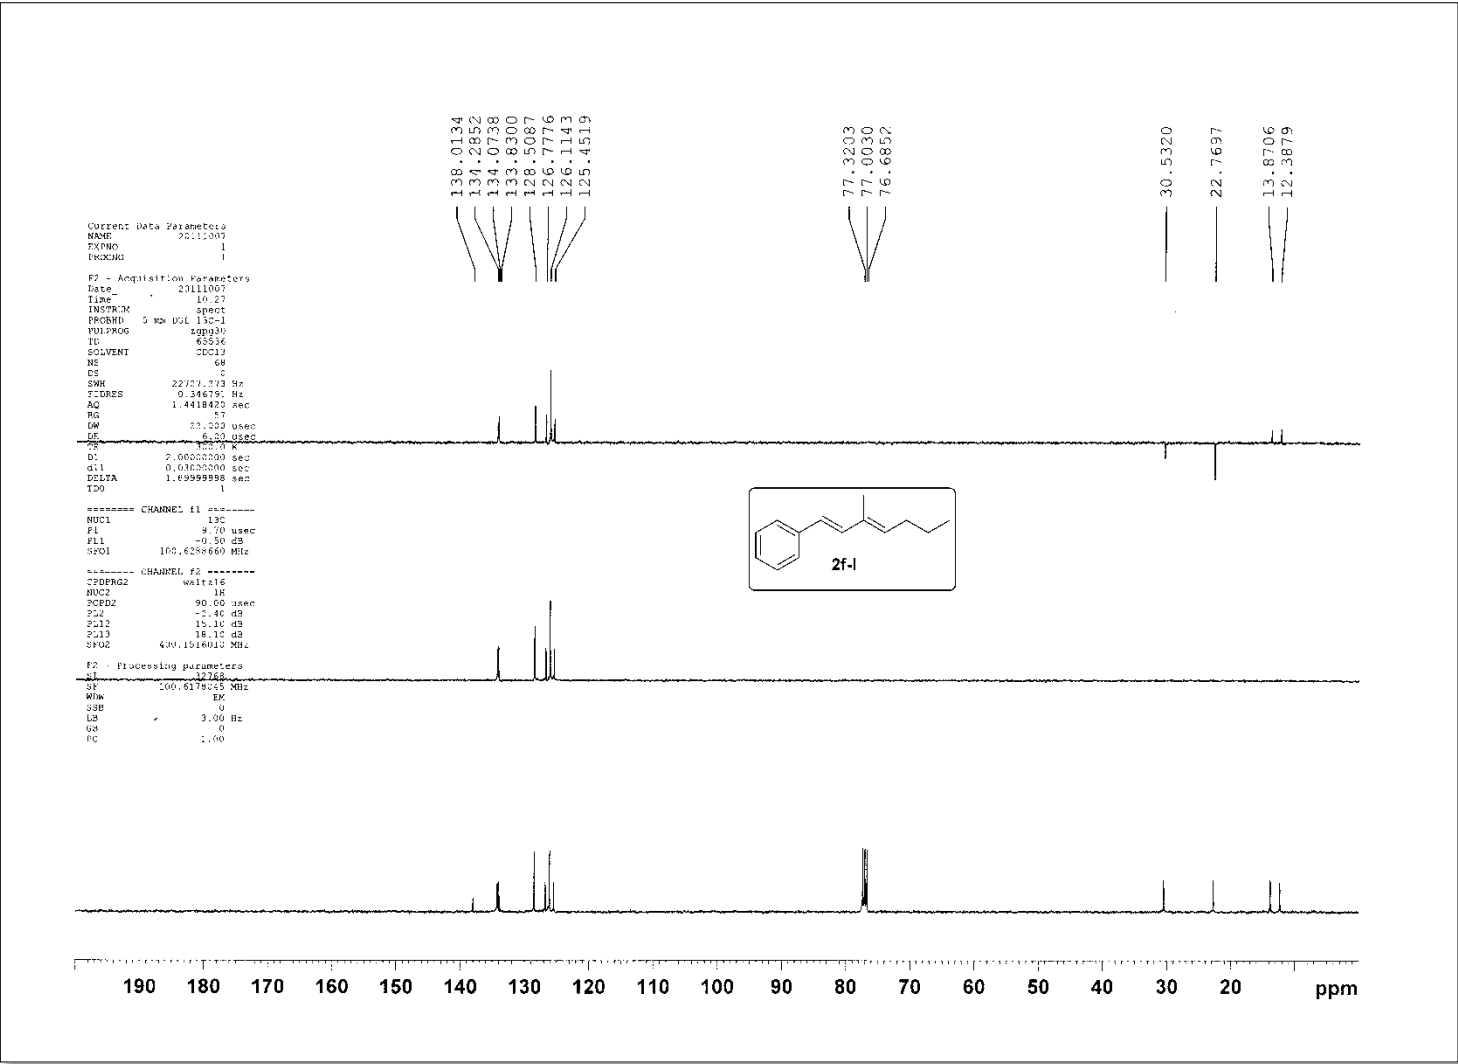

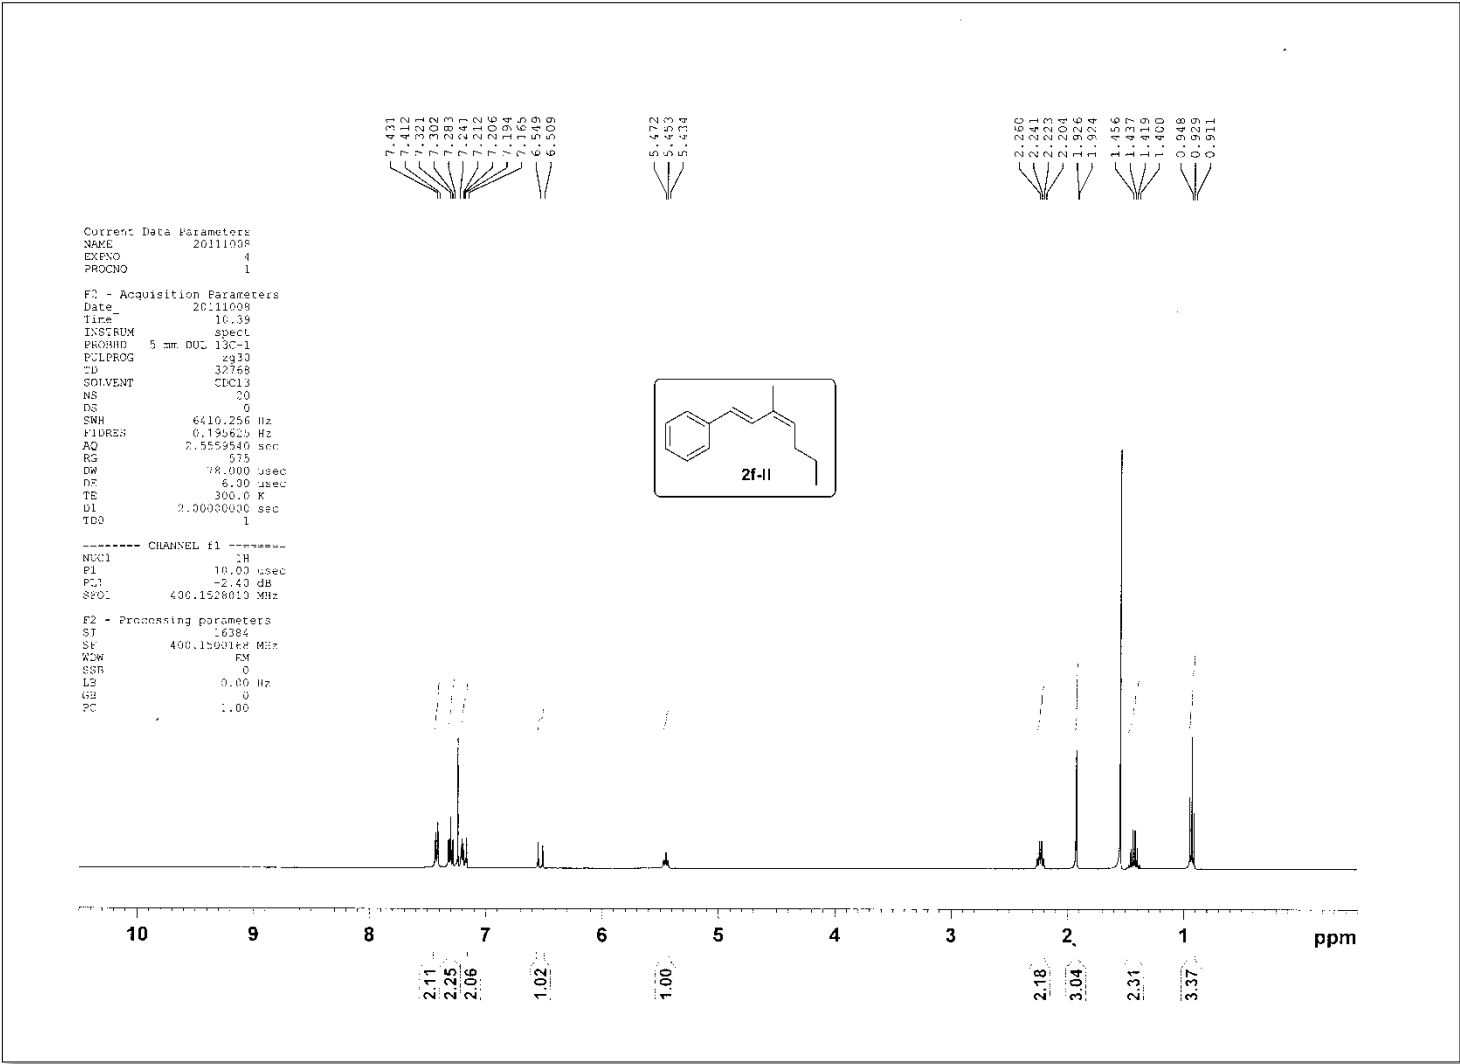

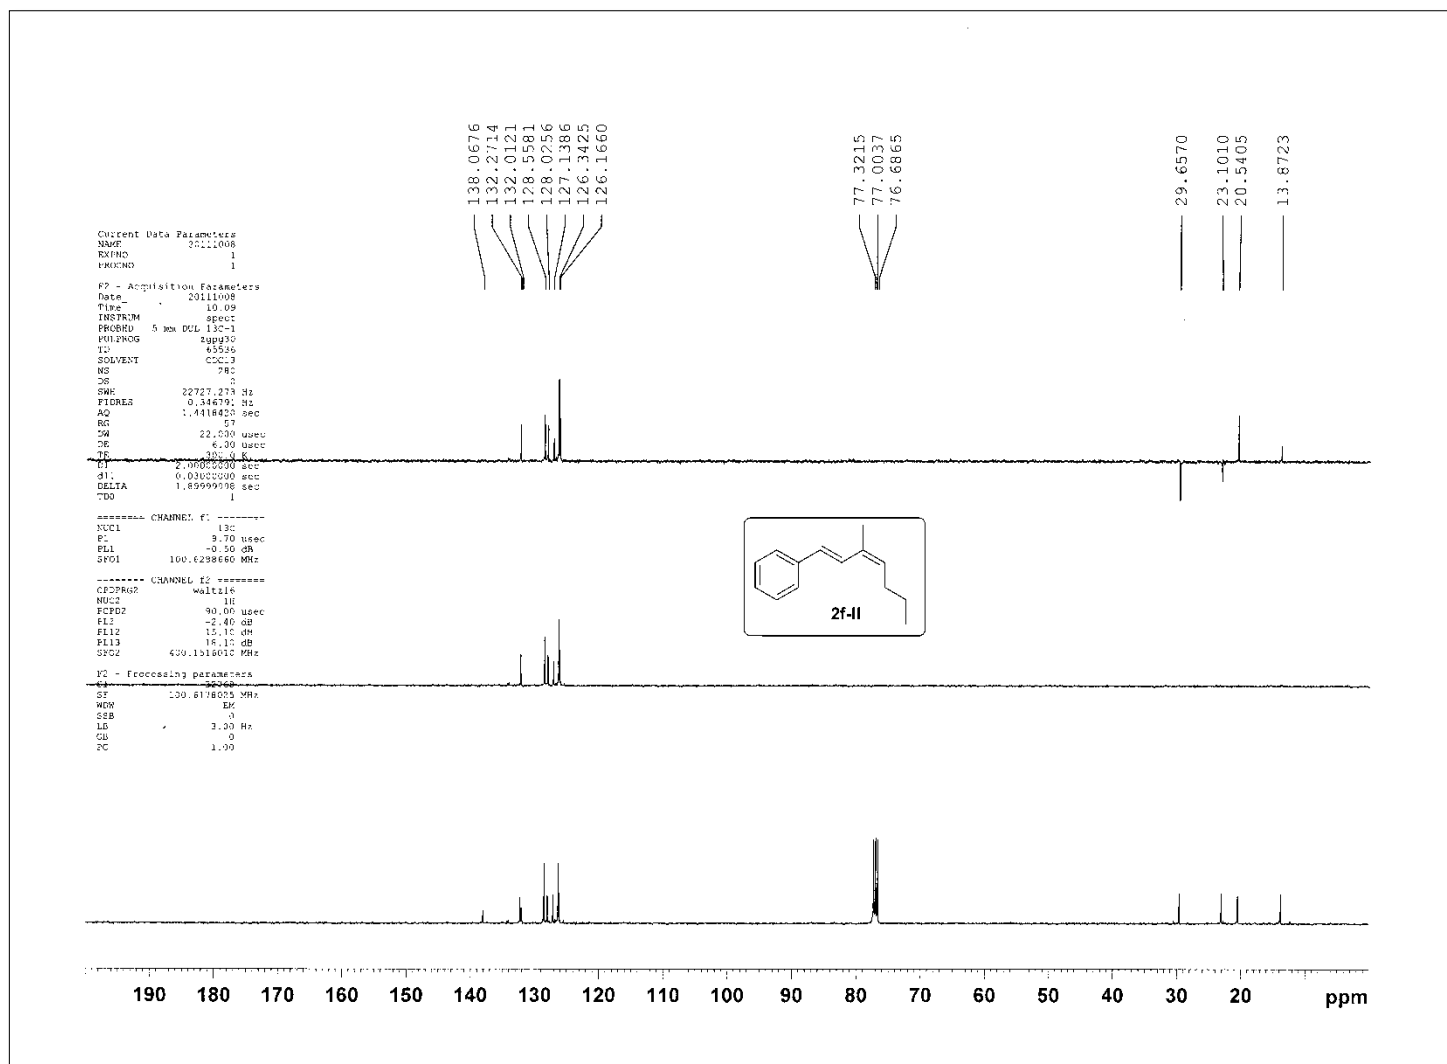

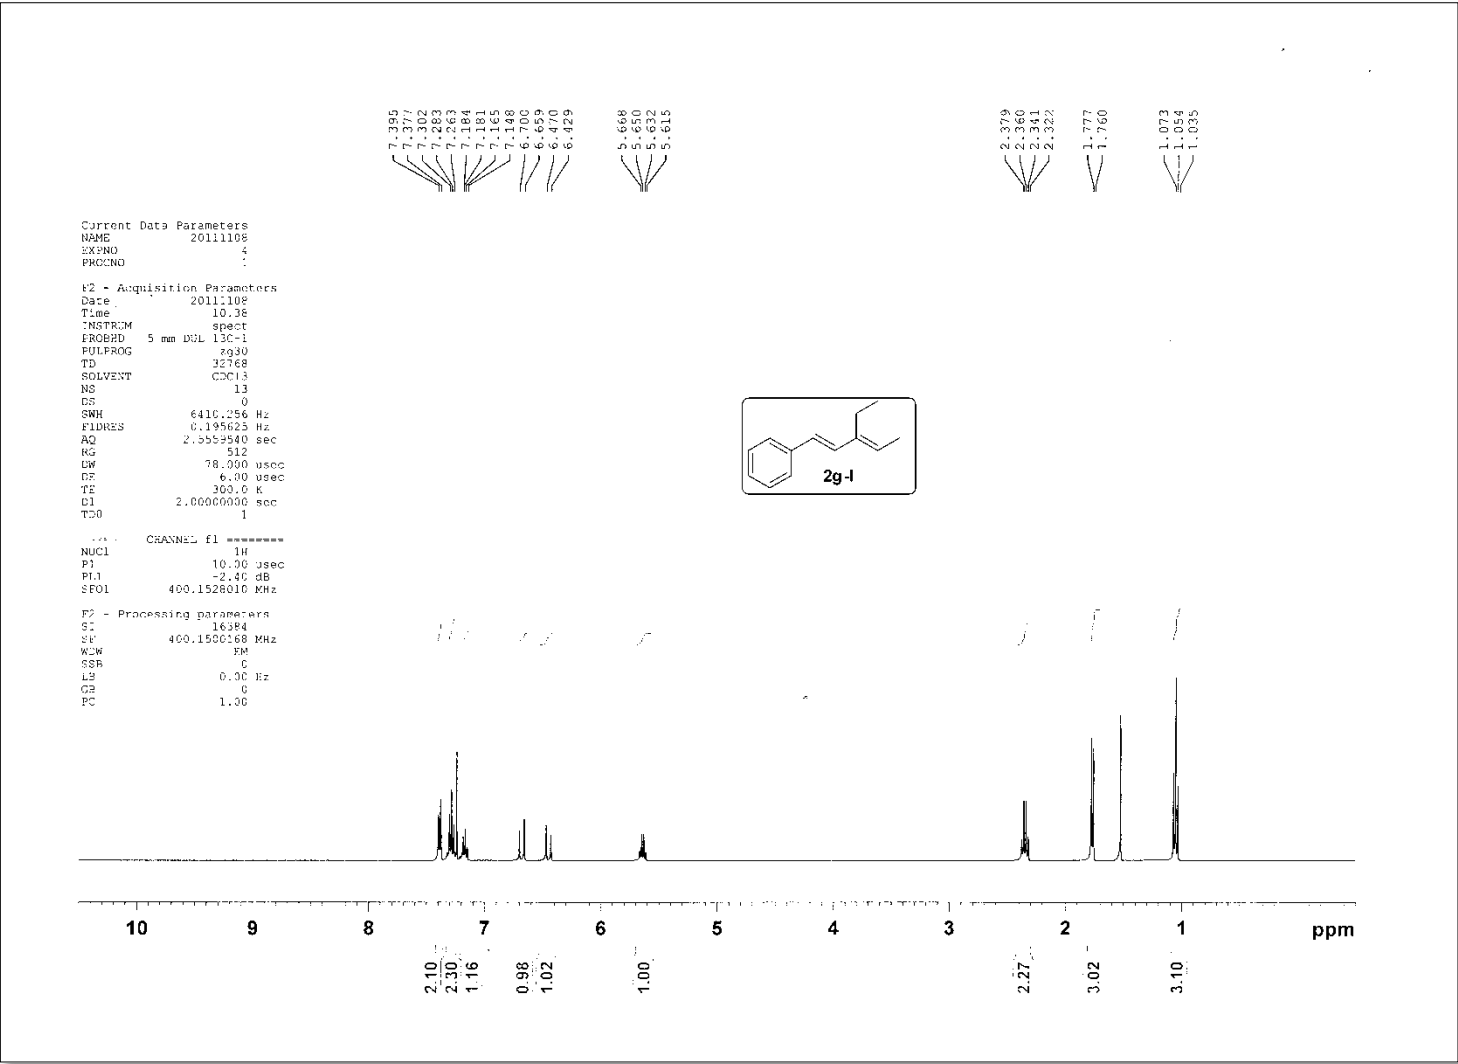

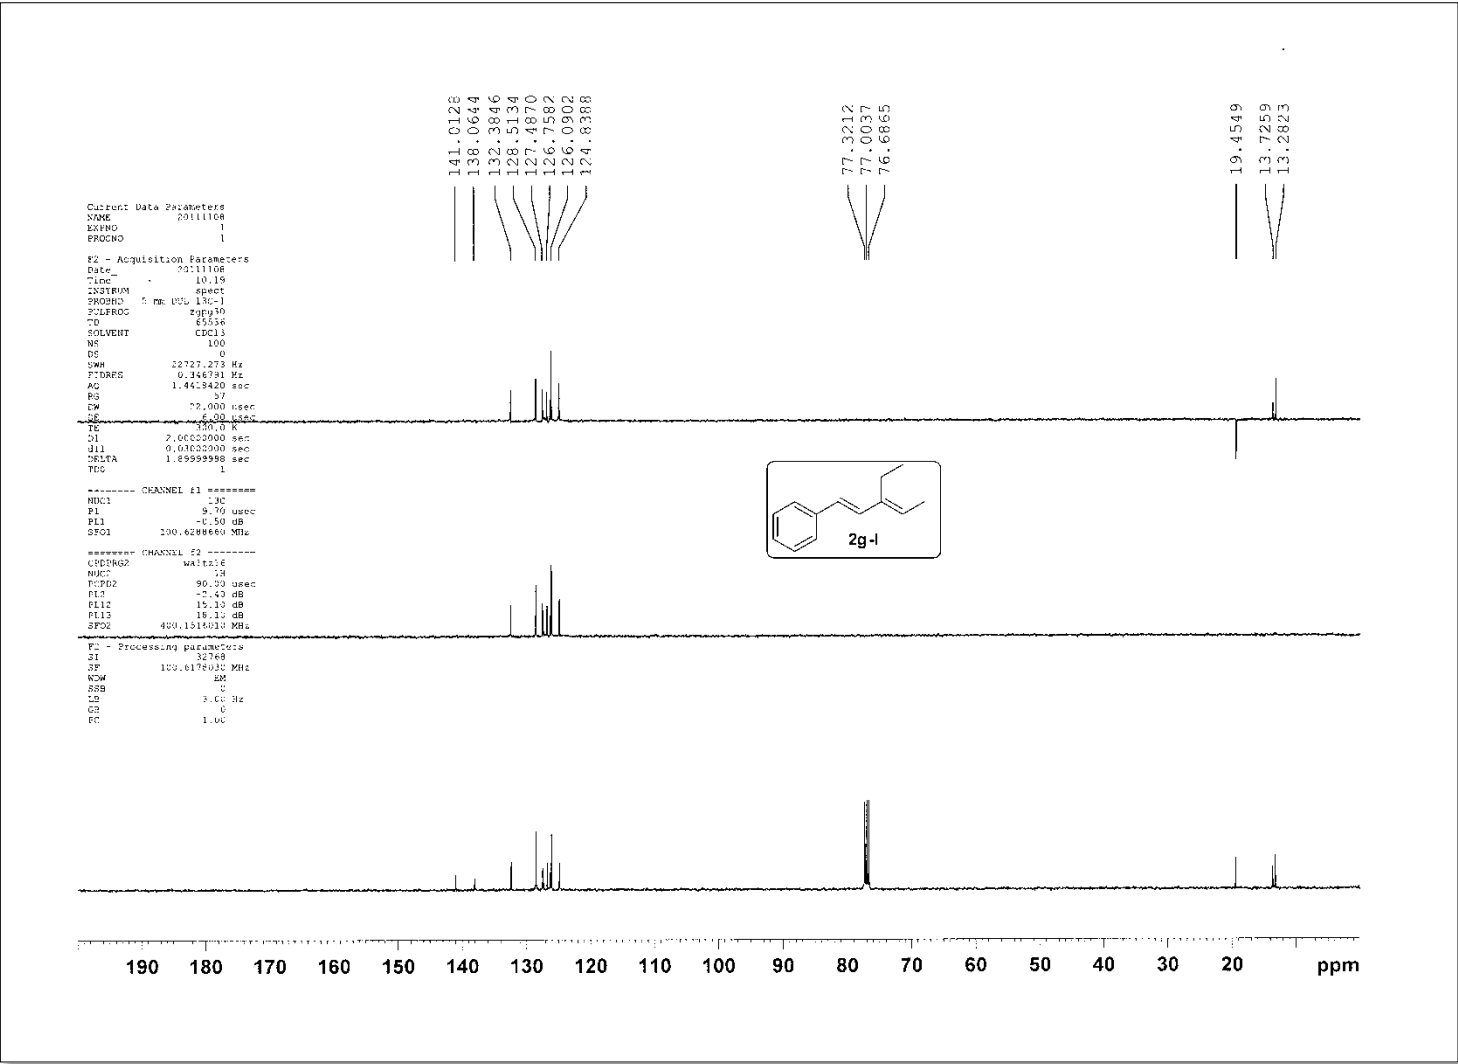

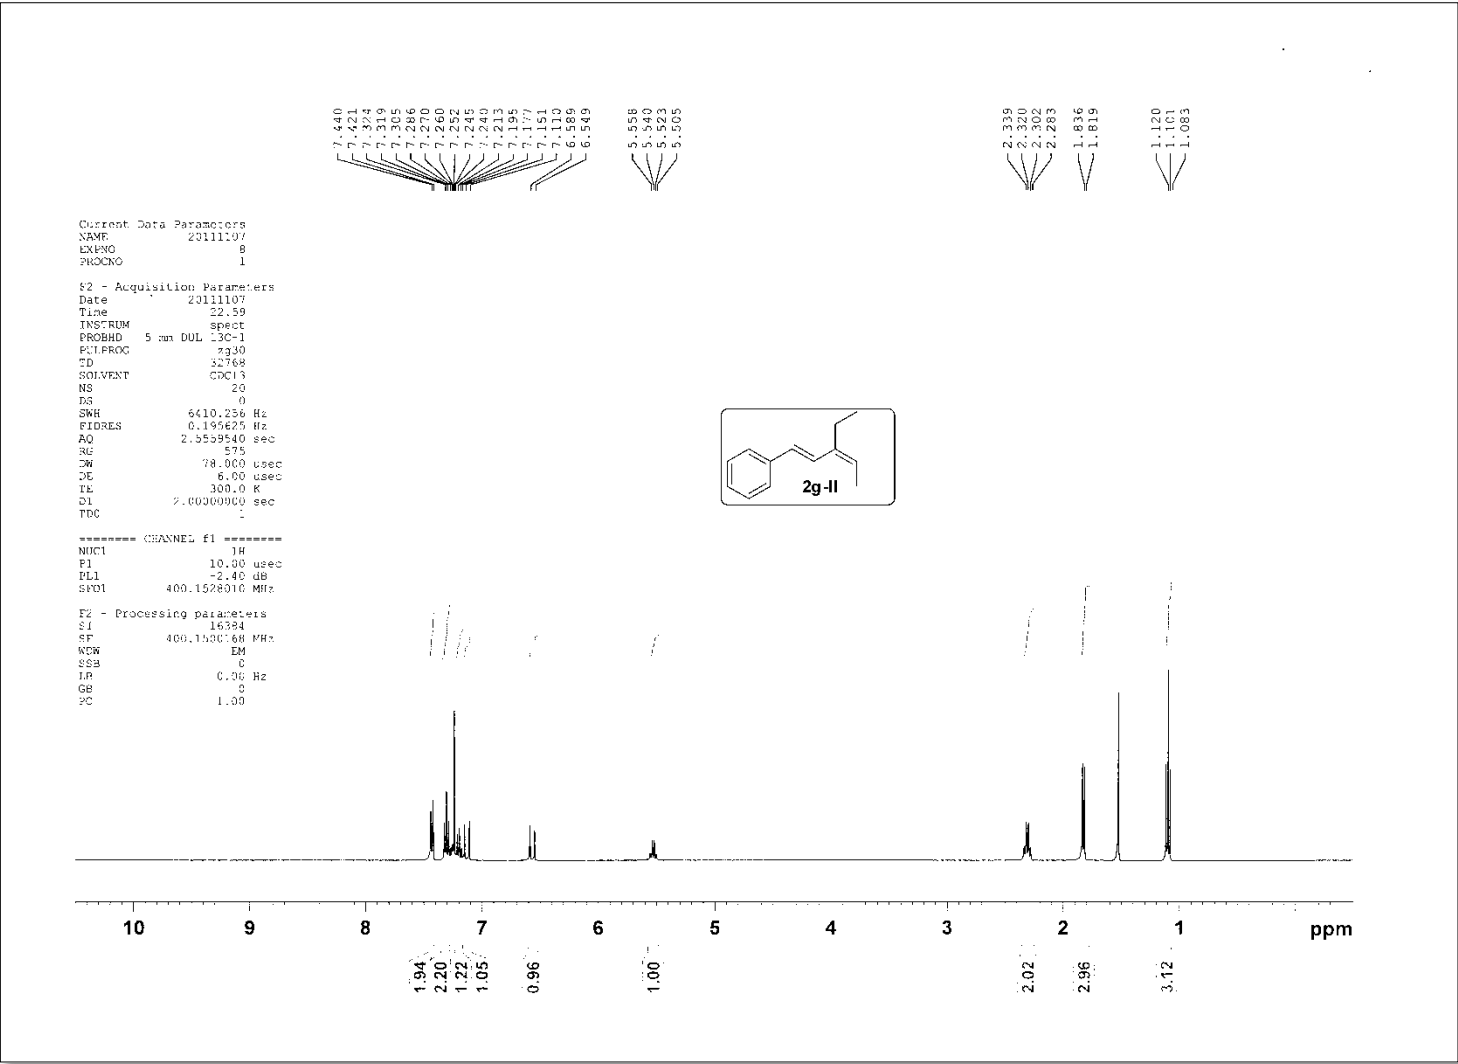

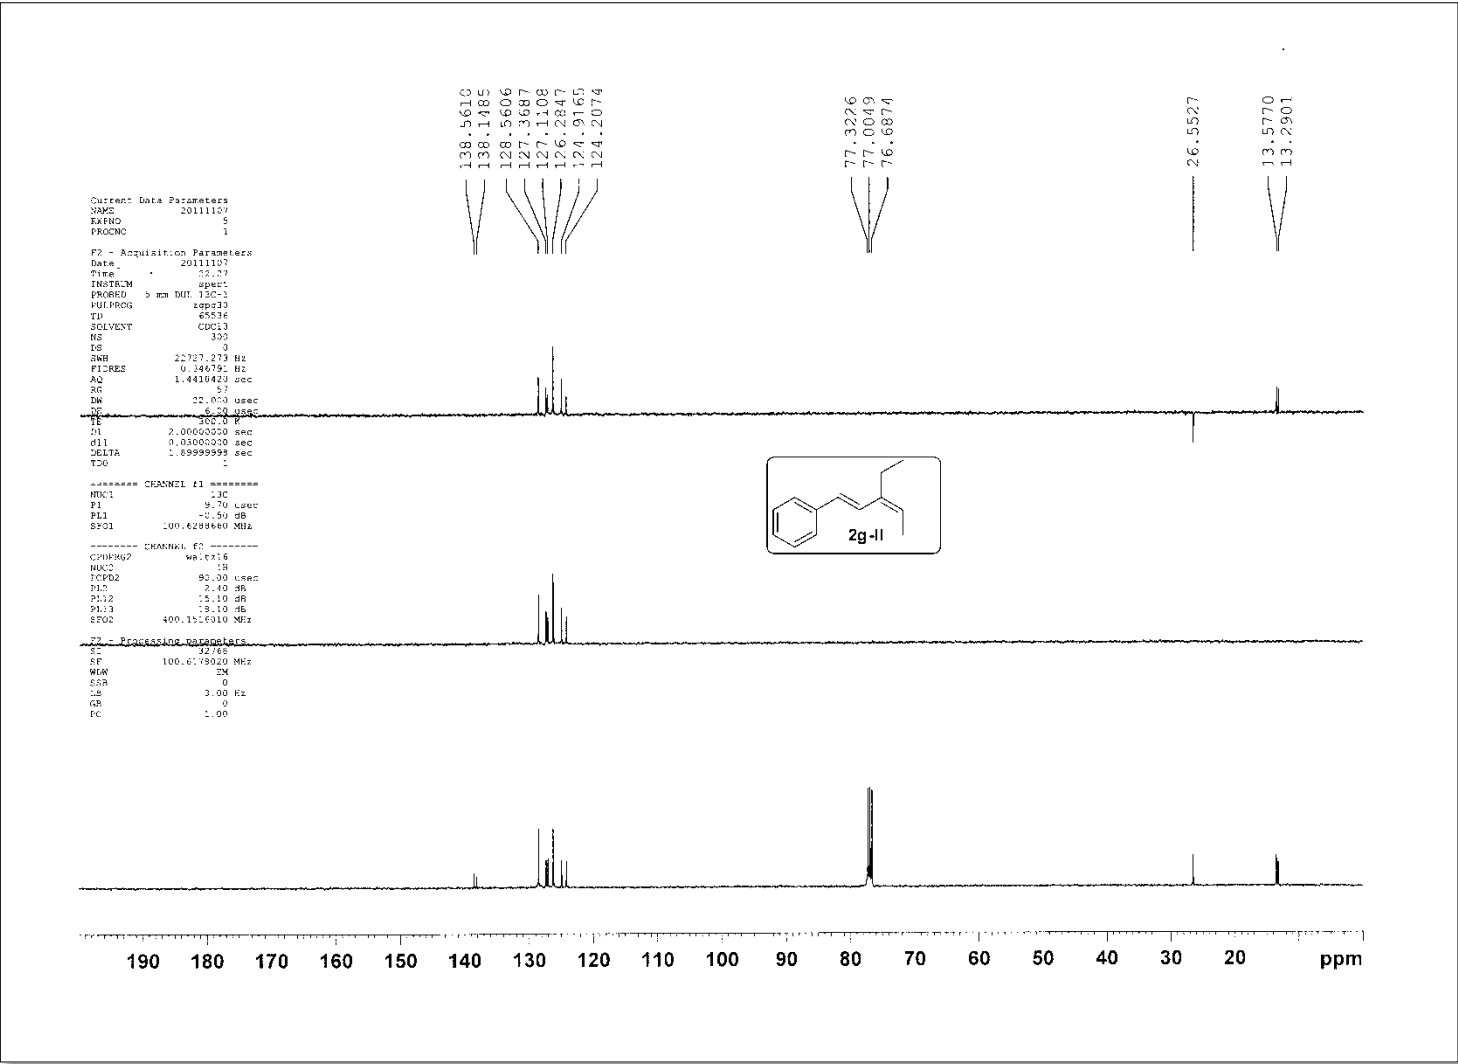

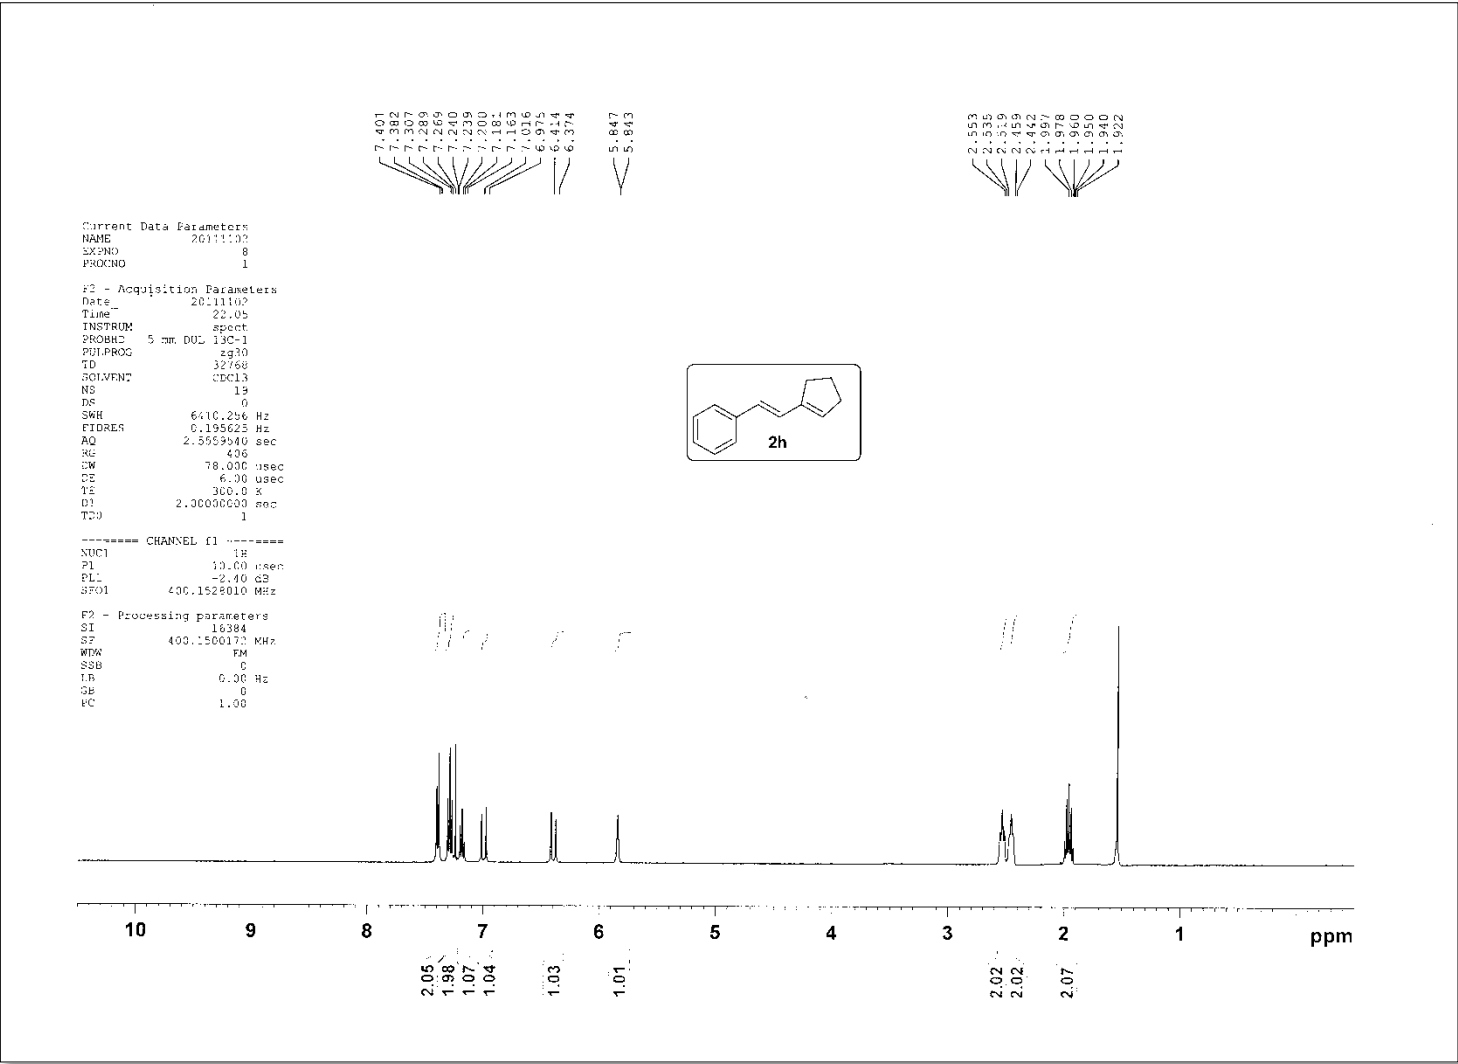

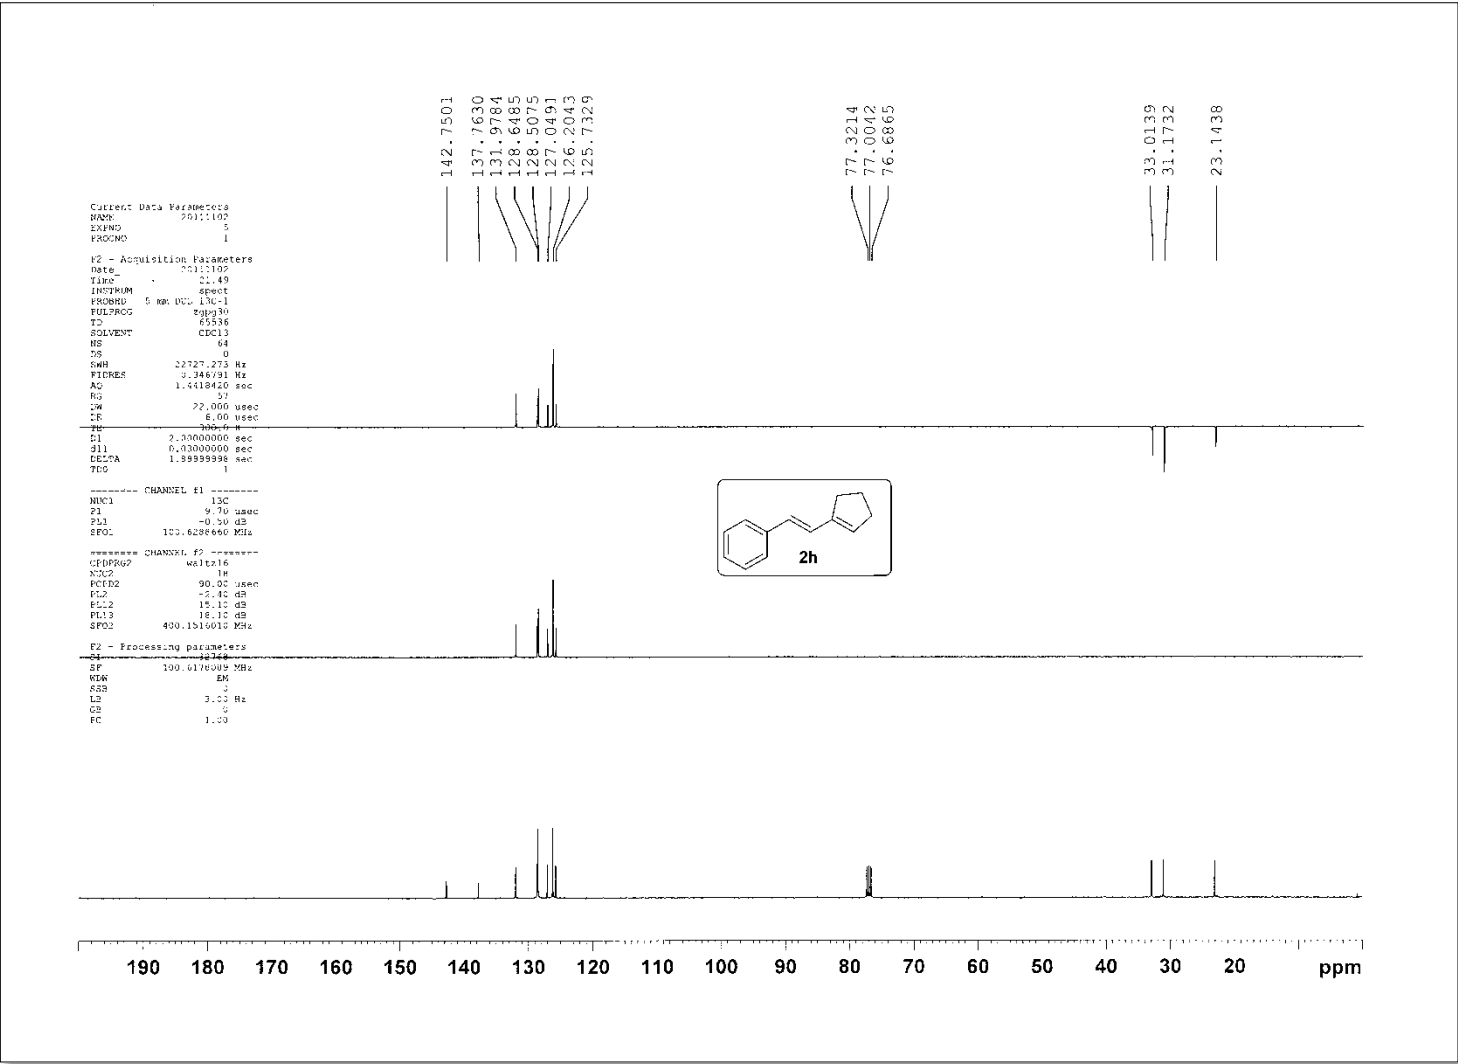

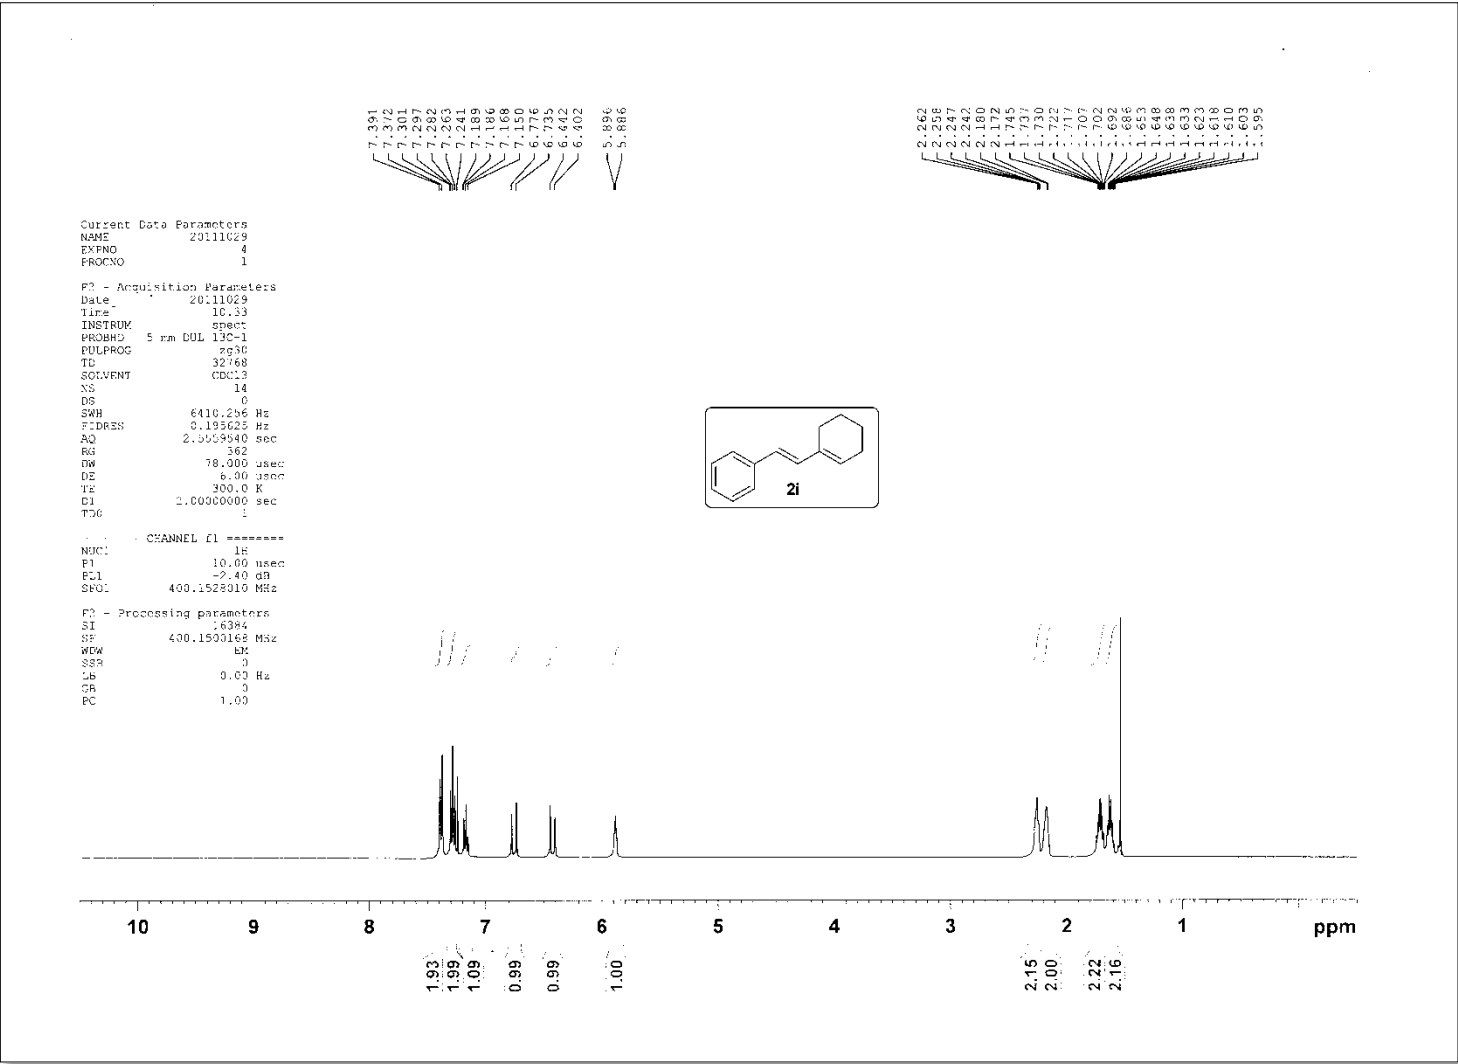

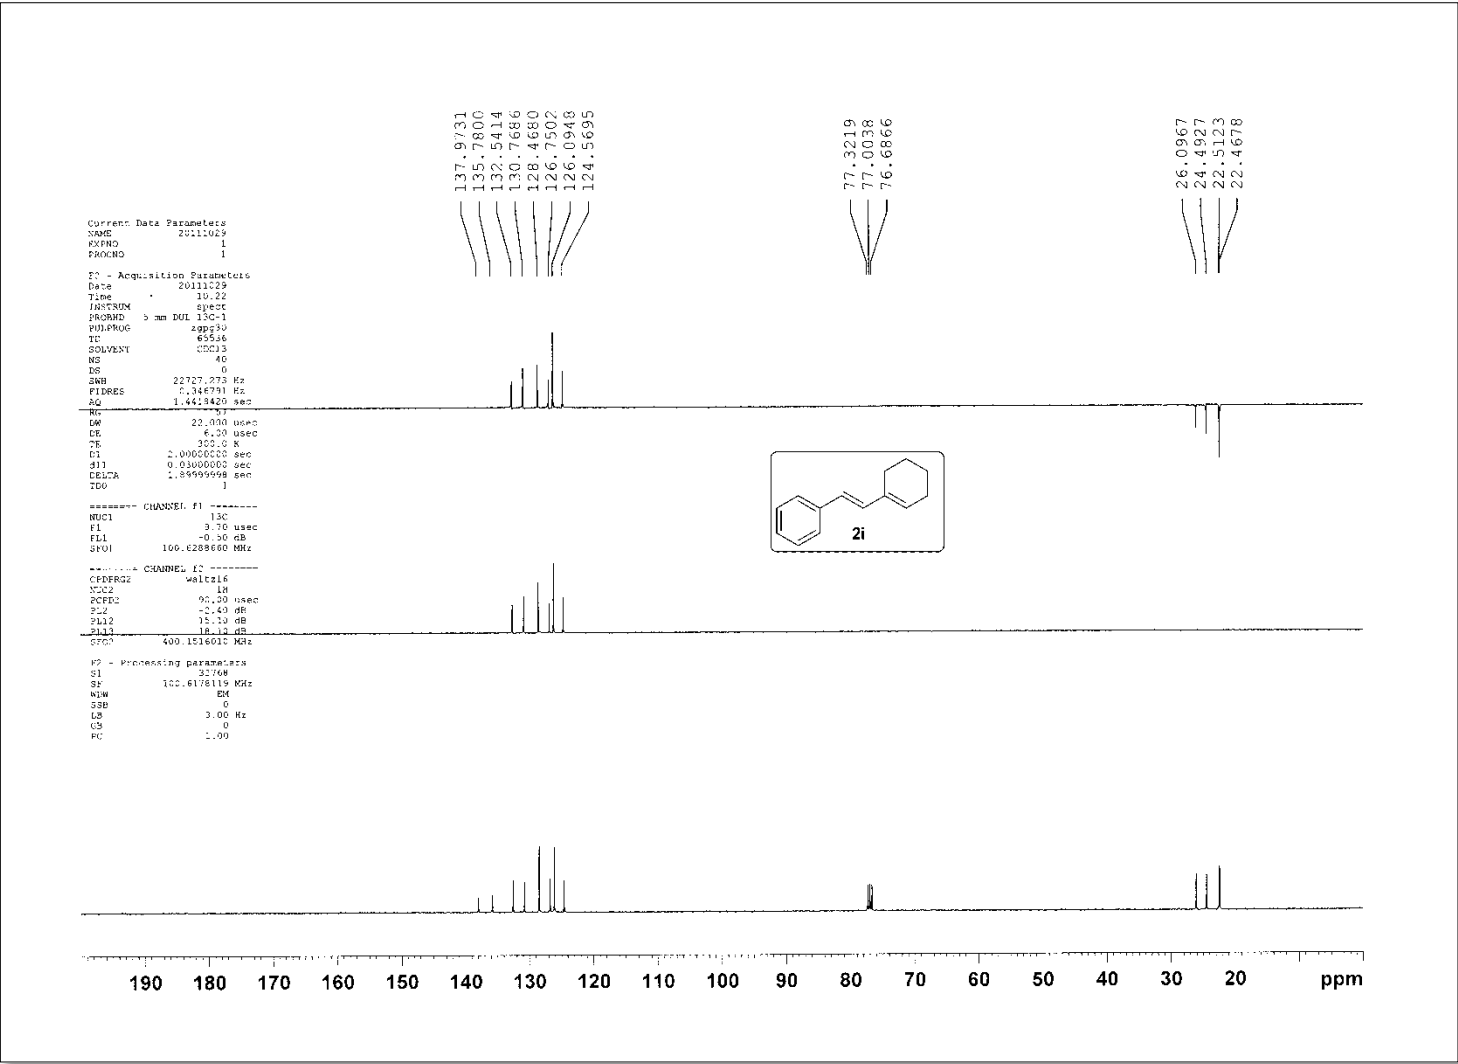

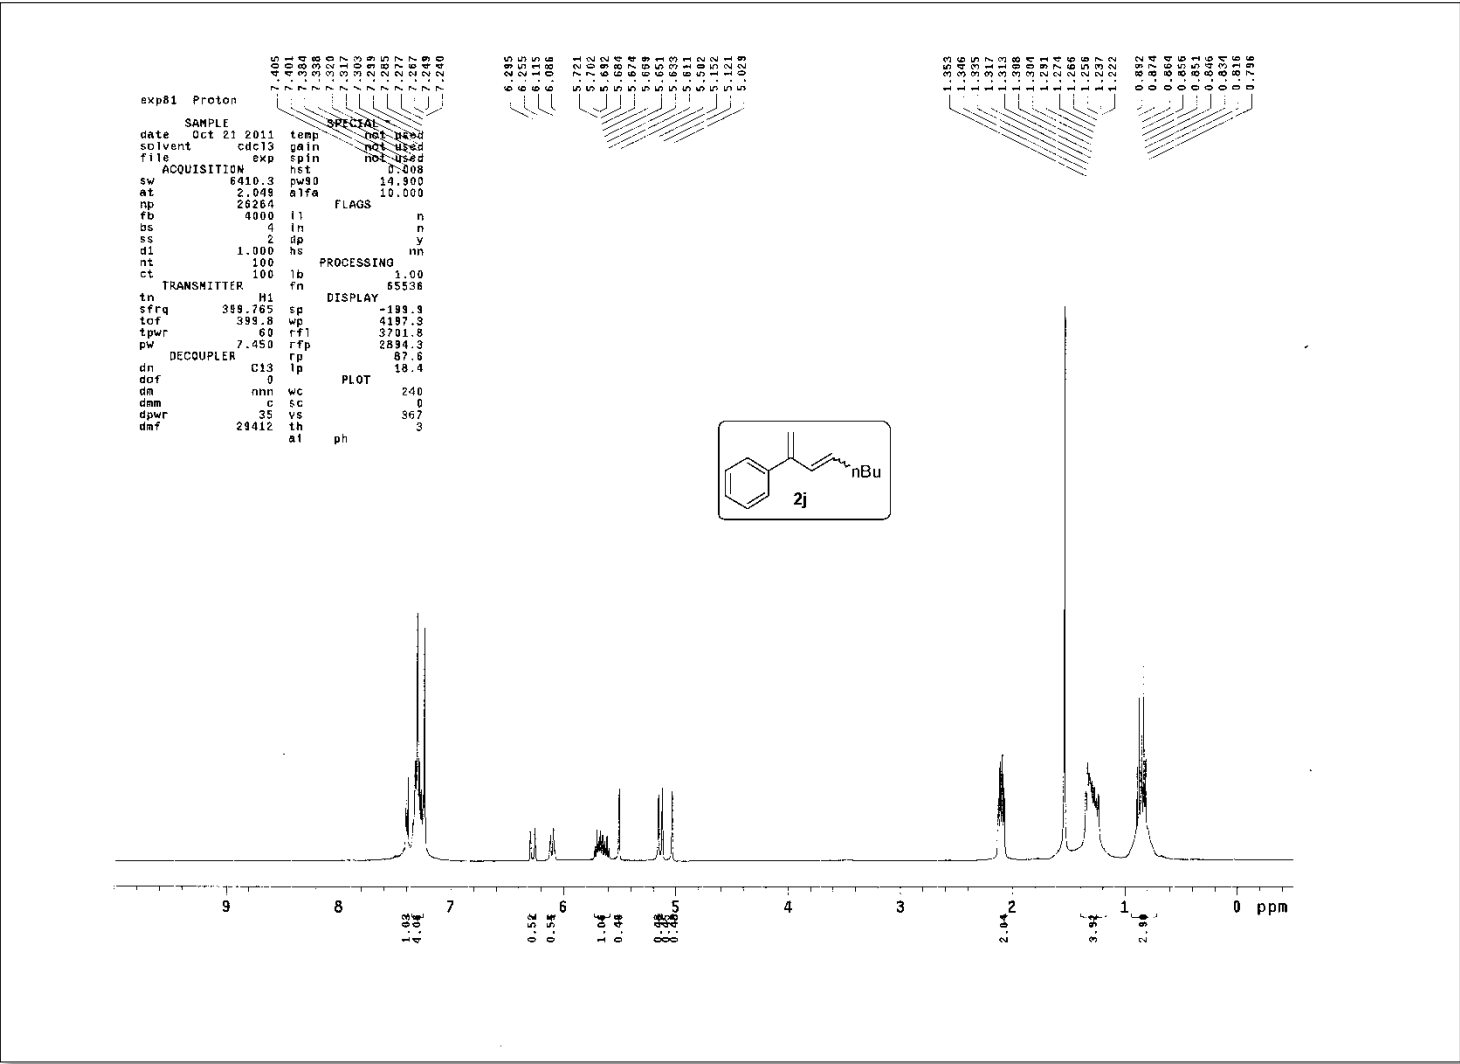

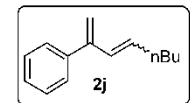

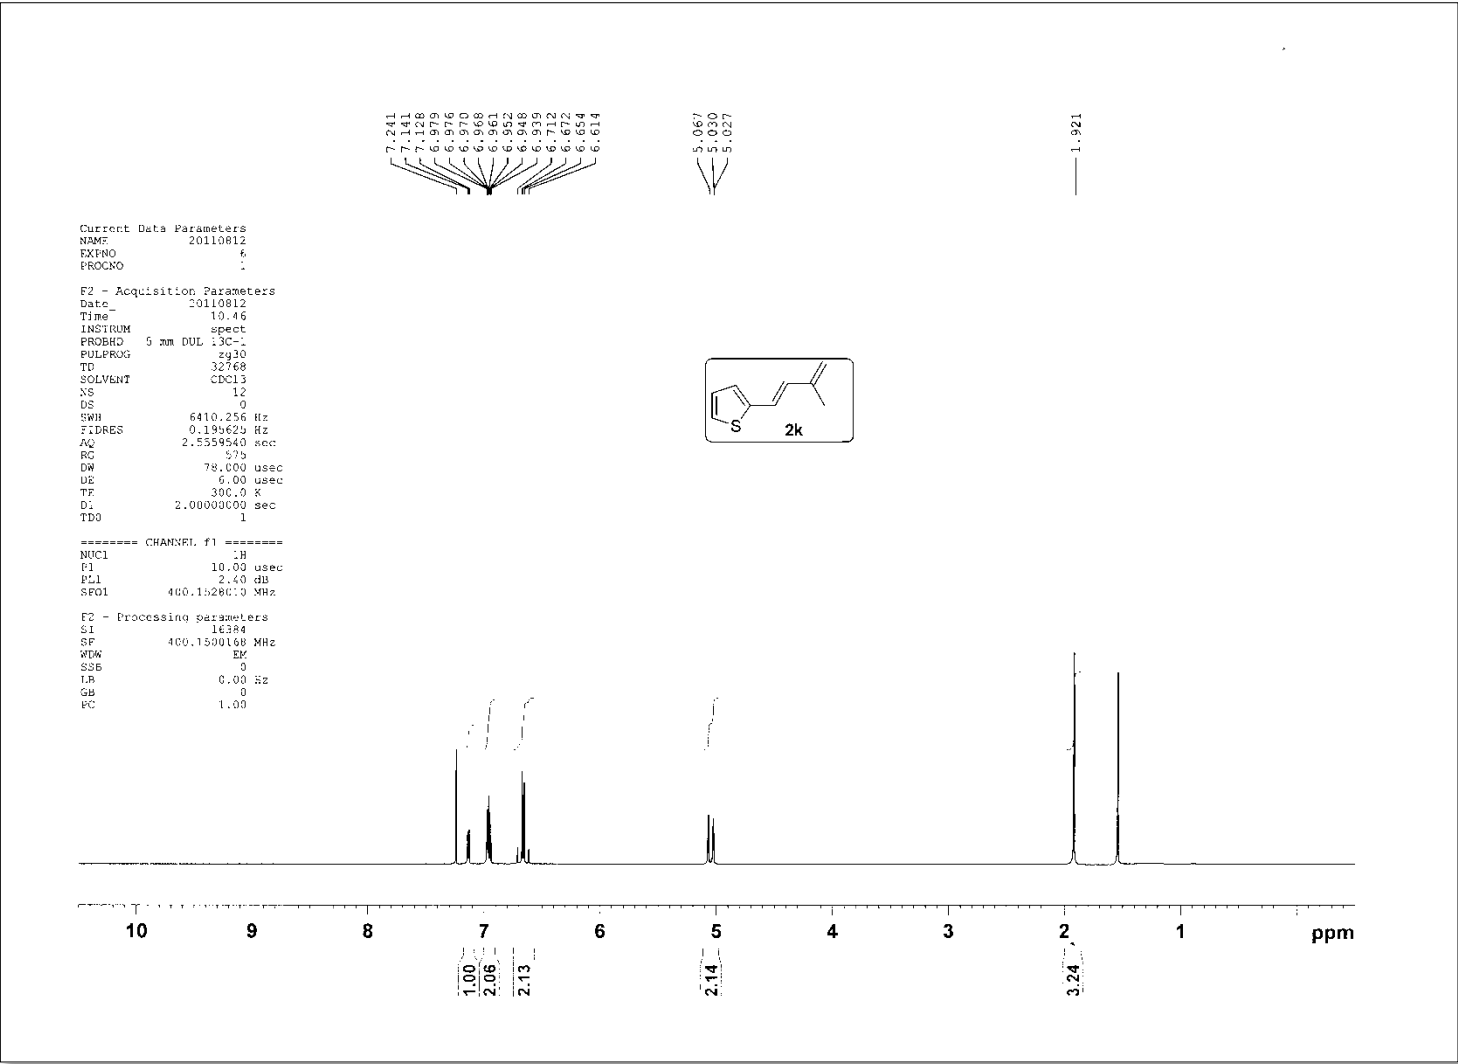

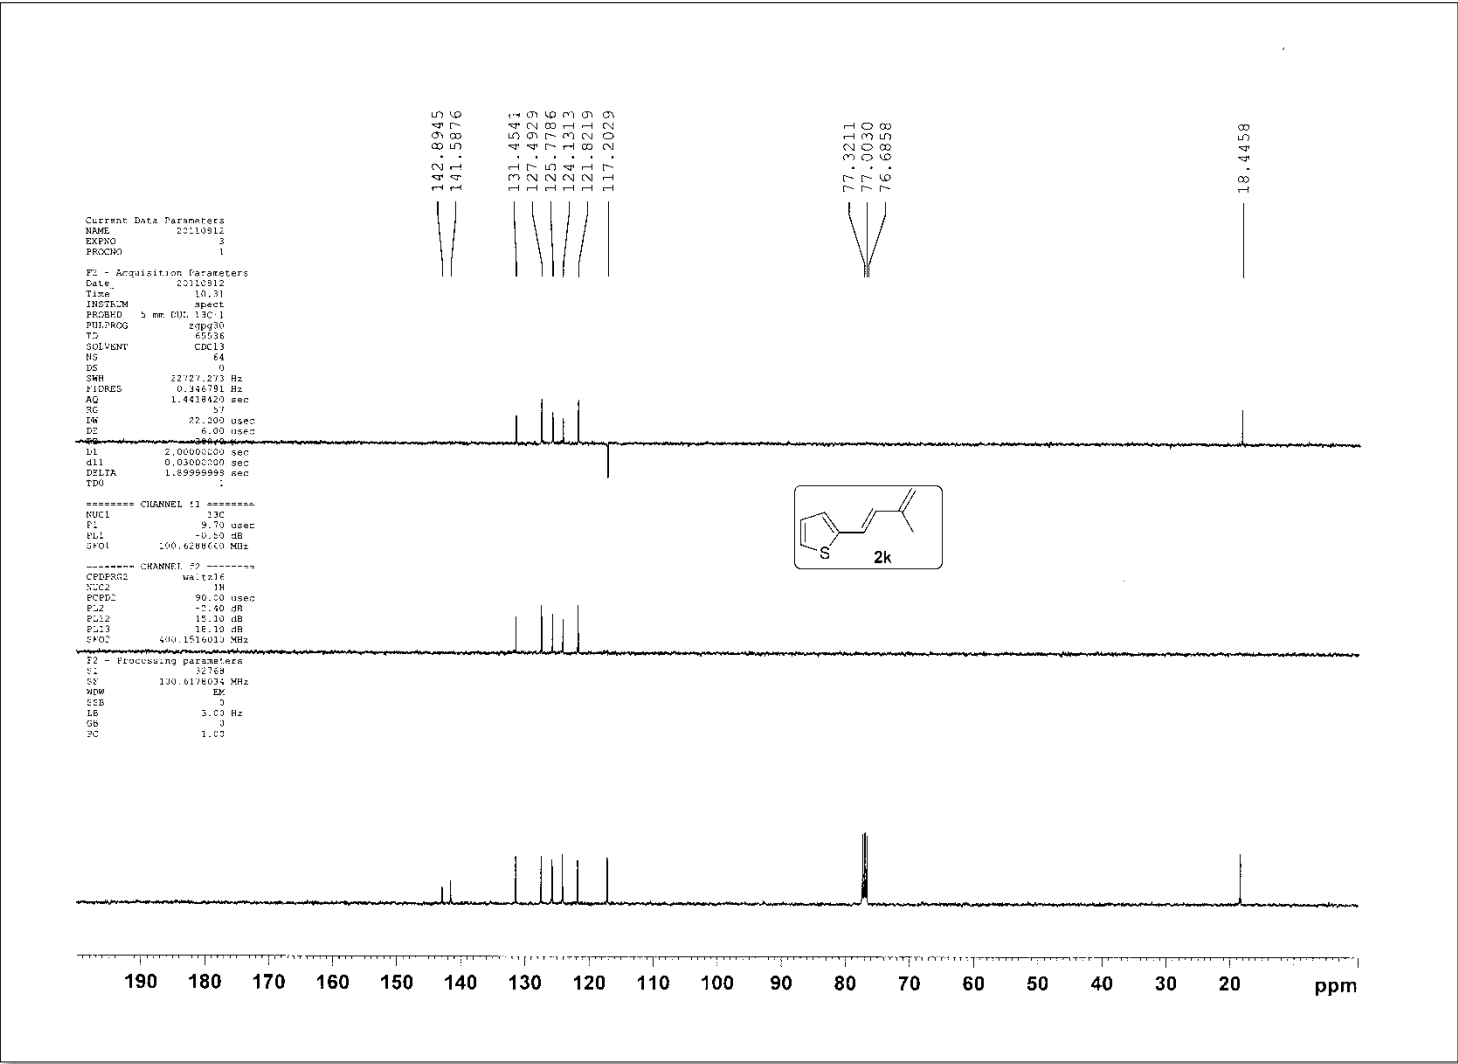

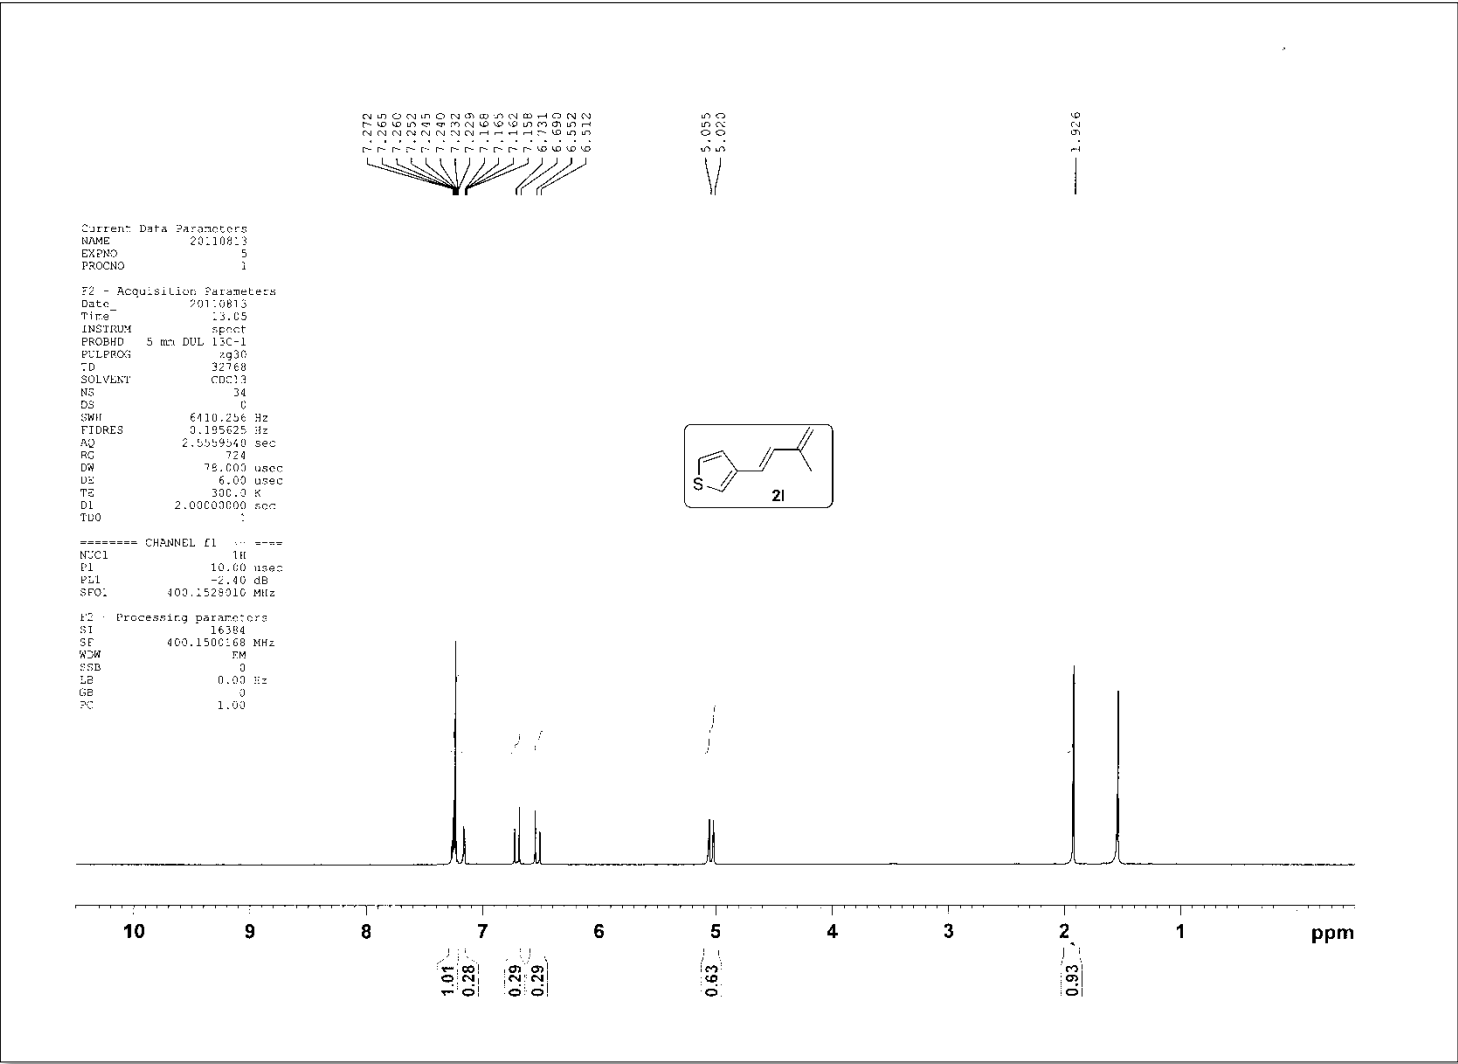

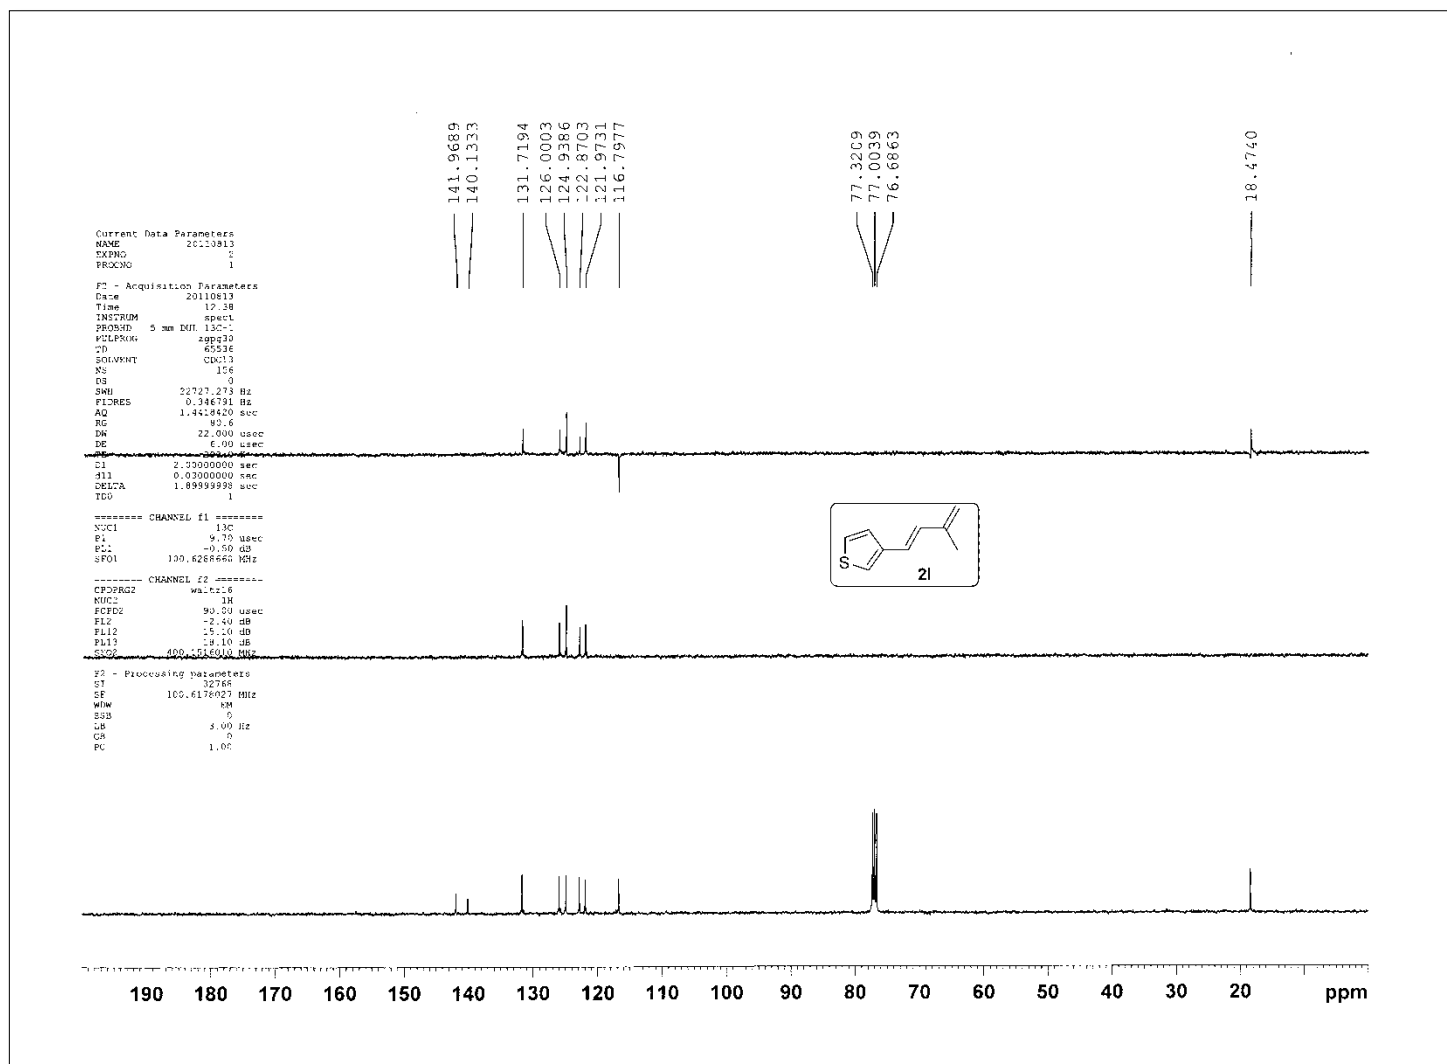

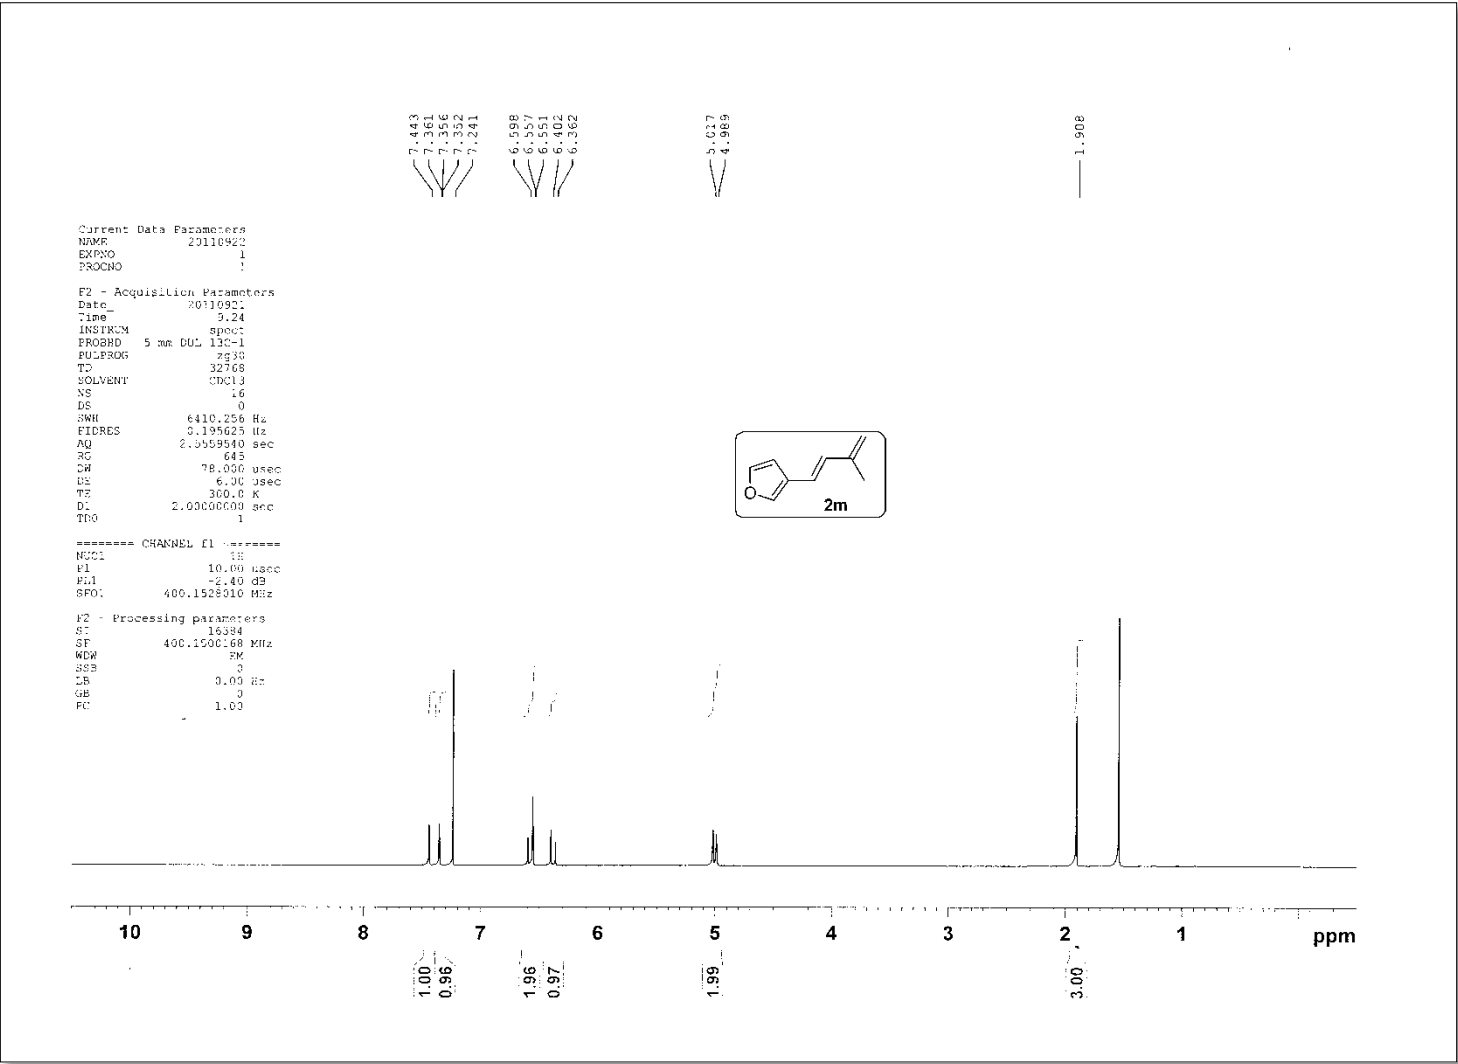

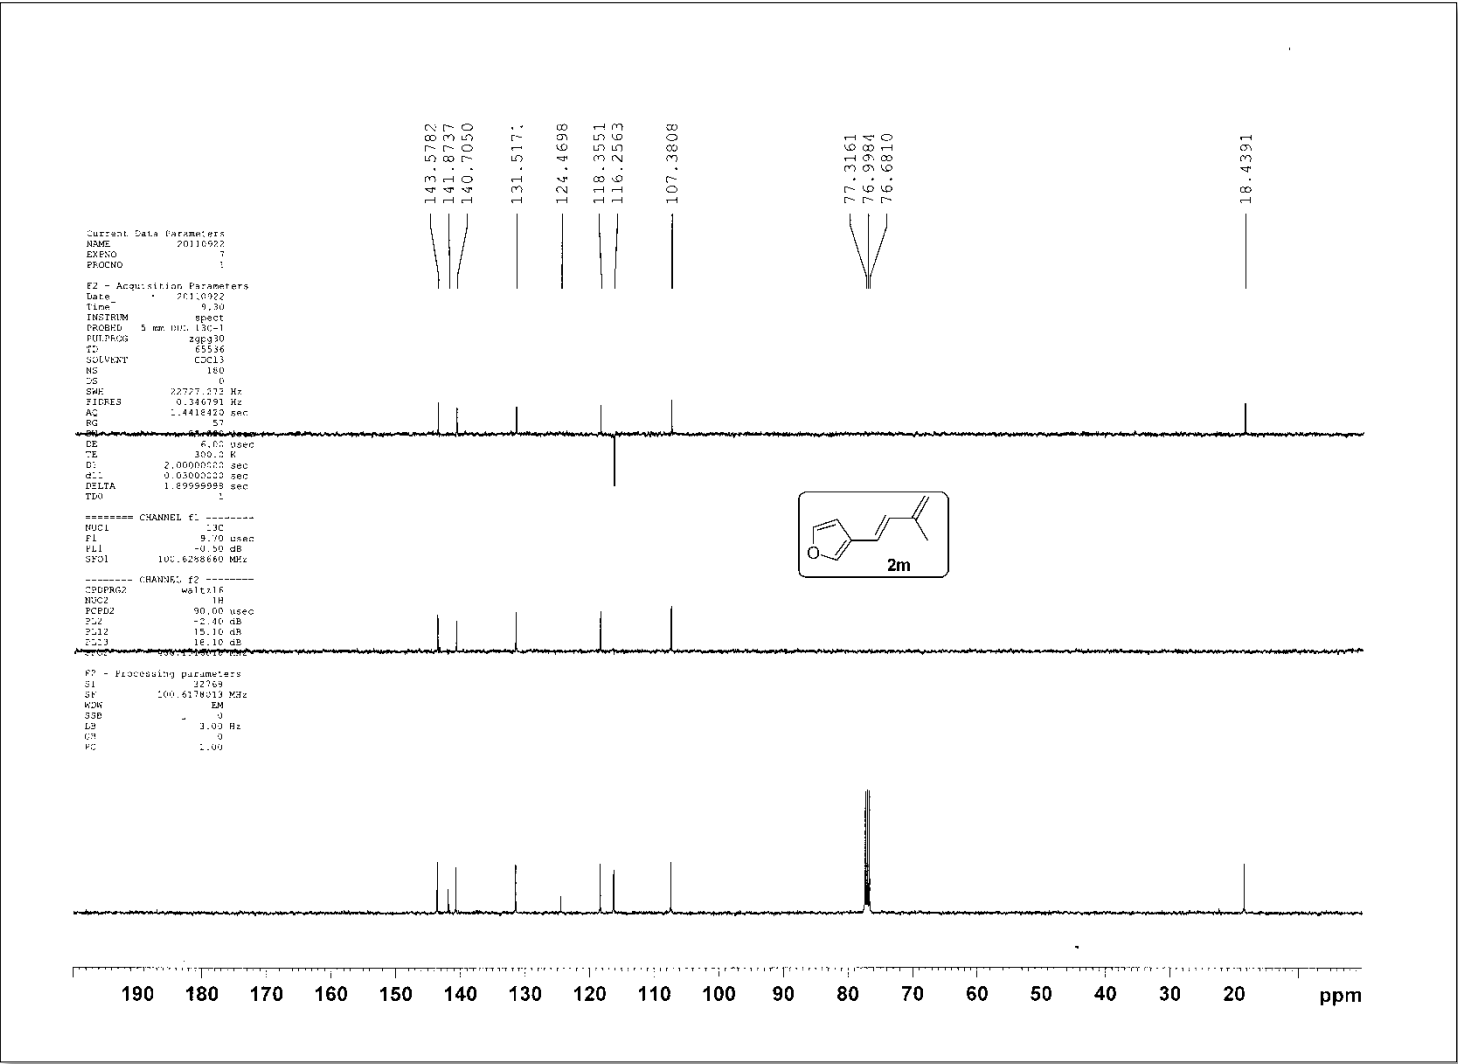

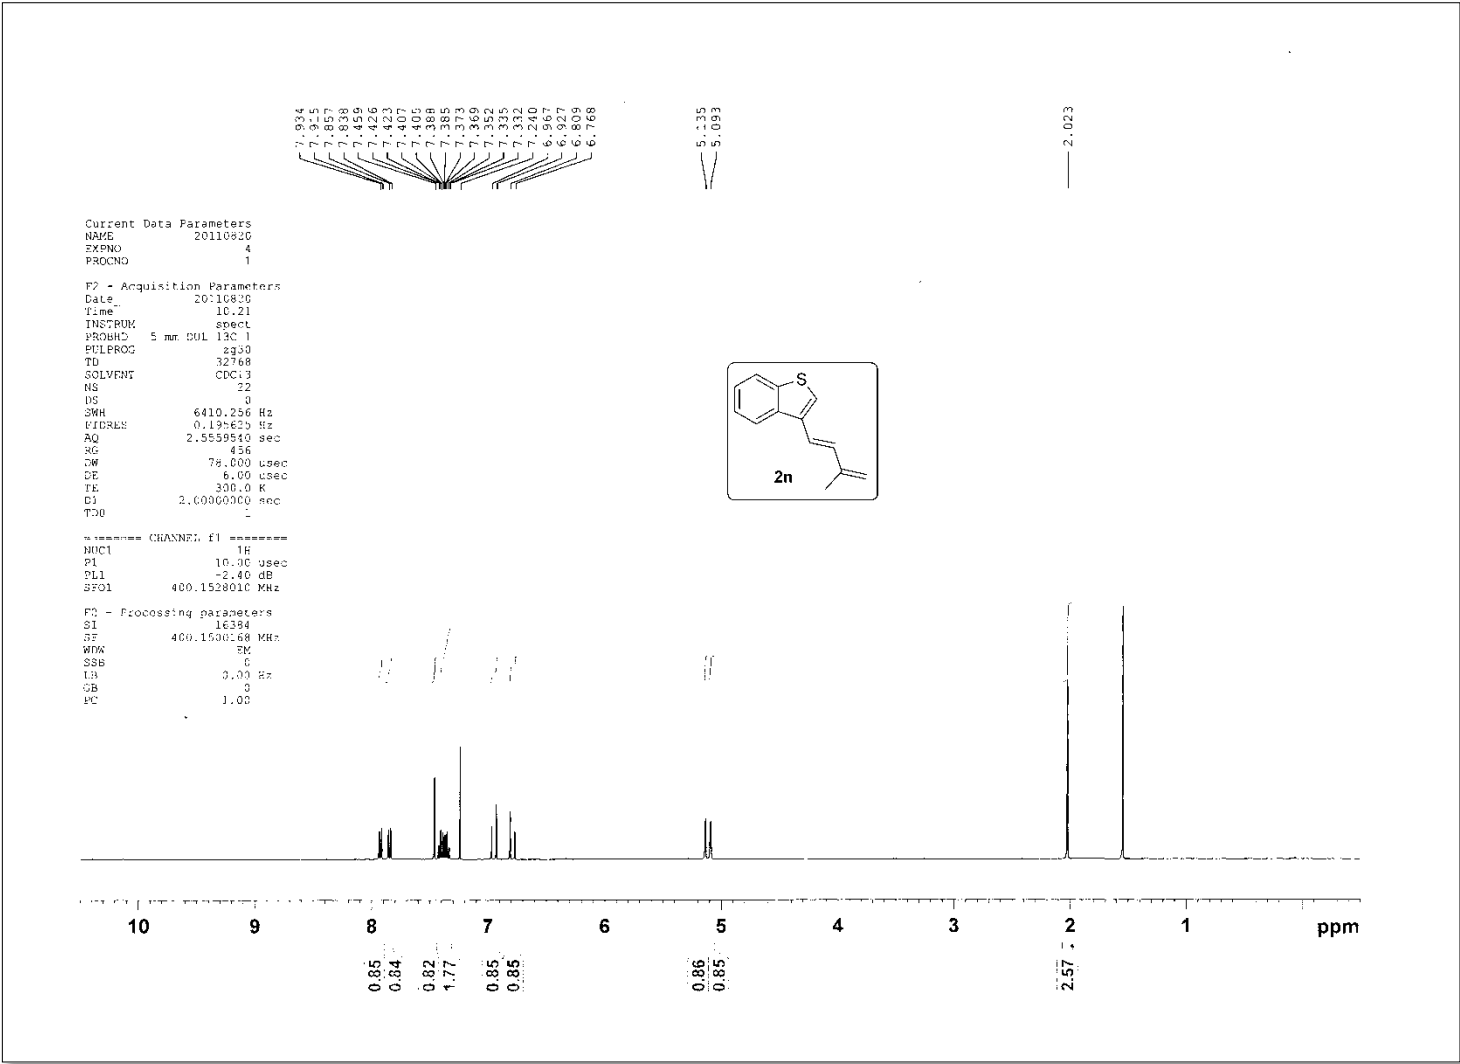

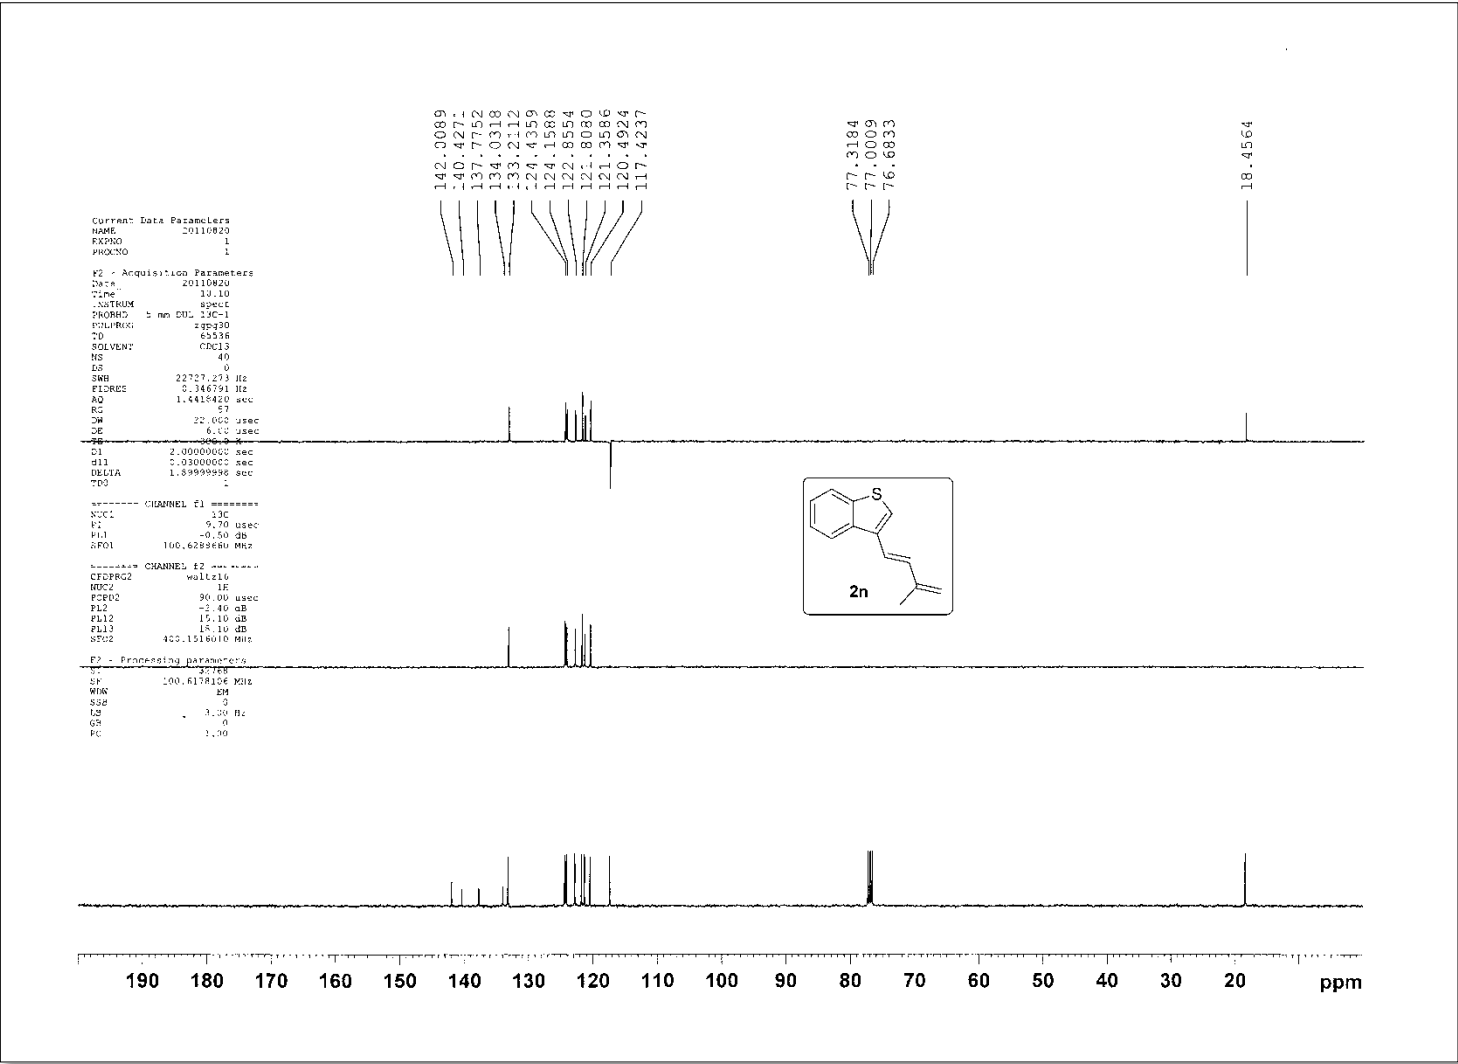

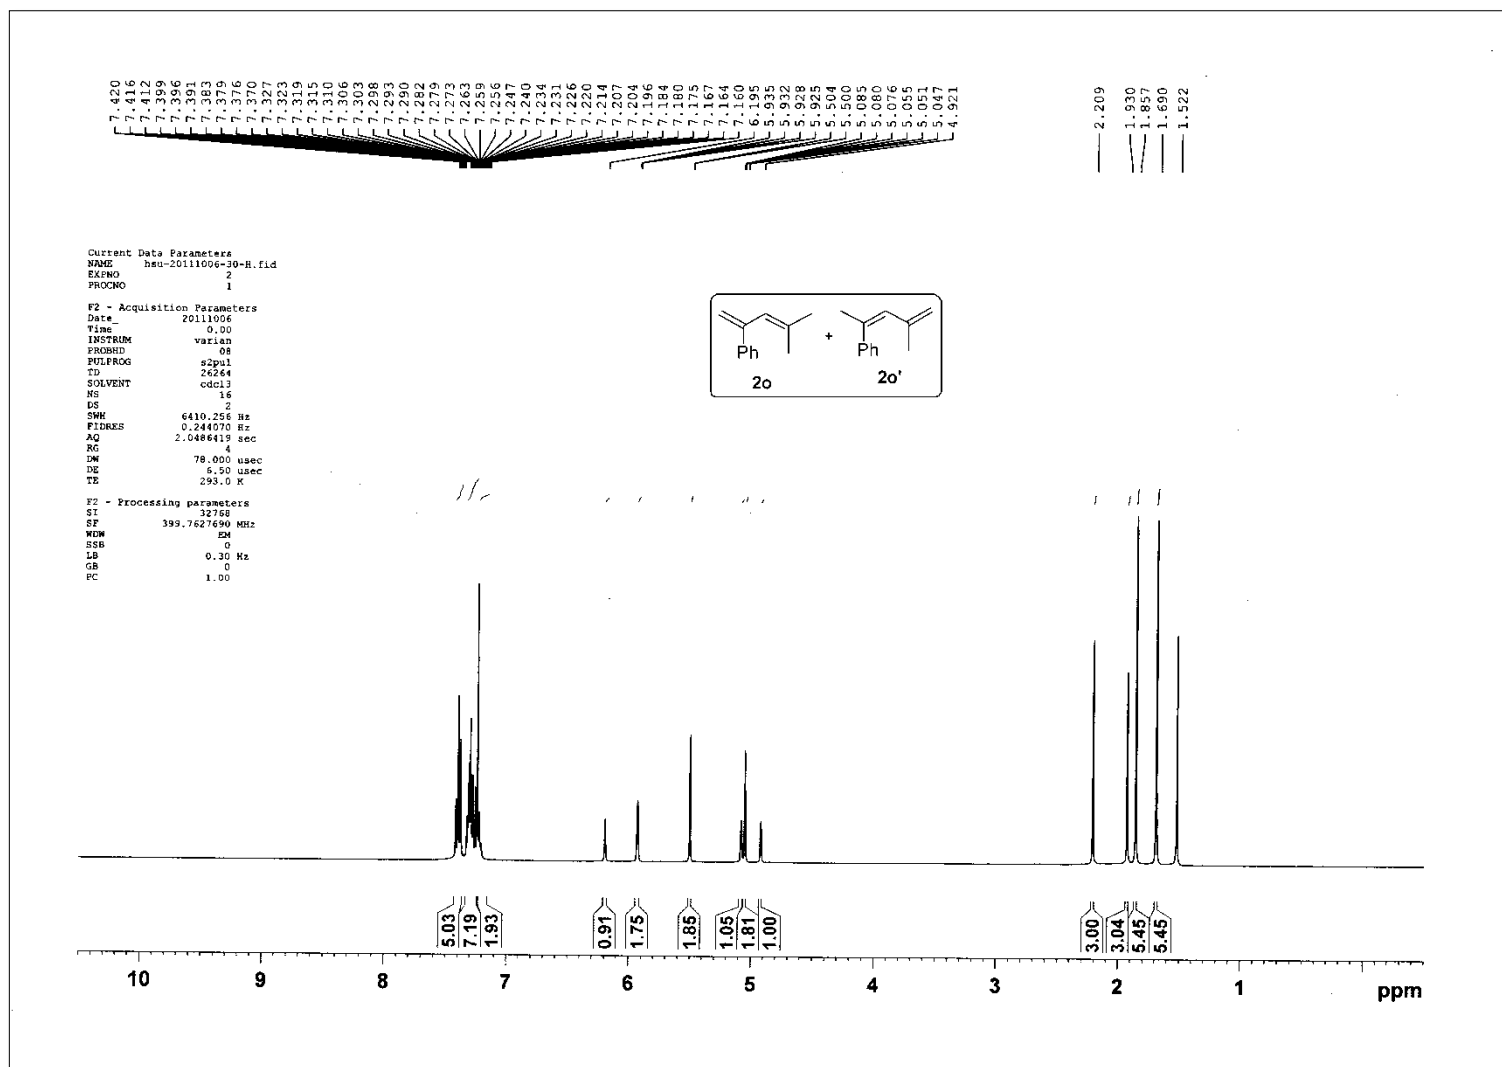

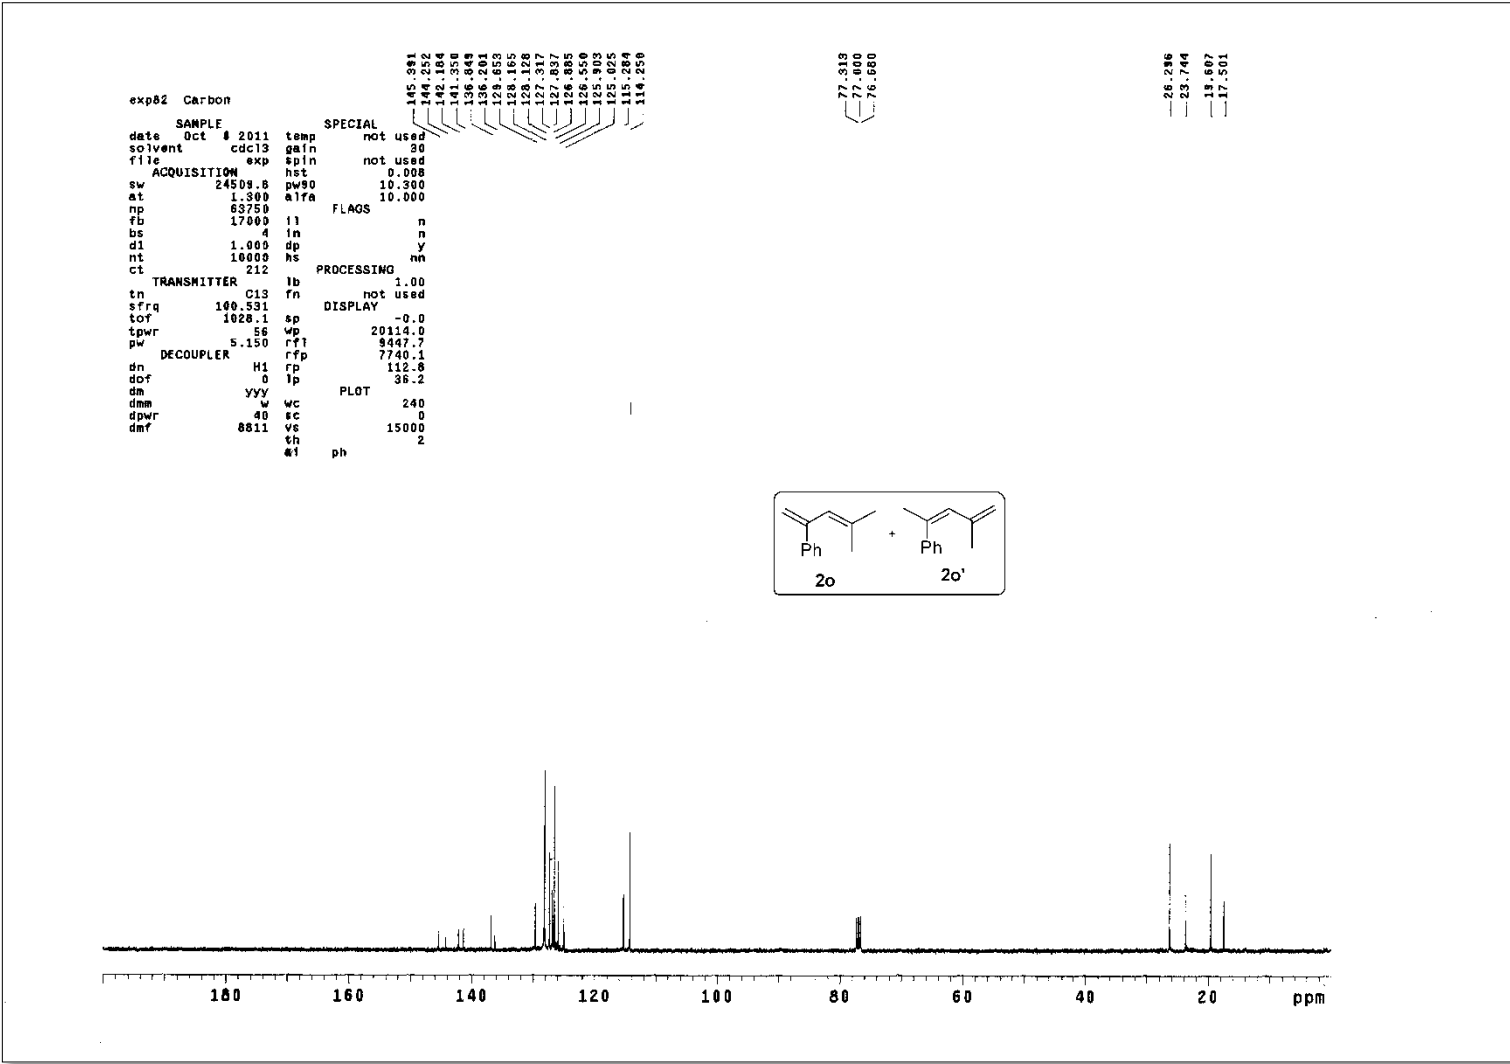

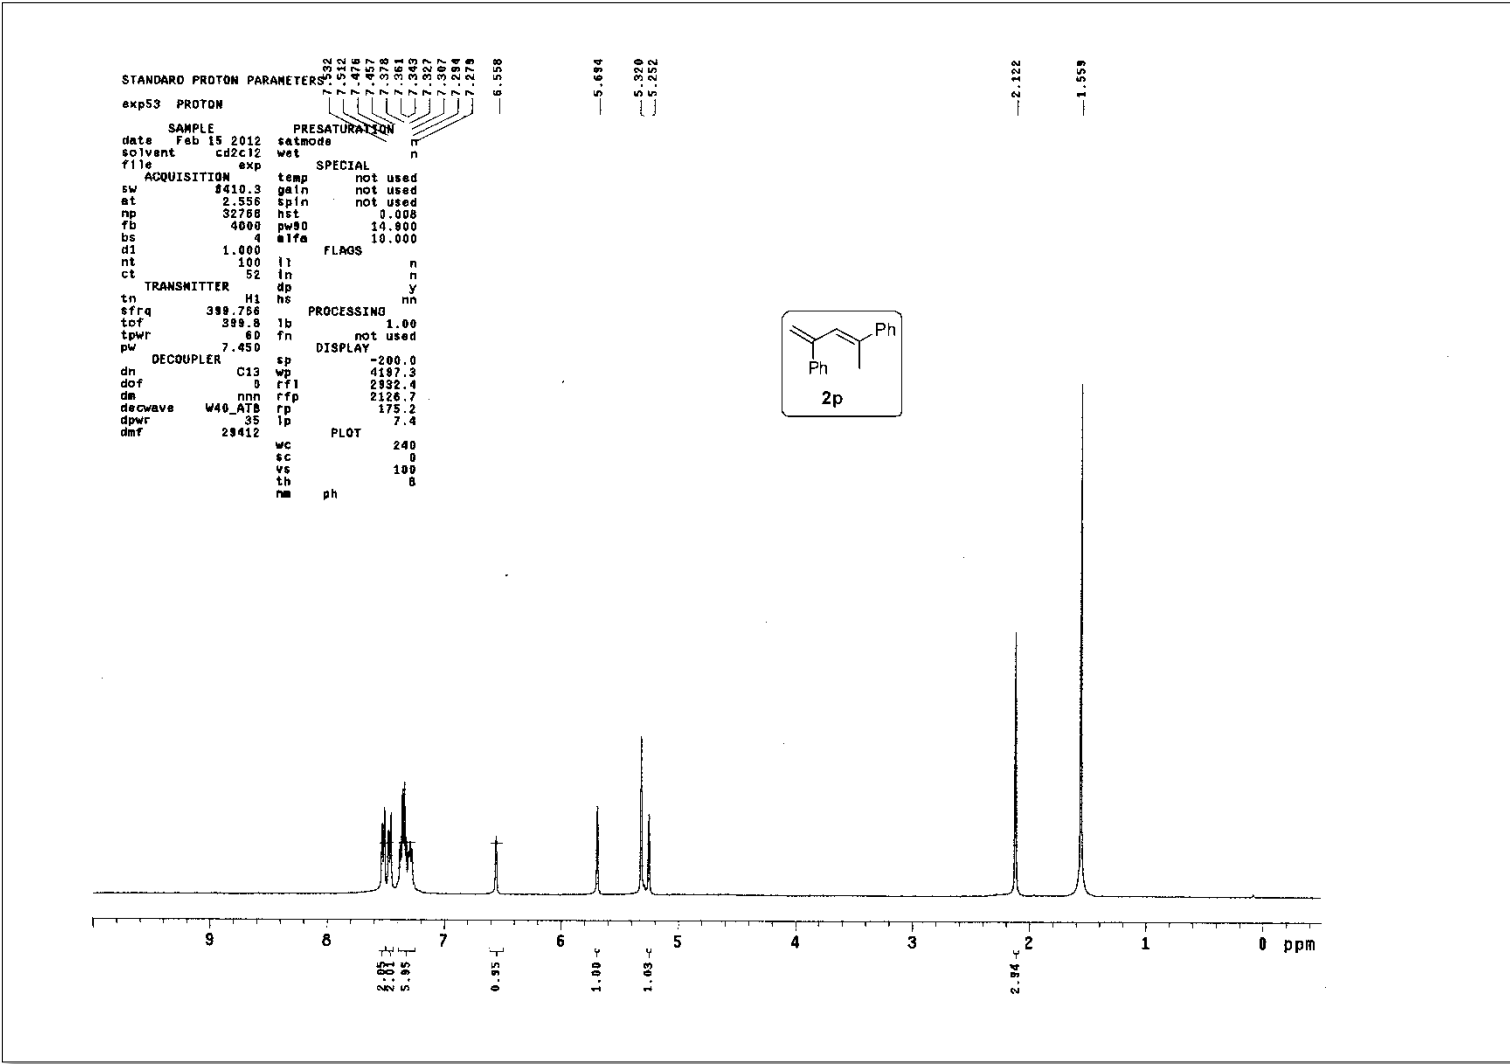

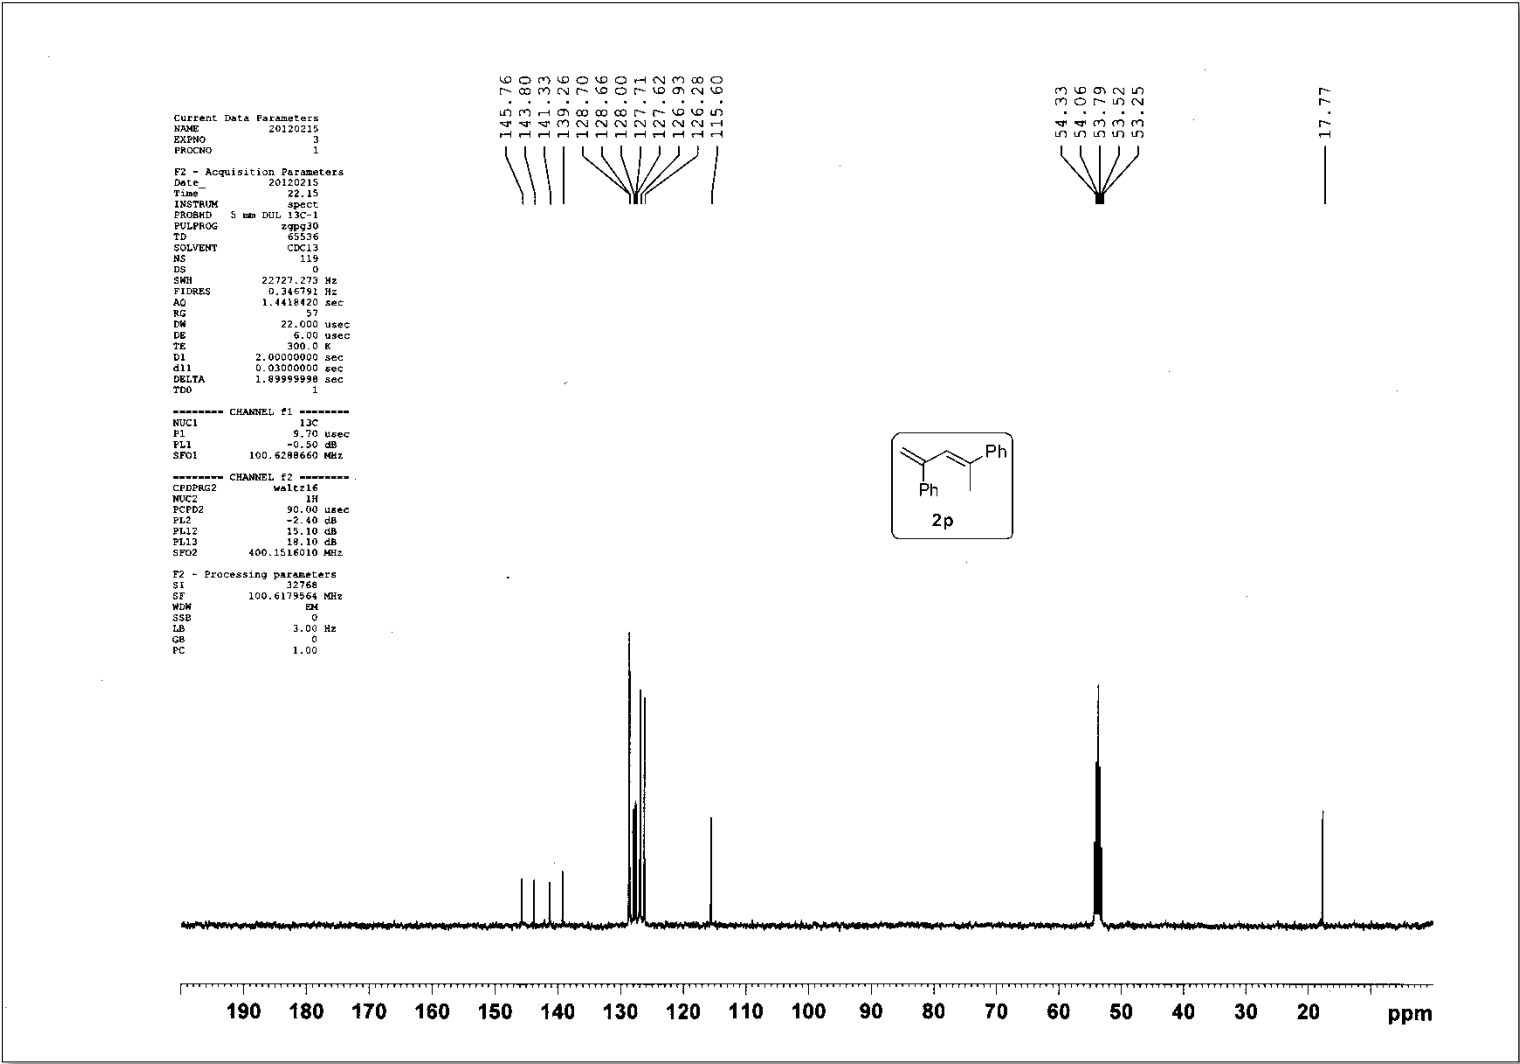

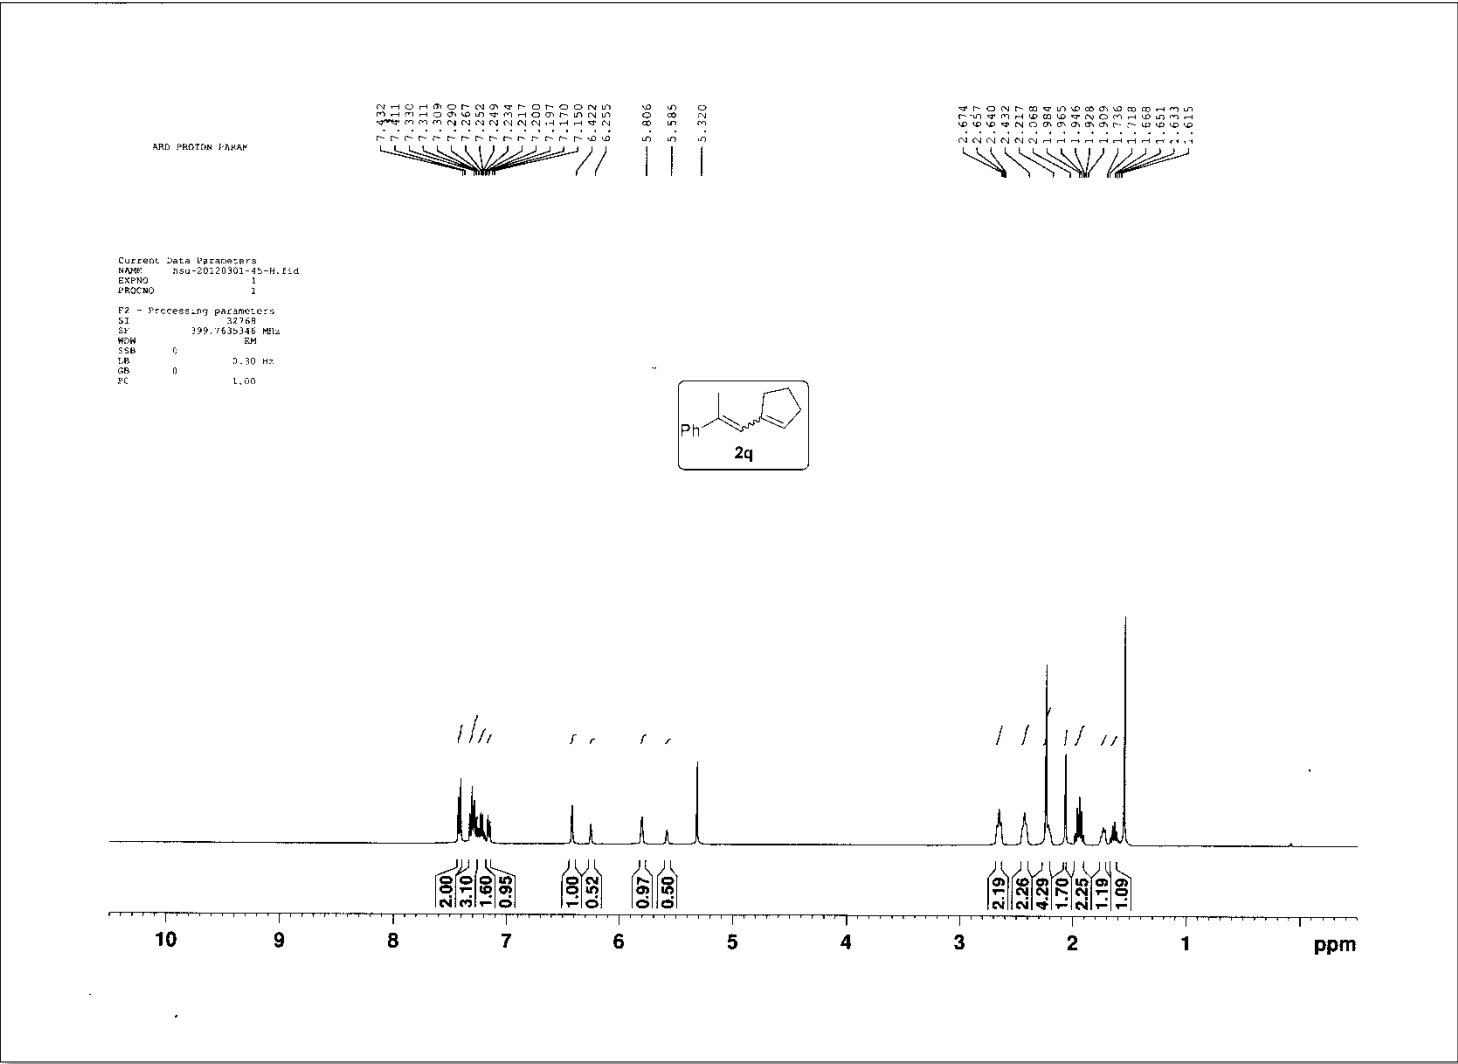

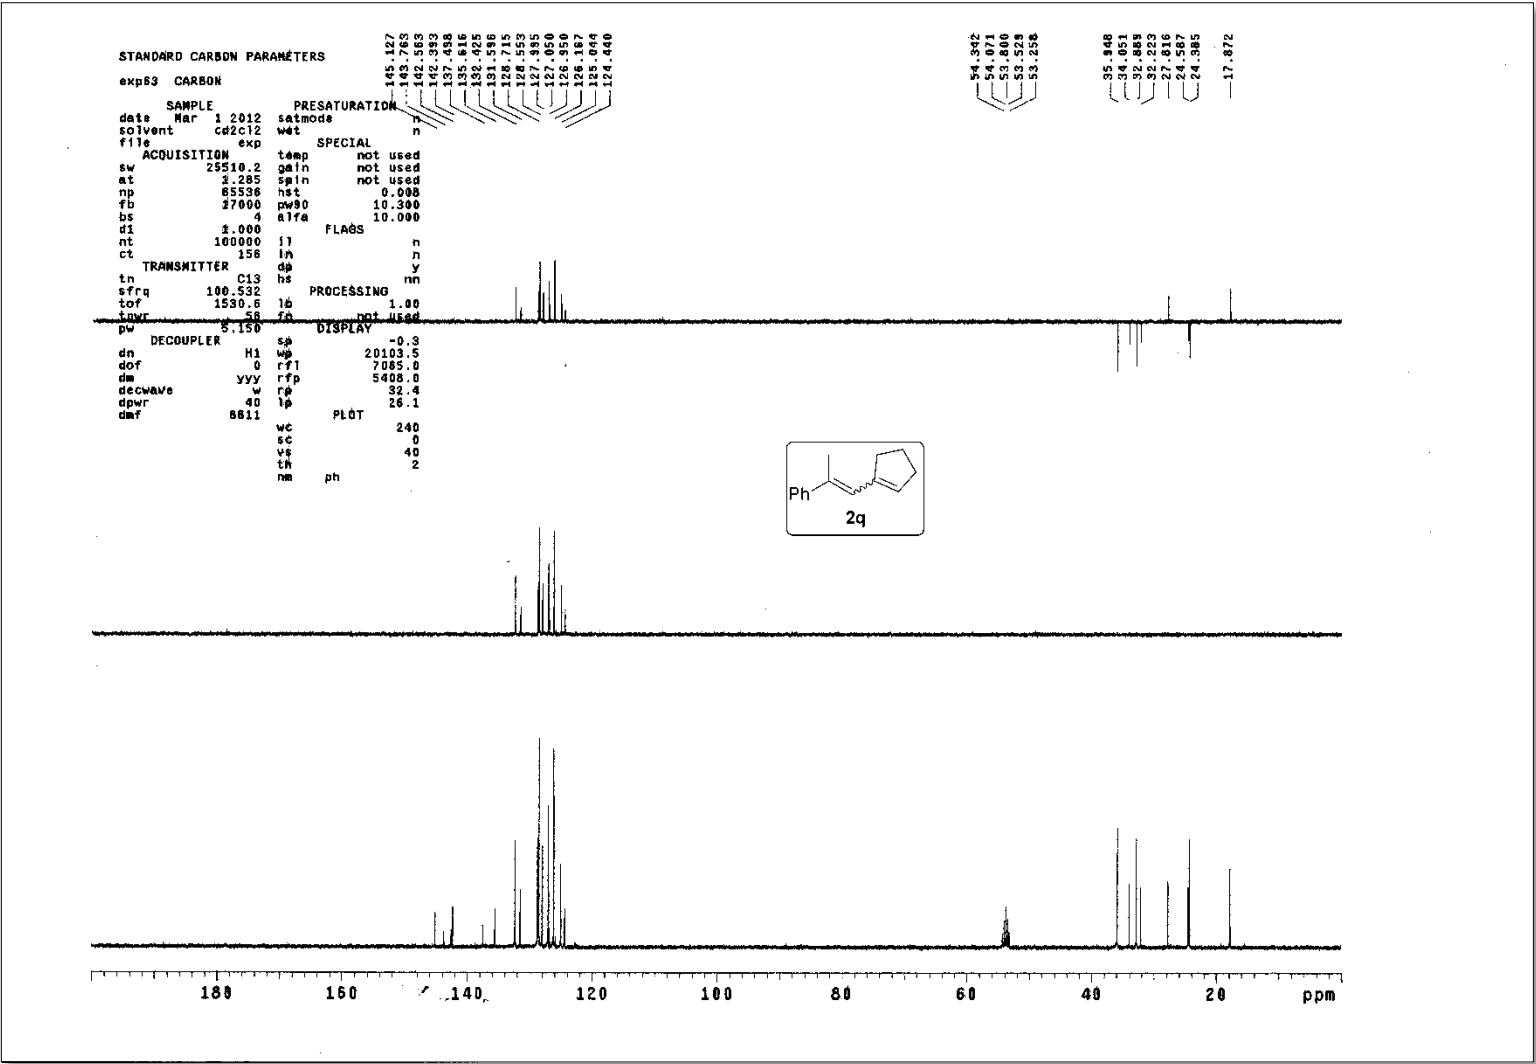

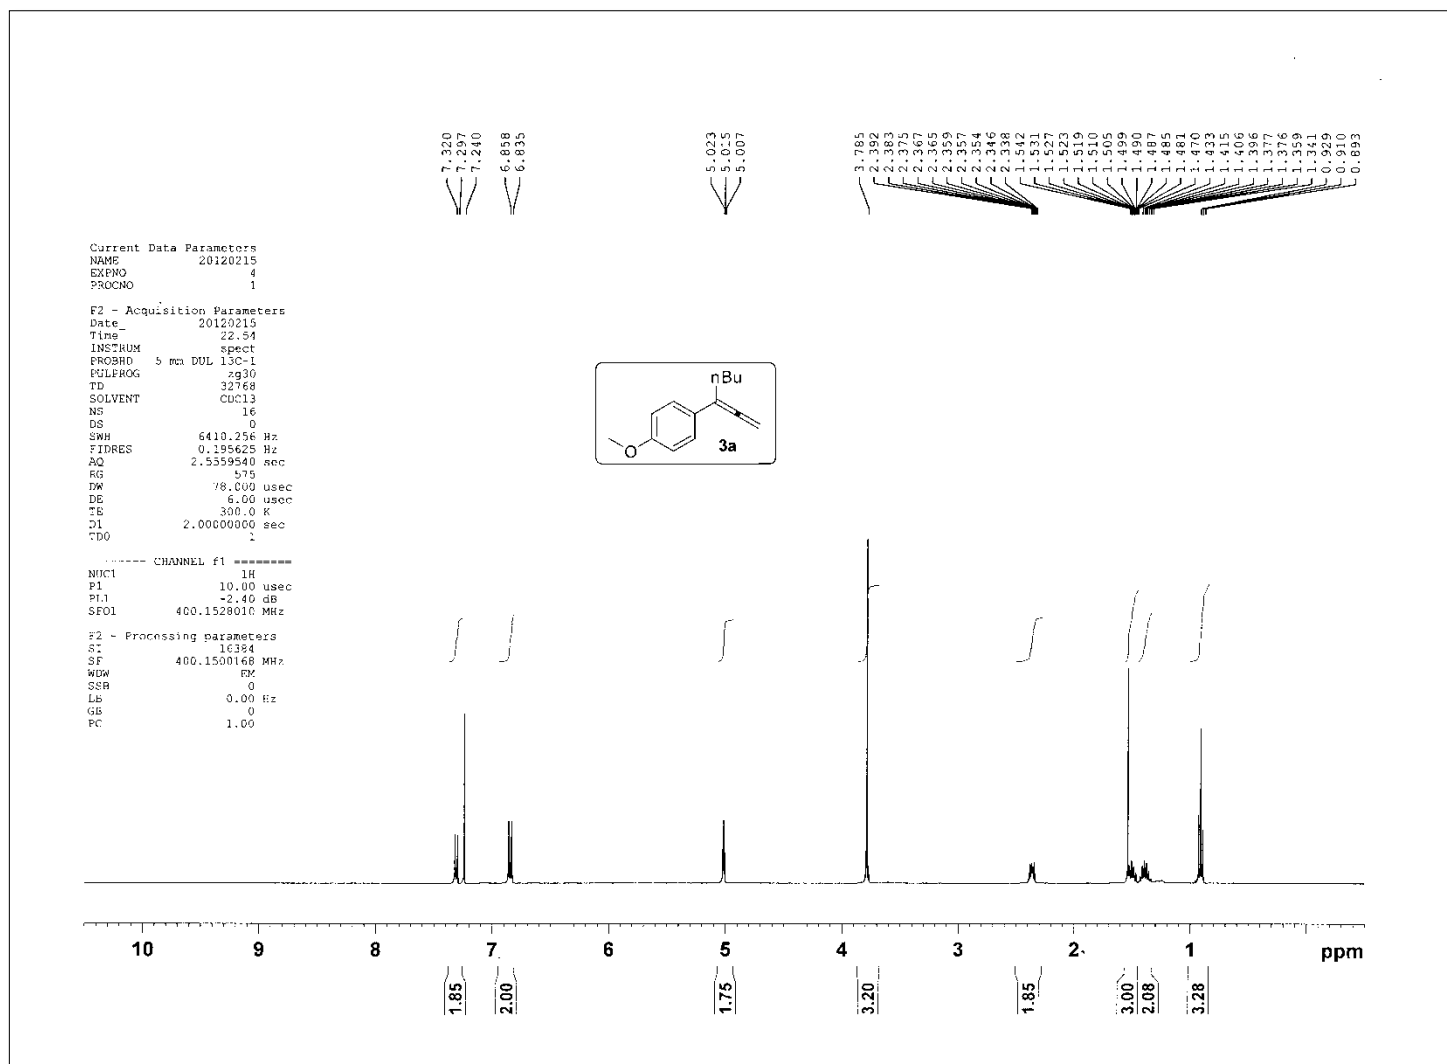

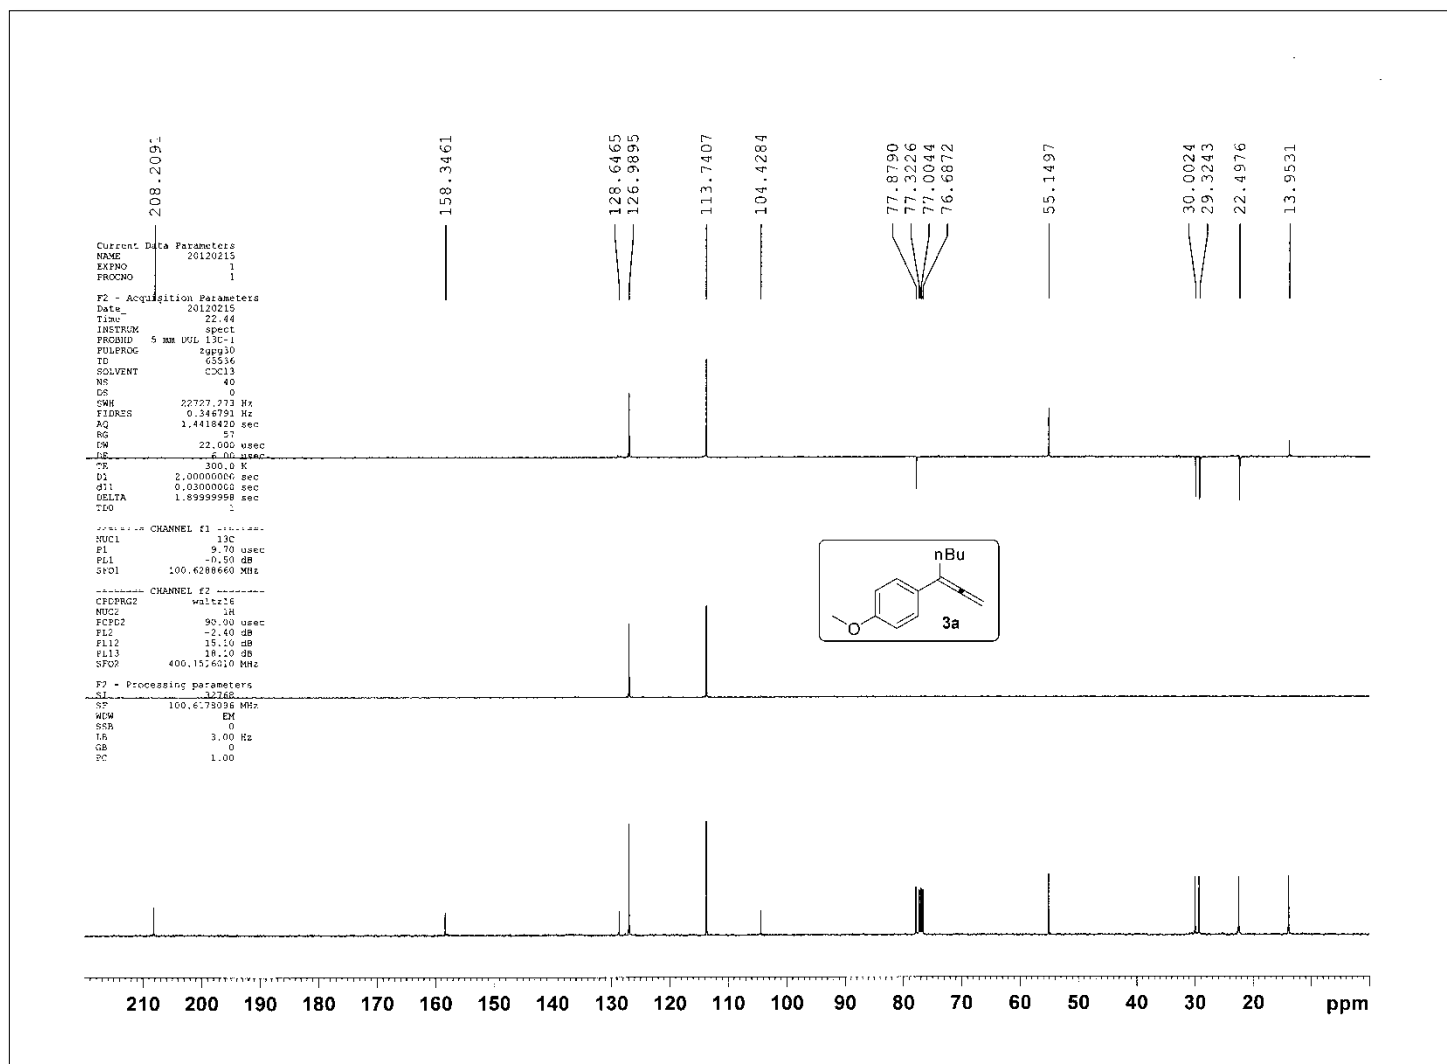

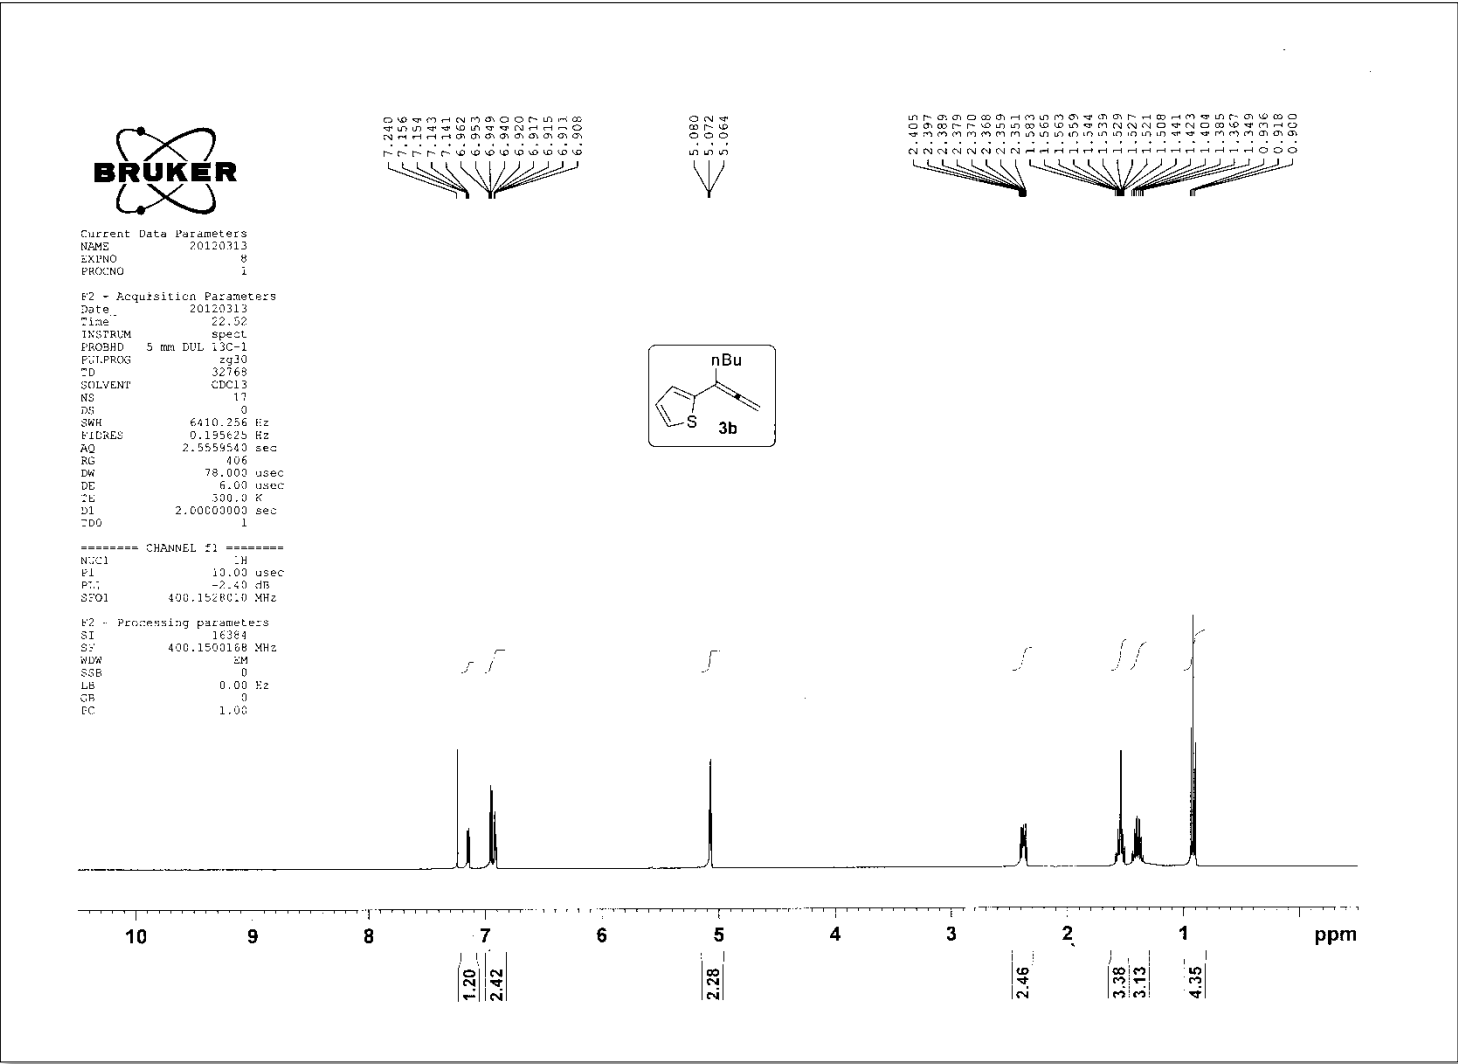

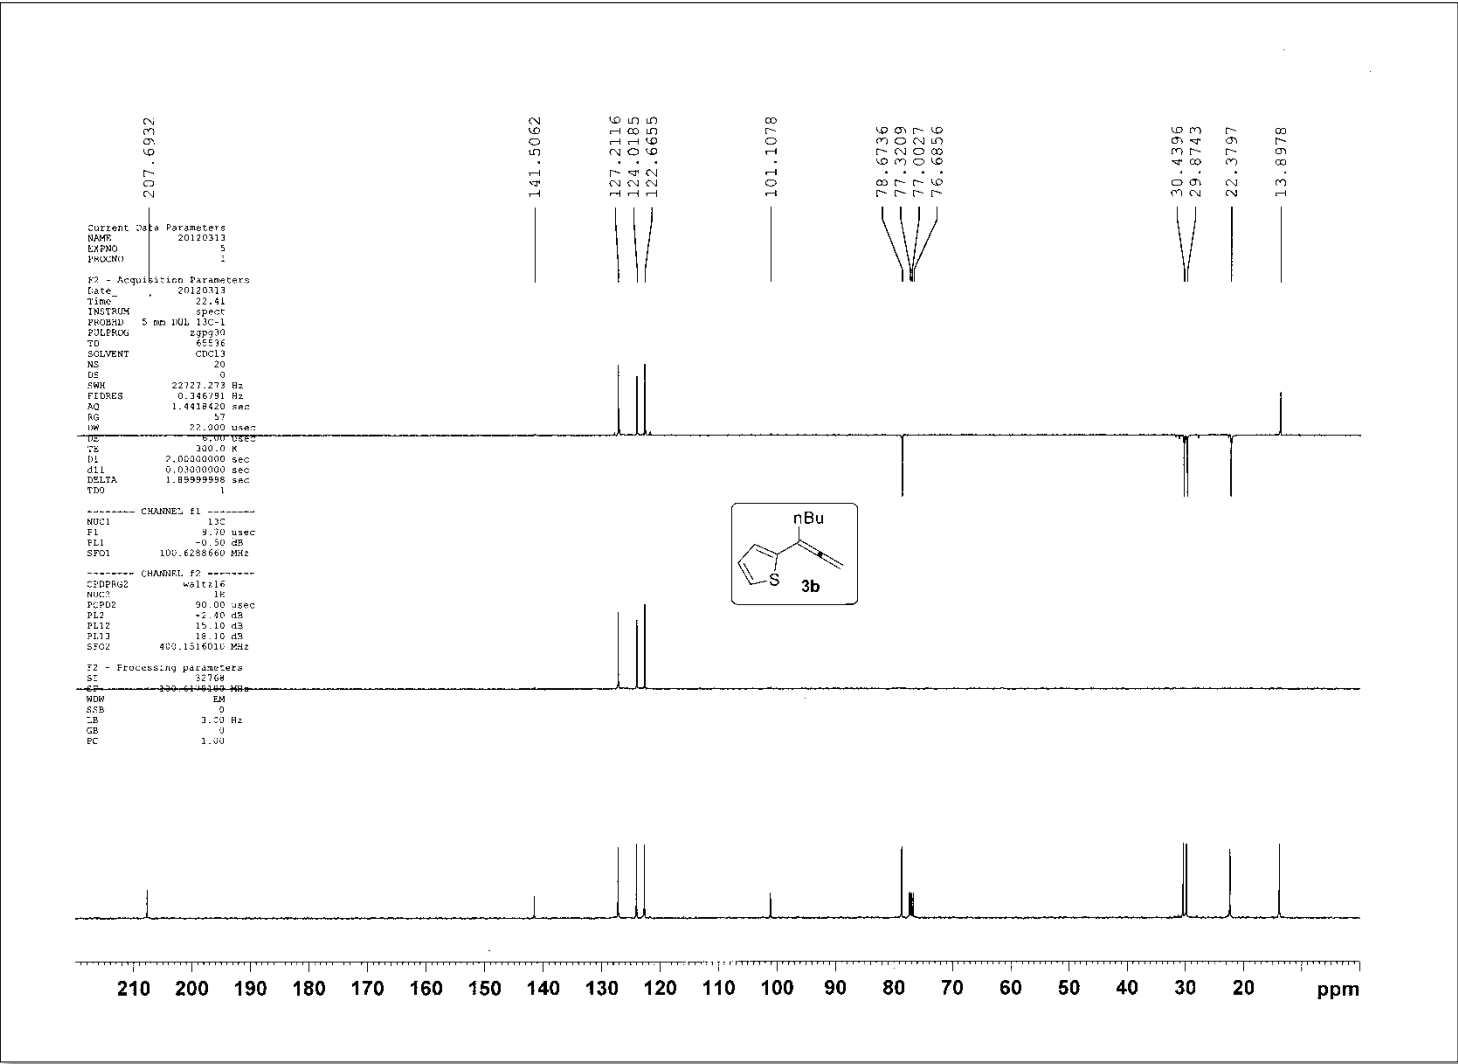

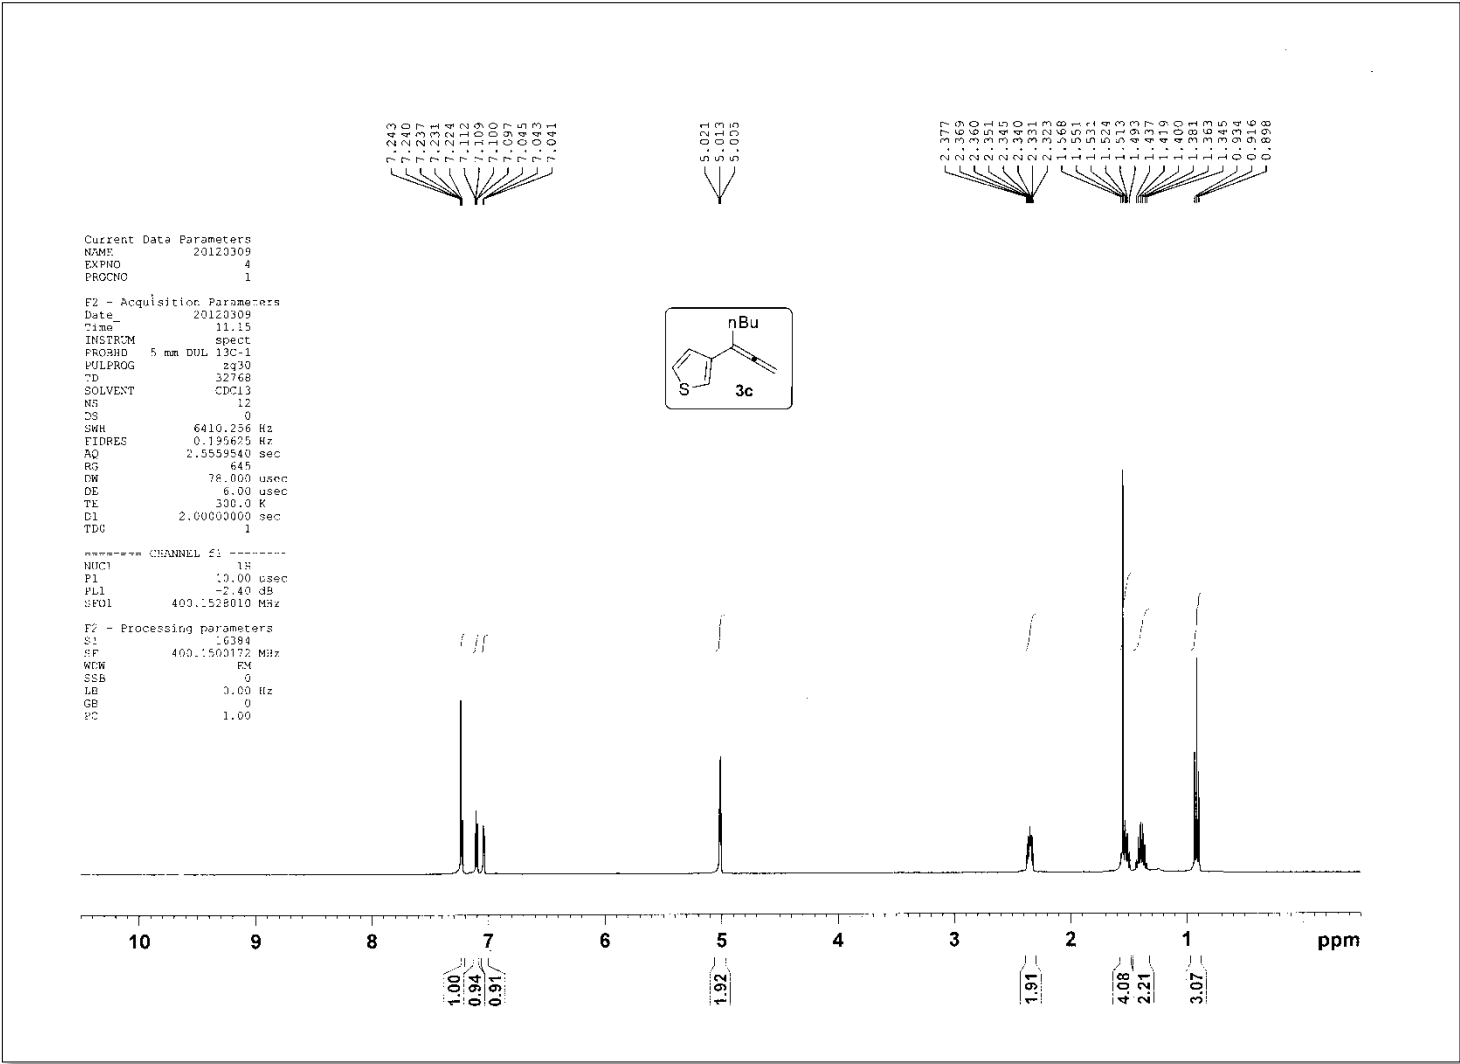

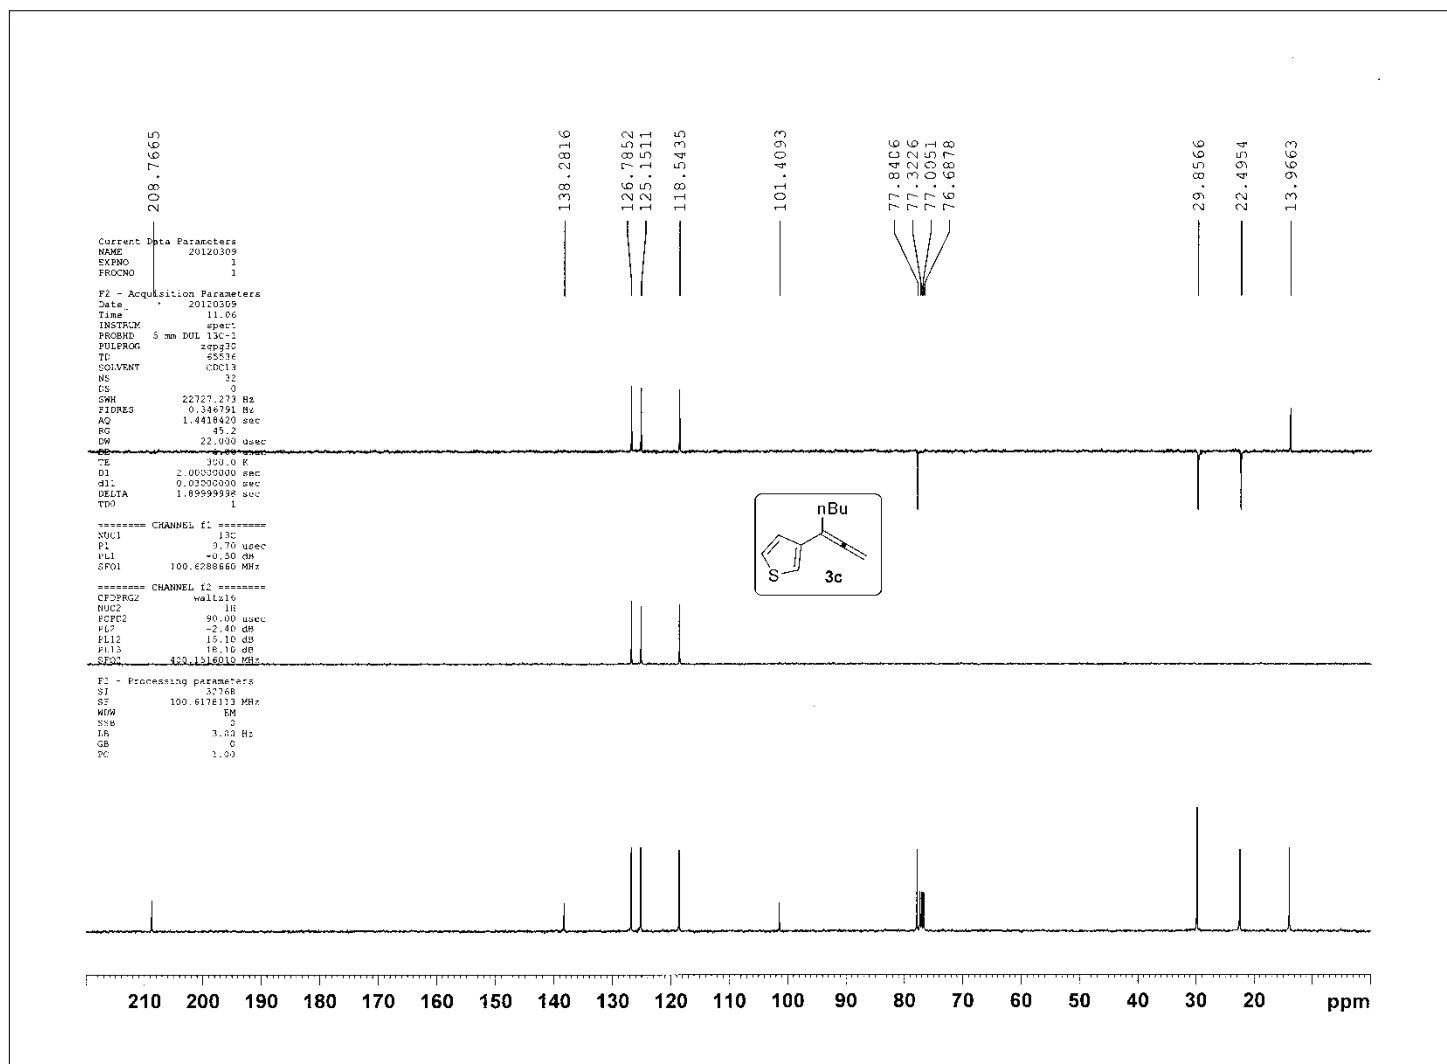

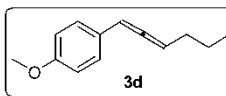

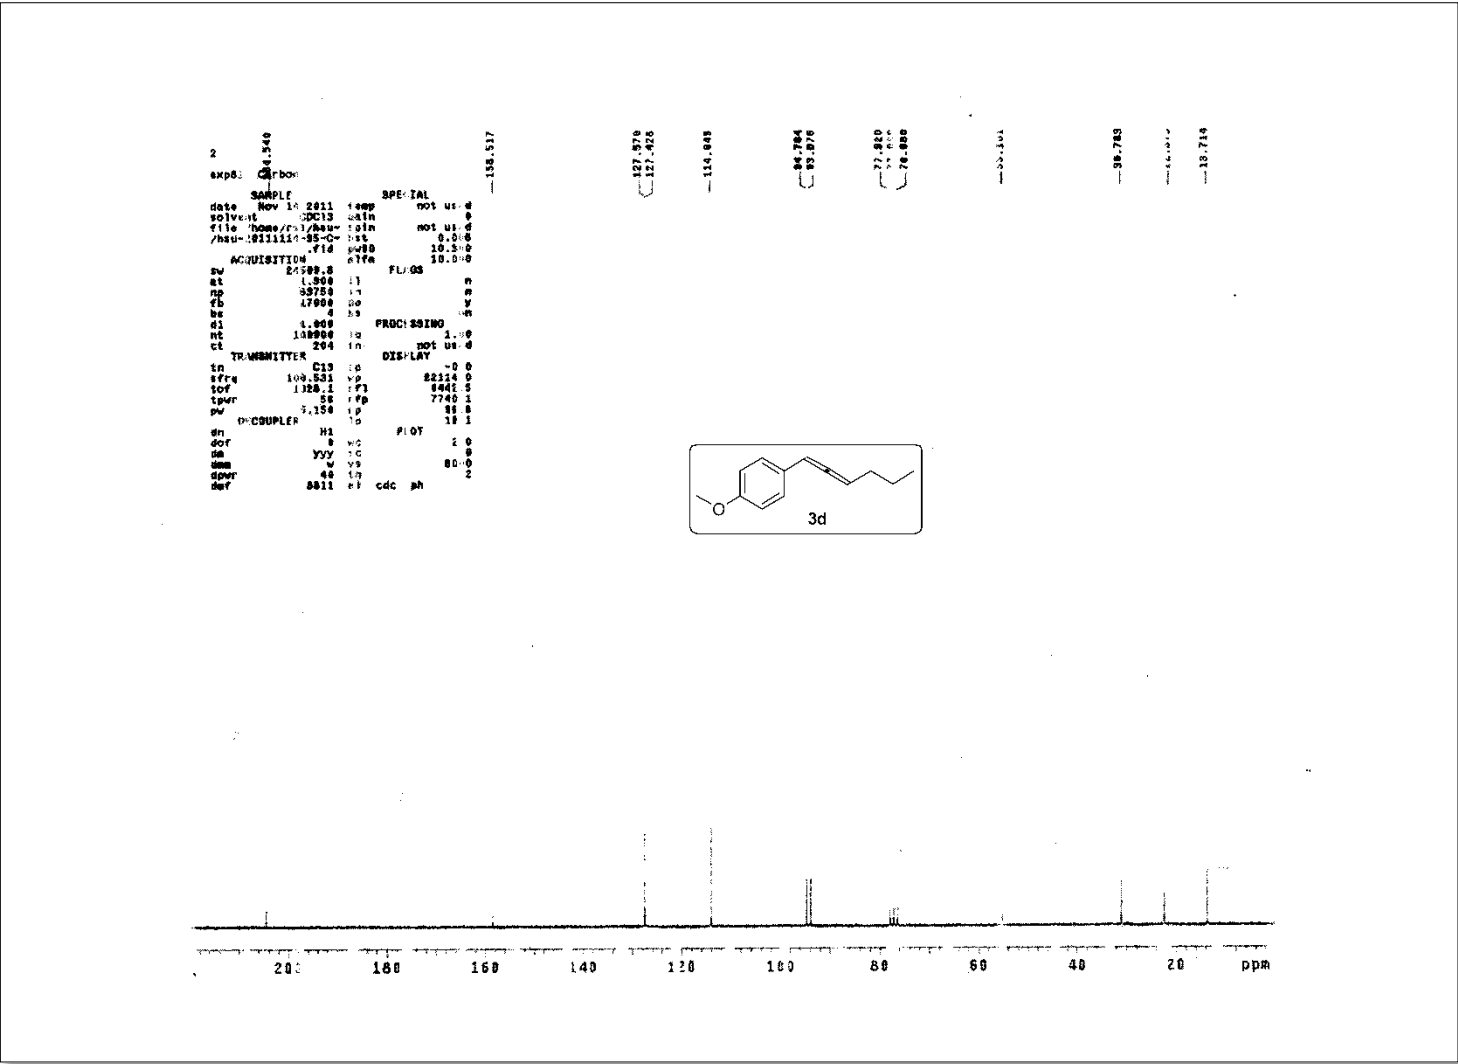

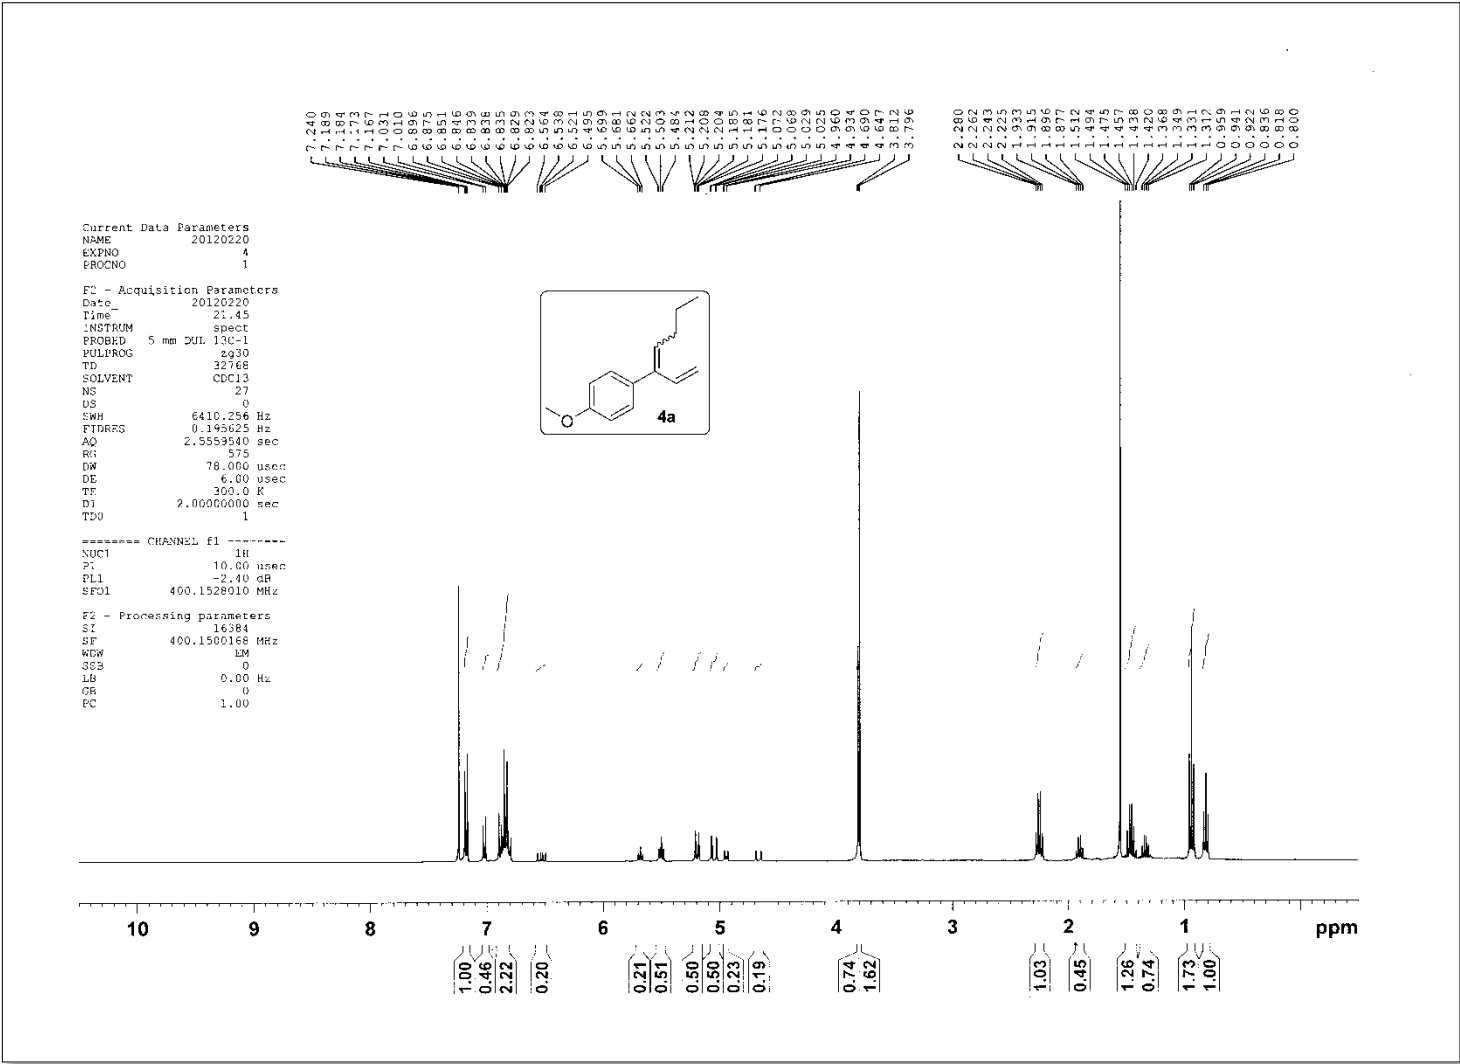

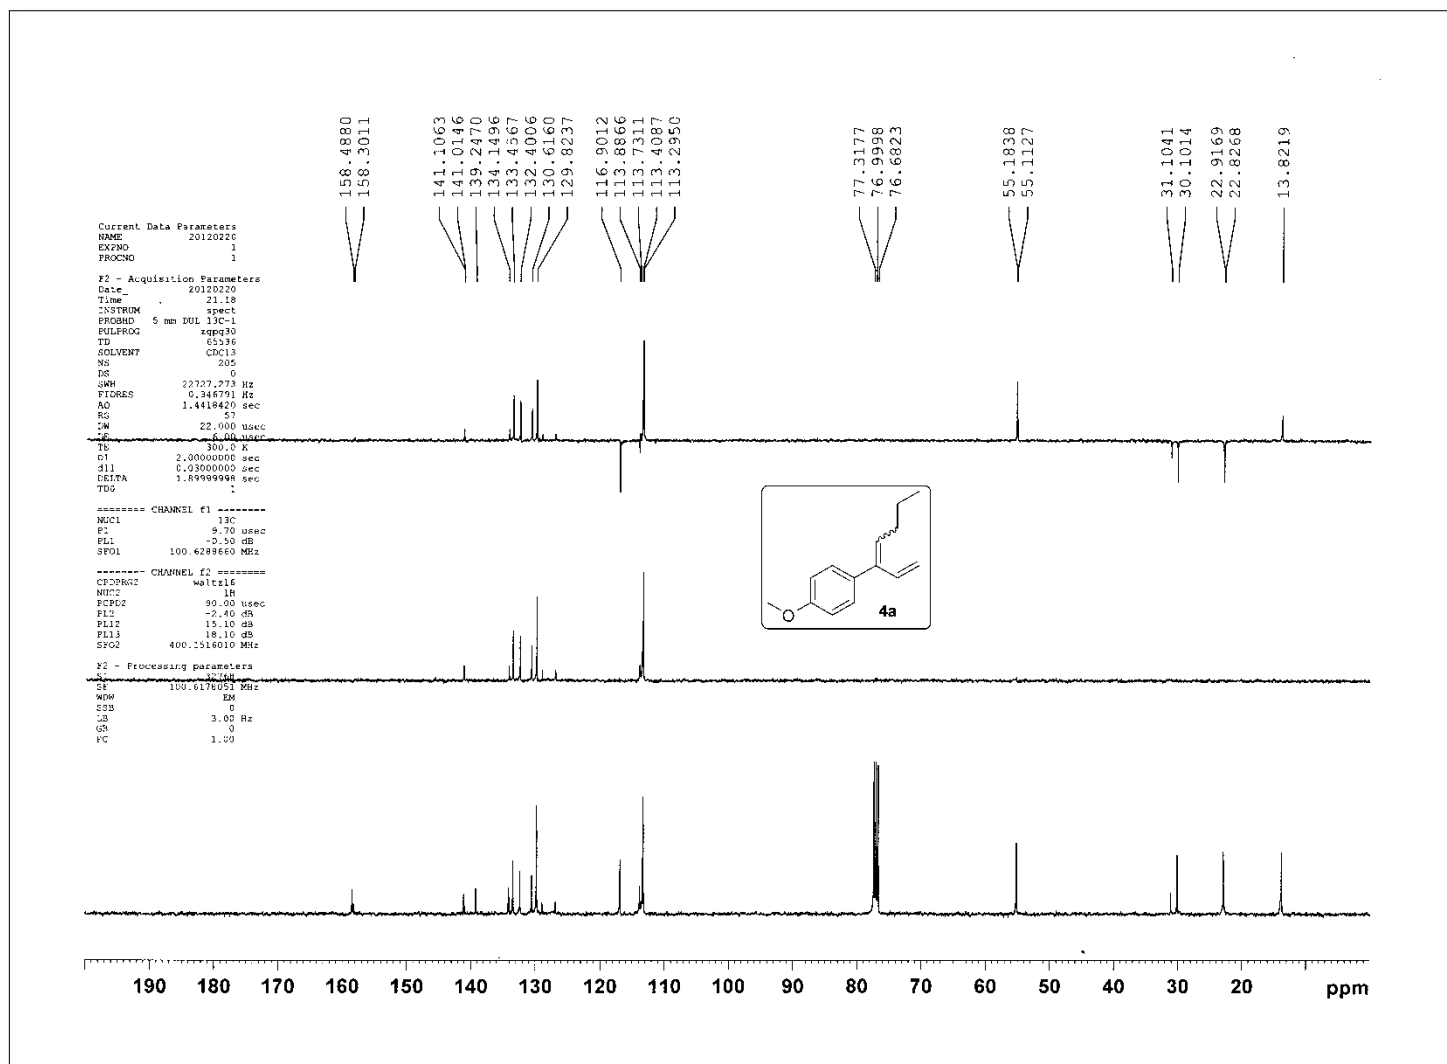

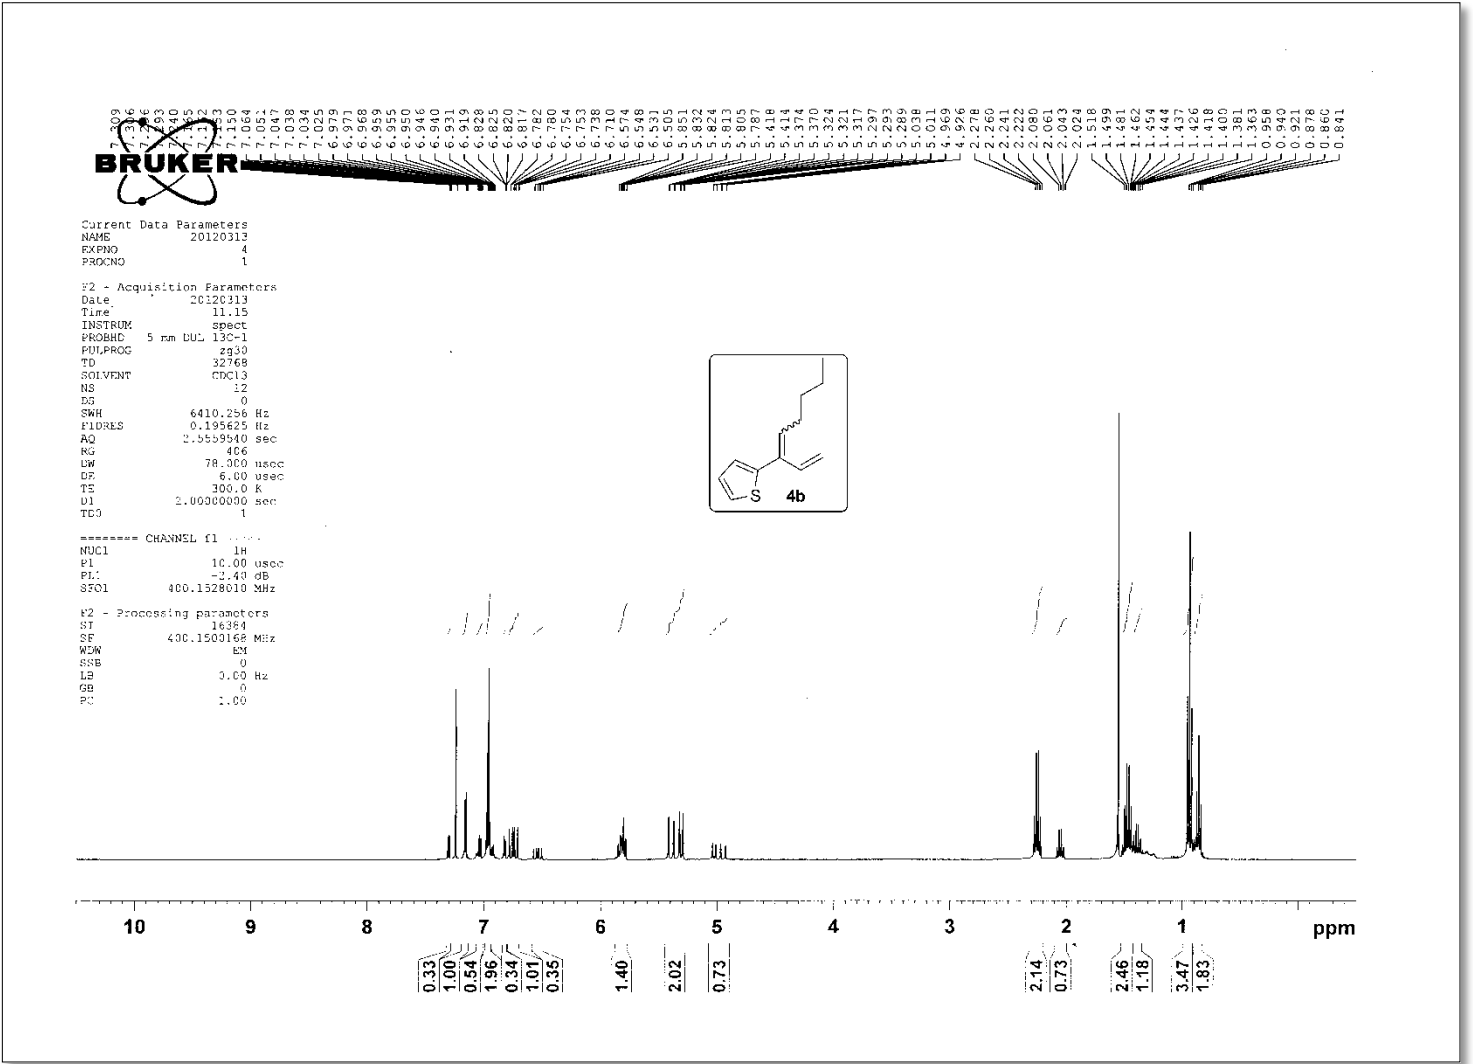

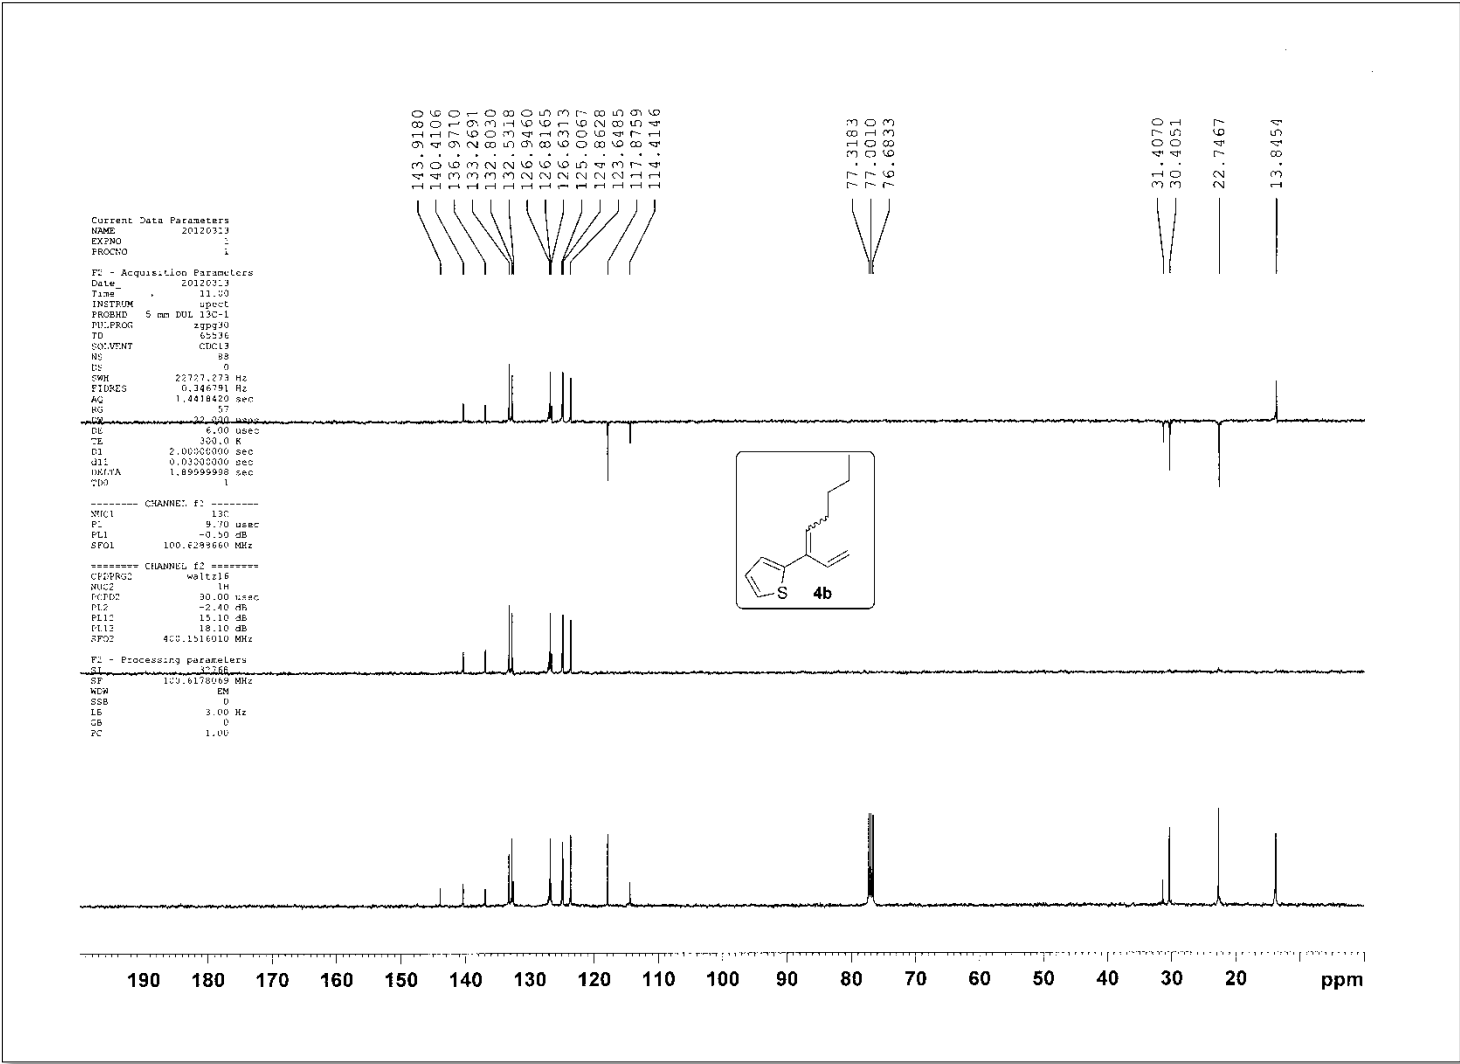

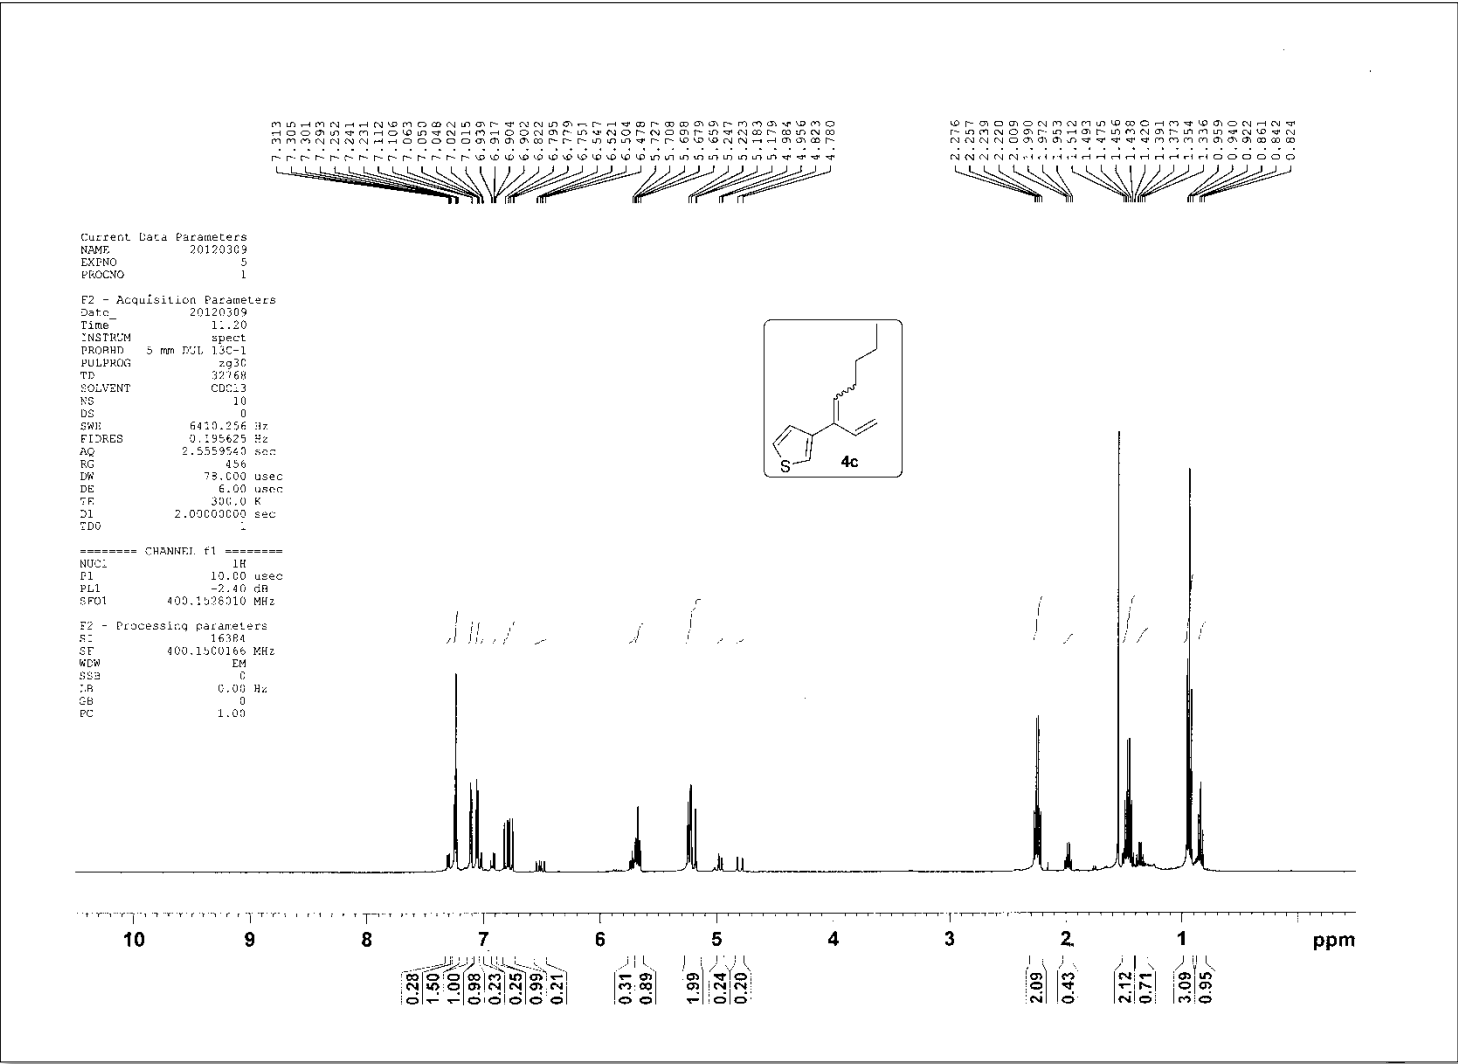

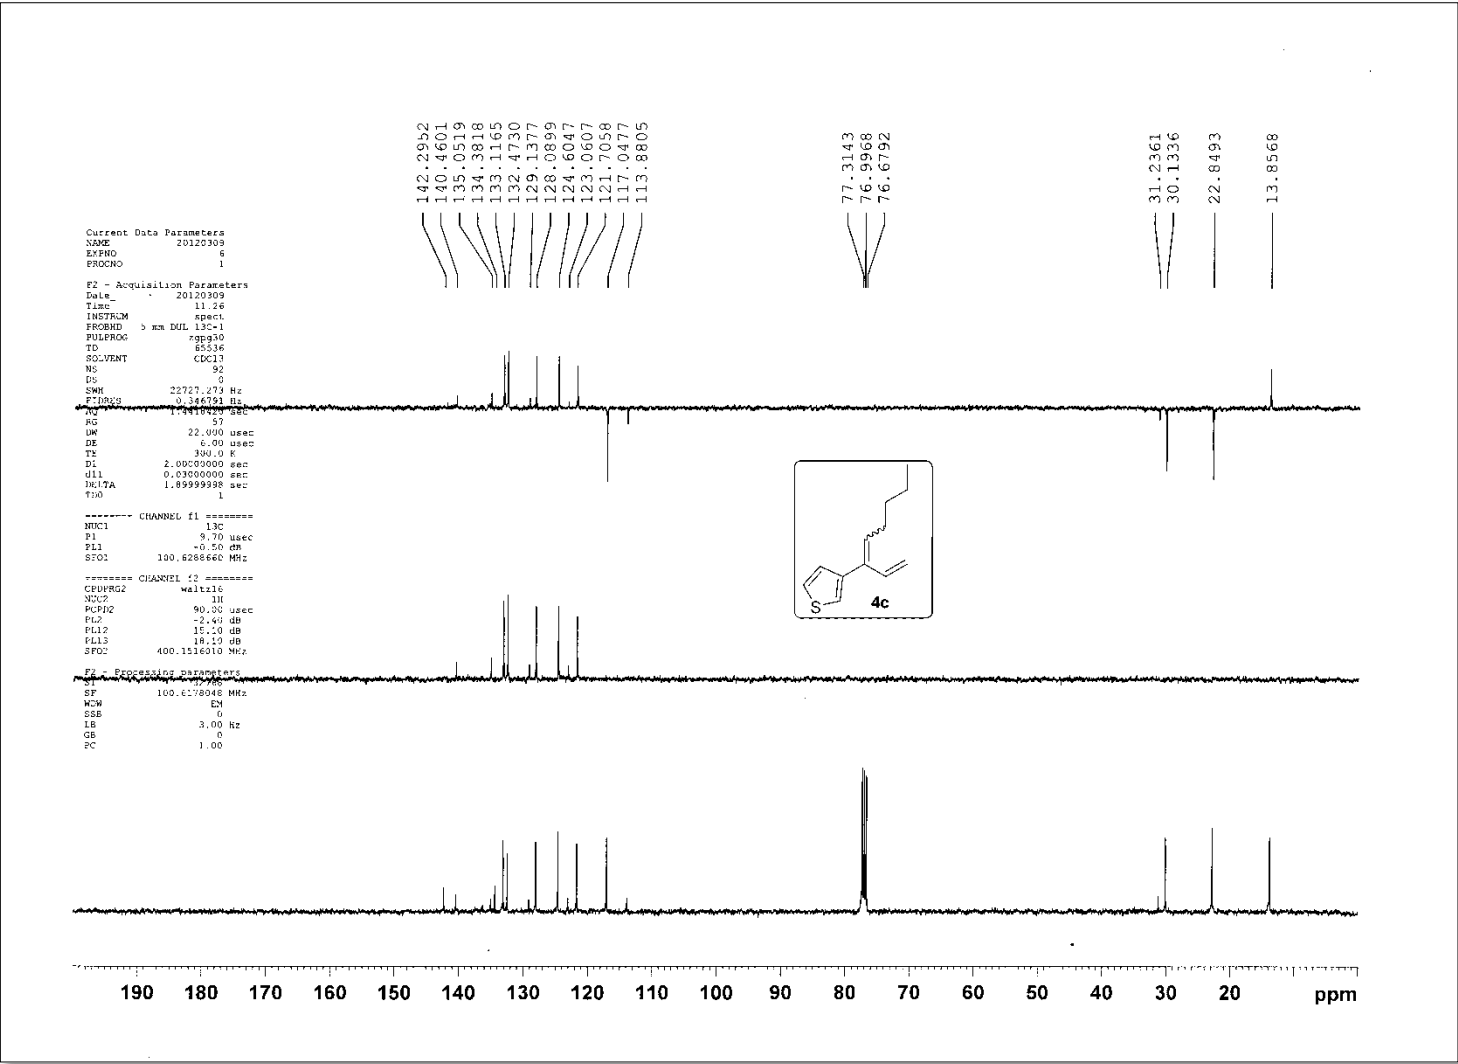

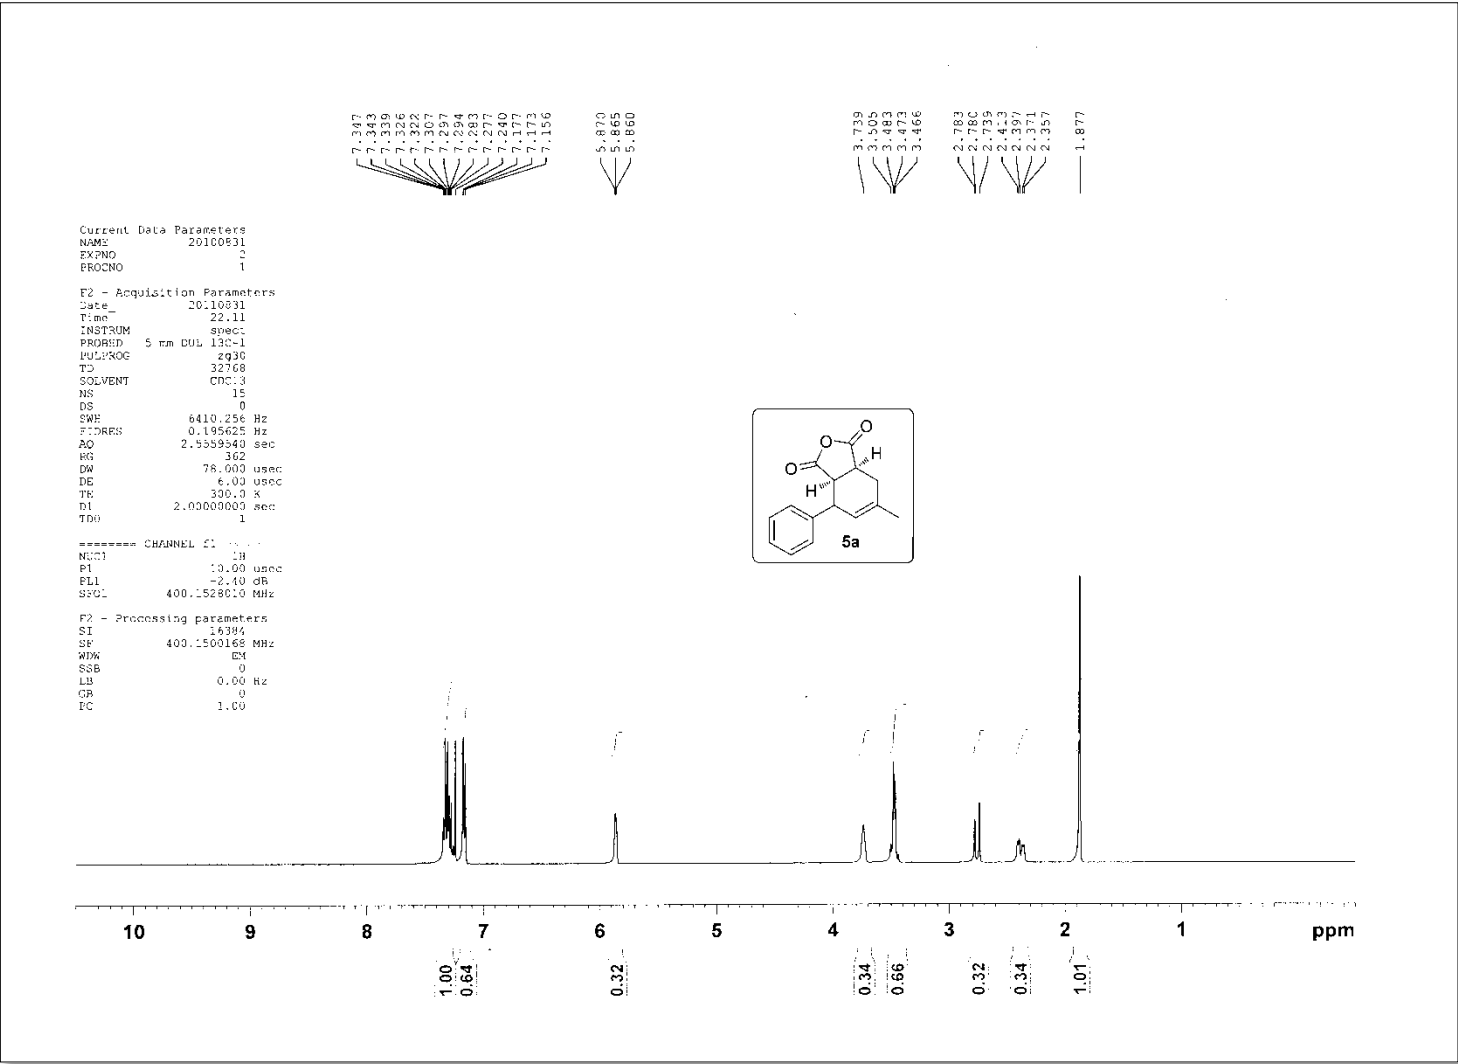

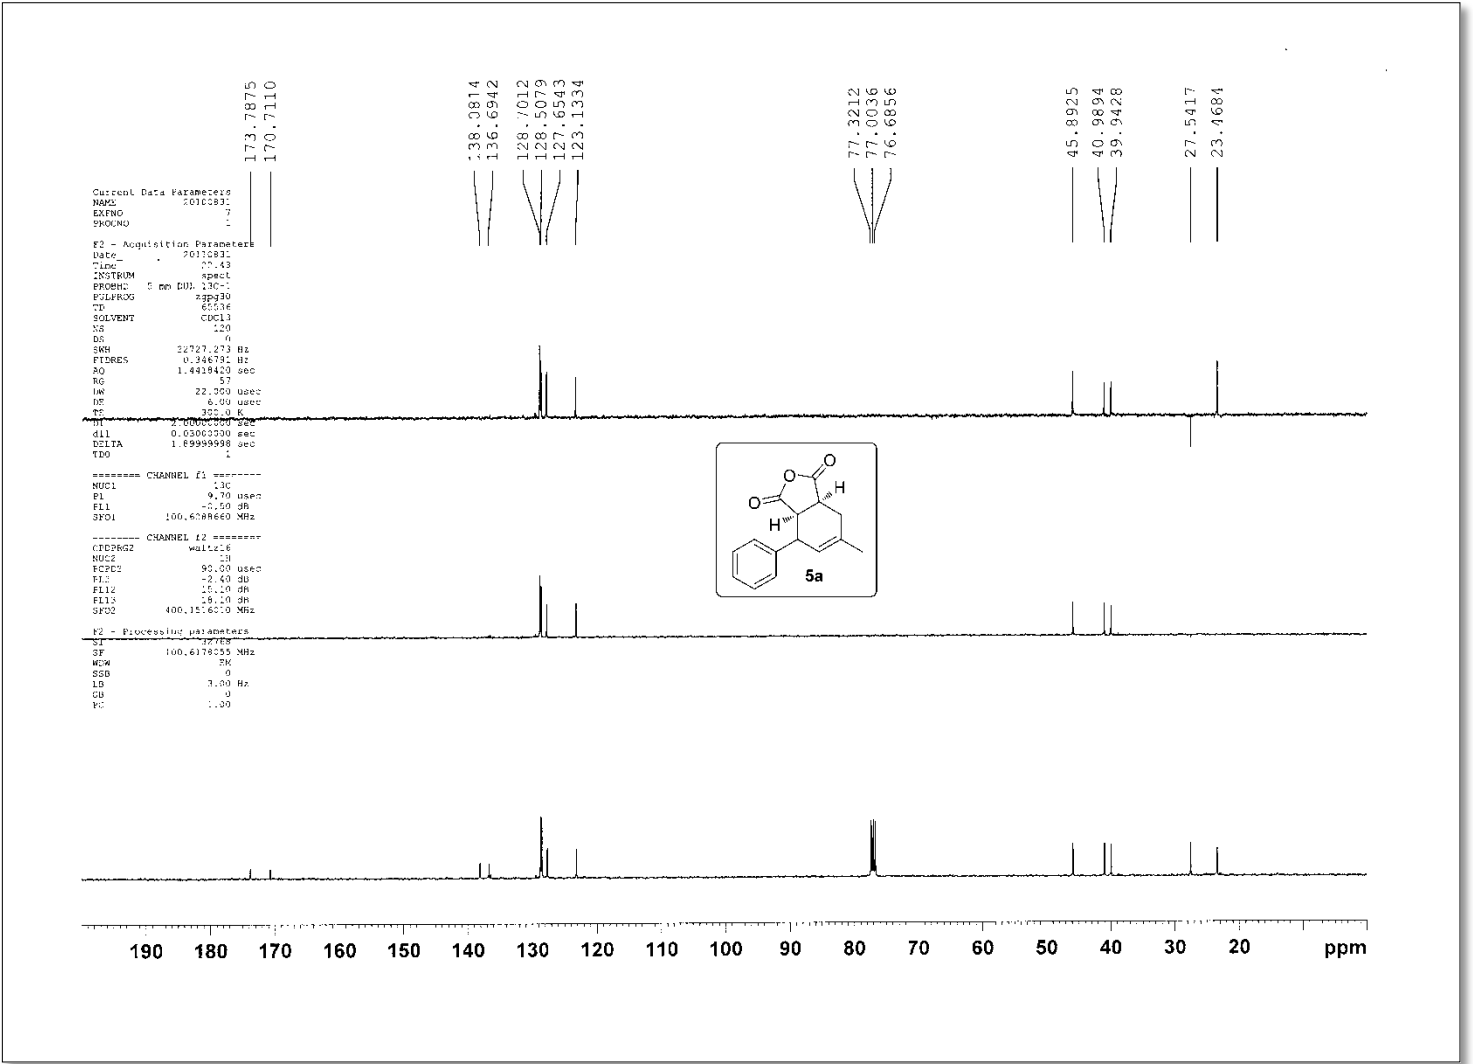

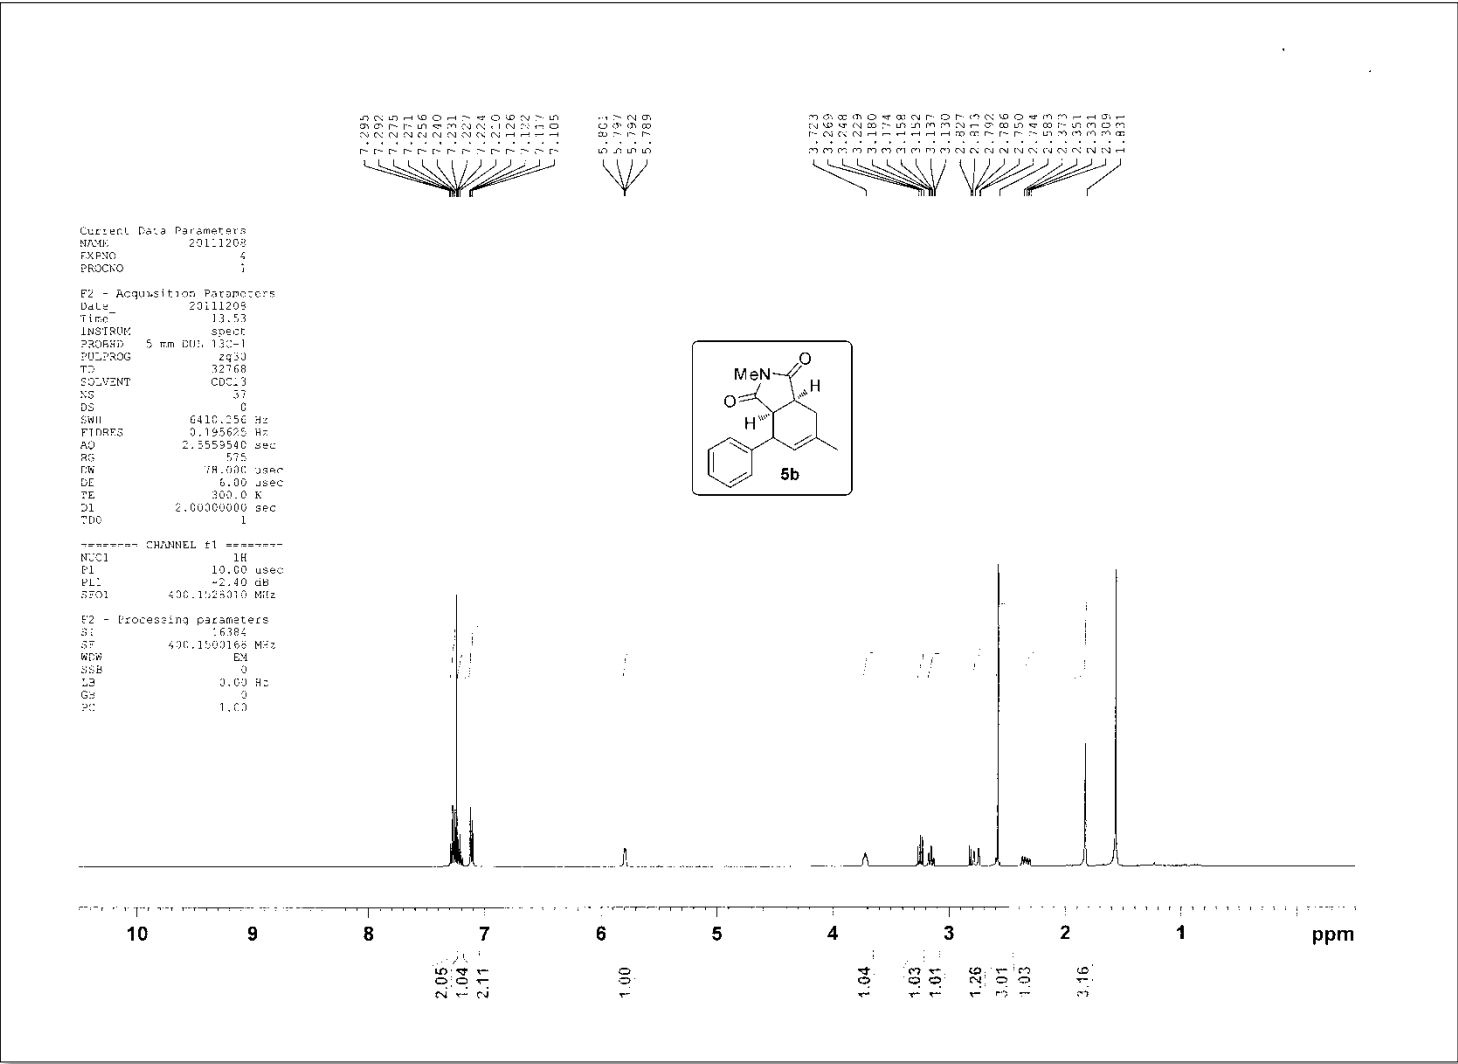

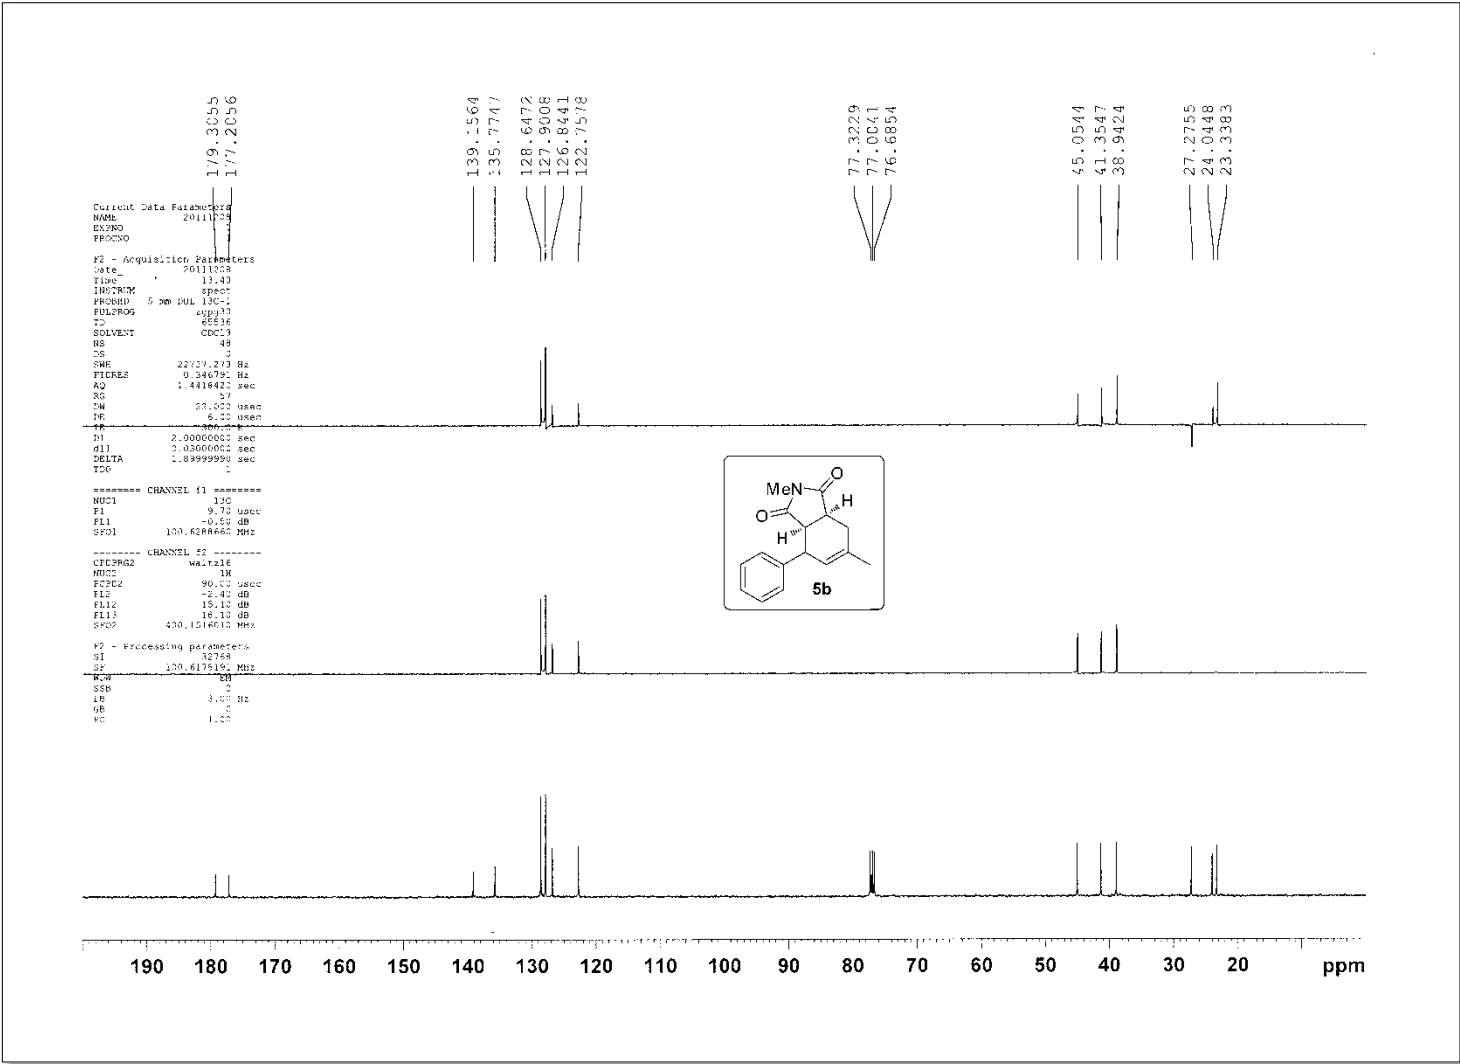

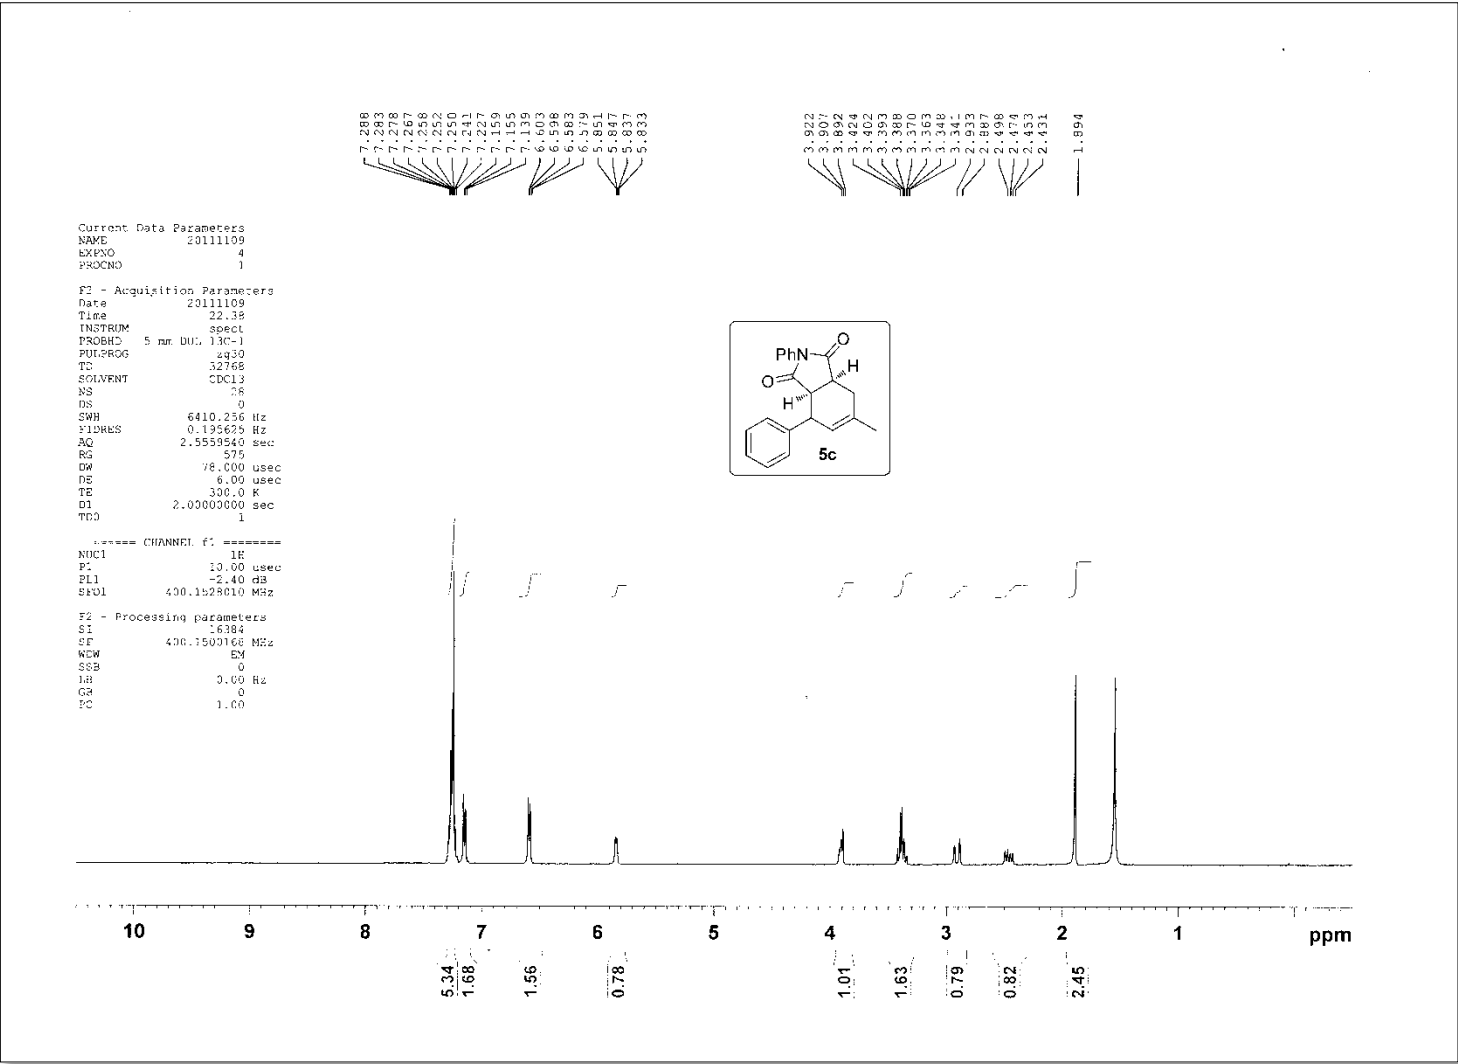

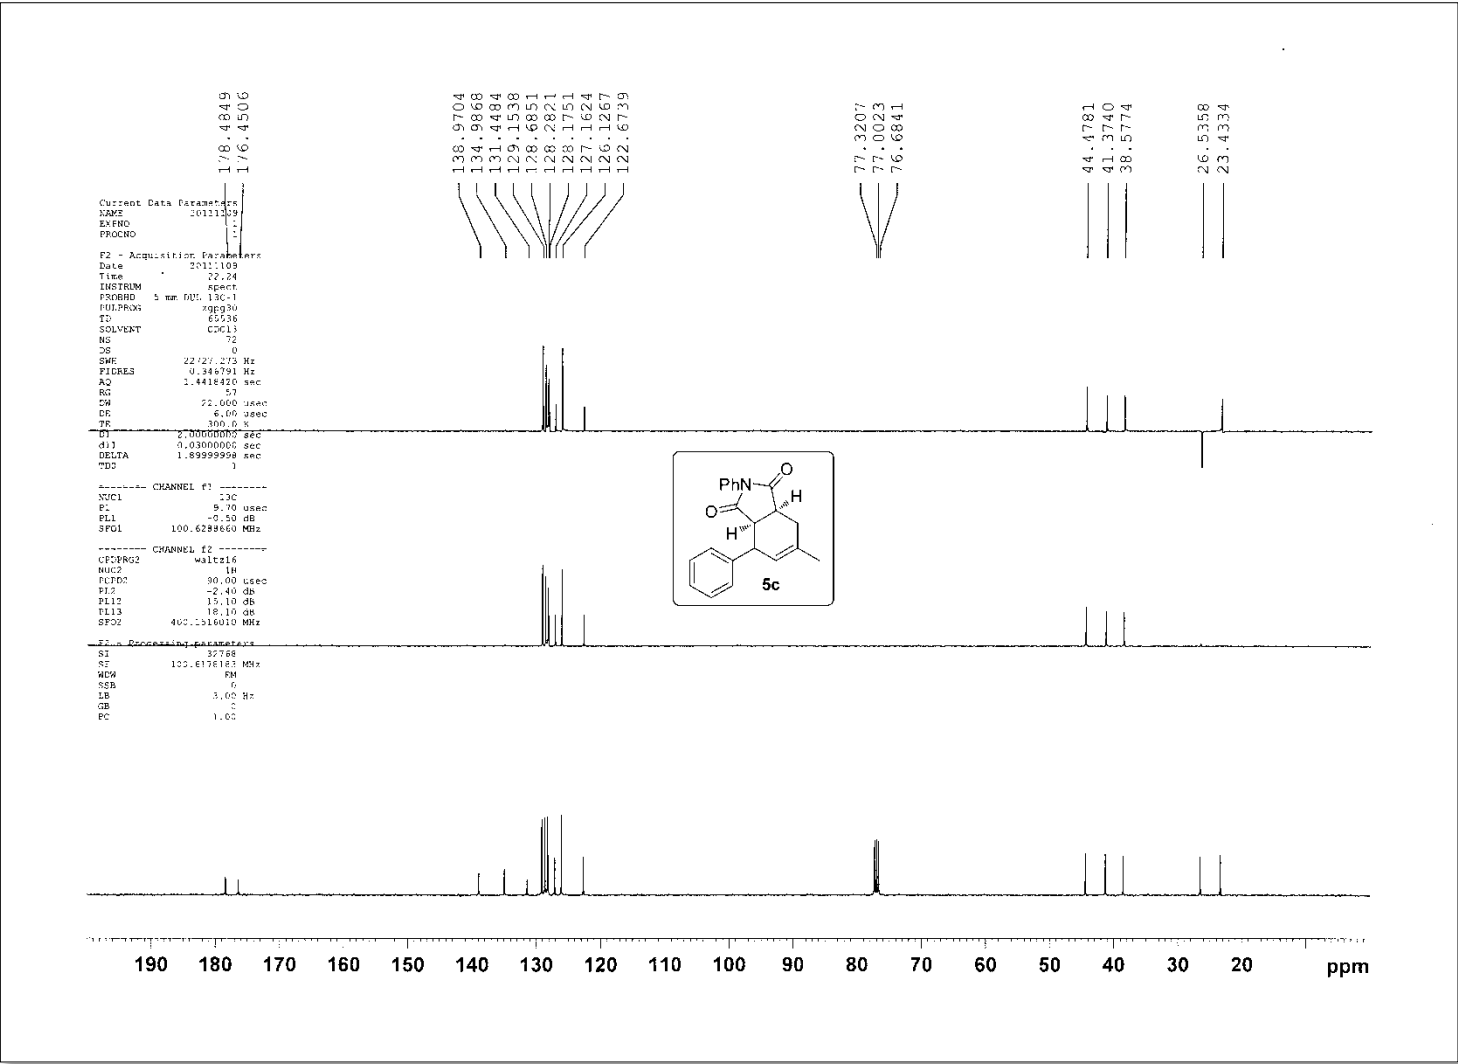

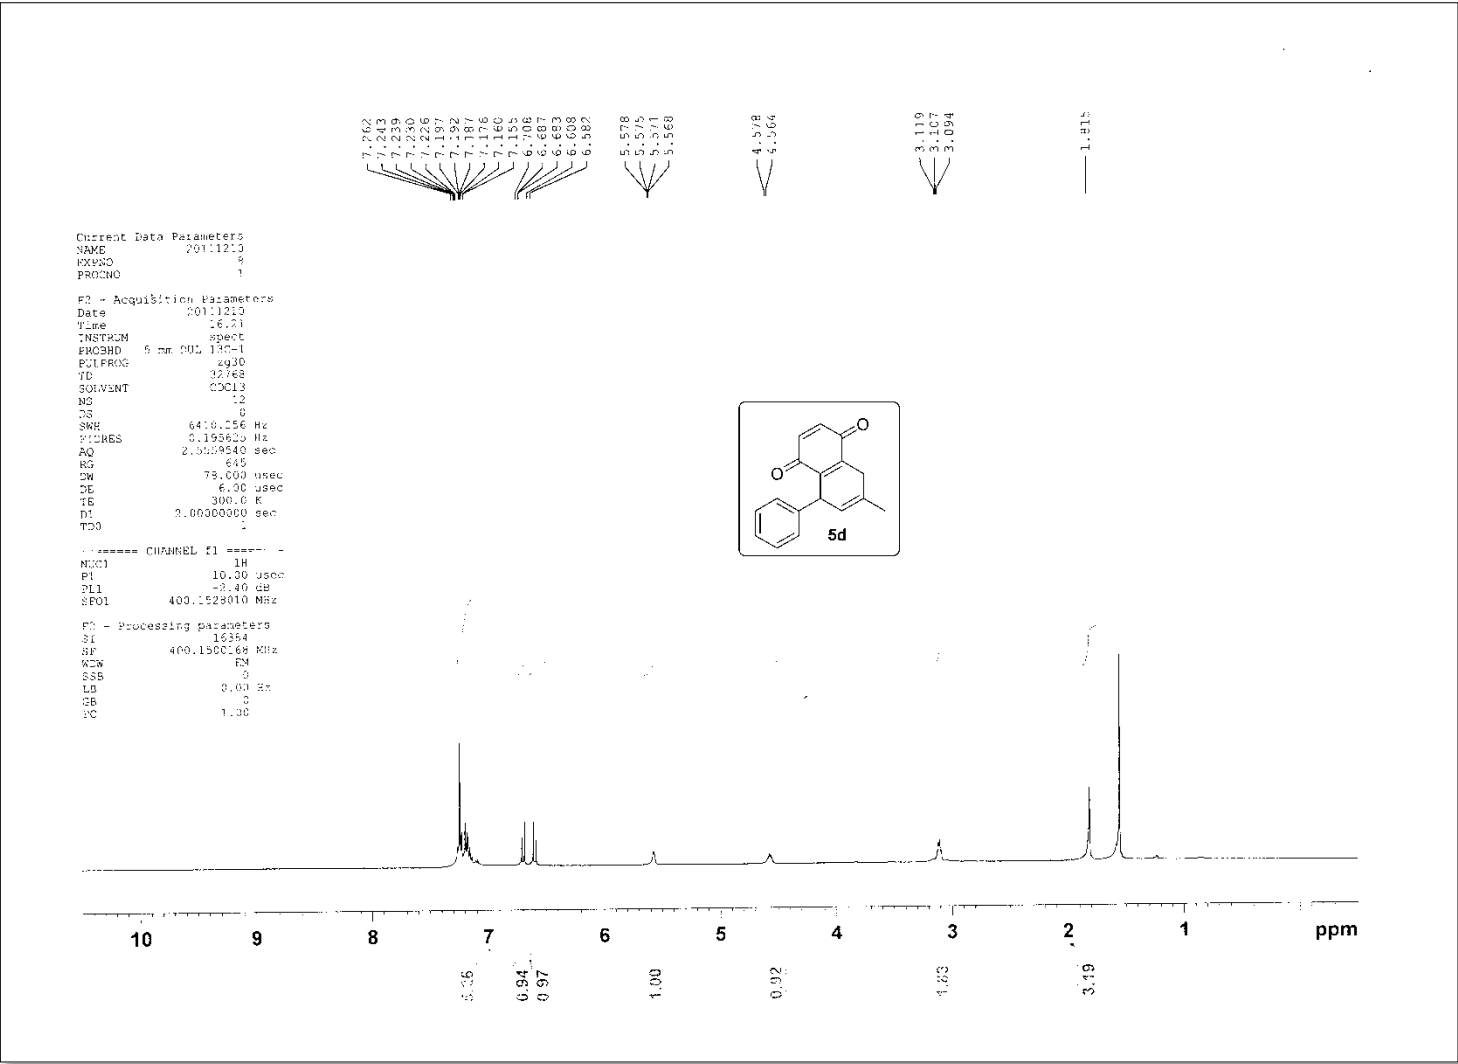

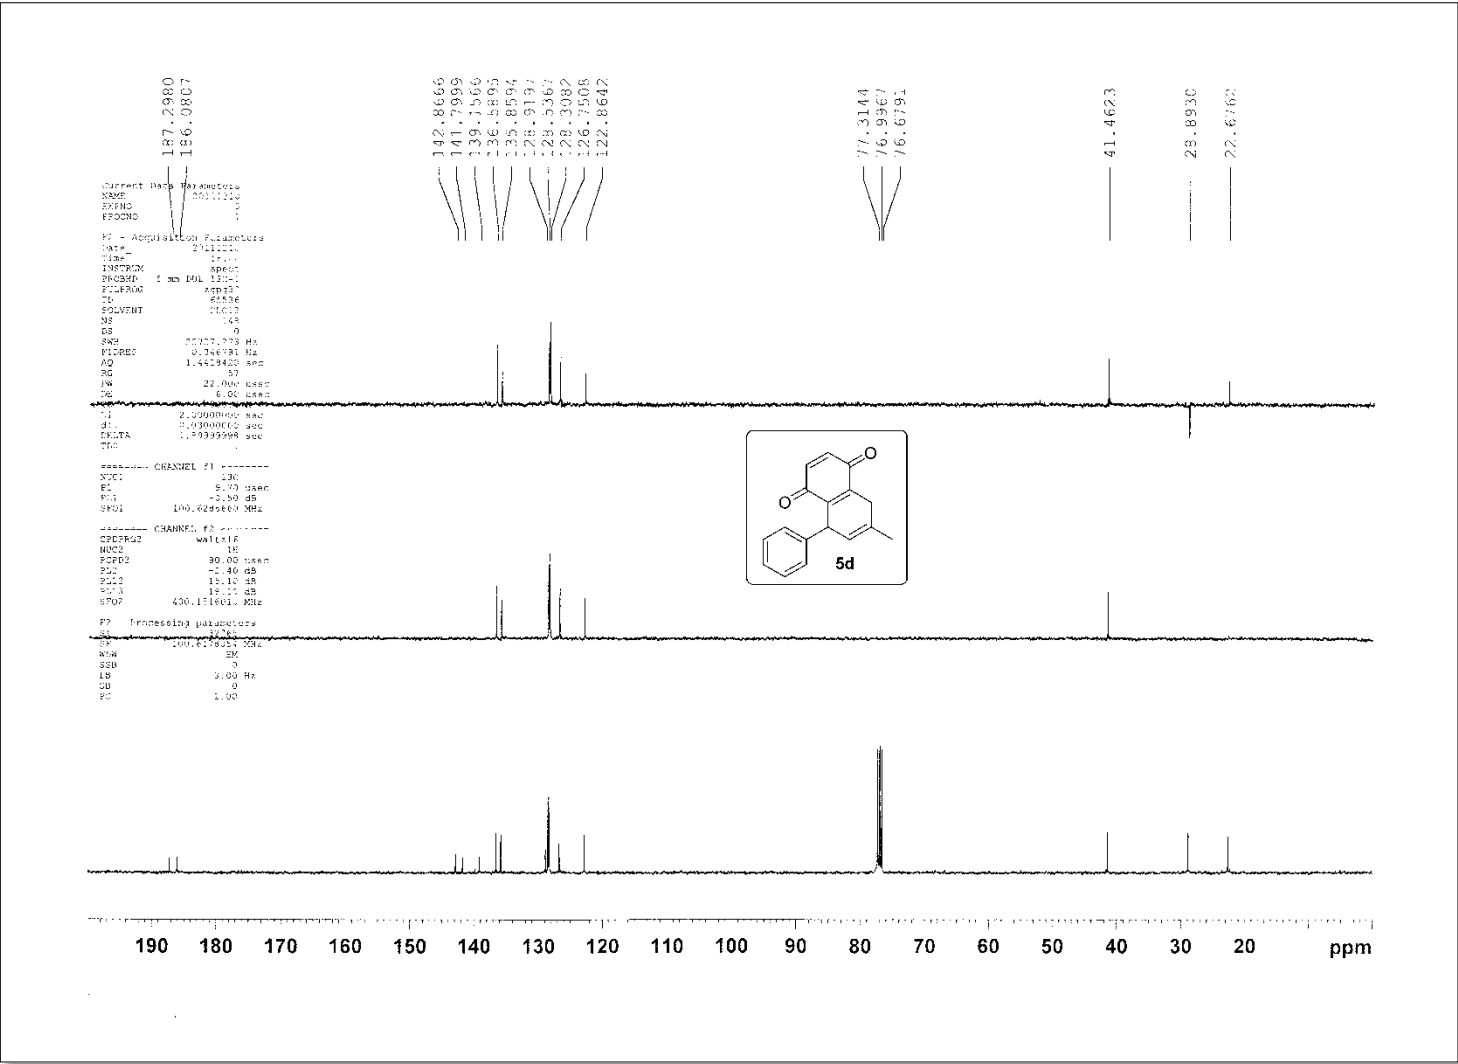

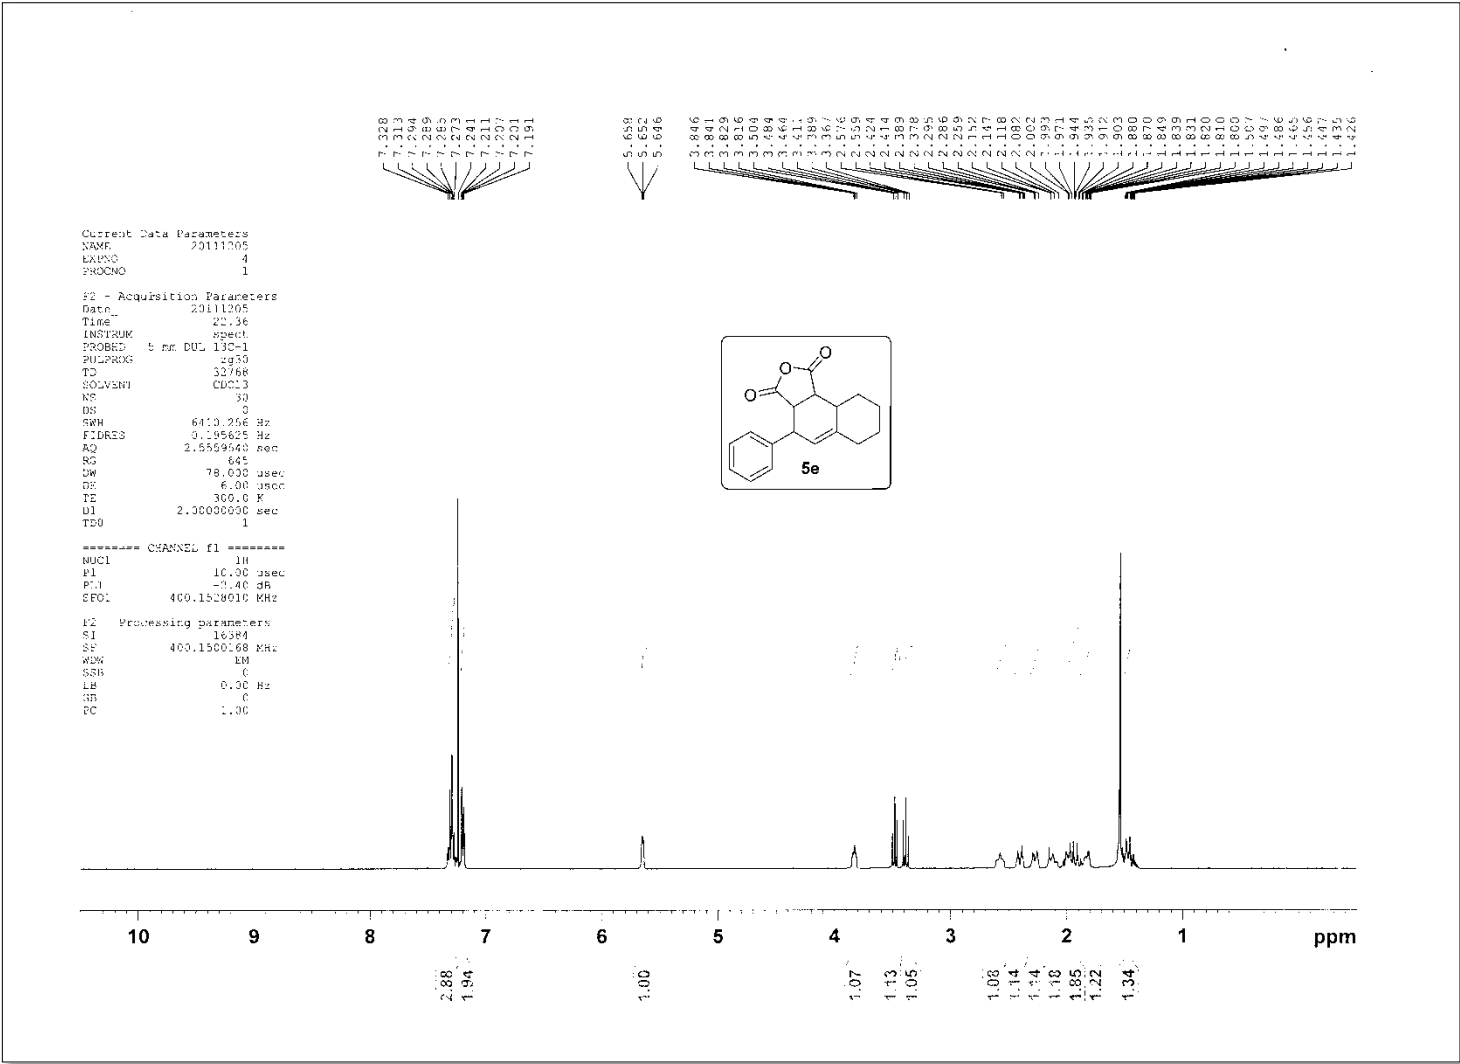

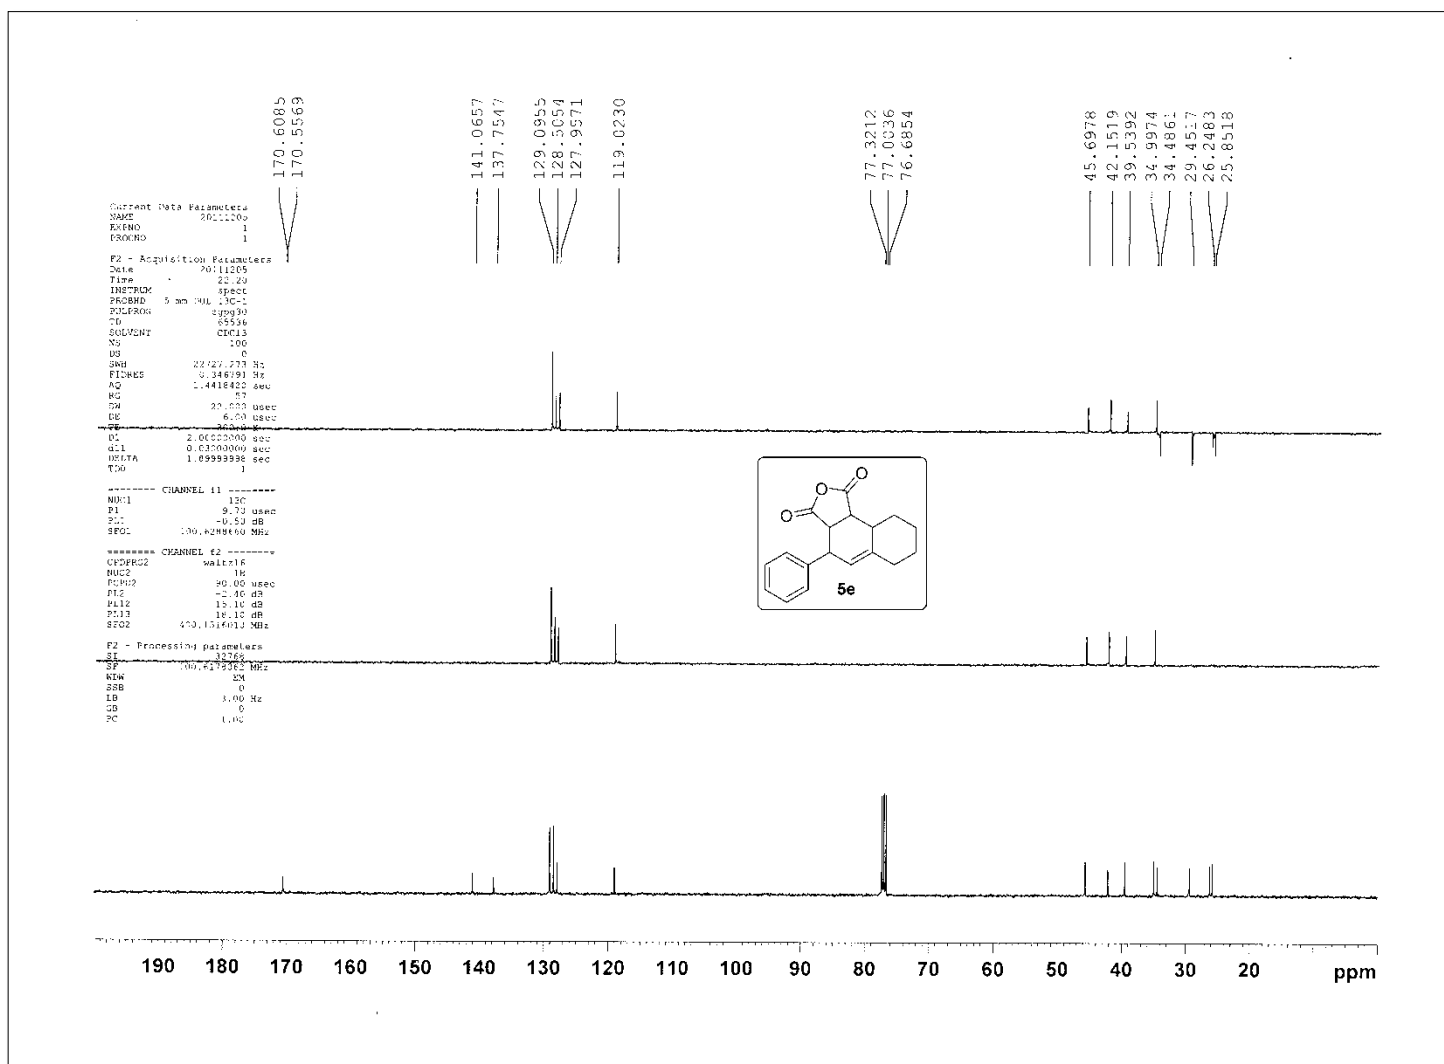

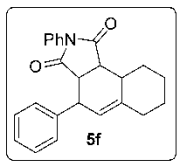

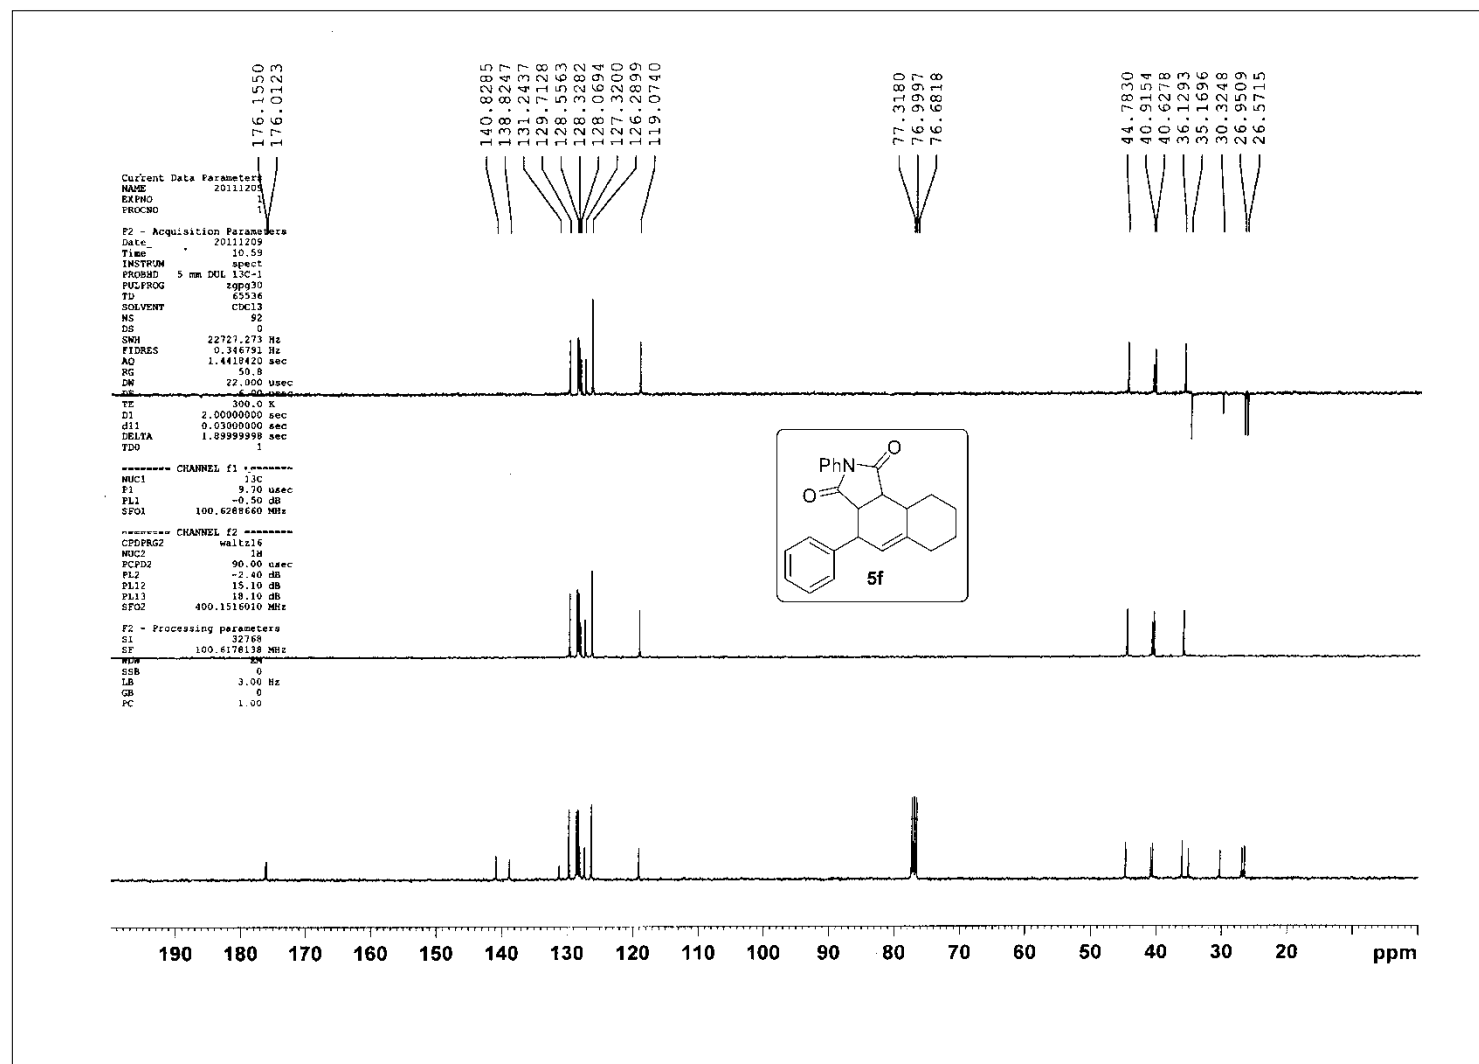

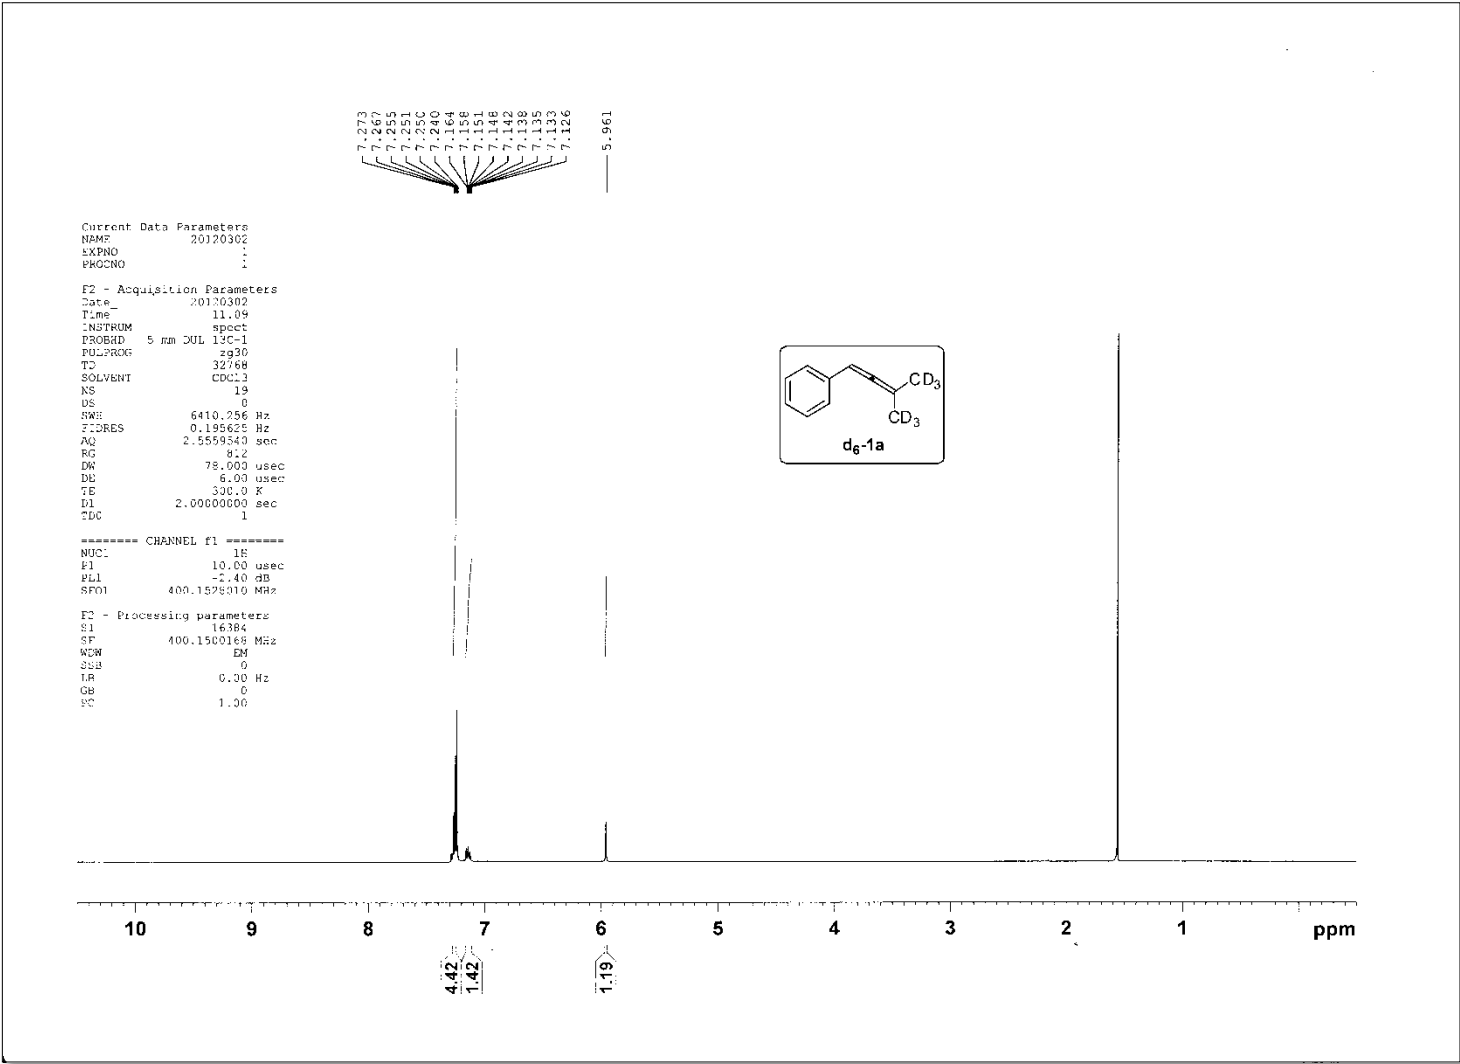

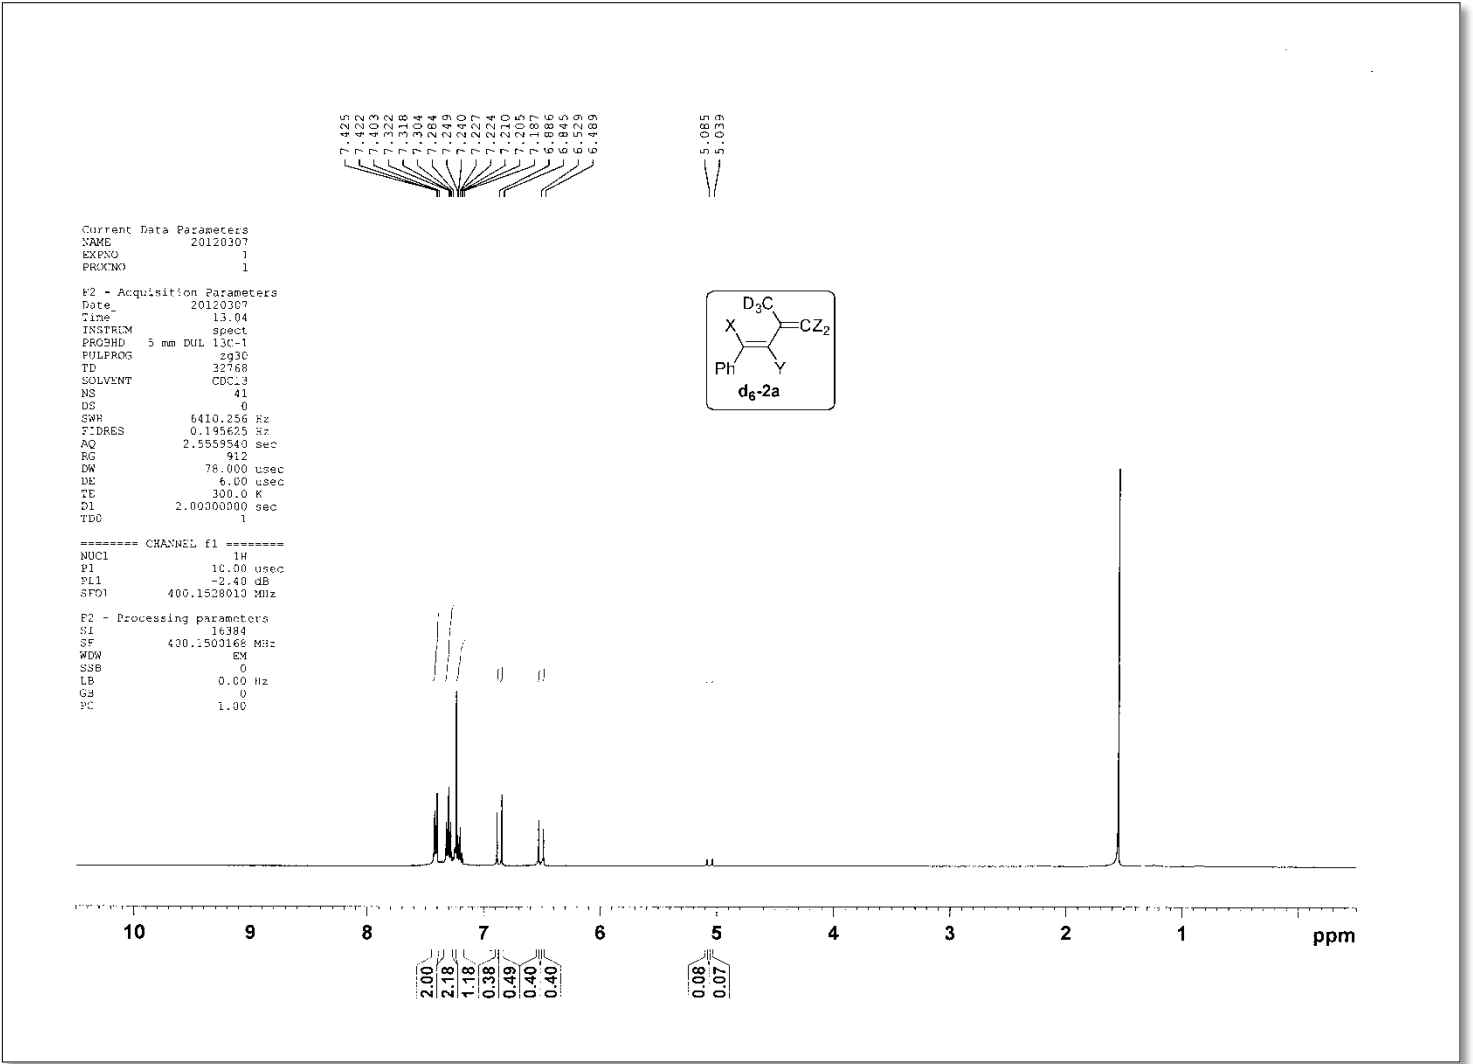

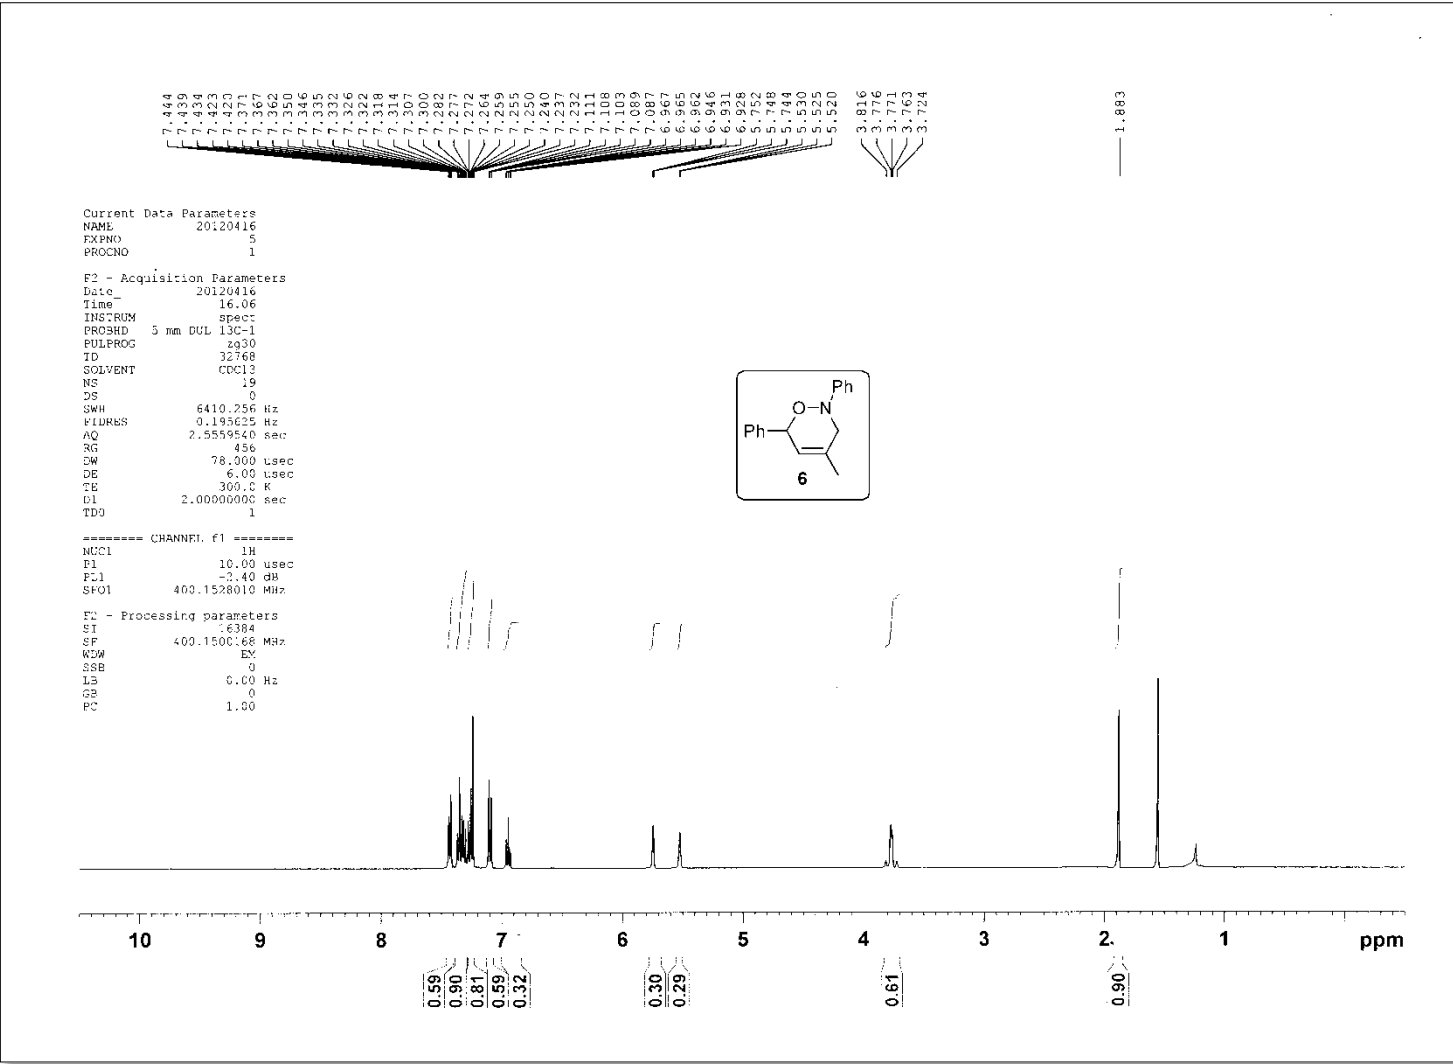

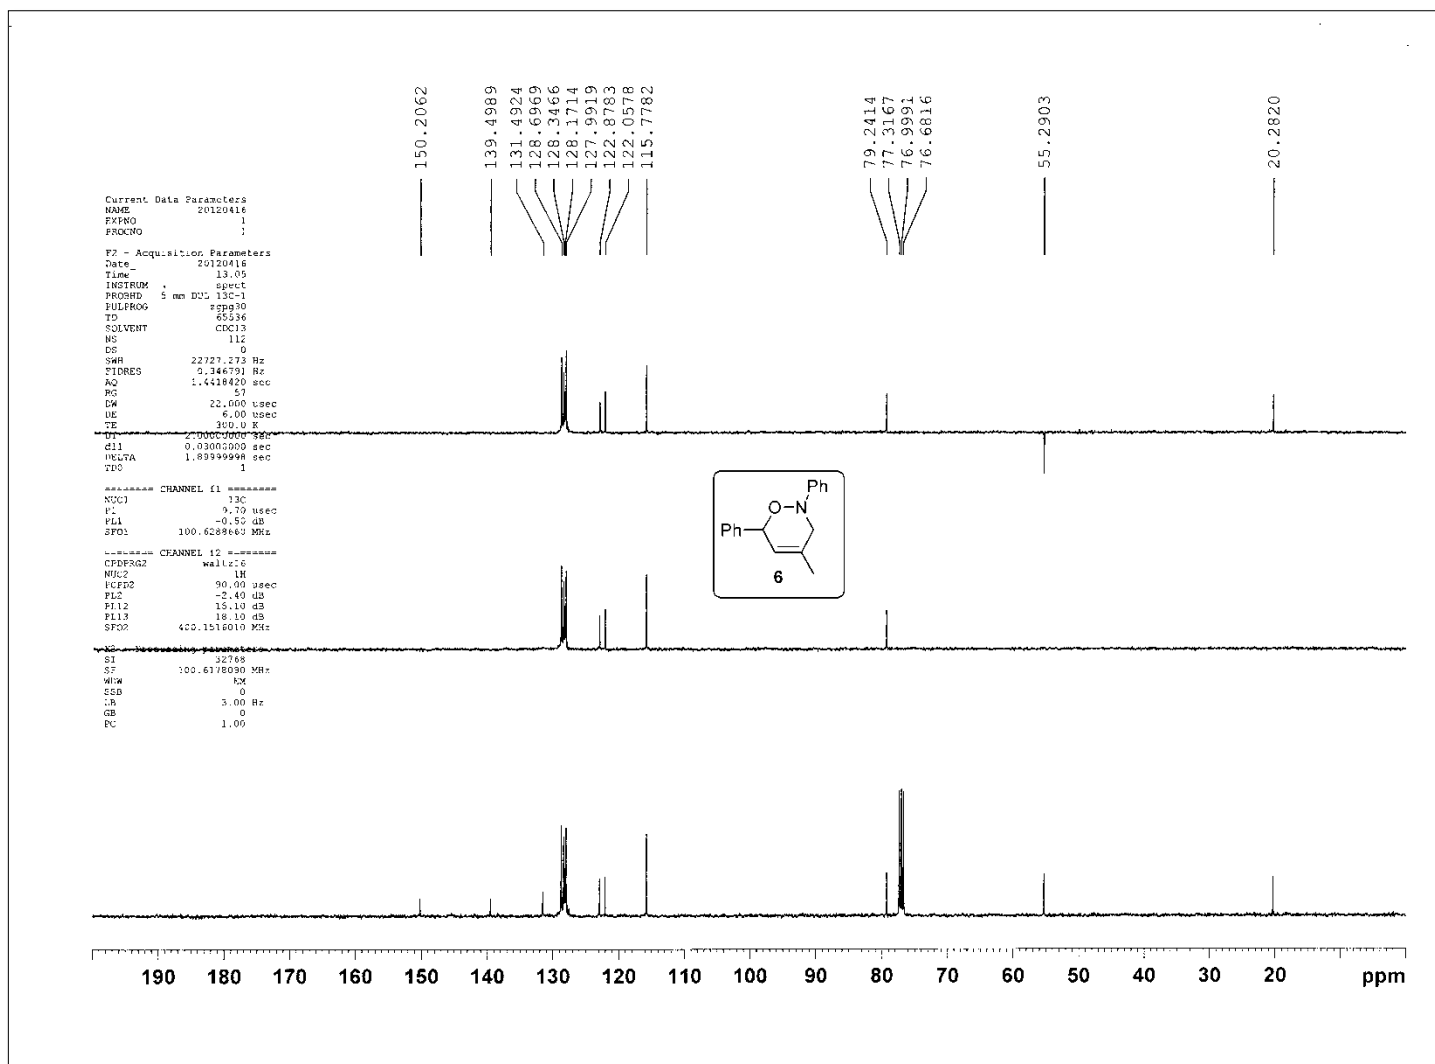

Supplement: c2cc32131a.pdf [file c2cc32131a.pdf]
